# Supplementary material for: Differentially expressed genes related to oxidoreductase activity and glutathione metabolism underlying the adaptation of Phragmites australis from the salt marsh in the Yellow River Delta, China
Source: PeerJ. 2020 Oct 2;8:e10024. doi: 10.7717/peerj.10024 (PMC7537617; doi:10.7717/peerj.10024)
Supplement: Dataset S1 — The first sheet is the up-regulated genes shown in Fig. 2, and the second sheet is the down-regulated genes shown in Fig. 3. [file peerj-08-10024-s011.xlsx]

## Sheet: Up-regulated genes
The up-regulated genes shown in Venn diagram Fig.2. "T300vsT0-yes-F300vsF0-no" means up-regulated genes in "T300 vs T0" but not "F300 vs F0"; "T300vsT0-yes-F300vsF0-yes" means up-regulated genes in both "T300 vs T0" and "F300 vs F0"; "T300vsT0-no-F300vsF0-yes" is up-regulated genes in "F300 vs F0" but not "T300 vs T0".
Note:T0 is the tidal reed with 0 mmol/L NaCl treatment, and T300 is the tidal reed with 300 mmol/L NaCl treatment. F0 indicates the freshwater reed with 0 mmol/L NaCl treatment, and F300 is the freshwater reed with 300 mmol/L NaCl treatment
T300vsT0-yes-F300vsF0-no	T300vsT0-yes-F300vsF0-yes	T300vsT0-no-F300vsF0-yes
Cluster-26447.87879	Cluster-26447.60056	Cluster-26447.179226
Cluster-26447.206705	Cluster-26447.26693	Cluster-26447.58049
Cluster-26447.86266	Cluster-26447.127470	Cluster-26447.108802
Cluster-26447.100100		Cluster-26447.113459
Cluster-26447.121686		Cluster-26447.59679
Cluster-26447.59916		Cluster-26447.60958
Cluster-26447.62824		Cluster-26447.126312
Cluster-26447.65281		Cluster-26447.93917
Cluster-26447.81411		Cluster-26447.151180
Cluster-26447.95213		Cluster-26447.86332
Cluster-26447.94500		Cluster-26447.48426
Cluster-26447.58449		Cluster-26447.77618
Cluster-26447.136982		Cluster-26447.81636
Cluster-26447.155828		Cluster-26447.54843
Cluster-26447.82285		Cluster-26447.157950
Cluster-26447.109603		Cluster-26447.83741
Cluster-26447.71659		Cluster-26447.75989
Cluster-26447.110484		Cluster-26447.22851
Cluster-26447.173983		Cluster-26447.69154
Cluster-26447.86326		Cluster-26447.153915
Cluster-26447.37685		Cluster-26447.167544
Cluster-26447.105501		Cluster-26447.171289
Cluster-26447.152204		Cluster-26447.52309
Cluster-26447.103231		Cluster-26447.68698
Cluster-26447.46663		Cluster-26447.114304
Cluster-26447.129879		Cluster-26447.136534
Cluster-26447.148230		Cluster-26447.104105
Cluster-26447.133826		Cluster-26447.134604
Cluster-26447.173555		Cluster-26447.127100
Cluster-26447.190134		Cluster-26447.150435
Cluster-26447.42067		Cluster-26447.108071
Cluster-26447.84191		Cluster-26447.148550
Cluster-26447.105017		Cluster-26447.162137
Cluster-26447.159084		Cluster-26447.137910
Cluster-26447.132964		Cluster-26447.160806
Cluster-26447.125929		Cluster-26447.134177
Cluster-26447.179322		Cluster-26447.32531
Cluster-26447.84850		Cluster-26447.83524
Cluster-26447.56726		Cluster-26447.133294
Cluster-26447.197923		Cluster-26447.118498
Cluster-26447.205495		Cluster-25584.0
Cluster-26447.105290		Cluster-26447.45927
Cluster-26447.109208		Cluster-26447.90170
Cluster-26447.110661		Cluster-26447.112971
Cluster-26447.117379		Cluster-26447.180015
Cluster-26447.152478		Cluster-26447.36582
Cluster-26447.201669		Cluster-26447.74619
Cluster-26447.54714		Cluster-26447.136419
Cluster-26447.65289		Cluster-26447.128085
Cluster-26447.81562		Cluster-26447.65595
Cluster-26447.107160		Cluster-26447.84251
Cluster-26447.114702		Cluster-26447.180635
Cluster-26447.124429		Cluster-26447.170221
Cluster-26447.66326		Cluster-26447.35184
Cluster-26447.170153		Cluster-26447.100101
Cluster-26447.40614		Cluster-26447.84748
Cluster-26447.109344		Cluster-26447.112821
Cluster-26447.121410		Cluster-26447.53519
Cluster-26447.110198		Cluster-26447.136422
Cluster-26447.67906		Cluster-26447.68366
Cluster-26447.106238		Cluster-26447.115361
Cluster-26447.61385		Cluster-26447.173828
Cluster-26447.69883		Cluster-26447.108568
Cluster-26447.107157		Cluster-26447.109037
Cluster-26447.13031		Cluster-26447.60057
Cluster-26447.184313		Cluster-26447.179436
Cluster-26447.186119		Cluster-26447.120821
Cluster-26447.97927		Cluster-26447.129851
Cluster-26447.135538		Cluster-26447.158089
Cluster-26447.202482		Cluster-26447.130146
Cluster-26447.113958		Cluster-26447.168234
Cluster-26447.41274		Cluster-26447.187600
Cluster-26447.122810		Cluster-26447.121473
Cluster-26447.85635		Cluster-26447.35887
Cluster-26447.147762		Cluster-26447.180566
Cluster-26447.75195		Cluster-26447.82125
Cluster-26447.117800		Cluster-26447.119077
Cluster-26447.109088		Cluster-26447.38281
Cluster-26447.117840		Cluster-26447.123066
Cluster-26447.39934		Cluster-26447.133930
Cluster-26447.82299		Cluster-26447.147944
Cluster-26447.133329		Cluster-26447.104070
Cluster-26447.128951		Cluster-26447.59732
Cluster-26447.130453		Cluster-26447.106325
Cluster-26447.207366		Cluster-26447.116273
Cluster-26447.125377		Cluster-26447.149021
Cluster-26447.51710		Cluster-26447.180916
Cluster-26447.113791		Cluster-7429.5
Cluster-26447.12934		Cluster-26447.155249
Cluster-26447.54255		Cluster-26447.88002
Cluster-26447.79081		Cluster-26447.169902
Cluster-26447.52943		Cluster-26447.98155
Cluster-26447.106850		Cluster-26447.150887
Cluster-26447.48978		Cluster-26447.57091
Cluster-26447.99255		Cluster-26447.69966
Cluster-26447.116003		Cluster-26447.119834
Cluster-26447.120331		Cluster-26447.123654
Cluster-26447.103729		Cluster-26447.102870
Cluster-26447.12358		Cluster-26447.19639
Cluster-26447.185494		Cluster-26447.53517
Cluster-26447.55740		Cluster-26447.195069
Cluster-26447.124172		Cluster-26447.71593
Cluster-26447.158404		Cluster-26447.108367
Cluster-26447.204617		Cluster-26447.135868
Cluster-26447.113291		Cluster-26447.82798
Cluster-26447.96703		Cluster-26447.102248
Cluster-26447.86969		Cluster-26447.157471
Cluster-26447.107804		Cluster-26447.33595
Cluster-26447.108565		Cluster-26447.169484
Cluster-26447.109788		Cluster-26447.69198
Cluster-26447.111541		Cluster-26447.99077
Cluster-26447.152201		Cluster-26447.24876
Cluster-26447.198781		Cluster-26447.155529
Cluster-26447.65074		Cluster-26447.90489
Cluster-26447.38293		Cluster-26447.184613
Cluster-26447.48974
Cluster-26447.103408
Cluster-26447.114334
Cluster-26447.114635
Cluster-26447.119323
Cluster-26447.173511
Cluster-26447.107449
Cluster-26447.126494
Cluster-26447.58618
Cluster-26447.73502
Cluster-26447.128572
Cluster-26447.166825
Cluster-26447.207741
Cluster-26447.177865
Cluster-26447.95734
Cluster-26447.118335
Cluster-26447.135625
Cluster-26447.57851
Cluster-26447.181705
Cluster-26447.39092
Cluster-26447.117597
Cluster-26447.111620
Cluster-26447.115310
Cluster-26447.11958
Cluster-26447.33566
Cluster-26447.58613
Cluster-26447.71688
Cluster-4675.0
Cluster-26447.151524
Cluster-26447.20699
Cluster-26447.177505
Cluster-26447.118198
Cluster-26447.133996
Cluster-26447.208164
Cluster-864.5
Cluster-26447.95406
Cluster-26447.94538
Cluster-26447.102375
Cluster-26447.91564
Cluster-26447.11090
Cluster-26447.118735
Cluster-26447.173733
Cluster-26447.76180
Cluster-26447.77926
Cluster-26447.99447
Cluster-26447.12782
Cluster-26447.124528
Cluster-26447.68809
Cluster-26447.68348
Cluster-26447.125274
Cluster-26447.81057
Cluster-26447.100556
Cluster-26447.100060
Cluster-26447.112326
Cluster-26447.119766
Cluster-26447.130310
Cluster-26447.204267
Cluster-26447.58956
Cluster-26447.99448
Cluster-26447.143851
Cluster-26447.166844
Cluster-26447.11404
Cluster-26447.89654
Cluster-26447.165515
Cluster-26447.156375
Cluster-26447.108092
Cluster-26447.103711
Cluster-26447.62627
Cluster-26447.68808
Cluster-26447.78276
Cluster-26447.114277
Cluster-26447.91523
Cluster-26447.57660
Cluster-26447.57664
Cluster-26447.79310
Cluster-26447.256
Cluster-26447.147030
Cluster-26447.83614
Cluster-26447.101680
Cluster-26447.13906
Cluster-26447.82222
Cluster-26447.211242
Cluster-26447.104206
Cluster-26447.105012
Cluster-26447.125048
Cluster-26447.26494
Cluster-26447.93149
Cluster-26447.174831
Cluster-26447.105010
Cluster-26447.150239
Cluster-26447.155043
Cluster-26447.9847
Cluster-26447.146841
Cluster-26447.126168
Cluster-26447.27366
Cluster-26447.12397
Cluster-26447.1434
Cluster-26447.27576
Cluster-26447.90192
Cluster-26447.72770
Cluster-26447.107355
Cluster-26447.111429
Cluster-26447.156490
Cluster-26447.204021
Cluster-26447.54254
Cluster-26447.117627
Cluster-26447.123326
Cluster-26447.88508
Cluster-26447.77786
Cluster-26447.132457
Cluster-26447.113331
Cluster-26447.204281
Cluster-26447.31374
Cluster-26447.123161
Cluster-26447.57504
Cluster-26447.114984
Cluster-26447.213847
Cluster-26447.58286
Cluster-26447.95209
Cluster-26447.112768
Cluster-26447.166543
Cluster-26447.180078
Cluster-26447.113691
Cluster-26447.10459
Cluster-26447.12305
Cluster-26447.28719
Cluster-26447.110207
Cluster-26447.43676
Cluster-26447.84696
Cluster-26447.13079
Cluster-26447.93382
Cluster-26447.66120
Cluster-26447.149497
Cluster-26447.68163
Cluster-26447.110145
Cluster-26447.69663
Cluster-26447.12515
Cluster-26447.57303
Cluster-26447.6320
Cluster-26447.154204
Cluster-26447.57435
Cluster-26447.109701
Cluster-26447.121272
Cluster-26447.39033
Cluster-26447.67181
Cluster-26447.84250
Cluster-26447.124826
Cluster-26447.207639
Cluster-26447.115151
Cluster-26447.110455
Cluster-26447.111580
Cluster-26447.204715
Cluster-26447.34651
Cluster-26447.46464
Cluster-26447.154770
Cluster-26447.55800
Cluster-5574.6
Cluster-26447.1354
Cluster-26447.144786
Cluster-26447.180071
Cluster-26447.190563
Cluster-26447.68822
Cluster-26447.74407
Cluster-26447.11117
Cluster-26447.129531
Cluster-26447.205218
Cluster-26447.42104
Cluster-26447.9599
Cluster-26447.107986
Cluster-26447.177405
Cluster-26447.50022
Cluster-26447.98916
Cluster-26447.107198
Cluster-26447.69158
Cluster-26447.93121
Cluster-26447.112158
Cluster-26447.153383
Cluster-26447.9960
Cluster-26447.98682
Cluster-26447.123882
Cluster-26447.59987
Cluster-26447.53906
Cluster-26447.57410
Cluster-26447.143522
Cluster-26447.121878
Cluster-26447.124902
Cluster-26447.206995
Cluster-26447.70052
Cluster-26447.136032
Cluster-26447.105816
Cluster-26447.126825
Cluster-26447.48334
Cluster-26447.118068
Cluster-26447.158690
Cluster-26447.77281
Cluster-26447.62479
Cluster-26447.124497
Cluster-26447.204102
Cluster-26447.102600
Cluster-26447.143275
Cluster-26447.155053
Cluster-26447.180052
Cluster-26447.45997
Cluster-26447.60114
Cluster-26447.93144
Cluster-26447.97308
Cluster-26447.141736
Cluster-26447.105908
Cluster-26447.106982
Cluster-26447.115993
Cluster-26447.117280
Cluster-26447.132894
Cluster-26447.142730
Cluster-26447.148206
Cluster-26447.101907
Cluster-26447.113003
Cluster-26447.183831
Cluster-26447.205440
Cluster-1093.5
Cluster-26447.207435
Cluster-26447.118759
Cluster-26447.167589
Cluster-26447.177032
Cluster-26447.182981
Cluster-26447.205908
Cluster-26447.75713
Cluster-26447.134519
Cluster-26447.1581
Cluster-26447.93630
Cluster-26447.158060
Cluster-26447.113900
Cluster-26447.142660
Cluster-26447.188655
Cluster-26447.204604
Cluster-26447.82328
Cluster-26447.150712
Cluster-26447.203505
Cluster-26447.97798
Cluster-26447.181649
Cluster-26447.90194
Cluster-26447.105457
Cluster-26447.9664
Cluster-26447.206258
Cluster-26447.100703
Cluster-26447.105259
Cluster-26447.120346
Cluster-26447.156997
Cluster-26447.160641
Cluster-26447.75927
Cluster-26447.77096
Cluster-26447.103544
Cluster-26447.174995
Cluster-26447.197252
Cluster-26447.206666
Cluster-26447.55401
Cluster-26447.745
Cluster-936.1
Cluster-26447.205596
Cluster-26447.137664
Cluster-26447.145860
Cluster-26447.164929
Cluster-26447.57307
Cluster-26447.63272
Cluster-26447.72029
Cluster-26447.92895
Cluster-26447.9408
Cluster-26447.74527
Cluster-26447.56934
Cluster-26447.81554
Cluster-26447.122732
Cluster-26447.53507
Cluster-26447.181675
Cluster-26447.121926
Cluster-26447.18551
Cluster-26447.120301
Cluster-26447.153319
Cluster-26447.83861
Cluster-26447.111037
Cluster-26447.115467
Cluster-26447.120306
Cluster-26447.100558
Cluster-26447.157381
Cluster-26447.90256
Cluster-26447.156147
Cluster-26447.159650
Cluster-26447.196956
Cluster-26447.48824
Cluster-26447.58799
Cluster-26447.6173
Cluster-26447.100182
Cluster-26447.107428
Cluster-26447.109407
Cluster-26447.215751
Cluster-26447.66306
Cluster-14839.3
Cluster-26447.143685
Cluster-26447.187847
Cluster-26447.58015
Cluster-26447.113281
Cluster-26447.12295
Cluster-1196.0
Cluster-26447.12032
Cluster-26447.177709
Cluster-26447.45139
Cluster-26447.22355
Cluster-26447.147946
Cluster-26447.180581
Cluster-26447.189250
Cluster-26447.83255
Cluster-26447.62499
Cluster-26447.105197
Cluster-26447.13021
Cluster-26447.180550
Cluster-26447.52196
Cluster-26447.106293
Cluster-26447.111320
Cluster-26447.135443
Cluster-26447.216958
Cluster-26447.953
Cluster-26447.135732
Cluster-12542.0
Cluster-26447.185724
Cluster-26447.77784
Cluster-26447.114501
Cluster-26447.1908
Cluster-26447.102199
Cluster-26447.10933
Cluster-26447.12834
Cluster-26447.158967
Cluster-26447.199694
Cluster-26447.121612
Cluster-26447.72775
Cluster-26447.160087
Cluster-26447.17376
Cluster-26447.204930
Cluster-26447.155054
Cluster-26447.82999
Cluster-26447.122713
Cluster-26447.128672
Cluster-26447.76317
Cluster-26447.206479
Cluster-26447.26715
Cluster-26447.123263
Cluster-784.0
Cluster-26447.10814
Cluster-26447.113763
Cluster-26447.152400
Cluster-26447.188260
Cluster-26447.131610
Cluster-26447.123225
Cluster-26447.33127
Cluster-26447.52467
Cluster-26447.181385
Cluster-26447.112151
Cluster-26447.146706
Cluster-26447.179927
Cluster-26447.187623
Cluster-26447.205786
Cluster-26447.30797
Cluster-26447.134447
Cluster-26447.85601
Cluster-26447.79677
Cluster-26447.65687
Cluster-26447.125593
Cluster-26447.45949
Cluster-26447.213468
Cluster-26447.58960
Cluster-26447.68826
Cluster-26447.90027
Cluster-26447.216733
Cluster-20433.0
Cluster-26447.107555
Cluster-26447.115845
Cluster-26447.159813
Cluster-26447.129949
Cluster-26447.105731
Cluster-26447.166092
Cluster-26447.94856
Cluster-26447.134629
Cluster-26447.77712
Cluster-26447.182086
Cluster-26447.90351
Cluster-26447.93043
Cluster-26447.97272
Cluster-26447.55901
Cluster-26447.205592
Cluster-26447.1432
Cluster-26447.206908
Cluster-26447.48425
Cluster-26447.110133
Cluster-26447.120543
Cluster-26447.140126
Cluster-26447.22523
Cluster-31356.0
Cluster-26447.112422
Cluster-26447.130688
Cluster-26447.147428
Cluster-26447.38928
Cluster-26447.44231
Cluster-26447.66609
Cluster-26447.99074
Cluster-26447.206043
Cluster-26447.26018
Cluster-26447.10935
Cluster-26447.180072
Cluster-26447.97817
Cluster-26447.142264
Cluster-748.0
Cluster-26447.52385
Cluster-26447.141958
Cluster-26447.167600
Cluster-26447.59922
Cluster-26447.198821
Cluster-26447.96215
Cluster-26447.114515
Cluster-26447.127585
Cluster-26447.130231
Cluster-26447.28606
Cluster-26447.65361
Cluster-26447.83641
Cluster-26447.208563
Cluster-26447.119248
Cluster-26447.91082
Cluster-26447.6629
Cluster-26447.205431
Cluster-26447.117301
Cluster-26447.168413
Cluster-17348.0
Cluster-26447.147631
Cluster-26447.167009
Cluster-26447.207713
Cluster-26447.95832
Cluster-4183.0
Cluster-26447.22739
Cluster-26447.26075
Cluster-26447.207516
Cluster-26447.95407
Cluster-26447.177111
Cluster-26447.117596
Cluster-26447.131721
Cluster-26447.144650
Cluster-26447.111366
Cluster-26447.211131
Cluster-26447.101528
Cluster-26447.36118
Cluster-26447.65262
Cluster-26447.188058
Cluster-26447.141384
Cluster-26447.182885
Cluster-26447.177110
Cluster-26447.109529
Cluster-26447.53031
Cluster-26447.113906
Cluster-26447.33687
Cluster-26447.96655
Cluster-26447.133331
Cluster-26447.85837
Cluster-27641.0
Cluster-26447.125406
Cluster-26447.144784
Cluster-26447.1041
Cluster-26447.147561
Cluster-26447.160591
Cluster-26447.204132
Cluster-26447.85436
Cluster-26447.118732
Cluster-26447.147570
Cluster-26447.37339
Cluster-26447.204353
Cluster-26447.68560
Cluster-26447.136985
Cluster-26447.109892
Cluster-26447.145209
Cluster-26447.151030
Cluster-26447.142512
Cluster-26447.24842
Cluster-26447.36563
Cluster-26447.166451
Cluster-26447.216428
Cluster-26447.81324
Cluster-26447.72759
Cluster-26447.13697
Cluster-26447.153114
Cluster-26447.135875
Cluster-26447.172340
Cluster-26447.564
Cluster-26447.84716
Cluster-26447.3892
Cluster-26447.74667
Cluster-26447.91038
Cluster-26447.84345
Cluster-26447.30922
Cluster-26447.120083
Cluster-26447.147131
Cluster-26447.87881
Cluster-26447.93123
Cluster-26447.197696
Cluster-26447.68123
Cluster-26447.179565
Cluster-26447.2402
Cluster-26447.48330
Cluster-26447.142803
Cluster-26447.126367
Cluster-26447.204181
Cluster-26447.27365
Cluster-26447.46051
Cluster-8591.0
Cluster-26447.77936
Cluster-26447.132313
Cluster-11684.0
Cluster-26447.144661
Cluster-26447.53809
Cluster-26447.74952
Cluster-26447.91559
Cluster-26447.38377
Cluster-26447.933
Cluster-26447.164935
Cluster-26447.181772
Cluster-26447.18628
Cluster-26447.205040
Cluster-26447.81244
Cluster-26447.204304
Cluster-26447.42727
Cluster-26447.204166
Cluster-26447.86962
Cluster-26447.205299
Cluster-26447.207934
Cluster-26447.36136
Cluster-26447.40760
Cluster-26447.100545
Cluster-26447.132795
Cluster-26447.48303
Cluster-26447.9102
Cluster-26447.86003
Cluster-27210.2
Cluster-26447.155056
Cluster-26447.146700
Cluster-26447.80217
Cluster-26447.9735
Cluster-26447.122456
Cluster-26447.12655
Cluster-26447.152026
Cluster-26447.158588
Cluster-26447.166838
Cluster-26447.168299
Cluster-26447.169634
Cluster-26447.216592
Cluster-26447.61353
Cluster-26447.91562
Cluster-26447.97070
Cluster-26447.100792
Cluster-26447.109452
Cluster-26447.56669
Cluster-26447.74044
Cluster-26447.110941
Cluster-26447.101266
Cluster-26447.125016
Cluster-26447.80998
Cluster-26447.65064
Cluster-30803.0
Cluster-26447.209279
Cluster-26447.74891
Cluster-26447.130582
Cluster-26447.184919
Cluster-26447.94229
Cluster-26447.166736
Cluster-26447.100110
Cluster-26447.100547
Cluster-26447.119474
Cluster-26447.22371
Cluster-26447.66043
Cluster-26447.96591
Cluster-26447.175908
Cluster-26447.130207
Cluster-26447.152846
Cluster-26447.44385
Cluster-26447.127538
Cluster-26447.91193
Cluster-26447.33592
Cluster-26447.52842
Cluster-26447.156579
Cluster-26447.200422
Cluster-26447.201352
Cluster-26447.206350
Cluster-26447.40528
Cluster-26447.117264
Cluster-26447.132072
Cluster-26447.186401
Cluster-26447.82272
Cluster-26447.75347
Cluster-26447.113672
Cluster-26447.184774
Cluster-26447.19284
Cluster-26447.194966
Cluster-26447.204206
Cluster-26447.16498
Cluster-26447.81618
Cluster-26447.83005
Cluster-26447.91395
Cluster-26447.106016
Cluster-26447.107659
Cluster-26447.56454
Cluster-26447.65347
Cluster-26447.202449
Cluster-26447.133821
Cluster-26447.112697
Cluster-26447.205044
Cluster-26447.3680
Cluster-26447.54546
Cluster-26447.93958
Cluster-26447.107818
Cluster-26447.118800
Cluster-26447.82871
Cluster-26447.130566
Cluster-26447.164857
Cluster-26447.52210
Cluster-26447.97098
Cluster-26447.67052
Cluster-26447.110431
Cluster-26447.88401
Cluster-26447.174982
Cluster-26447.140660
Cluster-26447.138049
Cluster-26447.120663
Cluster-26447.115282
Cluster-26447.131990
Cluster-26447.159766
Cluster-26447.181533
Cluster-26447.67743
Cluster-26447.9012
Cluster-26447.167496
Cluster-26447.22521
Cluster-1340.1
Cluster-26447.206365
Cluster-26447.92046
Cluster-8903.0
Cluster-26447.99450
Cluster-26447.178802
Cluster-26447.158095
Cluster-26447.158359
Cluster-26447.182892
Cluster-26447.52167
Cluster-26447.94456
Cluster-26447.162710
Cluster-26447.23231
Cluster-26447.204799
Cluster-26447.212926
Cluster-26447.64499
Cluster-26447.9896
Cluster-26447.151551
Cluster-26447.174125
Cluster-26447.1470
Cluster-26447.152018
Cluster-26447.69821
Cluster-26447.156929
Cluster-26447.73989
Cluster-26447.144646
Cluster-26447.163505
Cluster-26447.102122
Cluster-26447.37515
Cluster-2688.5
Cluster-8806.0
Cluster-26447.11179
Cluster-26447.119099
Cluster-26447.107167
Cluster-26447.159486
Cluster-26447.179601
Cluster-26447.37937
Cluster-26447.80213
Cluster-26447.38965
Cluster-26447.173447
Cluster-26447.147470
Cluster-26447.192293
Cluster-26447.178809
Cluster-1093.2
Cluster-1384.0
Cluster-26447.141050
Cluster-26447.147095
Cluster-26447.28276
Cluster-864.2
Cluster-26447.45138
Cluster-8641.3
Cluster-26447.4740
Cluster-26447.190892
Cluster-26447.205321
Cluster-26447.67192
Cluster-26447.32109
Cluster-26447.113049
Cluster-26447.176499
Cluster-26447.188421
Cluster-26447.205866
Cluster-26447.38609
Cluster-26447.53497
Cluster-26447.170899
Cluster-26447.27742
Cluster-26447.26073
Cluster-26447.13063
Cluster-26447.46077
Cluster-26447.77681
Cluster-26447.54371
Cluster-26447.71172
Cluster-26447.156632
Cluster-26447.162135
Cluster-26447.97680
Cluster-26447.109484
Cluster-26447.110206
Cluster-26447.9026
Cluster-26447.59500
Cluster-26447.8416
Cluster-26447.96220
Cluster-26447.162694
Cluster-26447.58690
Cluster-1093.1
Cluster-26447.122104
Cluster-26447.123519
Cluster-26447.153504
Cluster-26447.20972
Cluster-26447.169437
Cluster-26447.200444
Cluster-26447.115264
Cluster-26447.133824
Cluster-26447.44224
Cluster-33129.1
Cluster-26447.117613
Cluster-26447.87581
Cluster-26447.181765
Cluster-26447.90686
Cluster-26447.165798
Cluster-26447.20884
Cluster-26447.82623
Cluster-26447.97197
Cluster-26447.10326
Cluster-26447.94540
Cluster-26447.97073
Cluster-26447.32288
Cluster-26447.120430
Cluster-26447.150586
Cluster-26447.96780
Cluster-26447.52039
Cluster-26447.204182
Cluster-26447.93222
Cluster-26447.147331
Cluster-26447.180551
Cluster-26447.40114
Cluster-26447.144960
Cluster-26447.62280
Cluster-864.7
Cluster-26447.206699
Cluster-26447.176882
Cluster-26447.22171
Cluster-26447.90419
Cluster-26447.128521
Cluster-26447.153858
Cluster-26447.195449
Cluster-458.0
Cluster-26447.66251
Cluster-26447.99606
Cluster-26447.12556
Cluster-26447.88622
Cluster-26447.103727
Cluster-26447.202629
Cluster-26447.164902
Cluster-26447.207213
Cluster-26447.47067
Cluster-26447.89264
Cluster-26447.108774
Cluster-26447.35100
Cluster-26447.149113
Cluster-26447.53102
Cluster-26447.137118
Cluster-26447.28590
Cluster-26447.102845
Cluster-26447.160685
Cluster-8641.2
Cluster-26447.135089
Cluster-26447.163880
Cluster-26447.18640
Cluster-26447.208230
Cluster-26447.81584
Cluster-26447.216685
Cluster-26447.125216
Cluster-26447.197288
Cluster-26447.216222
Cluster-26447.60113
Cluster-26447.64951
Cluster-26447.68963
Cluster-26447.89265
Cluster-26447.90428
Cluster-4869.0
Cluster-26447.164912
Cluster-26447.97842
Cluster-26447.24030
Cluster-26447.2920
Cluster-26447.81400
Cluster-26447.65290
Cluster-26447.67932
Cluster-26447.94358
Cluster-26447.129344
Cluster-26447.53496
Cluster-26447.106013
Cluster-26447.148580
Cluster-26447.102118
Cluster-26447.11255
Cluster-26447.18947
Cluster-26447.63019
Cluster-26447.162099
Cluster-26447.56531
Cluster-26447.73778
Cluster-26447.112382
Cluster-26447.63288
Cluster-26447.57455
Cluster-26447.163928
Cluster-26447.66288
Cluster-26447.127712
Cluster-26447.148200
Cluster-26447.153433
Cluster-26447.169921
Cluster-26447.88204
Cluster-26447.8490
Cluster-26447.155076
Cluster-26447.72014
Cluster-26447.173016
Cluster-26447.30715
Cluster-26447.102068
Cluster-26447.32770
Cluster-26447.11482
Cluster-26447.12106
Cluster-26447.8574
Cluster-26447.172844
Cluster-26447.1433
Cluster-26447.204570
Cluster-26447.130897
Cluster-26447.69247
Cluster-26447.10934
Cluster-26447.63369
Cluster-1298.0
Cluster-26447.194577
Cluster-2060.1
Cluster-26447.143611
Cluster-26447.15160
Cluster-26447.9136
Cluster-26447.30920
Cluster-26447.48073
Cluster-26447.87702
Cluster-26447.103862
Cluster-26447.11275
Cluster-26447.116810
Cluster-26447.154406
Cluster-26447.175970
Cluster-26447.183461
Cluster-26447.32493
Cluster-26447.40880
Cluster-26447.188474
Cluster-26447.160496
Cluster-26447.135627
Cluster-26447.207924
Cluster-26447.35196
Cluster-26447.115609
Cluster-26447.190554
Cluster-16136.0
Cluster-26447.167327
Cluster-26447.160118
Cluster-26447.160873
Cluster-26447.204994
Cluster-26447.28828
Cluster-26447.58259
Cluster-26447.105
Cluster-26447.94144
Cluster-424.0
Cluster-26447.82201
Cluster-26447.207718
Cluster-26447.61698
Cluster-26447.205736
Cluster-1202.0
Cluster-26447.136608
Cluster-26447.212001
Cluster-26447.81217
Cluster-26447.12529
Cluster-26447.17196
Cluster-26447.77645
Cluster-26447.33220
Cluster-26447.57652
Cluster-26447.115132
Cluster-26447.57657
Cluster-26447.169312
Cluster-26447.174266
Cluster-26447.205016
Cluster-26447.121382
Cluster-26447.194387
Cluster-26447.144424
Cluster-26447.127700
Cluster-26447.146268
Cluster-26447.26069
Cluster-26447.83472
Cluster-26447.12
Cluster-26447.37121
Cluster-26447.91239
Cluster-26447.152023
Cluster-26447.1324
Cluster-26447.18523
Cluster-26447.41146
Cluster-26447.211581
Cluster-26447.115836
Cluster-26447.122861
Cluster-26447.127758
Cluster-26447.86173
Cluster-26447.178801
Cluster-26447.105009
Cluster-26447.67905
Cluster-26447.54173
Cluster-26447.92151
Cluster-26447.109000
Cluster-26447.127439
Cluster-26447.18331
Cluster-26447.71948
Cluster-26447.128357
Cluster-26447.204812
Cluster-26447.48424
Cluster-26447.141879
Cluster-26447.175731
Cluster-26447.36444
Cluster-26447.23303
Cluster-26447.57317
Cluster-26447.209390
Cluster-26447.183953
Cluster-26447.130082
Cluster-26447.36306
Cluster-26447.65428
Cluster-26447.160578
Cluster-26447.180176
Cluster-26447.195688
Cluster-26447.328
Cluster-26447.43983
Cluster-26447.60366
Cluster-26447.9661
Cluster-26447.12191
Cluster-26447.166722
Cluster-26447.92037
Cluster-26447.93826
Cluster-26447.64869
Cluster-26447.83904
Cluster-26447.204952
Cluster-26447.99294
Cluster-26447.140493
Cluster-26447.162720
Cluster-26447.195148
Cluster-26447.135888
Cluster-26447.21121
Cluster-26447.213818
Cluster-26447.117062
Cluster-26447.118404
Cluster-26447.170430
Cluster-26447.206050
Cluster-26447.127427
Cluster-26447.61195
Cluster-26447.135677
Cluster-26447.204945
Cluster-26447.34796
Cluster-26447.87335
Cluster-26447.91623
Cluster-26447.214900
Cluster-26447.184773
Cluster-26447.22945
Cluster-26447.13725
Cluster-26447.61815
Cluster-26447.112972
Cluster-26447.121455
Cluster-26447.105642
Cluster-26447.123640
Cluster-26447.127080
Cluster-26447.74765
Cluster-26447.169514
Cluster-26447.145801
Cluster-26447.132750
Cluster-26447.140820
Cluster-26447.171743
Cluster-26447.174150
Cluster-26447.55764
Cluster-1202.1
Cluster-26447.115578
Cluster-26447.103432
Cluster-26447.56410
Cluster-26447.146597
Cluster-26447.159386
Cluster-26447.119064
Cluster-26447.27110
Cluster-26447.127256
Cluster-16727.6
Cluster-26447.11533
Cluster-26447.63613
Cluster-26447.10878
Cluster-26447.65084
Cluster-26447.146217
Cluster-26447.121922
Cluster-26447.135102
Cluster-26447.8177
Cluster-26447.8795
Cluster-26447.88215
Cluster-26447.67834
Cluster-26447.118665
Cluster-26447.209963
Cluster-26447.207287
Cluster-26447.9248
Cluster-26447.112257
Cluster-26447.158601
Cluster-26447.129937
Cluster-26447.207515
Cluster-26447.166184
Cluster-26447.65278
Cluster-26447.77676
Cluster-26447.176793
Cluster-26447.122503
Cluster-26447.9469
Cluster-26447.80641
Cluster-26447.107816
Cluster-30333.0
Cluster-26447.35718
Cluster-26447.38791
Cluster-26447.105025
Cluster-26447.3666
Cluster-26447.110949
Cluster-12330.0
Cluster-26447.46049
Cluster-26447.12321
Cluster-26447.42173
Cluster-1205.0
Cluster-26447.116940
Cluster-26447.12299
Cluster-26447.33271
Cluster-26447.84808
Cluster-26447.33049
Cluster-1076.1
Cluster-26447.143090
Cluster-26447.205379
Cluster-26447.99390
Cluster-26447.118364
Cluster-26447.190204
Cluster-26447.36804
Cluster-26447.41840
Cluster-26447.163900
Cluster-26447.117590
Cluster-26447.75058
Cluster-26447.110123
Cluster-26447.162961
Cluster-26447.59093
Cluster-5663.1
Cluster-26447.206690
Cluster-26447.139279
Cluster-26447.120665
Cluster-26447.71594
Cluster-26447.63027
Cluster-26447.150438
Cluster-26447.195689
Cluster-26447.70648
Cluster-26447.165876
Cluster-26447.60284
Cluster-26447.190731
Cluster-26447.207851
Cluster-26447.116169
Cluster-26447.95481
Cluster-26447.12602
Cluster-26447.175250
Cluster-26447.40233
Cluster-26447.59800
Cluster-26447.87827
Cluster-26447.107398
Cluster-26447.156995
Cluster-26447.159509
Cluster-26447.160775
Cluster-26447.185243
Cluster-26447.207214
Cluster-26447.130194
Cluster-26447.11644
Cluster-26447.147595
Cluster-26447.204981
Cluster-27328.1
Cluster-29218.0
Cluster-26447.12142
Cluster-26447.205021
Cluster-26447.170532
Cluster-26447.1639
Cluster-26447.123064
Cluster-26447.38263
Cluster-26447.100153
Cluster-26447.61261
Cluster-26447.204320
Cluster-26447.127679
Cluster-26447.73673
Cluster-26447.37151
Cluster-26447.186121
Cluster-26447.18766
Cluster-26447.145625
Cluster-26447.208529
Cluster-26447.203494
Cluster-26447.99827
Cluster-26447.179300
Cluster-26202.0
Cluster-26447.142300
Cluster-26447.200976
Cluster-26447.87175
Cluster-969.1
Cluster-26447.48576
Cluster-26447.82583
Cluster-26447.9447
Cluster-20407.0
Cluster-26447.125111
Cluster-641.0
Cluster-26447.197869
Cluster-26447.203
Cluster-26447.11824
Cluster-26447.29217
Cluster-26447.41756
Cluster-26447.111205
Cluster-26447.120607
Cluster-26447.142960
Cluster-26447.204901
Cluster-26447.95502
Cluster-26447.35603
Cluster-26447.102204
Cluster-26447.167194
Cluster-26447.182980
Cluster-26447.61713
Cluster-26447.87637
Cluster-26447.207403
Cluster-26447.16135
Cluster-26447.105829
Cluster-26447.171231
Cluster-26447.180526
Cluster-26447.40378
Cluster-26447.91473
Cluster-26447.40615
Cluster-26447.141508
Cluster-26447.119537
Cluster-26447.41961
Cluster-26447.99213
Cluster-26447.88210
Cluster-9264.0
Cluster-26447.107517
Cluster-26447.48972
Cluster-26447.112036
Cluster-26447.37459
Cluster-26447.155419
Cluster-26447.138359
Cluster-4272.5
Cluster-26447.33372
Cluster-26447.206523
Cluster-26447.34247
Cluster-26447.113937
Cluster-26447.200419
Cluster-26447.94858
Cluster-26447.159125
Cluster-26447.165528
Cluster-26447.4592
Cluster-26447.212720
Cluster-26447.9109
Cluster-26447.108819
Cluster-26447.38999
Cluster-26447.164716
Cluster-26447.205876
Cluster-26447.36635
Cluster-26447.26765
Cluster-26447.84540
Cluster-26447.216966
Cluster-26447.57567
Cluster-26447.10388
Cluster-26447.103121
Cluster-26447.63553
Cluster-26447.125074
Cluster-26447.208231
Cluster-26447.206459
Cluster-26447.166222
Cluster-26447.172672
Cluster-26447.207502
Cluster-26447.137866
Cluster-26447.141126
Cluster-26447.158795
Cluster-26447.197774
Cluster-26447.60729
Cluster-26447.185541
Cluster-26447.724
Cluster-2195.0
Cluster-26447.10494
Cluster-26447.204239
Cluster-26447.48892
Cluster-26447.58821
Cluster-26447.156505
Cluster-1213.0
Cluster-26447.188977
Cluster-26447.79875
Cluster-26447.107535
Cluster-26447.126112
Cluster-26447.71210
Cluster-26447.22696
Cluster-26447.92578
Cluster-26447.163186
Cluster-26447.127219
Cluster-26447.125982
Cluster-26447.10621
Cluster-26447.195858
Cluster-26447.206703
Cluster-26447.102121
Cluster-26447.111493
Cluster-26447.85633
Cluster-26447.34800
Cluster-26447.144958
Cluster-26447.178341
Cluster-26447.9251
Cluster-26447.181330
Cluster-26447.129960
Cluster-26447.157586
Cluster-26447.191833
Cluster-26447.12498
Cluster-26447.9095
Cluster-26447.194726
Cluster-26447.107437
Cluster-26447.37225
Cluster-26447.84141
Cluster-26447.164582
Cluster-1378.1
Cluster-26447.8565
Cluster-26447.191579
Cluster-26447.204701
Cluster-26447.204734
Cluster-26447.65167
Cluster-26447.72537
Cluster-26447.94903
Cluster-342.0
Cluster-26447.97911
Cluster-26447.66517
Cluster-26447.10959
Cluster-26447.157007
Cluster-26447.43218
Cluster-26447.185767
Cluster-26447.116403
Cluster-26447.46116
Cluster-26447.74221
Cluster-26447.205794
Cluster-26447.199707
Cluster-26447.200669
Cluster-26447.55944
Cluster-26447.68831
Cluster-26447.11686
Cluster-26447.162631
Cluster-26447.64555
Cluster-26447.40235
Cluster-26447.119868
Cluster-26447.154967
Cluster-26447.48975
Cluster-26447.68732
Cluster-26447.107672
Cluster-26447.159203
Cluster-26447.133527
Cluster-26447.116962
Cluster-26447.44436
Cluster-26447.130058
Cluster-21685.4

## Sheet: Down-regulated genes
The down-regulated genes shown in Venn diagram Fig.3. "T300vsT0-yes-F300vsF0-no" means down-regulated genes in "T300 vs T0" but not "F300 vs F0"; "T300vsT0-yes-F300vsF0-yes" means down-regulated genes in both "T300 vs T0" and "F300 vs F0"; "T300vsT0-no-F300vsF0-yes" is down-regulated genes in "F300 vs F0" but not "T300 vs T0".
Note:T0 is the tidal reed with 0 mmol/L NaCl treatment, and T300 is the tidal reed with 300 mmol/L NaCl treatment. F0 indicates the freshwater reed with 0 mmol/L NaCl treatment, and F300 is the freshwater reed with 300 mmol/L NaCl treatment
T300vsT0-yes-F300vsF0-no	T300vsT0-yes-F300vsF0-yes	T300vsT0-no-F300vsF0-yes
Cluster-26447.147490	Cluster-26447.106543	Cluster-26447.110549
Cluster-26447.58619		Cluster-26447.107475
Cluster-26447.53911		Cluster-26447.102669
Cluster-26447.132206		Cluster-26447.102438
Cluster-26447.95208		Cluster-26447.76894
Cluster-26447.99401		Cluster-26447.106875
Cluster-26447.122201		Cluster-26447.114303
Cluster-26447.70164		Cluster-26447.95358
Cluster-26447.142600		Cluster-26447.113506
Cluster-26447.212739		Cluster-26447.160124
Cluster-26447.99121		Cluster-26447.110557
Cluster-26447.147487		Cluster-26447.166186
Cluster-26447.131192		Cluster-26447.146407
Cluster-26447.137772		Cluster-26447.89192
Cluster-26447.114807		Cluster-26447.99051
Cluster-26447.117803		Cluster-26447.125081
Cluster-26447.155960		Cluster-26447.81358
Cluster-26447.84038		Cluster-26447.138575
Cluster-26447.84188		Cluster-26447.76591
Cluster-26447.158791		Cluster-26447.87175
Cluster-26447.61944		Cluster-26447.105780
Cluster-26447.169270		Cluster-26447.91923
Cluster-26447.169870		Cluster-26447.120817
Cluster-26447.16996		Cluster-26447.160788
Cluster-26447.128747		Cluster-26447.87163
Cluster-26447.19285		Cluster-26447.68673
Cluster-26447.209828		Cluster-26447.193032
Cluster-26447.65165		Cluster-26447.98658
Cluster-26447.98554		Cluster-26447.146357
Cluster-26447.142045		Cluster-26447.174361
Cluster-26447.47220		Cluster-26447.50389
Cluster-26447.152477		Cluster-26447.61347
Cluster-26447.215641		Cluster-26447.96903
Cluster-26447.200283		Cluster-26447.139748
Cluster-26447.10070		Cluster-26447.166384
Cluster-26447.107504		Cluster-26447.194088
Cluster-26447.19248		Cluster-26447.152724
Cluster-26447.41610		Cluster-26447.161639
Cluster-26447.83394		Cluster-26447.152387
Cluster-26447.33416		Cluster-26447.158987
Cluster-26447.182861		Cluster-26447.105995
Cluster-26447.120296		Cluster-26447.110051
Cluster-26447.206271		Cluster-26447.96475
Cluster-26447.16442		Cluster-26447.126774
Cluster-26447.157914		Cluster-26447.115139
Cluster-26447.119120		Cluster-26447.60919
Cluster-26447.74453		Cluster-26447.207475
Cluster-26447.153852		Cluster-26447.108655
Cluster-26447.47093		Cluster-26447.111550
Cluster-26447.92295		Cluster-26447.138106
Cluster-26447.12112		Cluster-26447.76568
Cluster-26447.114502		Cluster-26447.10981
Cluster-26447.123594		Cluster-26447.111892
Cluster-26447.138760		Cluster-26447.106973
Cluster-26447.183177		Cluster-26447.81710
Cluster-26447.117882		Cluster-26447.155816
Cluster-26447.144146		Cluster-26447.139889
Cluster-19147.0		Cluster-26447.102830
Cluster-26447.88002		Cluster-26447.121031
Cluster-26447.17487		Cluster-26447.22433
Cluster-26447.182052		Cluster-19332.0
Cluster-26447.172807		Cluster-26447.117800
Cluster-26447.85907		Cluster-26447.115280
Cluster-26447.103203		Cluster-26447.86329
Cluster-26447.84704		Cluster-26447.81735
Cluster-26447.83666		Cluster-26447.122580
Cluster-26447.212968		Cluster-26447.82750
Cluster-26447.82025		Cluster-26447.179055
Cluster-26447.104808		Cluster-26447.94836
Cluster-26447.106874		Cluster-26447.87734
Cluster-5802.1		Cluster-26447.106358
Cluster-26447.100787		Cluster-26447.121136
Cluster-7065.1		Cluster-26447.113754
Cluster-26447.104053		Cluster-26447.68365
Cluster-26447.165532		Cluster-26447.120021
Cluster-26447.177755		Cluster-26447.99082
Cluster-26447.19582		Cluster-26447.105216
Cluster-26447.4706		Cluster-26447.76891
Cluster-26447.107247		Cluster-26447.103229
Cluster-26447.128013		Cluster-26447.113954
Cluster-26447.99395		Cluster-26447.132941
Cluster-26447.177601		Cluster-26447.105197
Cluster-26447.175794		Cluster-26447.22436
Cluster-26447.133389		Cluster-26447.93362
Cluster-26447.99365		Cluster-26447.5400
Cluster-26447.75783		Cluster-26447.90235
Cluster-26447.164784		Cluster-26447.107194
Cluster-26447.200402		Cluster-26447.129330
Cluster-26447.52557		Cluster-26447.143020
Cluster-26447.110976		Cluster-26447.94158
Cluster-26447.66708		Cluster-26447.31902
Cluster-26447.169440		Cluster-26447.92313
Cluster-26447.18686		Cluster-26447.112384
Cluster-26447.35213		Cluster-26447.60918
Cluster-26447.132140		Cluster-26447.88514
Cluster-26447.198297		Cluster-26447.136181
Cluster-26447.186286		Cluster-26447.85634
Cluster-26447.114733		Cluster-26447.166350
Cluster-26447.142868		Cluster-26447.121310
Cluster-26447.28228		Cluster-26447.58617
Cluster-26447.107273		Cluster-26447.87835
Cluster-26447.95667		Cluster-26447.126361
Cluster-26447.45461		Cluster-26447.123025
Cluster-26447.29214		Cluster-26447.97890
Cluster-26447.167225		Cluster-26447.137336
Cluster-26447.211762		Cluster-26447.139758
Cluster-26447.82462		Cluster-26447.90703
Cluster-26447.98620		Cluster-26447.117711
Cluster-26447.24098		Cluster-26447.124494
Cluster-26447.55200		Cluster-26447.132894
Cluster-26447.107463		Cluster-26447.58447
Cluster-26447.112441		Cluster-26447.145387
Cluster-26447.6211		Cluster-26447.124015
Cluster-26447.160998		Cluster-26447.191819
Cluster-26447.18696		Cluster-26447.126018
Cluster-26447.72685		Cluster-26447.176217
Cluster-26447.126829		Cluster-26447.134144
Cluster-26447.209653		Cluster-26447.58559
Cluster-26447.198240
Cluster-26447.141024
Cluster-26447.201479
Cluster-26447.89531
Cluster-26447.143154
Cluster-26447.101104
Cluster-26447.106189
Cluster-28431.1
Cluster-26447.159194
Cluster-26447.142869
Cluster-1883.0
Cluster-26447.125113
Cluster-26447.81582
Cluster-26447.48918
Cluster-26447.19609
Cluster-26447.67421
Cluster-26447.64205
Cluster-26447.111873
Cluster-26447.157069
Cluster-26447.3512
Cluster-26447.162011
Cluster-26447.40399
Cluster-26447.102291
Cluster-26447.89895
Cluster-3690.2
Cluster-26447.151853
Cluster-26447.93812
Cluster-26447.62850
Cluster-18934.1
Cluster-26447.174961
Cluster-26447.145517
Cluster-26447.147049
Cluster-26447.134463
Cluster-26447.109987
Cluster-26447.39740
Cluster-26447.91033
Cluster-26447.68762
Cluster-26447.102287
Cluster-26447.18422
Cluster-26447.6380
Cluster-26447.6610
Cluster-26447.133006
Cluster-26447.57678
Cluster-26447.99162
Cluster-26447.151145
Cluster-26447.69633
Cluster-26447.151878
Cluster-26447.131163
Cluster-26447.116787
Cluster-26447.183178
Cluster-26447.79653
Cluster-26447.145588
Cluster-26447.104724
Cluster-26447.13173
Cluster-32523.1
Cluster-26447.18539
Cluster-26447.19613
Cluster-26447.7615
Cluster-26447.167047
Cluster-26447.44487
Cluster-26447.179741
Cluster-26447.8538
Cluster-26447.108086
Cluster-26447.177548
Cluster-26447.45530
Cluster-26447.119529
Cluster-26447.205569
Cluster-26447.75318
Cluster-26447.17720
Cluster-26447.107734
Cluster-26447.83871
Cluster-26447.141943
Cluster-26447.70176
Cluster-26447.106378
Cluster-26447.78618
Cluster-26447.15114
Cluster-26447.162992
Cluster-26447.61413
Cluster-26447.144176
Cluster-5580.0
Cluster-26447.198091
Cluster-26447.38453
Cluster-26447.2604
Cluster-26447.61853
Cluster-26447.130862
Cluster-26447.115812
Cluster-26447.73439
Cluster-26447.13966
Cluster-26447.194717
Cluster-26447.38891
Cluster-26447.164558
Cluster-26447.16999
Cluster-26447.177105
Cluster-26447.72323
Cluster-26447.153008
Cluster-26447.49857
Cluster-26447.71774
Cluster-26447.109211
Cluster-26447.125093
Cluster-26447.75949
Cluster-26447.197888
Cluster-26447.58776
Cluster-26447.142303
Cluster-26447.155211
Cluster-26447.111545
Cluster-26447.135085
Cluster-26447.189426
Cluster-26447.171413
Cluster-19832.3
Cluster-26447.130605
Cluster-26447.200987
Cluster-18173.0
Cluster-26447.141555
Cluster-26447.15030
Cluster-22740.0
Cluster-26447.210024
Cluster-26447.108906
Cluster-26447.35739
Cluster-26447.131300
Cluster-26447.192004
Cluster-26447.138973
Cluster-26447.102958
Cluster-26447.107578
Cluster-26447.177683
Cluster-26447.120794
Cluster-26447.26892
Cluster-26447.57909
Cluster-26447.100390
Cluster-26447.18116
Cluster-26447.145914
Cluster-26447.148310
Cluster-26447.92402
Cluster-26447.184057
Cluster-26447.4679
Cluster-26447.52762
Cluster-26447.10417
Cluster-26447.132100
Cluster-26447.4034
Cluster-26447.171946
Cluster-26447.180836
Cluster-26447.198243
Cluster-26447.63396
Cluster-26447.127461
Cluster-26447.79641
Cluster-26447.87880
Cluster-26447.151192
Cluster-26447.64495
Cluster-26447.16301
Cluster-26447.201339
Cluster-26447.3664
Cluster-26447.152005
Cluster-26447.85629
Cluster-26447.125483
Cluster-26447.13126
Cluster-26447.128326
Cluster-26447.135777
Cluster-26447.73076
Cluster-26447.137881
Cluster-26447.22207
Cluster-26447.174626
Cluster-26447.9110
Cluster-26447.3879
Cluster-26447.210443
Cluster-26447.87492
Cluster-26447.37444
Cluster-26447.7139
Cluster-26447.198808
