# Supplementary material for: Differentially expressed genes related to oxidoreductase activity and glutathione metabolism underlying the adaptation of Phragmites australis from the salt marsh in the Yellow River Delta, China
Source: PeerJ. 2020 Oct 2;8:e10024. doi: 10.7717/peerj.10024 (PMC7537617; doi:10.7717/peerj.10024)
Supplement: Dataset S3 — GO_accession is the ID of GO accession. Description means the description of Term_type. Over_represented pValue is the Pvalue of GO enrichment analysis. Corrected_pValue means the corrected Pvalue. DEG_item is the number of DEGs related to the GO term. DEG_list is the number of DEGs in the GO annotations. Bg_item is the number of background genes related to the GO term. Bg_list means the number of all background genes in the GO annotations. T0 is the tidal reed with 0 mmol/L NaCl treatment, and T300 is the tidal reed with 300 mmol/L NaCl treatment. [file peerj-08-10024-s013.xlsx]

## Sheet: T300vsT0_up_GOEnrichment
Dataset S3. The up-regulated GO enrichment of T300 vs T0. GO_accession is the ID of GO accession. Description means the description of Term_type. Over_represented pValue is the Pvalue of GO enrichment analysis. Corrected_pValue means the corrected Pvalue. DEG_item is the number of DEGs related to the GO term. DEG_list is the number of DEGs in the GO annotations. Bg_item is the number of backgroun…
GO_accession	Description	Term_type	Over_represented_pValue	Corrected_pValue	DEG_item	DEG_list	Bg_item	Bg_list	Gene_names
GO:0016491	oxidoreductase activity	molecular_function	1.2131e-07	0.00061444	136	966	11372	126097	Cluster-26447.111620,Cluster-26447.204734,Cluster-26447.95407,Cluster-26447.9735,Cluster-26447.56410,Cluster-26447.95406,Cluster-26447.165876,Cluster-26447.155054,Cluster-26447.48824,Cluster-26447.140660,Cluster-26447.77676,Cluster-26447.96780,Cluster-26447.146841,Cluster-26447.83904,Cluster-26447.159084,Cluster-26447.77096,Cluster-26447.97798,Cluster-26447.142803,Cluster-26447.57664,Cluster-2644…
GO:0019385	methanogenesis, from acetate	biological_process	6.8724e-06	0.017404	4	966	13	126097	Cluster-26447.155056,Cluster-26447.155053,Cluster-26447.155054,Cluster-26447.155043
GO:0055114	oxidation-reduction process	biological_process	1.0912e-05	0.018424	129	966	11374	126097	Cluster-26447.77281,Cluster-26447.12358,Cluster-26447.109603,Cluster-26447.18551,Cluster-26447.115132,Cluster-26447.204994,Cluster-26447.99447,Cluster-26447.57657,Cluster-4272.5,Cluster-26447.9847,Cluster-26447.57660,Cluster-26447.107517,Cluster-26447.205596,Cluster-26447.153858,Cluster-26447.44385,Cluster-26447.77681,Cluster-26447.117840,Cluster-26447.110207,Cluster-26447.167600,Cluster-26447.14…
GO:0008746	NAD(P)+ transhydrogenase activity	molecular_function	5.09e-05	0.042968	4	966	20	126097	Cluster-26447.155054,Cluster-26447.155043,Cluster-26447.155056,Cluster-26447.155053
GO:0008750	NAD(P)+ transhydrogenase (AB-specific) activity	molecular_function	5.09e-05	0.042968	4	966	20	126097	Cluster-26447.155056,Cluster-26447.155053,Cluster-26447.155054,Cluster-26447.155043
GO:0016652	oxidoreductase activity, acting on NAD(P)H, NAD(P) as acceptor	molecular_function	5.09e-05	0.042968	4	966	20	126097	Cluster-26447.155053,Cluster-26447.155056,Cluster-26447.155043,Cluster-26447.155054
GO:0050662	coenzyme binding	molecular_function	7.6507e-05	0.0514	47	966	3166	126097	Cluster-26447.155053,Cluster-26447.204570,Cluster-26447.155056,Cluster-26447.118364,Cluster-26447.148200,Cluster-26447.12515,Cluster-26447.724,Cluster-26447.64869,Cluster-26447.57664,Cluster-26447.112768,Cluster-26447.60729,Cluster-26447.40760,Cluster-26447.91395,Cluster-26447.110207,Cluster-26447.117840,Cluster-26447.98682,Cluster-26447.21121,Cluster-26447.130231,Cluster-26447.155076,Cluster-264…
GO:0043531	ADP binding	molecular_function	8.1185e-05	0.0514	28	966	1469	126097	Cluster-26447.205794,Cluster-26447.150438,Cluster-9264.0,Cluster-26447.40233,Cluster-26447.77645,Cluster-26447.190731,Cluster-26447.65687,Cluster-26447.183831,Cluster-26447.184313,Cluster-2195.0,Cluster-26447.177709,Cluster-1202.1,Cluster-26447.130453,Cluster-26447.65064,Cluster-26447.159203,Cluster-26447.209279,Cluster-26447.207214,Cluster-21685.4,Cluster-26447.156490,Cluster-11684.0,Cluster-264…
GO:0048037	cofactor binding	molecular_function	0.0002183	0.12285	53	966	3912	126097	Cluster-26447.80998,Cluster-26447.185494,Cluster-26447.175970,Cluster-26447.39092,Cluster-26447.140660,Cluster-26447.158588,Cluster-26447.123064,Cluster-26447.155043,Cluster-26447.57657,Cluster-26447.100703,Cluster-26447.95407,Cluster-26447.204994,Cluster-26447.40528,Cluster-26447.165876,Cluster-26447.95406,Cluster-26447.12358,Cluster-26447.155054,Cluster-26447.48824,Cluster-26447.42067,Cluster-2…
GO:0080019	fatty-acyl-CoA reductase (alcohol-forming) activity	molecular_function	0.00036843	0.17855	5	966	59	126097	Cluster-26447.8574,Cluster-26447.8565,Cluster-26447.61261,Cluster-26447.198821,Cluster-26447.33566
GO:0019015	viral genome	cellular_component	0.00040702	0.17855	3	966	16	126097	Cluster-26447.120331,Cluster-26447.93958,Cluster-26447.204320
GO:0000166	nucleotide binding	molecular_function	0.00045826	0.17855	222	966	20975	126097	Cluster-26447.177505,Cluster-26447.46077,Cluster-26447.176793,Cluster-26447.141050,Cluster-26447.130453,Cluster-26447.173016,Cluster-26447.57307,Cluster-26447.18331,Cluster-26447.183831,Cluster-26447.120306,Cluster-26447.91395,Cluster-26447.75347,Cluster-26447.72770,Cluster-26447.203,Cluster-26447.148206,Cluster-31356.0,Cluster-26447.71659,Cluster-26447.12321,Cluster-26447.74407,Cluster-26447.119…
GO:1901265	nucleoside phosphate binding	molecular_function	0.00045826	0.17855	222	966	20975	126097	Cluster-26447.3666,Cluster-26447.112768,Cluster-26447.105017,Cluster-26447.40760,Cluster-26447.60729,Cluster-26447.58449,Cluster-26447.115578,Cluster-26447.164716,Cluster-26447.136982,Cluster-26447.155053,Cluster-26447.159125,Cluster-26447.191833,Cluster-26447.28606,Cluster-26447.142264,Cluster-26447.206350,Cluster-26447.11482,Cluster-12542.0,Cluster-26447.62280,Cluster-26447.58690,Cluster-26447.…
GO:0036094	small molecule binding	molecular_function	0.00055528	0.20089	226	966	21514	126097	Cluster-26447.156632,Cluster-9264.0,Cluster-26447.100153,Cluster-26447.190731,Cluster-26447.105259,Cluster-26447.12358,Cluster-26447.67181,Cluster-4272.5,Cluster-2195.0,Cluster-26447.144958,Cluster-26447.207287,Cluster-26447.118735,Cluster-26447.125274,Cluster-26447.85837,Cluster-26447.209390,Cluster-26447.9847,Cluster-26447.156147,Cluster-26447.179565,Cluster-26447.12934,Cluster-26447.207213,Clu…
GO:0030976	thiamine pyrophosphate binding	molecular_function	0.00091295	0.24223	7	966	166	126097	Cluster-26447.155043,Cluster-26447.48824,Cluster-26447.155054,Cluster-26447.175970,Cluster-26447.155053,Cluster-26447.155056,Cluster-26447.40528
GO:0006468	protein phosphorylation	biological_process	0.0010283	0.24223	93	966	7935	126097	Cluster-26447.179601,Cluster-26447.37225,Cluster-26447.148206,Cluster-26447.203,Cluster-26447.136985,Cluster-26447.1433,Cluster-26447.141050,Cluster-26447.66288,Cluster-26447.176793,Cluster-26447.177505,Cluster-26447.18331,Cluster-26447.177865,Cluster-26447.133824,Cluster-26447.57307,Cluster-26447.173016,Cluster-26447.201669,Cluster-26447.82299,Cluster-26447.65167,Cluster-26447.206523,Cluster-264…
GO:0003854	3-beta-hydroxy-delta5-steroid dehydrogenase activity	molecular_function	0.0010521	0.24223	12	966	544	126097	Cluster-26447.53809,Cluster-26447.21121,Cluster-26447.39092,Cluster-26447.204570,Cluster-26447.83904,Cluster-26447.12358,Cluster-26447.57660,Cluster-26447.165876,Cluster-26447.112768,Cluster-26447.57664,Cluster-26447.57657,Cluster-26447.204994
GO:0008207	C21-steroid hormone metabolic process	biological_process	0.0010521	0.24223	12	966	544	126097	Cluster-26447.112768,Cluster-26447.165876,Cluster-26447.204994,Cluster-26447.57657,Cluster-26447.57664,Cluster-26447.83904,Cluster-26447.204570,Cluster-26447.57660,Cluster-26447.12358,Cluster-26447.21121,Cluster-26447.39092,Cluster-26447.53809
GO:0008209	androgen metabolic process	biological_process	0.0010521	0.24223	12	966	544	126097	Cluster-26447.204994,Cluster-26447.57657,Cluster-26447.57664,Cluster-26447.112768,Cluster-26447.165876,Cluster-26447.57660,Cluster-26447.12358,Cluster-26447.83904,Cluster-26447.204570,Cluster-26447.21121,Cluster-26447.39092,Cluster-26447.53809
GO:0008210	estrogen metabolic process	biological_process	0.0010521	0.24223	12	966	544	126097	Cluster-26447.12358,Cluster-26447.57660,Cluster-26447.204570,Cluster-26447.83904,Cluster-26447.57664,Cluster-26447.57657,Cluster-26447.204994,Cluster-26447.165876,Cluster-26447.112768,Cluster-26447.53809,Cluster-26447.21121,Cluster-26447.39092
GO:0016229	steroid dehydrogenase activity	molecular_function	0.0010521	0.24223	12	966	544	126097	Cluster-26447.53809,Cluster-26447.21121,Cluster-26447.39092,Cluster-26447.57660,Cluster-26447.12358,Cluster-26447.83904,Cluster-26447.204570,Cluster-26447.204994,Cluster-26447.57664,Cluster-26447.57657,Cluster-26447.112768,Cluster-26447.165876
GO:0033764	steroid dehydrogenase activity, acting on the CH-OH group of donors, NAD or NADP as acceptor	molecular_function	0.0010521	0.24223	12	966	544	126097	Cluster-26447.204994,Cluster-26447.57657,Cluster-26447.57664,Cluster-26447.112768,Cluster-26447.165876,Cluster-26447.12358,Cluster-26447.57660,Cluster-26447.83904,Cluster-26447.204570,Cluster-26447.21121,Cluster-26447.39092,Cluster-26447.53809
GO:0006083	acetate metabolic process	biological_process	0.0011501	0.25226	4	966	51	126097	Cluster-26447.155043,Cluster-26447.155054,Cluster-26447.155053,Cluster-26447.155056
GO:0016616	oxidoreductase activity, acting on the CH-OH group of donors, NAD or NADP as acceptor	molecular_function	0.0011953	0.25226	28	966	1847	126097	Cluster-26447.113958,Cluster-26447.155076,Cluster-26447.9847,Cluster-26447.204570,Cluster-26447.83904,Cluster-26447.57660,Cluster-26447.148200,Cluster-26447.56669,Cluster-26447.109452,Cluster-26447.153858,Cluster-26447.724,Cluster-26447.165876,Cluster-26447.112768,Cluster-26447.57664,Cluster-26447.57657,Cluster-26447.204994,Cluster-26447.162961,Cluster-26447.42067,Cluster-26447.91395,Cluster-2644…
GO:0030554	adenyl nucleotide binding	molecular_function	0.0012822	0.25977	182	966	16990	126097	Cluster-26447.46077,Cluster-26447.176793,Cluster-26447.177505,Cluster-26447.130453,Cluster-26447.141050,Cluster-26447.57307,Cluster-26447.173016,Cluster-26447.120306,Cluster-26447.18331,Cluster-26447.183831,Cluster-26447.75347,Cluster-26447.203,Cluster-26447.148206,Cluster-26447.71659,Cluster-31356.0,Cluster-26447.74407,Cluster-26447.119537,Cluster-26447.12321,Cluster-26447.150239,Cluster-26447.1…
GO:0032559	adenyl ribonucleotide binding	molecular_function	0.0013405	0.26114	181	966	16879	126097	Cluster-26447.170532,Cluster-26447.84540,Cluster-26447.209963,Cluster-26447.134629,Cluster-26447.178802,Cluster-26447.1432,Cluster-26447.177709,Cluster-936.1,Cluster-26447.66120,Cluster-26447.146217,Cluster-26447.12299,Cluster-26447.118800,Cluster-26447.82222,Cluster-26447.19284,Cluster-26447.113900,Cluster-26447.58613,Cluster-26447.129960,Cluster-1093.5,Cluster-26447.113791,Cluster-26447.58618,C…
GO:0043461	proton-transporting ATP synthase complex assembly	biological_process	0.0019926	0.34311	2	966	10	126097	Cluster-26447.131610,Cluster-26447.109529
GO:0070272	proton-transporting ATP synthase complex biogenesis	biological_process	0.0019926	0.34311	2	966	10	126097	Cluster-26447.131610,Cluster-26447.109529
GO:0004672	protein kinase activity	molecular_function	0.0020163	0.34311	98	966	8503	126097	Cluster-26447.154770,Cluster-26447.209390,Cluster-26447.87827,Cluster-26447.11275,Cluster-26447.204132,Cluster-26447.156147,Cluster-26447.56934,Cluster-26447.12934,Cluster-26447.117613,Cluster-26447.13021,Cluster-26447.41274,Cluster-26447.102122,Cluster-26447.1434,Cluster-26447.205596,Cluster-26447.99074,Cluster-26447.178801,Cluster-26447.37339,Cluster-26447.174995,Cluster-26447.156632,Cluster-26…
GO:0050661	NADP binding	molecular_function	0.0020323	0.34311	9	966	337	126097	Cluster-26447.153858,Cluster-26447.155043,Cluster-26447.109452,Cluster-26447.155056,Cluster-26447.185494,Cluster-26447.60729,Cluster-26447.155054,Cluster-26447.155053,Cluster-26447.112768
GO:0072351	tricarboxylic acid biosynthetic process	biological_process	0.0021139	0.34539	3	966	32	126097	Cluster-26447.96215,Cluster-26447.97817,Cluster-26447.127427
GO:0005506	iron ion binding	molecular_function	0.0024087	0.3512	23	966	1510	126097	Cluster-26447.180078,Cluster-26447.65262,Cluster-26447.34651,Cluster-26447.199707,Cluster-26447.204734,Cluster-26447.176793,Cluster-26447.180072,Cluster-26447.96655,Cluster-1202.1,Cluster-26447.17196,Cluster-26447.42727,Cluster-27210.2,Cluster-26447.180071,Cluster-26447.203494,Cluster-26447.564,Cluster-26447.173447,Cluster-26447.41840,Cluster-26447.146841,Cluster-26447.32493,Cluster-26447.211581,…
GO:0015948	methanogenesis	biological_process	0.0024269	0.3512	6	966	163	126097	Cluster-26447.155053,Cluster-26447.113672,Cluster-26447.120331,Cluster-26447.155056,Cluster-26447.155043,Cluster-26447.155054
GO:0015975	energy derivation by oxidation of reduced inorganic compounds	biological_process	0.0024269	0.3512	6	966	163	126097	Cluster-26447.120331,Cluster-26447.155056,Cluster-26447.155053,Cluster-26447.113672,Cluster-26447.155054,Cluster-26447.155043
GO:0043447	alkane biosynthetic process	biological_process	0.0024269	0.3512	6	966	163	126097	Cluster-26447.155054,Cluster-26447.155043,Cluster-26447.155056,Cluster-26447.120331,Cluster-26447.155053,Cluster-26447.113672
GO:0009061	anaerobic respiration	biological_process	0.0027562	0.38779	6	966	170	126097	Cluster-26447.120331,Cluster-26447.155056,Cluster-26447.155053,Cluster-26447.113672,Cluster-26447.155054,Cluster-26447.155043
GO:1901681	sulfur compound binding	molecular_function	0.0034247	0.45453	9	966	333	126097	Cluster-26447.155043,Cluster-26447.84141,Cluster-26447.175970,Cluster-26447.125216,Cluster-26447.155056,Cluster-26447.48824,Cluster-26447.155054,Cluster-26447.155053,Cluster-26447.40528
GO:0009020	tRNA (guanosine-2'-O-)-methyltransferase activity	molecular_function	0.003545	0.45453	2	966	10	126097	Cluster-26447.75347,Cluster-26447.57410
GO:0035792	other organism postsynaptic membrane	cellular_component	0.0035486	0.45453	2	966	10	126097	Cluster-26447.48425,Cluster-26447.48424
GO:0016614	oxidoreductase activity, acting on CH-OH group of donors	molecular_function	0.0035895	0.45453	28	966	1963	126097	Cluster-26447.53809,Cluster-26447.123064,Cluster-26447.39092,Cluster-26447.21121,Cluster-26447.98682,Cluster-26447.91395,Cluster-26447.162961,Cluster-26447.117840,Cluster-26447.110207,Cluster-26447.42067,Cluster-26447.60729,Cluster-26447.12358,Cluster-26447.112768,Cluster-26447.165876,Cluster-26447.204994,Cluster-26447.57657,Cluster-26447.57664,Cluster-26447.153858,Cluster-26447.724,Cluster-26447…
GO:0034754	cellular hormone metabolic process	biological_process	0.0040165	0.48155	12	966	608	126097	Cluster-26447.21121,Cluster-26447.39092,Cluster-26447.53809,Cluster-26447.112768,Cluster-26447.165876,Cluster-26447.204994,Cluster-26447.57664,Cluster-26447.57657,Cluster-26447.83904,Cluster-26447.204570,Cluster-26447.12358,Cluster-26447.57660
GO:0002097	tRNA wobble base modification	biological_process	0.0042988	0.48155	3	966	34	126097	Cluster-26447.181385,Cluster-26447.37937,Cluster-26447.200976
GO:0002098	tRNA wobble uridine modification	biological_process	0.0042988	0.48155	3	966	34	126097	Cluster-26447.181385,Cluster-26447.37937,Cluster-26447.200976
GO:0010817	regulation of hormone levels	biological_process	0.0044386	0.48155	12	966	618	126097	Cluster-26447.204570,Cluster-26447.83904,Cluster-26447.57660,Cluster-26447.12358,Cluster-26447.165876,Cluster-26447.112768,Cluster-26447.57664,Cluster-26447.57657,Cluster-26447.204994,Cluster-26447.53809,Cluster-26447.21121,Cluster-26447.39092
GO:0042445	hormone metabolic process	biological_process	0.0044386	0.48155	12	966	618	126097	Cluster-26447.204570,Cluster-26447.83904,Cluster-26447.57660,Cluster-26447.12358,Cluster-26447.165876,Cluster-26447.112768,Cluster-26447.57664,Cluster-26447.57657,Cluster-26447.204994,Cluster-26447.53809,Cluster-26447.21121,Cluster-26447.39092
GO:0006050	mannosamine metabolic process	biological_process	0.0045636	0.48155	3	966	44	126097	Cluster-26447.1470,Cluster-26447.98682,Cluster-26447.8416
GO:0006051	N-acetylmannosamine metabolic process	biological_process	0.0045636	0.48155	3	966	44	126097	Cluster-26447.8416,Cluster-26447.98682,Cluster-26447.1470
GO:0047465	N-acylglucosamine-6-phosphate 2-epimerase activity	molecular_function	0.0045636	0.48155	3	966	44	126097	Cluster-26447.1470,Cluster-26447.98682,Cluster-26447.8416
GO:0019842	vitamin binding	molecular_function	0.004688	0.48459	8	966	293	126097	Cluster-26447.155043,Cluster-26447.84141,Cluster-26447.175970,Cluster-26447.155056,Cluster-26447.48824,Cluster-26447.155054,Cluster-26447.155053,Cluster-26447.40528
GO:0003824	catalytic activity	molecular_function	0.0053079	0.53274	515	966	58799	126097	Cluster-26447.124528,Cluster-26447.135089,Cluster-26447.88210,Cluster-26447.42727,Cluster-26447.102199,Cluster-26447.120331,Cluster-26447.115264,Cluster-26447.9012,Cluster-26447.110145,Cluster-26447.58449,Cluster-26447.204930,Cluster-26447.216592,Cluster-26447.40114,Cluster-26447.206350,Cluster-26447.142264,Cluster-26447.1470,Cluster-26447.28606,Cluster-26447.933,Cluster-26447.108565,Cluster-2644…
GO:0034227	tRNA thio-modification	biological_process	0.0054376	0.53274	3	966	39	126097	Cluster-26447.37937,Cluster-26447.200976,Cluster-26447.181385
GO:0020037	heme binding	molecular_function	0.0054694	0.53274	22	966	1595	126097	Cluster-26447.203494,Cluster-26447.180071,Cluster-26447.180581,Cluster-27210.2,Cluster-26447.146841,Cluster-26447.173447,Cluster-26447.41840,Cluster-26447.116962,Cluster-26447.134519,Cluster-26447.211581,Cluster-26447.32493,Cluster-26447.34651,Cluster-26447.65262,Cluster-26447.134629,Cluster-26447.180078,Cluster-26447.199707,Cluster-26447.204734,Cluster-26447.190892,Cluster-26447.96655,Cluster-26…
GO:0016772	transferase activity, transferring phosphorus-containing groups	molecular_function	0.00567	0.54186	146	966	13987	126097	Cluster-26447.27576,Cluster-26447.155828,Cluster-26447.203494,Cluster-26447.176499,Cluster-26447.133826,Cluster-26447.86266,Cluster-26447.93043,Cluster-26447.65687,Cluster-26447.40378,Cluster-26447.33049,Cluster-26447.81554,Cluster-1202.1,Cluster-26447.146597,Cluster-26447.156147,Cluster-26447.209390,Cluster-26447.204182,Cluster-26447.205596,Cluster-26447.102122,Cluster-26447.1434,Cluster-26447.4…
GO:0001882	nucleoside binding	molecular_function	0.0058645	0.55007	187	966	18284	126097	Cluster-26447.65687,Cluster-26447.40378,Cluster-26447.150438,Cluster-26447.105,Cluster-1202.1,Cluster-26447.86962,Cluster-26447.81554,Cluster-26447.77712,Cluster-26447.86969,Cluster-26447.146597,Cluster-26447.155828,Cluster-26447.109788,Cluster-26447.27576,Cluster-21685.4,Cluster-26447.133826,Cluster-26447.209279,Cluster-26447.180176,Cluster-26447.86266,Cluster-26447.93043,Cluster-26447.46051,Clu…
GO:0002143	tRNA wobble position uridine thiolation	biological_process	0.0062764	0.578	2	966	10	126097	Cluster-26447.181385,Cluster-26447.37937
GO:0045454	cell redox homeostasis	biological_process	0.0065254	0.5902	11	966	675	126097	Cluster-26447.88215,Cluster-26447.123161,Cluster-26447.113291,Cluster-26447.167194,Cluster-26447.77676,Cluster-26447.33592,Cluster-26447.33049,Cluster-26447.111620,Cluster-26447.35718,Cluster-26447.95406,Cluster-26447.100182
GO:0015947	methane metabolic process	biological_process	0.0075952	0.62707	6	966	217	126097	Cluster-26447.120331,Cluster-26447.155056,Cluster-26447.155053,Cluster-26447.113672,Cluster-26447.155054,Cluster-26447.155043
GO:0043446	cellular alkane metabolic process	biological_process	0.0075952	0.62707	6	966	217	126097	Cluster-26447.155054,Cluster-26447.155043,Cluster-26447.155056,Cluster-26447.120331,Cluster-26447.113672,Cluster-26447.155053
GO:0017076	purine nucleotide binding	molecular_function	0.0077226	0.62707	187	966	18443	126097	Cluster-26447.140660,Cluster-26447.121272,Cluster-26447.184313,Cluster-26447.156579,Cluster-26447.205794,Cluster-26447.56410,Cluster-26447.163928,Cluster-26447.40528,Cluster-26447.48824,Cluster-26447.185243,Cluster-26447.147331,Cluster-26447.56934,Cluster-26447.103862,Cluster-26447.13021,Cluster-26447.117613,Cluster-26447.190134,Cluster-26447.117280,Cluster-26447.99074,Cluster-26447.37339,Cluster…
GO:0044163	host cytoskeleton	cellular_component	0.0080249	0.62707	3	966	49	126097	Cluster-26447.48972,Cluster-26447.48975,Cluster-26447.48974
GO:0075519	microtubule-dependent intracellular transport of viral material	biological_process	0.0080249	0.62707	3	966	49	126097	Cluster-26447.48972,Cluster-26447.48975,Cluster-26447.48974
GO:0075521	microtubule-dependent intracellular transport of viral material towards nucleus	biological_process	0.0080249	0.62707	3	966	49	126097	Cluster-26447.48974,Cluster-26447.48972,Cluster-26447.48975
GO:0075606	transport of viral material towards nucleus	biological_process	0.0080249	0.62707	3	966	49	126097	Cluster-26447.48975,Cluster-26447.48972,Cluster-26447.48974
GO:0016705	oxidoreductase activity, acting on paired donors, with incorporation or reduction of molecular oxygen	molecular_function	0.0080562	0.62707	21	966	1456	126097	Cluster-26447.32493,Cluster-26447.211581,Cluster-26447.134519,Cluster-27210.2,Cluster-26447.180071,Cluster-26447.203494,Cluster-26447.173447,Cluster-26447.41840,Cluster-26447.146841,Cluster-26447.180072,Cluster-26447.96655,Cluster-26447.123064,Cluster-1202.1,Cluster-26447.17196,Cluster-26447.185494,Cluster-26447.42727,Cluster-26447.180078,Cluster-26447.65262,Cluster-26447.34651,Cluster-26447.2047…
GO:0046906	tetrapyrrole binding	molecular_function	0.0081008	0.62707	22	966	1655	126097	Cluster-26447.42727,Cluster-26447.17196,Cluster-26447.190892,Cluster-26447.96655,Cluster-26447.180072,Cluster-26447.204734,Cluster-26447.199707,Cluster-26447.65262,Cluster-26447.34651,Cluster-26447.180078,Cluster-26447.134629,Cluster-26447.211581,Cluster-26447.134519,Cluster-26447.116962,Cluster-26447.32493,Cluster-26447.146841,Cluster-26447.41840,Cluster-26447.173447,Cluster-26447.180071,Cluster…
GO:0097367	carbohydrate derivative binding	molecular_function	0.0081711	0.62707	190	966	18796	126097	Cluster-26447.105259,Cluster-26447.190731,Cluster-26447.12358,Cluster-26447.100153,Cluster-26447.156632,Cluster-9264.0,Cluster-26447.118735,Cluster-26447.125274,Cluster-26447.144958,Cluster-26447.207287,Cluster-26447.67181,Cluster-4272.5,Cluster-2195.0,Cluster-26447.156147,Cluster-26447.85837,Cluster-26447.209390,Cluster-26447.178801,Cluster-26447.204182,Cluster-26447.207213,Cluster-26447.102122,…
GO:0043168	anion binding	molecular_function	0.008383	0.63373	209	966	20970	126097	Cluster-26447.60113,Cluster-26447.46051,Cluster-26447.180176,Cluster-26447.64869,Cluster-26447.149113,Cluster-26447.86266,Cluster-26447.93043,Cluster-26447.110484,Cluster-26447.27576,Cluster-26447.109788,Cluster-26447.155828,Cluster-26447.128951,Cluster-21685.4,Cluster-26447.133826,Cluster-26447.209279,Cluster-26447.204812,Cluster-26447.86962,Cluster-26447.81554,Cluster-1202.1,Cluster-26447.86969…
GO:0001883	purine nucleoside binding	molecular_function	0.0088097	0.63417	185	966	18256	126097	Cluster-26447.20699,Cluster-26447.216592,Cluster-26447.155419,Cluster-26447.118068,Cluster-26447.113937,Cluster-26447.65361,Cluster-26447.62280,Cluster-26447.11482,Cluster-12542.0,Cluster-26447.206350,Cluster-26447.191833,Cluster-26447.159125,Cluster-26447.28606,Cluster-26447.142264,Cluster-26447.164716,Cluster-26447.136982,Cluster-26447.40760,Cluster-26447.115578,Cluster-26447.58449,Cluster-2644…
GO:0032549	ribonucleoside binding	molecular_function	0.0088097	0.63417	185	966	18256	126097	Cluster-26447.12321,Cluster-26447.119537,Cluster-26447.74407,Cluster-31356.0,Cluster-26447.71659,Cluster-26447.150239,Cluster-26447.65064,Cluster-26447.175908,Cluster-26447.127585,Cluster-26447.201669,Cluster-26447.122456,Cluster-26447.141050,Cluster-26447.130453,Cluster-26447.177505,Cluster-26447.176793,Cluster-26447.46077,Cluster-26447.120306,Cluster-26447.18331,Cluster-26447.183831,Cluster-264…
GO:0032550	purine ribonucleoside binding	molecular_function	0.0088097	0.63417	185	966	18256	126097	Cluster-26447.37225,Cluster-26447.136985,Cluster-26447.40233,Cluster-26447.103544,Cluster-26447.179601,Cluster-26447.158601,Cluster-26447.177865,Cluster-26447.133824,Cluster-26447.1433,Cluster-26447.66288,Cluster-26447.159203,Cluster-26447.82299,Cluster-26447.65167,Cluster-26447.206523,Cluster-26447.207214,Cluster-26447.187847,Cluster-26447.110455,Cluster-26447.84250,Cluster-26447.121922,Cluster-…
GO:0032555	purine ribonucleotide binding	molecular_function	0.0090913	0.63417	185	966	18279	126097	Cluster-26447.178802,Cluster-26447.134629,Cluster-26447.84540,Cluster-26447.209963,Cluster-26447.170532,Cluster-26447.113900,Cluster-936.1,Cluster-26447.1432,Cluster-26447.177709,Cluster-26447.66120,Cluster-26447.146217,Cluster-26447.12299,Cluster-26447.118800,Cluster-26447.19284,Cluster-26447.82222,Cluster-1093.5,Cluster-26447.129960,Cluster-26447.58613,Cluster-26447.113791,Cluster-26447.58618,C…
GO:0004859	phospholipase inhibitor activity	molecular_function	0.00914	0.63417	2	966	15	126097	Cluster-26447.74407,Cluster-26447.130453
GO:0055102	lipase inhibitor activity	molecular_function	0.00914	0.63417	2	966	15	126097	Cluster-26447.130453,Cluster-26447.74407
GO:0032553	ribonucleotide binding	molecular_function	0.011022	0.75442	186	966	18484	126097	Cluster-26447.150239,Cluster-26447.122456,Cluster-26447.65064,Cluster-26447.175908,Cluster-26447.201669,Cluster-26447.127585,Cluster-31356.0,Cluster-26447.71659,Cluster-26447.12321,Cluster-26447.119537,Cluster-26447.74407,Cluster-26447.75347,Cluster-26447.203,Cluster-26447.148206,Cluster-26447.177505,Cluster-26447.176793,Cluster-26447.46077,Cluster-26447.141050,Cluster-26447.130453,Cluster-26447.…
GO:0016773	phosphotransferase activity, alcohol group as acceptor	molecular_function	0.011348	0.76636	107	966	10084	126097	Cluster-26447.1433,Cluster-26447.130453,Cluster-26447.141050,Cluster-26447.66288,Cluster-26447.176793,Cluster-26447.177505,Cluster-26447.177865,Cluster-26447.18331,Cluster-26447.133824,Cluster-26447.57307,Cluster-26447.173016,Cluster-26447.179601,Cluster-26447.37225,Cluster-26447.148206,Cluster-26447.203,Cluster-26447.136985,Cluster-26447.48424,Cluster-26447.119537,Cluster-26447.74407,Cluster-264…
GO:0006276	plasmid maintenance	biological_process	0.01255	0.83638	3	966	62	126097	Cluster-26447.67905,Cluster-26447.48892,Cluster-26447.67906
GO:0008318	protein prenyltransferase activity	molecular_function	0.012817	0.84309	4	966	98	126097	Cluster-26447.206350,Cluster-26447.173555,Cluster-26447.92151,Cluster-26447.114501
GO:0097159	organic cyclic compound binding	molecular_function	0.013663	0.87347	368	966	40624	126097	Cluster-26447.155054,Cluster-26447.48824,Cluster-26447.204734,Cluster-26447.95407,Cluster-26447.56410,Cluster-26447.207851,Cluster-26447.163928,Cluster-26447.203505,Cluster-26447.72759,Cluster-26447.140820,Cluster-26447.119099,Cluster-26447.156490,Cluster-26447.204132,Cluster-26447.11275,Cluster-26447.146841,Cluster-26447.65281,Cluster-26447.132894,Cluster-26447.154770,Cluster-26447.37339,Cluster…
GO:1901363	heterocyclic compound binding	molecular_function	0.013663	0.87347	368	966	40624	126097	Cluster-26447.105259,Cluster-2195.0,Cluster-26447.67181,Cluster-26447.9447,Cluster-26447.144958,Cluster-26447.158588,Cluster-26447.118735,Cluster-1340.1,Cluster-26447.85837,Cluster-26447.127712,Cluster-26447.9847,Cluster-26447.167589,Cluster-26447.179565,Cluster-26447.12934,Cluster-26447.61385,Cluster-26447.102122,Cluster-26447.207213,Cluster-26447.13725,Cluster-26447.48334,Cluster-26447.105,Clus…
GO:0017134	fibroblast growth factor binding	molecular_function	0.013951	0.87347	1	966	2	126097	Cluster-26447.40233
GO:0016301	kinase activity	molecular_function	0.014162	0.87347	111	966	10525	126097	Cluster-26447.207287,Cluster-26447.184313,Cluster-4272.5,Cluster-26447.121272,Cluster-26447.125274,Cluster-26447.118735,Cluster-26447.163928,Cluster-26447.156632,Cluster-26447.105259,Cluster-26447.185243,Cluster-26447.12934,Cluster-26447.117613,Cluster-26447.190134,Cluster-26447.13021,Cluster-26447.56934,Cluster-26447.178801,Cluster-26447.174995,Cluster-26447.37339,Cluster-26447.41274,Cluster-264…
GO:0043189	H4/H2A histone acetyltransferase complex	cellular_component	0.014613	0.87347	2	966	31	126097	Cluster-748.0,Cluster-26447.107986
GO:1902562	H4 histone acetyltransferase complex	cellular_component	0.014613	0.87347	2	966	31	126097	Cluster-748.0,Cluster-26447.107986
GO:0004488	methylenetetrahydrofolate dehydrogenase (NADP+) activity	molecular_function	0.014788	0.87347	3	966	82	126097	Cluster-26447.84696,Cluster-26447.12358,Cluster-26447.118364
GO:0075733	intracellular transport of virus	biological_process	0.014831	0.87347	3	966	62	126097	Cluster-26447.48974,Cluster-26447.48972,Cluster-26447.48975
GO:1902583	multi-organism intracellular transport	biological_process	0.014831	0.87347	3	966	62	126097	Cluster-26447.48975,Cluster-26447.48972,Cluster-26447.48974
GO:0019725	cellular homeostasis	biological_process	0.015279	0.87767	14	966	1068	126097	Cluster-26447.33592,Cluster-26447.95406,Cluster-26447.100182,Cluster-26447.33049,Cluster-26447.182885,Cluster-26447.111620,Cluster-26447.35718,Cluster-26447.123161,Cluster-26447.88215,Cluster-1202.0,Cluster-1202.1,Cluster-26447.167194,Cluster-26447.77676,Cluster-26447.113291
GO:0042254	ribosome biogenesis	biological_process	0.015817	0.87767	40	966	3953	126097	Cluster-26447.174995,Cluster-26447.99213,Cluster-26447.99294,Cluster-26447.125593,Cluster-26447.156505,Cluster-26447.129937,Cluster-26447.53906,Cluster-26447.117627,Cluster-26447.156490,Cluster-26447.42104,Cluster-26447.113331,Cluster-26447.48330,Cluster-26447.45139,Cluster-26447.124497,Cluster-26447.127219,Cluster-26447.140820,Cluster-26447.122861,Cluster-26447.29217,Cluster-26447.83005,Cluster-…
GO:0030410	nicotianamine synthase activity	molecular_function	0.015903	0.87767	2	966	23	126097	Cluster-26447.97817,Cluster-26447.127427
GO:0030417	nicotianamine metabolic process	biological_process	0.015903	0.87767	2	966	23	126097	Cluster-26447.97817,Cluster-26447.127427
GO:0030418	nicotianamine biosynthetic process	biological_process	0.015903	0.87767	2	966	23	126097	Cluster-26447.127427,Cluster-26447.97817
GO:0006522	alanine metabolic process	biological_process	0.016115	0.87767	6	966	228	126097	Cluster-26447.113791,Cluster-26447.200419,Cluster-26447.115264,Cluster-26447.140660,Cluster-26447.200422,Cluster-26447.103544
GO:0009078	pyruvate family amino acid metabolic process	biological_process	0.016115	0.87767	6	966	228	126097	Cluster-26447.115264,Cluster-26447.103544,Cluster-26447.140660,Cluster-26447.200422,Cluster-26447.113791,Cluster-26447.200419
GO:0005524	ATP binding	molecular_function	0.016676	0.88879	165	966	16174	126097	Cluster-26447.1433,Cluster-26447.66288,Cluster-26447.158601,Cluster-26447.177865,Cluster-26447.133824,Cluster-26447.179601,Cluster-26447.37225,Cluster-26447.136985,Cluster-26447.103544,Cluster-26447.110455,Cluster-26447.159203,Cluster-26447.206523,Cluster-26447.65167,Cluster-26447.82299,Cluster-26447.165528,Cluster-26447.68831,Cluster-26447.63553,Cluster-26447.181705,Cluster-26447.121922,Cluster-…
GO:0000287	magnesium ion binding	molecular_function	0.017026	0.88879	13	966	811	126097	Cluster-26447.155043,Cluster-26447.175970,Cluster-26447.155056,Cluster-26447.206703,Cluster-26447.48824,Cluster-26447.69821,Cluster-26447.155828,Cluster-26447.115578,Cluster-26447.155054,Cluster-26447.206705,Cluster-26447.155053,Cluster-26447.108565,Cluster-26447.40528
GO:0051775	response to redox state	biological_process	0.017053	0.88879	2	966	27	126097	Cluster-26447.107804,Cluster-26447.107816
GO:0004425	indole-3-glycerol-phosphate synthase activity	molecular_function	0.017215	0.88879	3	966	60	126097	Cluster-26447.1470,Cluster-26447.98682,Cluster-26447.8416
GO:0006531	aspartate metabolic process	biological_process	0.01735	0.88879	5	966	177	126097	Cluster-26447.103544,Cluster-26447.140660,Cluster-26447.200422,Cluster-26447.200419,Cluster-26447.113791
GO:0003735	structural constituent of ribosome	molecular_function	0.017642	0.88879	31	966	3059	126097	Cluster-26447.117840,Cluster-26447.102600,Cluster-26447.144646,Cluster-26447.83005,Cluster-26447.62499,Cluster-26447.209963,Cluster-26447.107355,Cluster-26447.181649,Cluster-26447.91564,Cluster-26447.127219,Cluster-26447.45138,Cluster-26447.124497,Cluster-26447.105731,Cluster-26447.29217,Cluster-26447.122861,Cluster-26447.86326,Cluster-26447.140820,Cluster-26447.42104,Cluster-26447.113331,Cluster…
GO:0042255	ribosome assembly	biological_process	0.017909	0.88879	2	966	30	126097	Cluster-26447.156490,Cluster-26447.156505
GO:0042256	mature ribosome assembly	biological_process	0.017909	0.88879	2	966	30	126097	Cluster-26447.156505,Cluster-26447.156490
GO:0071804	cellular potassium ion transport	biological_process	0.018074	0.88879	7	966	314	126097	Cluster-26447.66517,Cluster-26447.22371,Cluster-26447.66043,Cluster-26447.164912,Cluster-26447.11686,Cluster-26447.207713,Cluster-26447.140126
GO:0071805	potassium ion transmembrane transport	biological_process	0.018074	0.88879	7	966	314	126097	Cluster-26447.66043,Cluster-26447.164912,Cluster-26447.66517,Cluster-26447.22371,Cluster-26447.11686,Cluster-26447.207713,Cluster-26447.140126
GO:0052652	cyclic purine nucleotide metabolic process	biological_process	0.018346	0.89347	3	966	64	126097	Cluster-26447.85633,Cluster-26447.69821,Cluster-26447.102199
GO:0030173	integral component of Golgi membrane	cellular_component	0.019159	0.89492	4	966	121	126097	Cluster-26447.43676,Cluster-26447.84191,Cluster-26447.13906,Cluster-26447.48978
GO:0031228	intrinsic component of Golgi membrane	cellular_component	0.019159	0.89492	4	966	121	126097	Cluster-26447.43676,Cluster-26447.48978,Cluster-26447.13906,Cluster-26447.84191
GO:0006535	cysteine biosynthetic process from serine	biological_process	0.019545	0.89492	2	966	23	126097	Cluster-26447.46051,Cluster-26447.46049
GO:0009001	serine O-acetyltransferase activity	molecular_function	0.019545	0.89492	2	966	23	126097	Cluster-26447.46049,Cluster-26447.46051
GO:0016412	serine O-acyltransferase activity	molecular_function	0.019545	0.89492	2	966	23	126097	Cluster-26447.46049,Cluster-26447.46051
GO:0019344	cysteine biosynthetic process	biological_process	0.019545	0.89492	2	966	23	126097	Cluster-26447.46049,Cluster-26447.46051
GO:0016310	phosphorylation	biological_process	0.019612	0.89492	109	966	10700	126097	Cluster-26447.142960,Cluster-26447.62280,Cluster-26447.27576,Cluster-26447.11482,Cluster-12542.0,Cluster-26447.206350,Cluster-26447.28606,Cluster-26447.191833,Cluster-26447.142264,Cluster-26447.133826,Cluster-26447.108565,Cluster-26447.86266,Cluster-26447.93043,Cluster-26447.20699,Cluster-26447.216592,Cluster-26447.65361,Cluster-26447.105017,Cluster-1202.1,Cluster-26447.81554,Cluster-26447.136982…
GO:0009190	cyclic nucleotide biosynthetic process	biological_process	0.021034	0.95121	3	966	70	126097	Cluster-26447.69821,Cluster-26447.102199,Cluster-26447.85633
GO:0022613	ribonucleoprotein complex biogenesis	biological_process	0.022259	0.98718	40	966	4039	126097	Cluster-26447.91562,Cluster-26447.160118,Cluster-26447.82999,Cluster-26447.46116,Cluster-26447.172844,Cluster-26447.207639,Cluster-26447.123519,Cluster-26447.86326,Cluster-26447.105731,Cluster-26447.45138,Cluster-26447.91564,Cluster-26447.181649,Cluster-26447.191579,Cluster-26447.48334,Cluster-26447.62499,Cluster-26447.33687,Cluster-26447.117840,Cluster-26447.129937,Cluster-26447.174995,Cluster-2…
GO:0004144	diacylglycerol O-acyltransferase activity	molecular_function	0.023649	0.98718	3	966	74	126097	Cluster-26447.55740,Cluster-26447.67834,Cluster-8641.3
GO:0016411	acylglycerol O-acyltransferase activity	molecular_function	0.023649	0.98718	3	966	74	126097	Cluster-8641.3,Cluster-26447.55740,Cluster-26447.67834
GO:0004834	tryptophan synthase activity	molecular_function	0.023833	0.98718	2	966	41	126097	Cluster-26447.1470,Cluster-26447.8416
GO:0022008	neurogenesis	biological_process	0.024046	0.98718	4	966	131	126097	Cluster-26447.9136,Cluster-26447.216685,Cluster-26447.208563,Cluster-26447.173511
GO:0030182	neuron differentiation	biological_process	0.024046	0.98718	4	966	131	126097	Cluster-26447.9136,Cluster-26447.173511,Cluster-26447.208563,Cluster-26447.216685
GO:0048699	generation of neurons	biological_process	0.024046	0.98718	4	966	131	126097	Cluster-26447.9136,Cluster-26447.216685,Cluster-26447.173511,Cluster-26447.208563
GO:0009129	pyrimidine nucleoside monophosphate metabolic process	biological_process	0.024947	0.98718	4	966	118	126097	Cluster-26447.165528,Cluster-26447.100182,Cluster-26447.75347,Cluster-26447.204182
GO:0009130	pyrimidine nucleoside monophosphate biosynthetic process	biological_process	0.024947	0.98718	4	966	118	126097	Cluster-26447.204182,Cluster-26447.75347,Cluster-26447.100182,Cluster-26447.165528
GO:0009157	deoxyribonucleoside monophosphate biosynthetic process	biological_process	0.024947	0.98718	4	966	118	126097	Cluster-26447.100182,Cluster-26447.165528,Cluster-26447.204182,Cluster-26447.75347
GO:0009176	pyrimidine deoxyribonucleoside monophosphate metabolic process	biological_process	0.024947	0.98718	4	966	118	126097	Cluster-26447.204182,Cluster-26447.75347,Cluster-26447.100182,Cluster-26447.165528
GO:0009177	pyrimidine deoxyribonucleoside monophosphate biosynthetic process	biological_process	0.024947	0.98718	4	966	118	126097	Cluster-26447.75347,Cluster-26447.204182,Cluster-26447.165528,Cluster-26447.100182
GO:0009221	pyrimidine deoxyribonucleotide biosynthetic process	biological_process	0.024947	0.98718	4	966	118	126097	Cluster-26447.100182,Cluster-26447.165528,Cluster-26447.204182,Cluster-26447.75347
GO:0009263	deoxyribonucleotide biosynthetic process	biological_process	0.024947	0.98718	4	966	118	126097	Cluster-26447.165528,Cluster-26447.100182,Cluster-26447.75347,Cluster-26447.204182
GO:0009265	2'-deoxyribonucleotide biosynthetic process	biological_process	0.024947	0.98718	4	966	118	126097	Cluster-26447.75347,Cluster-26447.204182,Cluster-26447.165528,Cluster-26447.100182
GO:0046385	deoxyribose phosphate biosynthetic process	biological_process	0.024947	0.98718	4	966	118	126097	Cluster-26447.204182,Cluster-26447.75347,Cluster-26447.100182,Cluster-26447.165528
GO:0009162	deoxyribonucleoside monophosphate metabolic process	biological_process	0.026327	1	4	966	121	126097	Cluster-26447.165528,Cluster-26447.100182,Cluster-26447.75347,Cluster-26447.204182
GO:0006769	nicotinamide metabolic process	biological_process	0.026875	1	4	966	131	126097	Cluster-26447.155054,Cluster-26447.155043,Cluster-26447.155056,Cluster-26447.155053
GO:0046660	female sex differentiation	biological_process	0.026911	1	3	966	84	126097	Cluster-26447.50022,Cluster-26447.75058,Cluster-26447.181705
GO:0016620	oxidoreductase activity, acting on the aldehyde or oxo group of donors, NAD or NADP as acceptor	molecular_function	0.027909	1	6	966	288	126097	Cluster-26447.61261,Cluster-26447.8565,Cluster-26447.8574,Cluster-26447.103408,Cluster-26447.33566,Cluster-26447.198821
GO:0006879	cellular iron ion homeostasis	biological_process	0.029007	1	2	966	41	126097	Cluster-1202.1,Cluster-1202.0
GO:0055072	iron ion homeostasis	biological_process	0.029007	1	2	966	41	126097	Cluster-1202.1,Cluster-1202.0
GO:0019076	viral release from host cell	biological_process	0.02971	1	4	966	135	126097	Cluster-26447.48974,Cluster-26447.48975,Cluster-26447.61385,Cluster-26447.48972
GO:0045333	cellular respiration	biological_process	0.02978	1	19	966	1372	126097	Cluster-26447.181385,Cluster-26447.206523,Cluster-26447.155053,Cluster-26447.113672,Cluster-26447.96780,Cluster-26447.37937,Cluster-26447.99074,Cluster-26447.84141,Cluster-26447.124172,Cluster-26447.155056,Cluster-26447.117840,Cluster-26447.91395,Cluster-26447.42067,Cluster-26447.155054,Cluster-26447.91523,Cluster-26447.120331,Cluster-26447.99447,Cluster-26447.155043,Cluster-26447.147762
GO:0004813	alanine-tRNA ligase activity	molecular_function	0.030001	1	3	966	76	126097	Cluster-26447.103544,Cluster-26447.140660,Cluster-26447.113791
GO:0006419	alanyl-tRNA aminoacylation	biological_process	0.030001	1	3	966	76	126097	Cluster-26447.140660,Cluster-26447.103544,Cluster-26447.113791
GO:0003968	RNA-directed RNA polymerase activity	molecular_function	0.030061	1	7	966	340	126097	Cluster-26447.119323,Cluster-26447.176499,Cluster-26447.22355,Cluster-26447.203505,Cluster-26447.10621,Cluster-26447.146706,Cluster-26447.33049
GO:0031379	RNA-directed RNA polymerase complex	cellular_component	0.030061	1	7	966	340	126097	Cluster-26447.10621,Cluster-26447.203505,Cluster-26447.22355,Cluster-26447.33049,Cluster-26447.146706,Cluster-26447.119323,Cluster-26447.176499
GO:0009820	alkaloid metabolic process	biological_process	0.030506	1	4	966	137	126097	Cluster-26447.155054,Cluster-26447.155043,Cluster-26447.155056,Cluster-26447.155053
GO:0008814	citrate CoA-transferase activity	molecular_function	0.031092	1	1	966	5	126097	Cluster-26447.206523
GO:0009346	citrate lyase complex	cellular_component	0.031092	1	1	966	5	126097	Cluster-26447.206523
GO:0018342	protein prenylation	biological_process	0.031992	1	3	966	73	126097	Cluster-26447.92151,Cluster-26447.114501,Cluster-26447.173555
GO:0097354	prenylation	biological_process	0.031992	1	3	966	73	126097	Cluster-26447.92151,Cluster-26447.114501,Cluster-26447.173555
GO:0006694	steroid biosynthetic process	biological_process	0.032489	1	12	966	830	126097	Cluster-26447.39092,Cluster-26447.21121,Cluster-26447.53809,Cluster-26447.57664,Cluster-26447.57657,Cluster-26447.204994,Cluster-26447.165876,Cluster-26447.112768,Cluster-26447.57660,Cluster-26447.12358,Cluster-26447.204570,Cluster-26447.83904
GO:0006534	cysteine metabolic process	biological_process	0.033718	1	3	966	81	126097	Cluster-26447.46049,Cluster-26447.176793,Cluster-26447.46051
GO:0008202	steroid metabolic process	biological_process	0.033789	1	12	966	837	126097	Cluster-26447.21121,Cluster-26447.39092,Cluster-26447.53809,Cluster-26447.204994,Cluster-26447.57664,Cluster-26447.57657,Cluster-26447.112768,Cluster-26447.165876,Cluster-26447.12358,Cluster-26447.57660,Cluster-26447.83904,Cluster-26447.204570
GO:0030430	host cell cytoplasm	cellular_component	0.033986	1	4	966	164	126097	Cluster-26447.142660,Cluster-26447.48974,Cluster-26447.48972,Cluster-26447.48975
GO:0016651	oxidoreductase activity, acting on NAD(P)H	molecular_function	0.034636	1	11	966	745	126097	Cluster-26447.96780,Cluster-26447.107355,Cluster-26447.99447,Cluster-26447.155053,Cluster-26447.155054,Cluster-26447.91523,Cluster-26447.155056,Cluster-26447.167194,Cluster-26447.77681,Cluster-26447.84141,Cluster-26447.155043
GO:0090231	regulation of spindle checkpoint	biological_process	0.034988	1	2	966	35	126097	Cluster-26447.99213,Cluster-26447.114984
GO:0090266	regulation of mitotic cell cycle spindle assembly checkpoint	biological_process	0.034988	1	2	966	35	126097	Cluster-26447.114984,Cluster-26447.99213
GO:1901976	regulation of cell cycle checkpoint	biological_process	0.034988	1	2	966	35	126097	Cluster-26447.114984,Cluster-26447.99213
GO:1903504	regulation of mitotic spindle checkpoint	biological_process	0.034988	1	2	966	35	126097	Cluster-26447.114984,Cluster-26447.99213
GO:0004797	thymidine kinase activity	molecular_function	0.035809	1	3	966	76	126097	Cluster-26447.75347,Cluster-26447.204182,Cluster-26447.165528
GO:0006230	TMP biosynthetic process	biological_process	0.035809	1	3	966	76	126097	Cluster-26447.75347,Cluster-26447.204182,Cluster-26447.165528
GO:0009173	pyrimidine ribonucleoside monophosphate metabolic process	biological_process	0.035809	1	3	966	76	126097	Cluster-26447.165528,Cluster-26447.75347,Cluster-26447.204182
GO:0009174	pyrimidine ribonucleoside monophosphate biosynthetic process	biological_process	0.035809	1	3	966	76	126097	Cluster-26447.165528,Cluster-26447.75347,Cluster-26447.204182
GO:0019136	deoxynucleoside kinase activity	molecular_function	0.035809	1	3	966	76	126097	Cluster-26447.75347,Cluster-26447.204182,Cluster-26447.165528
GO:0019206	nucleoside kinase activity	molecular_function	0.035809	1	3	966	76	126097	Cluster-26447.204182,Cluster-26447.75347,Cluster-26447.165528
GO:0046044	TMP metabolic process	biological_process	0.035809	1	3	966	76	126097	Cluster-26447.165528,Cluster-26447.204182,Cluster-26447.75347
GO:0034062	RNA polymerase activity	molecular_function	0.037633	1	19	966	1444	126097	Cluster-26447.204304,Cluster-26447.205044,Cluster-26447.146706,Cluster-26447.204617,Cluster-26447.141736,Cluster-26447.119323,Cluster-26447.181772,Cluster-26447.10621,Cluster-26447.135875,Cluster-26447.127758,Cluster-26447.176499,Cluster-26447.113791,Cluster-26447.140660,Cluster-26447.9447,Cluster-26447.57410,Cluster-26447.110145,Cluster-26447.203505,Cluster-26447.22355,Cluster-26447.33049
GO:0003842	1-pyrroline-5-carboxylate dehydrogenase activity	molecular_function	0.037874	1	1	966	5	126097	Cluster-26447.48824
GO:0006561	proline biosynthetic process	biological_process	0.037874	1	1	966	5	126097	Cluster-26447.48824
GO:0004827	proline-tRNA ligase activity	molecular_function	0.03795	1	2	966	37	126097	Cluster-26447.113937,Cluster-26447.146217
GO:0006433	prolyl-tRNA aminoacylation	biological_process	0.03795	1	2	966	37	126097	Cluster-26447.113937,Cluster-26447.146217
GO:0009219	pyrimidine deoxyribonucleotide metabolic process	biological_process	0.038803	1	4	966	144	126097	Cluster-26447.75347,Cluster-26447.204182,Cluster-26447.165528,Cluster-26447.100182
GO:0072528	pyrimidine-containing compound biosynthetic process	biological_process	0.039186	1	7	966	409	126097	Cluster-26447.84141,Cluster-26447.75347,Cluster-26447.204182,Cluster-26447.8416,Cluster-26447.165528,Cluster-26447.1470,Cluster-26447.100182
GO:0016769	transferase activity, transferring nitrogenous groups	molecular_function	0.039291	1	4	966	177	126097	Cluster-26447.125048,Cluster-26447.128951,Cluster-26447.145625,Cluster-26447.197288
GO:0019538	protein metabolic process	biological_process	0.039755	1	218	966	23960	126097	Cluster-26447.204132,Cluster-26447.159084,Cluster-26447.181330,Cluster-26447.45139,Cluster-26447.87827,Cluster-26447.154770,Cluster-26447.11275,Cluster-26447.115993,Cluster-26447.99074,Cluster-26447.99294,Cluster-26447.174995,Cluster-26447.37339,Cluster-26447.174150,Cluster-26447.56934,Cluster-26447.117613,Cluster-26447.13021,Cluster-26447.185243,Cluster-26447.144646,Cluster-26447.165876,Cluster-…
GO:0016854	racemase and epimerase activity	molecular_function	0.039795	1	4	966	174	126097	Cluster-26447.187623,Cluster-26447.98682,Cluster-26447.1470,Cluster-26447.8416
GO:0007548	sex differentiation	biological_process	0.039975	1	3	966	100	126097	Cluster-26447.75058,Cluster-26447.50022,Cluster-26447.181705
GO:0030212	hyaluronan metabolic process	biological_process	0.040655	1	1	966	3	126097	Cluster-26447.122456
GO:0033856	pyridoxine 5'-phosphate synthase activity	molecular_function	0.040676	1	1	966	9	126097	Cluster-26447.197288
GO:0009112	nucleobase metabolic process	biological_process	0.041971	1	27	966	2287	126097	Cluster-26447.113791,Cluster-26447.176499,Cluster-26447.69821,Cluster-26447.135875,Cluster-26447.127758,Cluster-26447.159125,Cluster-26447.10621,Cluster-26447.181772,Cluster-26447.119323,Cluster-26447.204182,Cluster-26447.141736,Cluster-26447.146706,Cluster-26447.190134,Cluster-26447.205044,Cluster-26447.85633,Cluster-26447.204304,Cluster-26447.65687,Cluster-26447.75347,Cluster-26447.33049,Cluste…
GO:0046916	cellular transition metal ion homeostasis	biological_process	0.042584	1	2	966	50	126097	Cluster-1202.1,Cluster-1202.0
GO:0033057	multicellular organismal reproductive behavior	biological_process	0.042658	1	2	966	42	126097	Cluster-26447.46049,Cluster-26447.46051
GO:0045924	regulation of female receptivity	biological_process	0.042658	1	2	966	42	126097	Cluster-26447.46049,Cluster-26447.46051
GO:0046008	regulation of female receptivity, post-mating	biological_process	0.042658	1	2	966	42	126097	Cluster-26447.46051,Cluster-26447.46049
GO:0060180	female mating behavior	biological_process	0.042658	1	2	966	42	126097	Cluster-26447.46049,Cluster-26447.46051
GO:1901362	organic cyclic compound biosynthetic process	biological_process	0.043238	1	155	966	16988	126097	Cluster-26447.186121,Cluster-26447.114984,Cluster-26447.13031,Cluster-26447.190563,Cluster-26447.115609,Cluster-26447.133826,Cluster-26447.142960,Cluster-26447.155828,Cluster-26447.118364,Cluster-26447.111366,Cluster-26447.106016,Cluster-26447.57455,Cluster-26447.46051,Cluster-26447.57657,Cluster-26447.204994,Cluster-26447.12358,Cluster-26447.9447,Cluster-26447.118735,Cluster-26447.122732,Cluster…
GO:0009394	2'-deoxyribonucleotide metabolic process	biological_process	0.043703	1	4	966	149	126097	Cluster-26447.75347,Cluster-26447.204182,Cluster-26447.165528,Cluster-26447.100182
GO:0019692	deoxyribose phosphate metabolic process	biological_process	0.043703	1	4	966	149	126097	Cluster-26447.165528,Cluster-26447.100182,Cluster-26447.75347,Cluster-26447.204182
GO:0016646	oxidoreductase activity, acting on the CH-NH group of donors, NAD or NADP as acceptor	molecular_function	0.043786	1	4	966	169	126097	Cluster-26447.12358,Cluster-26447.84696,Cluster-26447.48824,Cluster-26447.118364
GO:0006953	acute-phase response	biological_process	0.043998	1	1	966	9	126097	Cluster-26447.133527
GO:0003682	chromatin binding	molecular_function	0.044442	1	6	966	314	126097	Cluster-26447.133824,Cluster-26447.133826,Cluster-26447.111620,Cluster-26447.113291,Cluster-26447.123519,Cluster-26447.129960
GO:0043648	dicarboxylic acid metabolic process	biological_process	0.044807	1	13	966	896	126097	Cluster-26447.103544,Cluster-26447.113672,Cluster-26447.200422,Cluster-26447.59922,Cluster-26447.113791,Cluster-26447.200419,Cluster-26447.117840,Cluster-26447.58690,Cluster-26447.91395,Cluster-26447.42067,Cluster-26447.187623,Cluster-26447.44385,Cluster-26447.140660
GO:0015980	energy derivation by oxidation of organic compounds	biological_process	0.045027	1	19	966	1446	126097	Cluster-26447.91523,Cluster-26447.155054,Cluster-26447.91395,Cluster-26447.42067,Cluster-26447.117840,Cluster-26447.99447,Cluster-26447.120331,Cluster-26447.147762,Cluster-26447.155043,Cluster-26447.181385,Cluster-26447.37937,Cluster-26447.96780,Cluster-26447.113672,Cluster-26447.206523,Cluster-26447.155053,Cluster-26447.84141,Cluster-26447.99074,Cluster-26447.155056,Cluster-26447.124172
GO:0008643	carbohydrate transport	biological_process	0.045423	1	8	966	481	126097	Cluster-26447.75058,Cluster-26447.26018,Cluster-26447.88210,Cluster-26447.105025,Cluster-26447.58259,Cluster-26447.152478,Cluster-26447.74407,Cluster-26447.130453
GO:0043412	macromolecule modification	biological_process	0.045922	1	140	966	14296	126097	Cluster-26447.65361,Cluster-26447.20699,Cluster-26447.216592,Cluster-26447.96215,Cluster-26447.44436,Cluster-26447.191833,Cluster-26447.28606,Cluster-26447.142264,Cluster-26447.206350,Cluster-12542.0,Cluster-26447.194966,Cluster-26447.11482,Cluster-26447.62280,Cluster-26447.136982,Cluster-26447.100558,Cluster-26447.105017,Cluster-26447.58449,Cluster-26447.13906,Cluster-26447.56934,Cluster-26447.1…
GO:0072350	tricarboxylic acid metabolic process	biological_process	0.04607	1	8	966	406	126097	Cluster-26447.206523,Cluster-26447.42067,Cluster-26447.117840,Cluster-26447.91395,Cluster-26447.147762,Cluster-26447.127427,Cluster-26447.96215,Cluster-26447.97817
GO:0004126	cytidine deaminase activity	molecular_function	0.046082	1	1	966	8	126097	Cluster-26447.162631
GO:0006216	cytidine catabolic process	biological_process	0.046082	1	1	966	8	126097	Cluster-26447.162631
GO:0009164	nucleoside catabolic process	biological_process	0.046082	1	1	966	8	126097	Cluster-26447.162631
GO:0009972	cytidine deamination	biological_process	0.046082	1	1	966	8	126097	Cluster-26447.162631
GO:0042454	ribonucleoside catabolic process	biological_process	0.046082	1	1	966	8	126097	Cluster-26447.162631
GO:0046087	cytidine metabolic process	biological_process	0.046082	1	1	966	8	126097	Cluster-26447.162631
GO:0046133	pyrimidine ribonucleoside catabolic process	biological_process	0.046082	1	1	966	8	126097	Cluster-26447.162631
GO:0046135	pyrimidine nucleoside catabolic process	biological_process	0.046082	1	1	966	8	126097	Cluster-26447.162631
GO:0072529	pyrimidine-containing compound catabolic process	biological_process	0.046082	1	1	966	8	126097	Cluster-26447.162631
GO:1901658	glycosyl compound catabolic process	biological_process	0.046082	1	1	966	8	126097	Cluster-26447.162631
GO:0006772	thiamine metabolic process	biological_process	0.046442	1	3	966	116	126097	Cluster-26447.1470,Cluster-26447.8416,Cluster-26447.84141
GO:0042723	thiamine-containing compound metabolic process	biological_process	0.046442	1	3	966	116	126097	Cluster-26447.8416,Cluster-26447.84141,Cluster-26447.1470
GO:0046497	nicotinate nucleotide metabolic process	biological_process	0.046443	1	4	966	156	126097	Cluster-26447.155043,Cluster-26447.155054,Cluster-26447.155053,Cluster-26447.155056
GO:0008374	O-acyltransferase activity	molecular_function	0.049689	1	6	966	316	126097	Cluster-26447.138049,Cluster-26447.67834,Cluster-26447.55740,Cluster-26447.46051,Cluster-8641.3,Cluster-26447.46049
GO:0009262	deoxyribonucleotide metabolic process	biological_process	0.049715	1	4	966	157	126097	Cluster-26447.100182,Cluster-26447.165528,Cluster-26447.204182,Cluster-26447.75347
GO:0008907	integrase activity	molecular_function	0.050279	1	1	966	11	126097	Cluster-26447.103711
GO:0016857	racemase and epimerase activity, acting on carbohydrates and derivatives	molecular_function	0.050842	1	3	966	119	126097	Cluster-26447.1470,Cluster-26447.98682,Cluster-26447.8416
GO:0004474	malate synthase activity	molecular_function	0.051329	1	1	966	9	126097	Cluster-26447.147762
GO:0006793	phosphorus metabolic process	biological_process	0.05324	1	140	966	14759	126097	Cluster-26447.94358,Cluster-26447.105290,Cluster-26447.79310,Cluster-26447.137118,Cluster-26447.1908,Cluster-26447.109452,Cluster-26447.58618,Cluster-26447.129960,Cluster-26447.58613,Cluster-26447.69821,Cluster-1093.5,Cluster-26447.10934,Cluster-26447.113900,Cluster-26447.155043,Cluster-26447.19284,Cluster-26447.12299,Cluster-936.1,Cluster-26447.1432,Cluster-26447.66120,Cluster-26447.135732,Clust…
GO:0006796	phosphate-containing compound metabolic process	biological_process	0.053536	1	139	966	14640	126097	Cluster-26447.86266,Cluster-26447.93043,Cluster-26447.148200,Cluster-26447.155828,Cluster-26447.142960,Cluster-26447.27576,Cluster-26447.133826,Cluster-1202.1,Cluster-26447.81554,Cluster-26447.146597,Cluster-26447.178801,Cluster-26447.204182,Cluster-26447.205596,Cluster-26447.102122,Cluster-26447.153858,Cluster-26447.1434,Cluster-26447.41274,Cluster-26447.12934,Cluster-26447.156147,Cluster-26447.…
GO:0004016	adenylate cyclase activity	molecular_function	0.0539	1	2	966	40	126097	Cluster-26447.102199,Cluster-26447.69821
GO:0006171	cAMP biosynthetic process	biological_process	0.0539	1	2	966	40	126097	Cluster-26447.102199,Cluster-26447.69821
GO:0007399	nervous system development	biological_process	0.053942	1	4	966	160	126097	Cluster-26447.9136,Cluster-26447.216685,Cluster-26447.173511,Cluster-26447.208563
GO:0030145	manganese ion binding	molecular_function	0.056892	1	3	966	103	126097	Cluster-26447.174995,Cluster-26447.130194,Cluster-26447.110133
GO:0006464	cellular protein modification process	biological_process	0.057573	1	123	966	12626	126097	Cluster-4869.0,Cluster-26447.110455,Cluster-26447.119537,Cluster-26447.12321,Cluster-26447.206523,Cluster-26447.65167,Cluster-26447.82299,Cluster-26447.122456,Cluster-26447.201669,Cluster-26447.48425,Cluster-26447.63613,Cluster-26447.57307,Cluster-26447.109000,Cluster-26447.133824,Cluster-26447.173016,Cluster-26447.18331,Cluster-26447.177865,Cluster-26447.176793,Cluster-26447.177505,Cluster-26447…
GO:0036211	protein modification process	biological_process	0.057573	1	123	966	12626	126097	Cluster-26447.173016,Cluster-26447.109000,Cluster-26447.57307,Cluster-26447.133824,Cluster-26447.18331,Cluster-26447.177865,Cluster-26447.177505,Cluster-26447.176793,Cluster-26447.66288,Cluster-26447.141050,Cluster-26447.1433,Cluster-26447.48424,Cluster-26447.203,Cluster-26447.136985,Cluster-26447.148206,Cluster-26447.37225,Cluster-26447.82623,Cluster-26447.99255,Cluster-26447.92151,Cluster-26447…
GO:0035429	gluconate transmembrane transport	biological_process	0.058258	1	1	966	10	126097	Cluster-26447.58259
GO:0044766	multi-organism transport	biological_process	0.05986	1	4	966	168	126097	Cluster-26447.48972,Cluster-26447.48975,Cluster-26447.48974,Cluster-26447.54173
GO:0046794	transport of virus	biological_process	0.05986	1	4	966	168	126097	Cluster-26447.48974,Cluster-26447.54173,Cluster-26447.48972,Cluster-26447.48975
GO:1902579	multi-organism localization	biological_process	0.05986	1	4	966	168	126097	Cluster-26447.54173,Cluster-26447.48974,Cluster-26447.48975,Cluster-26447.48972
GO:0006821	chloride transport	biological_process	0.059866	1	3	966	100	126097	Cluster-30803.0,Cluster-26447.204981,Cluster-26447.34247
GO:0035639	purine ribonucleoside triphosphate binding	molecular_function	0.059923	1	170	966	17594	126097	Cluster-26447.110455,Cluster-26447.159203,Cluster-26447.82299,Cluster-26447.65167,Cluster-26447.206523,Cluster-26447.177865,Cluster-26447.158601,Cluster-26447.133824,Cluster-26447.66288,Cluster-26447.1433,Cluster-26447.37225,Cluster-26447.103544,Cluster-26447.136985,Cluster-26447.179601,Cluster-26447.87637,Cluster-26447.103231,Cluster-26447.111205,Cluster-26447.207435,Cluster-1202.0,Cluster-26447…
GO:0018189	pyrroloquinoline quinone biosynthetic process	biological_process	0.06022	1	1	966	9	126097	Cluster-26447.96215
GO:0018212	peptidyl-tyrosine modification	biological_process	0.06022	1	1	966	9	126097	Cluster-26447.96215
GO:0044271	cellular nitrogen compound biosynthetic process	biological_process	0.062046	1	183	966	20887	126097	Cluster-26447.83904,Cluster-26447.132072,Cluster-26447.40614,Cluster-26447.45139,Cluster-26447.200422,Cluster-26447.174995,Cluster-26447.195148,Cluster-26447.99294,Cluster-26447.117280,Cluster-26447.190134,Cluster-26447.103862,Cluster-26447.147331,Cluster-26447.185243,Cluster-26447.144646,Cluster-26447.204981,Cluster-26447.186401,Cluster-26447.204734,Cluster-26447.111620,Cluster-26447.72759,Clust…
GO:0016747	transferase activity, transferring acyl groups other than amino-acyl groups	molecular_function	0.062353	1	18	966	1503	126097	Cluster-26447.204181,Cluster-8641.2,Cluster-26447.138049,Cluster-26447.55740,Cluster-26447.46051,Cluster-26447.46049,Cluster-26447.140493,Cluster-26447.22521,Cluster-26447.933,Cluster-26447.22523,Cluster-26447.52943,Cluster-26447.197774,Cluster-26447.1324,Cluster-26447.90686,Cluster-8641.3,Cluster-26447.67834,Cluster-26447.190554,Cluster-26447.96220
GO:0031175	neuron projection development	biological_process	0.062714	1	3	966	111	126097	Cluster-26447.9136,Cluster-26447.208563,Cluster-26447.216685
GO:0048666	neuron development	biological_process	0.062714	1	3	966	111	126097	Cluster-26447.9136,Cluster-26447.208563,Cluster-26447.216685
GO:0016740	transferase activity	molecular_function	0.063456	1	221	966	23962	126097	Cluster-26447.92151,Cluster-26447.179601,Cluster-26447.136985,Cluster-26447.37225,Cluster-26447.90686,Cluster-26447.97817,Cluster-26447.66288,Cluster-26447.127427,Cluster-8641.3,Cluster-26447.1433,Cluster-26447.81411,Cluster-26447.133824,Cluster-26447.177865,Cluster-26447.52943,Cluster-26447.48425,Cluster-26447.65167,Cluster-26447.205592,Cluster-26447.206523,Cluster-26447.82299,Cluster-26447.1358…
GO:0009975	cyclase activity	molecular_function	0.065336	1	3	966	105	126097	Cluster-26447.85633,Cluster-26447.102199,Cluster-26447.69821
GO:0016667	oxidoreductase activity, acting on a sulfur group of donors	molecular_function	0.065478	1	8	966	581	126097	Cluster-26447.159084,Cluster-26447.33592,Cluster-26447.45949,Cluster-26447.111429,Cluster-26447.111620,Cluster-26447.35718,Cluster-26447.167194,Cluster-26447.113291
GO:0044710	single-organism metabolic process	biological_process	0.067658	1	259	966	29481	126097	Cluster-26447.18947,Cluster-26447.53809,Cluster-26447.123064,Cluster-26447.87702,Cluster-26447.197288,Cluster-26447.165528,Cluster-26447.185494,Cluster-26447.80998,Cluster-26447.42067,Cluster-26447.28828,Cluster-26447.22355,Cluster-26447.163505,Cluster-26447.84141,Cluster-26447.116962,Cluster-26447.153433,Cluster-26447.85633,Cluster-26447.207435,Cluster-26447.146706,Cluster-26447.56669,Cluster-26…
GO:0006040	amino sugar metabolic process	biological_process	0.068703	1	5	966	248	126097	Cluster-26447.1470,Cluster-26447.98682,Cluster-26447.59916,Cluster-26447.160578,Cluster-26447.8416
GO:0016765	transferase activity, transferring alkyl or aryl (other than methyl) groups	molecular_function	0.068704	1	8	966	531	126097	Cluster-26447.8416,Cluster-26447.114501,Cluster-26447.92151,Cluster-26447.206350,Cluster-26447.1470,Cluster-26447.97817,Cluster-26447.127427,Cluster-26447.173555
GO:0008152	metabolic process	biological_process	0.06895	1	571	966	69371	126097	Cluster-26447.117264,Cluster-26447.79310,Cluster-26447.94358,Cluster-26447.109452,Cluster-26447.197696,Cluster-26447.113791,Cluster-26447.23231,Cluster-26447.95481,Cluster-26447.129960,Cluster-26447.127219,Cluster-26447.113900,Cluster-26447.63019,Cluster-26447.57410,Cluster-26447.68826,Cluster-26447.66120,Cluster-26447.50022,Cluster-26447.112972,Cluster-26447.178802,Cluster-26447.74527,Cluster-26…
GO:0007617	mating behavior	biological_process	0.069165	1	2	966	54	126097	Cluster-26447.46049,Cluster-26447.46051
GO:0019098	reproductive behavior	biological_process	0.069165	1	2	966	54	126097	Cluster-26447.46051,Cluster-26447.46049
GO:0044705	multi-organism reproductive behavior	biological_process	0.069165	1	2	966	54	126097	Cluster-26447.46049,Cluster-26447.46051
GO:0005134	interleukin-2 receptor binding	molecular_function	0.070243	1	1	966	8	126097	Cluster-31356.0
GO:0005893	interleukin-2 receptor complex	cellular_component	0.070243	1	1	966	8	126097	Cluster-31356.0
GO:0009218	pyrimidine ribonucleotide metabolic process	biological_process	0.071224	1	3	966	119	126097	Cluster-26447.165528,Cluster-26447.75347,Cluster-26447.204182
GO:0009220	pyrimidine ribonucleotide biosynthetic process	biological_process	0.071224	1	3	966	119	126097	Cluster-26447.165528,Cluster-26447.75347,Cluster-26447.204182
GO:0045444	fat cell differentiation	biological_process	0.071459	1	2	966	57	126097	Cluster-26447.166543,Cluster-26447.173016
GO:0034220	ion transmembrane transport	biological_process	0.071595	1	23	966	2004	126097	Cluster-26447.114984,Cluster-26447.140126,Cluster-26447.207713,Cluster-26447.76180,Cluster-26447.163186,Cluster-26447.48334,Cluster-26447.22371,Cluster-26447.149497,Cluster-26447.2402,Cluster-26447.10933,Cluster-26447.10934,Cluster-26447.120543,Cluster-26447.77712,Cluster-26447.119868,Cluster-26447.11686,Cluster-26447.48330,Cluster-26447.164912,Cluster-26447.66043,Cluster-26447.66517,Cluster-2644…
GO:0072527	pyrimidine-containing compound metabolic process	biological_process	0.072088	1	19	966	1620	126097	Cluster-26447.204304,Cluster-26447.205044,Cluster-26447.141736,Cluster-26447.204182,Cluster-26447.84141,Cluster-26447.181772,Cluster-26447.1470,Cluster-26447.159125,Cluster-26447.135875,Cluster-26447.127758,Cluster-26447.8416,Cluster-26447.113791,Cluster-26447.140660,Cluster-26447.9447,Cluster-26447.162631,Cluster-26447.165528,Cluster-26447.110145,Cluster-26447.100182,Cluster-26447.75347
GO:0008294	calcium- and calmodulin-responsive adenylate cyclase activity	molecular_function	0.07321	1	1	966	8	126097	Cluster-26447.102199
GO:0046487	glyoxylate metabolic process	biological_process	0.07348	1	4	966	211	126097	Cluster-26447.84696,Cluster-26447.147762,Cluster-26447.12358,Cluster-26447.118364
GO:0004066	asparagine synthase (glutamine-hydrolyzing) activity	molecular_function	0.074043	1	2	966	53	126097	Cluster-26447.200422,Cluster-26447.200419
GO:0006529	asparagine biosynthetic process	biological_process	0.074043	1	2	966	53	126097	Cluster-26447.200422,Cluster-26447.200419
GO:0019530	taurine metabolic process	biological_process	0.074835	1	2	966	52	126097	Cluster-26447.176793,Cluster-26447.123640
GO:0002526	acute inflammatory response	biological_process	0.074842	1	1	966	15	126097	Cluster-26447.133527
GO:0009088	threonine biosynthetic process	biological_process	0.075923	1	1	966	7	126097	Cluster-26447.185243
GO:0008410	CoA-transferase activity	molecular_function	0.076934	1	1	966	14	126097	Cluster-26447.206523
GO:0032007	negative regulation of TOR signaling	biological_process	0.076982	1	1	966	13	126097	Cluster-26447.211242
GO:0038179	neurotrophin signaling pathway	biological_process	0.076982	1	1	966	13	126097	Cluster-26447.211242
GO:0048011	neurotrophin TRK receptor signaling pathway	biological_process	0.076982	1	1	966	13	126097	Cluster-26447.211242
GO:0070848	response to growth factor	biological_process	0.076982	1	1	966	13	126097	Cluster-26447.211242
GO:0071363	cellular response to growth factor stimulus	biological_process	0.076982	1	1	966	13	126097	Cluster-26447.211242
GO:1902532	negative regulation of intracellular signal transduction	biological_process	0.076982	1	1	966	13	126097	Cluster-26447.211242
GO:0009968	negative regulation of signal transduction	biological_process	0.077551	1	2	966	57	126097	Cluster-26447.211242,Cluster-27210.2
GO:0030880	RNA polymerase complex	cellular_component	0.077786	1	13	966	1015	126097	Cluster-26447.146706,Cluster-26447.119323,Cluster-26447.172340,Cluster-26447.58799,Cluster-26447.22355,Cluster-26447.48424,Cluster-26447.203505,Cluster-26447.10621,Cluster-26447.3666,Cluster-26447.135875,Cluster-26447.33049,Cluster-26447.48425,Cluster-26447.176499
GO:0043022	ribosome binding	molecular_function	0.078584	1	2	966	71	126097	Cluster-26447.156505,Cluster-26447.156490
GO:0005795	Golgi stack	cellular_component	0.079773	1	2	966	56	126097	Cluster-26447.107986,Cluster-26447.13906
GO:0043772	acyl-phosphate glycerol-3-phosphate acyltransferase activity	molecular_function	0.080997	1	1	966	10	126097	Cluster-26447.197774
GO:0010648	negative regulation of cell communication	biological_process	0.081495	1	2	966	59	126097	Cluster-26447.211242,Cluster-27210.2
GO:0023057	negative regulation of signaling	biological_process	0.081495	1	2	966	59	126097	Cluster-26447.211242,Cluster-27210.2
GO:0018130	heterocycle biosynthetic process	biological_process	0.082933	1	145	966	16198	126097	Cluster-26447.72759,Cluster-26447.204734,Cluster-26447.111620,Cluster-26447.186401,Cluster-26447.48824,Cluster-26447.204981,Cluster-26447.185243,Cluster-26447.140660,Cluster-26447.119099,Cluster-26447.184313,Cluster-26447.58799,Cluster-26447.180526,Cluster-26447.40614,Cluster-26447.132072,Cluster-26447.83904,Cluster-26447.147331,Cluster-26447.190134,Cluster-26447.103862,Cluster-26447.195148,Clust…
GO:0009187	cyclic nucleotide metabolic process	biological_process	0.08359	1	3	966	128	126097	Cluster-26447.102199,Cluster-26447.69821,Cluster-26447.85633
GO:0098687	chromosomal region	cellular_component	0.084535	1	11	966	821	126097	Cluster-26447.129960,Cluster-26447.135888,Cluster-26447.133826,Cluster-26447.184773,Cluster-26447.111620,Cluster-26447.34247,Cluster-26447.184774,Cluster-26447.133824,Cluster-26447.123519,Cluster-26447.34800,Cluster-26447.113291
GO:1901607	alpha-amino acid biosynthetic process	biological_process	0.086068	1	18	966	1615	126097	Cluster-26447.46049,Cluster-26447.46051,Cluster-26447.44385,Cluster-26447.118364,Cluster-26447.207435,Cluster-26447.58690,Cluster-26447.8416,Cluster-26447.1470,Cluster-26447.108565,Cluster-26447.113672,Cluster-26447.200422,Cluster-26447.187623,Cluster-26447.98682,Cluster-26447.12358,Cluster-26447.84696,Cluster-26447.185243,Cluster-26447.200419,Cluster-26447.48824
GO:0032465	regulation of cytokinesis	biological_process	0.087416	1	2	966	55	126097	Cluster-4869.0,Cluster-26447.73989
GO:0005488	binding	molecular_function	0.087852	1	605	966	72411	126097	Cluster-26447.147030,Cluster-26447.43983,Cluster-26447.135089,Cluster-26447.9095,Cluster-26447.88210,Cluster-26447.88401,Cluster-26447.42727,Cluster-26447.122810,Cluster-26447.110145,Cluster-26447.120331,Cluster-26447.194577,Cluster-26447.9012,Cluster-26447.58449,Cluster-26447.99448,Cluster-26447.40114,Cluster-26447.216592,Cluster-26447.177405,Cluster-26447.204930,Cluster-26447.65278,Cluster-2644…
GO:0006790	sulfur compound metabolic process	biological_process	0.088322	1	15	966	1264	126097	Cluster-26447.176793,Cluster-26447.46051,Cluster-26447.125593,Cluster-26447.46049,Cluster-26447.84141,Cluster-26447.181705,Cluster-26447.109452,Cluster-26447.190134,Cluster-26447.123640,Cluster-26447.135732,Cluster-26447.8416,Cluster-26447.60729,Cluster-26447.65687,Cluster-26447.206523,Cluster-26447.1470
GO:0098656	anion transmembrane transport	biological_process	0.089877	1	5	966	305	126097	Cluster-26447.119868,Cluster-26447.76180,Cluster-26447.58259,Cluster-26447.149497,Cluster-26447.166736
GO:1903825	organic acid transmembrane transport	biological_process	0.089877	1	5	966	305	126097	Cluster-26447.119868,Cluster-26447.76180,Cluster-26447.58259,Cluster-26447.149497,Cluster-26447.166736
GO:0008236	serine-type peptidase activity	molecular_function	0.091764	1	21	966	1906	126097	Cluster-26447.147570,Cluster-26447.163880,Cluster-26447.107160,Cluster-26447.40614,Cluster-26447.10621,Cluster-26447.38965,Cluster-26447.119323,Cluster-26447.40114,Cluster-26447.60284,Cluster-26447.43676,Cluster-26447.91562,Cluster-26447.65428,Cluster-26447.26494,Cluster-26447.60366,Cluster-26447.112036,Cluster-969.1,Cluster-26447.91564,Cluster-26447.53809,Cluster-26447.130231,Cluster-26447.66609…
GO:0017171	serine hydrolase activity	molecular_function	0.091764	1	21	966	1906	126097	Cluster-26447.60366,Cluster-26447.26494,Cluster-26447.112036,Cluster-26447.130231,Cluster-26447.91564,Cluster-969.1,Cluster-26447.53809,Cluster-26447.66609,Cluster-26447.173016,Cluster-26447.107160,Cluster-26447.163880,Cluster-26447.147570,Cluster-26447.38965,Cluster-26447.40614,Cluster-26447.10621,Cluster-26447.60284,Cluster-26447.119323,Cluster-26447.40114,Cluster-26447.65428,Cluster-26447.9156…
GO:0000346	transcription export complex	cellular_component	0.092158	1	3	966	131	126097	Cluster-26447.94538,Cluster-26447.85436,Cluster-26447.94540
GO:0000445	THO complex part of transcription export complex	cellular_component	0.092158	1	3	966	131	126097	Cluster-26447.94538,Cluster-26447.94540,Cluster-26447.85436
GO:0016849	phosphorus-oxygen lyase activity	molecular_function	0.092343	1	3	966	130	126097	Cluster-26447.85633,Cluster-26447.102199,Cluster-26447.69821
GO:0009070	serine family amino acid biosynthetic process	biological_process	0.092968	1	2	966	53	126097	Cluster-26447.46049,Cluster-26447.46051
GO:0004645	phosphorylase activity	molecular_function	0.093068	1	1	966	8	126097	Cluster-31356.0
GO:0008184	glycogen phosphorylase activity	molecular_function	0.093068	1	1	966	8	126097	Cluster-31356.0
GO:1901576	organic substance biosynthetic process	biological_process	0.09379	1	250	966	29233	126097	Cluster-26447.40614,Cluster-26447.200422,Cluster-26447.48330,Cluster-26447.45139,Cluster-26447.132072,Cluster-26447.83904,Cluster-26447.147331,Cluster-26447.190134,Cluster-26447.103862,Cluster-26447.216958,Cluster-26447.195148,Cluster-26447.99294,Cluster-26447.117280,Cluster-26447.174995,Cluster-26447.165876,Cluster-26447.72759,Cluster-26447.204734,Cluster-26447.22371,Cluster-26447.186401,Cluster…
GO:0042611	MHC protein complex	cellular_component	0.094247	1	2	966	65	126097	Cluster-26447.114501,Cluster-26447.79081
GO:0042613	MHC class II protein complex	cellular_component	0.094247	1	2	966	65	126097	Cluster-26447.114501,Cluster-26447.79081
GO:0044711	single-organism biosynthetic process	biological_process	0.094893	1	82	966	8914	126097	Cluster-26447.53906,Cluster-26447.69821,Cluster-26447.113672,Cluster-26447.46049,Cluster-26447.84141,Cluster-26447.125593,Cluster-26447.107986,Cluster-26447.207435,Cluster-26447.85633,Cluster-26447.67052,Cluster-26447.107804,Cluster-26447.28828,Cluster-26447.123064,Cluster-26447.10934,Cluster-26447.53809,Cluster-26447.155043,Cluster-26447.165528,Cluster-26447.197288,Cluster-26447.39092,Cluster-26…
GO:0046058	cAMP metabolic process	biological_process	0.096356	1	2	966	63	126097	Cluster-26447.102199,Cluster-26447.69821
GO:0061695	transferase complex, transferring phosphorus-containing groups	cellular_component	0.097729	1	28	966	2525	126097	Cluster-26447.146706,Cluster-26447.137118,Cluster-26447.113291,Cluster-26447.79310,Cluster-26447.216958,Cluster-26447.119323,Cluster-26447.172340,Cluster-26447.74407,Cluster-26447.122456,Cluster-26447.10621,Cluster-26447.135875,Cluster-26447.48425,Cluster-26447.203494,Cluster-26447.53906,Cluster-26447.176499,Cluster-26447.111493,Cluster-26447.26018,Cluster-26447.58799,Cluster-26447.130453,Cluster…
GO:0051287	NAD binding	molecular_function	0.098819	1	13	966	1017	126097	Cluster-26447.112768,Cluster-26447.113958,Cluster-26447.155076,Cluster-26447.110207,Cluster-26447.117840,Cluster-26447.42067,Cluster-26447.91395,Cluster-26447.148200,Cluster-26447.175970,Cluster-26447.118364,Cluster-26447.56669,Cluster-26447.123064,Cluster-26447.724
GO:0008455	alpha-1,6-mannosylglycoprotein 2-beta-N-acetylglucosaminyltransferase activity	molecular_function	0.099695	1	1	966	10	126097	Cluster-26447.107986
GO:0009067	aspartate family amino acid biosynthetic process	biological_process	0.10061	1	5	966	305	126097	Cluster-26447.200422,Cluster-26447.44385,Cluster-26447.187623,Cluster-26447.200419,Cluster-26447.185243
GO:0005342	organic acid transmembrane transporter activity	molecular_function	0.10084	1	5	966	295	126097	Cluster-26447.119868,Cluster-26447.58259,Cluster-26447.166736,Cluster-26447.158601,Cluster-26447.149497
GO:0046943	carboxylic acid transmembrane transporter activity	molecular_function	0.10084	1	5	966	295	126097	Cluster-26447.119868,Cluster-26447.58259,Cluster-26447.149497,Cluster-26447.158601,Cluster-26447.166736
GO:0004984	olfactory receptor activity	molecular_function	0.10103	1	1	966	16	126097	Cluster-26447.156997
GO:0006221	pyrimidine nucleotide biosynthetic process	biological_process	0.10209	1	4	966	221	126097	Cluster-26447.204182,Cluster-26447.75347,Cluster-26447.100182,Cluster-26447.165528
GO:0006891	intra-Golgi vesicle-mediated transport	biological_process	0.1027	1	4	966	199	126097	Cluster-26447.84191,Cluster-26447.48978,Cluster-26447.43676,Cluster-26447.9095
GO:0000347	THO complex	cellular_component	0.10289	1	3	966	138	126097	Cluster-26447.85436,Cluster-26447.94540,Cluster-26447.94538
GO:0004789	thiamine-phosphate diphosphorylase activity	molecular_function	0.10291	1	2	966	85	126097	Cluster-26447.8416,Cluster-26447.1470
GO:0045149	acetoin metabolic process	biological_process	0.10291	1	1	966	14	126097	Cluster-26447.69158
GO:0045151	acetoin biosynthetic process	biological_process	0.10291	1	1	966	14	126097	Cluster-26447.69158
GO:0047605	acetolactate decarboxylase activity	molecular_function	0.10291	1	1	966	14	126097	Cluster-26447.69158
GO:0001871	pattern binding	molecular_function	0.10299	1	7	966	482	126097	Cluster-26447.58259,Cluster-26447.6629,Cluster-1093.2,Cluster-1093.1,Cluster-936.1,Cluster-26447.110145,Cluster-26447.62479
GO:0030247	polysaccharide binding	molecular_function	0.10299	1	7	966	482	126097	Cluster-26447.62479,Cluster-26447.110145,Cluster-936.1,Cluster-1093.1,Cluster-26447.6629,Cluster-1093.2,Cluster-26447.58259
GO:0000096	sulfur amino acid metabolic process	biological_process	0.10319	1	4	966	222	126097	Cluster-26447.46049,Cluster-26447.176793,Cluster-26447.46051,Cluster-26447.181705
GO:0019438	aromatic compound biosynthetic process	biological_process	0.10334	1	141	966	15867	126097	Cluster-26447.125048,Cluster-26447.75347,Cluster-26447.100182,Cluster-26447.48424,Cluster-26447.205876,Cluster-26447.10933,Cluster-26447.87881,Cluster-26447.8416,Cluster-26447.168299,Cluster-26447.135888,Cluster-26447.119323,Cluster-26447.172340,Cluster-26447.120301,Cluster-26447.216733,Cluster-26447.127538,Cluster-26447.134629,Cluster-26447.112972,Cluster-26447.45949,Cluster-26447.9960,Cluster-2…
GO:0044706	multi-multicellular organism process	biological_process	0.10344	1	5	966	259	126097	Cluster-26447.46049,Cluster-26447.46051,Cluster-26447.148206,Cluster-26447.1908,Cluster-26447.201669
GO:0034755	iron ion transmembrane transport	biological_process	0.10419	1	2	966	72	126097	Cluster-26447.2402,Cluster-26447.125377
GO:0007608	sensory perception of smell	biological_process	0.10419	1	1	966	17	126097	Cluster-26447.156997
GO:0006397	mRNA processing	biological_process	0.10485	1	15	966	1268	126097	Cluster-26447.75058,Cluster-26447.58618,Cluster-26447.50022,Cluster-26447.135627,Cluster-26447.94538,Cluster-26447.113691,Cluster-26447.73778,Cluster-26447.85436,Cluster-26447.135625,Cluster-26447.101528,Cluster-26447.182885,Cluster-26447.94540,Cluster-26447.140820,Cluster-26447.181705,Cluster-26447.61385
GO:0004222	metalloendopeptidase activity	molecular_function	0.10495	1	9	966	635	126097	Cluster-26447.119474,Cluster-26447.134629,Cluster-26447.56410,Cluster-26447.84716,Cluster-26447.117264,Cluster-26447.1354,Cluster-26447.125929,Cluster-26447.118800,Cluster-26447.170430
GO:0008113	peptide-methionine (S)-S-oxide reductase activity	molecular_function	0.10713	1	1	966	17	126097	Cluster-26447.111429
GO:0007618	mating	biological_process	0.10732	1	2	966	68	126097	Cluster-26447.46049,Cluster-26447.46051
GO:0008703	5-amino-6-(5-phosphoribosylamino)uracil reductase activity	molecular_function	0.10748	1	1	966	17	126097	Cluster-26447.162961
GO:0000977	RNA polymerase II regulatory region sequence-specific DNA binding	molecular_function	0.10881	1	1	966	12	126097	Cluster-26447.81217
GO:0000978	RNA polymerase II core promoter proximal region sequence-specific DNA binding	molecular_function	0.10881	1	1	966	12	126097	Cluster-26447.81217
GO:0000982	transcription factor activity, RNA polymerase II core promoter proximal region sequence-specific binding	molecular_function	0.10881	1	1	966	12	126097	Cluster-26447.81217
GO:0000987	core promoter proximal region sequence-specific DNA binding	molecular_function	0.10881	1	1	966	12	126097	Cluster-26447.81217
GO:0001012	RNA polymerase II regulatory region DNA binding	molecular_function	0.10881	1	1	966	12	126097	Cluster-26447.81217
GO:0001159	core promoter proximal region DNA binding	molecular_function	0.10881	1	1	966	12	126097	Cluster-26447.81217
GO:0008199	ferric iron binding	molecular_function	0.10897	1	2	966	76	126097	Cluster-1202.1,Cluster-1202.0
GO:0009245	lipid A biosynthetic process	biological_process	0.11043	1	2	966	84	126097	Cluster-26447.90686,Cluster-26447.121272
GO:0046493	lipid A metabolic process	biological_process	0.11043	1	2	966	84	126097	Cluster-26447.121272,Cluster-26447.90686
GO:1901269	lipooligosaccharide metabolic process	biological_process	0.11043	1	2	966	84	126097	Cluster-26447.90686,Cluster-26447.121272
GO:1901271	lipooligosaccharide biosynthetic process	biological_process	0.11043	1	2	966	84	126097	Cluster-26447.121272,Cluster-26447.90686
GO:0055076	transition metal ion homeostasis	biological_process	0.11112	1	2	966	79	126097	Cluster-1202.0,Cluster-1202.1
GO:0016671	oxidoreductase activity, acting on a sulfur group of donors, disulfide as acceptor	molecular_function	0.11127	1	2	966	87	126097	Cluster-26447.111429,Cluster-26447.159084
GO:0006915	apoptotic process	biological_process	0.11137	1	7	966	478	126097	Cluster-26447.94358,Cluster-4869.0,Cluster-26447.86266,Cluster-26447.74891,Cluster-26447.73989,Cluster-26447.52385,Cluster-26447.146841
GO:0012501	programmed cell death	biological_process	0.11137	1	7	966	478	126097	Cluster-26447.86266,Cluster-26447.94358,Cluster-4869.0,Cluster-26447.73989,Cluster-26447.52385,Cluster-26447.146841,Cluster-26447.74891
GO:0044218	other organism cell membrane	cellular_component	0.11137	1	4	966	205	126097	Cluster-26447.48424,Cluster-26447.101528,Cluster-26447.61385,Cluster-26447.48425
GO:0044279	other organism membrane	cellular_component	0.11137	1	4	966	205	126097	Cluster-26447.61385,Cluster-26447.101528,Cluster-26447.48424,Cluster-26447.48425
GO:0015171	amino acid transmembrane transporter activity	molecular_function	0.11149	1	4	966	219	126097	Cluster-26447.119868,Cluster-26447.149497,Cluster-26447.158601,Cluster-26447.166736
GO:0016746	transferase activity, transferring acyl groups	molecular_function	0.11203	1	22	966	2076	126097	Cluster-26447.22523,Cluster-26447.933,Cluster-26447.46049,Cluster-26447.140493,Cluster-26447.22521,Cluster-26447.46051,Cluster-26447.55740,Cluster-26447.204181,Cluster-26447.138049,Cluster-8641.2,Cluster-26447.67052,Cluster-26447.123640,Cluster-26447.96220,Cluster-26447.190554,Cluster-26447.67834,Cluster-26447.147762,Cluster-8641.3,Cluster-26447.90686,Cluster-26447.1324,Cluster-26447.52943,Cluste…
GO:0000097	sulfur amino acid biosynthetic process	biological_process	0.1121	1	2	966	80	126097	Cluster-26447.46049,Cluster-26447.46051
GO:0033905	xylan endo-1,3-beta-xylosidase activity	molecular_function	0.11227	1	1	966	15	126097	Cluster-26447.191833
GO:0015035	protein disulfide oxidoreductase activity	molecular_function	0.11239	1	4	966	258	126097	Cluster-26447.111620,Cluster-26447.113291,Cluster-26447.35718,Cluster-26447.33592
GO:0015036	disulfide oxidoreductase activity	molecular_function	0.11239	1	4	966	258	126097	Cluster-26447.33592,Cluster-26447.113291,Cluster-26447.111620,Cluster-26447.35718
GO:0017150	tRNA dihydrouridine synthase activity	molecular_function	0.11284	1	2	966	78	126097	Cluster-26447.80998,Cluster-26447.98682
GO:0006302	double-strand break repair	biological_process	0.11294	1	4	966	211	126097	Cluster-26447.174995,Cluster-26447.111620,Cluster-26447.113291,Cluster-26447.110133
GO:0019050	suppression by virus of host apoptotic process	biological_process	0.11334	1	1	966	18	126097	Cluster-26447.86266
GO:0033668	negative regulation by symbiont of host apoptotic process	biological_process	0.11334	1	1	966	18	126097	Cluster-26447.86266
GO:0052041	negative regulation by symbiont of host programmed cell death	biological_process	0.11334	1	1	966	18	126097	Cluster-26447.86266
GO:0052490	negative regulation by organism of programmed cell death in other organism involved in symbiotic interaction	biological_process	0.11334	1	1	966	18	126097	Cluster-26447.86266
GO:0019784	NEDD8-specific protease activity	molecular_function	0.11357	1	1	966	20	126097	Cluster-26447.12834
GO:0039693	viral DNA genome replication	biological_process	0.11357	1	1	966	20	126097	Cluster-26447.12834
GO:0044034	multi-organism biosynthetic process	biological_process	0.11357	1	1	966	20	126097	Cluster-26447.12834
GO:0070011	peptidase activity, acting on L-amino acid peptides	molecular_function	0.11401	1	51	966	5176	126097	Cluster-26447.53809,Cluster-26447.66609,Cluster-26447.68826,Cluster-26447.11090,Cluster-26447.125929,Cluster-5663.1,Cluster-26447.118800,Cluster-26447.134629,Cluster-26447.37151,Cluster-26447.208230,Cluster-26447.123882,Cluster-26447.60366,Cluster-26447.22355,Cluster-26447.70052,Cluster-26447.56410,Cluster-26447.206479,Cluster-26447.117264,Cluster-26447.174150,Cluster-26447.60284,Cluster-26447.14…
GO:0000775	chromosome, centromeric region	cellular_component	0.11442	1	10	966	766	126097	Cluster-26447.184774,Cluster-26447.123519,Cluster-26447.34800,Cluster-26447.113291,Cluster-26447.133824,Cluster-26447.129960,Cluster-26447.111620,Cluster-26447.135888,Cluster-26447.133826,Cluster-26447.184773
GO:0006144	purine nucleobase metabolic process	biological_process	0.11488	1	21	966	1938	126097	Cluster-26447.10621,Cluster-26447.135875,Cluster-26447.127758,Cluster-26447.69821,Cluster-26447.113791,Cluster-26447.176499,Cluster-26447.205044,Cluster-26447.204304,Cluster-26447.85633,Cluster-26447.190134,Cluster-26447.146706,Cluster-26447.119323,Cluster-26447.141736,Cluster-26447.181772,Cluster-26447.203505,Cluster-26447.22355,Cluster-26447.110145,Cluster-26447.33049,Cluster-26447.65687,Cluste…
GO:0004788	thiamine diphosphokinase activity	molecular_function	0.11489	1	1	966	18	126097	Cluster-26447.84141
GO:0044267	cellular protein metabolic process	biological_process	0.11522	1	170	966	19215	126097	Cluster-26447.18331,Cluster-26447.173016,Cluster-26447.109000,Cluster-26447.57307,Cluster-26447.141050,Cluster-26447.177505,Cluster-26447.176793,Cluster-26447.91564,Cluster-26447.148206,Cluster-26447.181649,Cluster-26447.99255,Cluster-26447.82623,Cluster-26447.62499,Cluster-26447.203,Cluster-26447.48424,Cluster-26447.160118,Cluster-26447.159650,Cluster-26447.165798,Cluster-26447.12321,Cluster-264…
GO:0016903	oxidoreductase activity, acting on the aldehyde or oxo group of donors	molecular_function	0.11696	1	6	966	415	126097	Cluster-26447.8565,Cluster-26447.61261,Cluster-26447.8574,Cluster-26447.103408,Cluster-26447.198821,Cluster-26447.33566
GO:0047286	NAD+-diphthamide ADP-ribosyltransferase activity	molecular_function	0.11717	1	1	966	15	126097	Cluster-26447.138049
GO:0005742	mitochondrial outer membrane translocase complex	cellular_component	0.11743	1	4	966	214	126097	Cluster-26447.107535,Cluster-20433.0,Cluster-26447.43983,Cluster-26447.84696
GO:0003887	DNA-directed DNA polymerase activity	molecular_function	0.1177	1	9	966	623	126097	Cluster-26447.111493,Cluster-26447.113291,Cluster-26447.203494,Cluster-26447.53906,Cluster-26447.3666,Cluster-26447.207851,Cluster-26447.22371,Cluster-26447.111620,Cluster-26447.115132
GO:0009396	folic acid-containing compound biosynthetic process	biological_process	0.11812	1	5	966	316	126097	Cluster-26447.118364,Cluster-26447.113672,Cluster-26447.58690,Cluster-26447.84696,Cluster-26447.12358
GO:0006081	cellular aldehyde metabolic process	biological_process	0.11827	1	12	966	1090	126097	Cluster-26447.147762,Cluster-26447.724,Cluster-26447.153858,Cluster-26447.109452,Cluster-26447.98682,Cluster-26447.118364,Cluster-26447.148200,Cluster-26447.109344,Cluster-26447.12358,Cluster-26447.60729,Cluster-26447.84696,Cluster-26447.109407
GO:0006359	regulation of transcription from RNA polymerase III promoter	biological_process	0.11834	1	3	966	141	126097	Cluster-26447.129960,Cluster-26447.133824,Cluster-26447.133826
GO:0032957	inositol trisphosphate metabolic process	biological_process	0.11853	1	2	966	77	126097	Cluster-26447.115578,Cluster-26447.155828
GO:0043647	inositol phosphate metabolic process	biological_process	0.11853	1	2	966	77	126097	Cluster-26447.115578,Cluster-26447.155828
GO:0047325	inositol tetrakisphosphate 1-kinase activity	molecular_function	0.11853	1	2	966	77	126097	Cluster-26447.115578,Cluster-26447.155828
GO:0051765	inositol tetrakisphosphate kinase activity	molecular_function	0.11853	1	2	966	77	126097	Cluster-26447.155828,Cluster-26447.115578
GO:0052725	inositol-1,3,4-trisphosphate 6-kinase activity	molecular_function	0.11853	1	2	966	77	126097	Cluster-26447.115578,Cluster-26447.155828
GO:0052726	inositol-1,3,4-trisphosphate 5-kinase activity	molecular_function	0.11853	1	2	966	77	126097	Cluster-26447.115578,Cluster-26447.155828
GO:0044215	other organism	cellular_component	0.11995	1	13	966	1107	126097	Cluster-26447.146706,Cluster-26447.61385,Cluster-26447.142660,Cluster-26447.181772,Cluster-26447.48424,Cluster-26447.73778,Cluster-26447.48974,Cluster-26447.169437,Cluster-26447.101528,Cluster-26447.48972,Cluster-26447.48975,Cluster-26447.48425,Cluster-26447.164857
GO:0044216	other organism cell	cellular_component	0.11995	1	13	966	1107	126097	Cluster-26447.146706,Cluster-26447.61385,Cluster-26447.181772,Cluster-26447.142660,Cluster-26447.48972,Cluster-26447.101528,Cluster-26447.48975,Cluster-26447.48974,Cluster-26447.48424,Cluster-26447.73778,Cluster-26447.169437,Cluster-26447.48425,Cluster-26447.164857
GO:0044217	other organism part	cellular_component	0.11995	1	13	966	1107	126097	Cluster-26447.48975,Cluster-26447.48972,Cluster-26447.101528,Cluster-26447.169437,Cluster-26447.73778,Cluster-26447.48424,Cluster-26447.48974,Cluster-26447.164857,Cluster-26447.48425,Cluster-26447.61385,Cluster-26447.146706,Cluster-26447.181772,Cluster-26447.142660
GO:0008652	cellular amino acid biosynthetic process	biological_process	0.12029	1	18	966	1688	126097	Cluster-26447.187623,Cluster-26447.98682,Cluster-26447.12358,Cluster-26447.185243,Cluster-26447.84696,Cluster-26447.48824,Cluster-26447.200419,Cluster-26447.46049,Cluster-26447.46051,Cluster-26447.44385,Cluster-26447.118364,Cluster-26447.207435,Cluster-26447.58690,Cluster-26447.8416,Cluster-26447.1470,Cluster-26447.113672,Cluster-26447.108565,Cluster-26447.200422
GO:0000128	flocculation	biological_process	0.12032	1	1	966	10	126097	Cluster-26447.111493
GO:0098630	aggregation of unicellular organisms	biological_process	0.12032	1	1	966	10	126097	Cluster-26447.111493
GO:0098743	cell aggregation	biological_process	0.12032	1	1	966	10	126097	Cluster-26447.111493
GO:0008982	protein-N(PI)-phosphohistidine-sugar phosphotransferase activity	molecular_function	0.12037	1	3	966	157	126097	Cluster-26447.74407,Cluster-26447.130453,Cluster-26447.26018
GO:0009357	protein-N(PI)-phosphohistidine-sugar phosphotransferase complex	cellular_component	0.12037	1	3	966	157	126097	Cluster-26447.130453,Cluster-26447.74407,Cluster-26447.26018
GO:0097599	xylanase activity	molecular_function	0.12079	1	1	966	17	126097	Cluster-26447.191833
GO:0006396	RNA processing	biological_process	0.12261	1	44	966	4244	126097	Cluster-26447.61385,Cluster-26447.190134,Cluster-26447.146700,Cluster-26447.125593,Cluster-26447.73778,Cluster-26447.164912,Cluster-26447.85436,Cluster-26447.48330,Cluster-26447.135627,Cluster-26447.53906,Cluster-26447.58618,Cluster-26447.9847,Cluster-26447.80998,Cluster-26447.184313,Cluster-26447.165528,Cluster-26447.140820,Cluster-26447.181705,Cluster-26447.123064,Cluster-26447.57410,Cluster-26…
GO:0000746	conjugation	biological_process	0.12291	1	3	966	151	126097	Cluster-26447.12299,Cluster-26447.208164,Cluster-26447.111580
GO:0005549	odorant binding	molecular_function	0.12309	1	1	966	20	126097	Cluster-26447.156997
GO:0006206	pyrimidine nucleobase metabolic process	biological_process	0.12362	1	16	966	1402	126097	Cluster-26447.204304,Cluster-26447.205044,Cluster-26447.141736,Cluster-26447.204182,Cluster-26447.181772,Cluster-26447.159125,Cluster-26447.127758,Cluster-26447.135875,Cluster-26447.113791,Cluster-26447.140660,Cluster-26447.9447,Cluster-26447.162631,Cluster-26447.165528,Cluster-26447.110145,Cluster-26447.100182,Cluster-26447.75347
GO:0019054	modulation by virus of host process	biological_process	0.12369	1	2	966	91	126097	Cluster-26447.33592,Cluster-26447.86266
GO:0044068	modulation by symbiont of host cellular process	biological_process	0.12369	1	2	966	91	126097	Cluster-26447.33592,Cluster-26447.86266
GO:0005507	copper ion binding	molecular_function	0.12396	1	7	966	528	126097	Cluster-26447.137118,Cluster-26447.100703,Cluster-4675.0,Cluster-26447.70648,Cluster-26447.109529,Cluster-26447.79310,Cluster-26447.131610
GO:0030246	carbohydrate binding	molecular_function	0.12425	1	12	966	975	126097	Cluster-26447.53906,Cluster-26447.179601,Cluster-12542.0,Cluster-26447.194966,Cluster-26447.62479,Cluster-26447.110145,Cluster-1093.1,Cluster-26447.58259,Cluster-26447.6629,Cluster-1093.2,Cluster-26447.18331,Cluster-936.1
GO:0008483	transaminase activity	molecular_function	0.12564	1	3	966	168	126097	Cluster-26447.128951,Cluster-26447.125048,Cluster-26447.145625
GO:0004806	triglyceride lipase activity	molecular_function	0.12687	1	2	966	60	126097	Cluster-26447.86326,Cluster-26447.83904
GO:0005375	copper ion transmembrane transporter activity	molecular_function	0.12746	1	2	966	65	126097	Cluster-26447.48334,Cluster-26447.48330
GO:0035434	copper ion transmembrane transport	biological_process	0.12746	1	2	966	65	126097	Cluster-26447.48334,Cluster-26447.48330
GO:0004345	glucose-6-phosphate dehydrogenase activity	molecular_function	0.12788	1	2	966	87	126097	Cluster-26447.60729,Cluster-26447.109452
GO:1901566	organonitrogen compound biosynthetic process	biological_process	0.12881	1	86	966	9890	126097	Cluster-26447.102068,Cluster-26447.44385,Cluster-26447.129937,Cluster-26447.99294,Cluster-26447.204182,Cluster-26447.174995,Cluster-26447.200422,Cluster-26447.45139,Cluster-26447.42104,Cluster-26447.83904,Cluster-26447.140820,Cluster-26447.29217,Cluster-26447.122861,Cluster-26447.140660,Cluster-26447.187623,Cluster-26447.59916,Cluster-26447.118735,Cluster-26447.48824,Cluster-26447.12358,Cluster-2…
GO:0006528	asparagine metabolic process	biological_process	0.12933	1	2	966	74	126097	Cluster-26447.200422,Cluster-26447.200419
GO:0006220	pyrimidine nucleotide metabolic process	biological_process	0.12949	1	4	966	247	126097	Cluster-26447.204182,Cluster-26447.75347,Cluster-26447.100182,Cluster-26447.165528
GO:0070071	proton-transporting two-sector ATPase complex assembly	biological_process	0.13015	1	2	966	70	126097	Cluster-26447.131610,Cluster-26447.109529
GO:0065008	regulation of biological quality	biological_process	0.13323	1	37	966	3868	126097	Cluster-26447.57660,Cluster-26447.83904,Cluster-26447.20884,Cluster-26447.181330,Cluster-1202.0,Cluster-26447.46049,Cluster-26447.204994,Cluster-26447.111620,Cluster-26447.35718,Cluster-26447.57657,Cluster-26447.95406,Cluster-26447.165876,Cluster-26447.33592,Cluster-26447.12358,Cluster-26447.83472,Cluster-26447.105501,Cluster-26447.39092,Cluster-26447.77676,Cluster-26447.53809,Cluster-26447.12316…
GO:0008514	organic anion transmembrane transporter activity	molecular_function	0.13404	1	5	966	335	126097	Cluster-26447.158601,Cluster-26447.149497,Cluster-26447.166736,Cluster-26447.119868,Cluster-26447.58259
GO:0010467	gene expression	biological_process	0.1369	1	186	966	21617	126097	Cluster-26447.87879,Cluster-26447.91562,Cluster-26447.113937,Cluster-26447.113291,Cluster-26447.101528,Cluster-26447.127758,Cluster-26447.75195,Cluster-26447.160578,Cluster-26447.94858,Cluster-26447.123519,Cluster-26447.164716,Cluster-26447.64499,Cluster-26447.45138,Cluster-748.0,Cluster-26447.110145,Cluster-26447.3666,Cluster-26447.147095,Cluster-26447.33687,Cluster-26447.105017,Cluster-26447.18…
GO:0042559	pteridine-containing compound biosynthetic process	biological_process	0.13864	1	5	966	333	126097	Cluster-26447.118364,Cluster-26447.113672,Cluster-26447.84696,Cluster-26447.12358,Cluster-26447.58690
GO:0008091	spectrin	cellular_component	0.14234	1	1	966	20	126097	Cluster-26447.9136
GO:0030507	spectrin binding	molecular_function	0.14234	1	1	966	20	126097	Cluster-26447.9136
GO:0019882	antigen processing and presentation	biological_process	0.14265	1	2	966	86	126097	Cluster-26447.114501,Cluster-26447.79081
GO:0004169	dolichyl-phosphate-mannose-protein mannosyltransferase activity	molecular_function	0.14326	1	1	966	22	126097	Cluster-26447.13906
GO:0035268	protein mannosylation	biological_process	0.14326	1	1	966	22	126097	Cluster-26447.13906
GO:0035269	protein O-linked mannosylation	biological_process	0.14326	1	1	966	22	126097	Cluster-26447.13906
GO:0097502	mannosylation	biological_process	0.14326	1	1	966	22	126097	Cluster-26447.13906
GO:0042181	ketone biosynthetic process	biological_process	0.14492	1	5	966	363	126097	Cluster-26447.96215,Cluster-26447.84141,Cluster-26447.69158,Cluster-26447.99447,Cluster-26447.56410
GO:0008219	cell death	biological_process	0.14532	1	7	966	516	126097	Cluster-26447.146841,Cluster-26447.73989,Cluster-26447.52385,Cluster-26447.74891,Cluster-26447.86266,Cluster-26447.94358,Cluster-4869.0
GO:0016265	death	biological_process	0.14532	1	7	966	516	126097	Cluster-26447.73989,Cluster-26447.52385,Cluster-26447.146841,Cluster-26447.74891,Cluster-26447.86266,Cluster-26447.94358,Cluster-4869.0
GO:0048472	threonine-phosphate decarboxylase activity	molecular_function	0.14572	1	1	966	16	126097	Cluster-26447.216733
GO:0016161	beta-amylase activity	molecular_function	0.14618	1	2	966	82	126097	Cluster-26447.135625,Cluster-26447.135627
GO:0044249	cellular biosynthetic process	biological_process	0.1462	1	236	966	27832	126097	Cluster-26447.724,Cluster-26447.141736,Cluster-26447.81217,Cluster-26447.12834,Cluster-26447.122713,Cluster-26447.155056,Cluster-26447.118198,Cluster-26447.163880,Cluster-26447.48425,Cluster-26447.38965,Cluster-26447.135875,Cluster-26447.159203,Cluster-26447.172844,Cluster-26447.169437,Cluster-26447.94856,Cluster-26447.27742,Cluster-8641.3,Cluster-26447.127427,Cluster-26447.147946,Cluster-26447.9…
GO:0098799	outer mitochondrial membrane protein complex	cellular_component	0.14654	1	4	966	235	126097	Cluster-20433.0,Cluster-26447.107535,Cluster-26447.43983,Cluster-26447.84696
GO:0005157	macrophage colony-stimulating factor receptor binding	molecular_function	0.14664	1	1	966	15	126097	Cluster-26447.163186
GO:0009228	thiamine biosynthetic process	biological_process	0.14714	1	2	966	98	126097	Cluster-26447.1470,Cluster-26447.8416
GO:0042724	thiamine-containing compound biosynthetic process	biological_process	0.14714	1	2	966	98	126097	Cluster-26447.8416,Cluster-26447.1470
GO:0009058	biosynthetic process	biological_process	0.14724	1	255	966	30312	126097	Cluster-26447.112768,Cluster-26447.147095,Cluster-26447.110145,Cluster-26447.3666,Cluster-26447.120331,Cluster-26447.115264,Cluster-26447.105017,Cluster-26447.57664,Cluster-26447.200419,Cluster-26447.26494,Cluster-26447.143611,Cluster-26447.84696,Cluster-26447.94229,Cluster-26447.13906,Cluster-26447.58449,Cluster-26447.21121,Cluster-26447.120543,Cluster-26447.164716,Cluster-26447.88210,Cluster-26…
GO:0039526	modulation by virus of host apoptotic process	biological_process	0.148	1	1	966	23	126097	Cluster-26447.86266
GO:0044531	modulation of programmed cell death in other organism	biological_process	0.148	1	1	966	23	126097	Cluster-26447.86266
GO:0044532	modulation of apoptotic process in other organism	biological_process	0.148	1	1	966	23	126097	Cluster-26447.86266
GO:0052040	modulation by symbiont of host programmed cell death	biological_process	0.148	1	1	966	23	126097	Cluster-26447.86266
GO:0052150	modulation by symbiont of host apoptotic process	biological_process	0.148	1	1	966	23	126097	Cluster-26447.86266
GO:0052248	modulation of programmed cell death in other organism involved in symbiotic interaction	biological_process	0.148	1	1	966	23	126097	Cluster-26447.86266
GO:0052433	modulation by organism of apoptotic process in other organism involved in symbiotic interaction	biological_process	0.148	1	1	966	23	126097	Cluster-26447.86266
GO:0072524	pyridine-containing compound metabolic process	biological_process	0.14983	1	14	966	1356	126097	Cluster-26447.60729,Cluster-26447.109407,Cluster-26447.155054,Cluster-26447.108565,Cluster-26447.155053,Cluster-26447.153858,Cluster-26447.155043,Cluster-26447.724,Cluster-26447.197288,Cluster-26447.148200,Cluster-26447.109344,Cluster-26447.109452,Cluster-26447.98682,Cluster-26447.155056
GO:0001948	glycoprotein binding	molecular_function	0.15	1	1	966	18	126097	Cluster-26447.125216
GO:0043394	proteoglycan binding	molecular_function	0.15	1	1	966	18	126097	Cluster-26447.125216
GO:0043395	heparan sulfate proteoglycan binding	molecular_function	0.15	1	1	966	18	126097	Cluster-26447.125216
GO:0009260	ribonucleotide biosynthetic process	biological_process	0.15056	1	10	966	867	126097	Cluster-26447.69821,Cluster-26447.75347,Cluster-26447.120543,Cluster-26447.85633,Cluster-26447.165528,Cluster-26447.102199,Cluster-26447.204182,Cluster-26447.10933,Cluster-26447.118735,Cluster-26447.10934
GO:0046390	ribose phosphate biosynthetic process	biological_process	0.15056	1	10	966	867	126097	Cluster-26447.102199,Cluster-26447.204182,Cluster-26447.10933,Cluster-26447.118735,Cluster-26447.10934,Cluster-26447.120543,Cluster-26447.85633,Cluster-26447.165528,Cluster-26447.69821,Cluster-26447.75347
GO:0016843	amine-lyase activity	molecular_function	0.15123	1	2	966	80	126097	Cluster-26447.103544,Cluster-26447.169437
GO:0016844	strictosidine synthase activity	molecular_function	0.15123	1	2	966	80	126097	Cluster-26447.103544,Cluster-26447.169437
GO:0042431	indole metabolic process	biological_process	0.15123	1	2	966	80	126097	Cluster-26447.169437,Cluster-26447.103544
GO:0042432	indole biosynthetic process	biological_process	0.15123	1	2	966	80	126097	Cluster-26447.169437,Cluster-26447.103544
GO:0007169	transmembrane receptor protein tyrosine kinase signaling pathway	biological_process	0.15208	1	1	966	25	126097	Cluster-26447.211242
GO:0042575	DNA polymerase complex	cellular_component	0.15304	1	11	966	870	126097	Cluster-26447.216958,Cluster-26447.111493,Cluster-26447.113291,Cluster-26447.203494,Cluster-26447.53906,Cluster-26447.122456,Cluster-26447.3666,Cluster-26447.22371,Cluster-26447.115132,Cluster-26447.111620,Cluster-26447.207851
GO:0010827	regulation of glucose transport	biological_process	0.1534	1	1	966	17	126097	Cluster-26447.75058
GO:0010829	negative regulation of glucose transport	biological_process	0.1534	1	1	966	17	126097	Cluster-26447.75058
GO:0015758	glucose transport	biological_process	0.1534	1	1	966	17	126097	Cluster-26447.75058
GO:0046323	glucose import	biological_process	0.1534	1	1	966	17	126097	Cluster-26447.75058
GO:0046324	regulation of glucose import	biological_process	0.1534	1	1	966	17	126097	Cluster-26447.75058
GO:0046325	negative regulation of glucose import	biological_process	0.1534	1	1	966	17	126097	Cluster-26447.75058
GO:0006760	folic acid-containing compound metabolic process	biological_process	0.15472	1	5	966	342	126097	Cluster-26447.58690,Cluster-26447.84696,Cluster-26447.12358,Cluster-26447.118364,Cluster-26447.113672
GO:0004175	endopeptidase activity	molecular_function	0.15551	1	34	966	3448	126097	Cluster-26447.130231,Cluster-26447.170430,Cluster-26447.173016,Cluster-26447.124528,Cluster-26447.119474,Cluster-26447.1354,Cluster-26447.43676,Cluster-26447.26765,Cluster-26447.84716,Cluster-26447.114635,Cluster-26447.38965,Cluster-26447.53809,Cluster-26447.68826,Cluster-26447.66609,Cluster-26447.118800,Cluster-5663.1,Cluster-26447.125929,Cluster-26447.134629,Cluster-26447.60366,Cluster-26447.12…
GO:0000124	SAGA complex	cellular_component	0.15566	1	1	966	17	126097	Cluster-26447.117280
GO:0004470	malic enzyme activity	molecular_function	0.15577	1	3	966	129	126097	Cluster-26447.117840,Cluster-26447.91395,Cluster-26447.42067
GO:0004471	malate dehydrogenase (decarboxylating) (NAD+) activity	molecular_function	0.15577	1	3	966	129	126097	Cluster-26447.42067,Cluster-26447.91395,Cluster-26447.117840
GO:0006108	malate metabolic process	biological_process	0.15577	1	3	966	129	126097	Cluster-26447.42067,Cluster-26447.91395,Cluster-26447.117840
GO:0005840	ribosome	cellular_component	0.15593	1	34	966	4001	126097	Cluster-26447.209963,Cluster-26447.107355,Cluster-26447.102600,Cluster-26447.144646,Cluster-26447.83005,Cluster-26447.140820,Cluster-26447.122861,Cluster-26447.29217,Cluster-26447.124497,Cluster-26447.127219,Cluster-26447.45139,Cluster-26447.42104,Cluster-26447.113331,Cluster-26447.117627,Cluster-26447.129937,Cluster-26447.99213,Cluster-26447.99294,Cluster-26447.174995,Cluster-26447.62499,Cluster…
GO:0031047	gene silencing by RNA	biological_process	0.15642	1	2	966	86	126097	Cluster-26447.10814,Cluster-27328.1
GO:1990542	mitochondrial transmembrane transport	biological_process	0.15685	1	3	966	171	126097	Cluster-26447.43983,Cluster-20433.0,Cluster-26447.107535
GO:0004659	prenyltransferase activity	molecular_function	0.15711	1	4	966	249	126097	Cluster-26447.173555,Cluster-26447.206350,Cluster-26447.114501,Cluster-26447.92151
GO:0071806	protein transmembrane transport	biological_process	0.15733	1	4	966	275	126097	Cluster-26447.43983,Cluster-20433.0,Cluster-26447.107535,Cluster-26447.83904
GO:0046813	receptor-mediated virion attachment to host cell	biological_process	0.16025	1	1	966	23	126097	Cluster-26447.157586
GO:0032787	monocarboxylic acid metabolic process	biological_process	0.16182	1	27	966	2740	126097	Cluster-26447.155043,Cluster-26447.97817,Cluster-26447.127427,Cluster-26447.123064,Cluster-26447.118735,Cluster-26447.147762,Cluster-26447.109344,Cluster-26447.98682,Cluster-26447.135732,Cluster-26447.123640,Cluster-26447.91395,Cluster-26447.117840,Cluster-26447.42067,Cluster-26447.12358,Cluster-26447.84696,Cluster-26447.155054,Cluster-26447.109407,Cluster-26447.112768,Cluster-26447.153858,Cluste…
GO:0016703	oxidoreductase activity, acting on single donors with incorporation of molecular oxygen, incorporation of one atom of oxygen (internal monooxygenases or internal mixed function oxidases)	molecular_function	0.16194	1	2	966	120	126097	Cluster-26447.6629,Cluster-26447.98682
GO:0071704	organic substance metabolic process	biological_process	0.16226	1	486	966	58548	126097	Cluster-26447.130207,Cluster-26447.144650,Cluster-26447.111429,Cluster-26447.90419,Cluster-26447.171231,Cluster-26447.11533,Cluster-8591.0,Cluster-26447.73778,Cluster-26447.207741,Cluster-26447.146700,Cluster-26447.84141,Cluster-26447.153433,Cluster-26447.146706,Cluster-26447.181675,Cluster-26447.85633,Cluster-26447.207435,Cluster-26447.111205,Cluster-26447.103231,Cluster-26447.83005,Cluster-2644…
GO:0052689	carboxylic ester hydrolase activity	molecular_function	0.16244	1	6	966	460	126097	Cluster-26447.91562,Cluster-26447.86326,Cluster-26447.86173,Cluster-26447.173733,Cluster-26447.83904,Cluster-26447.91564
GO:0016779	nucleotidyltransferase activity	molecular_function	0.16464	1	29	966	2807	126097	Cluster-26447.203494,Cluster-26447.53906,Cluster-26447.176499,Cluster-26447.113791,Cluster-26447.135875,Cluster-26447.127758,Cluster-26447.10621,Cluster-26447.181772,Cluster-26447.141736,Cluster-26447.119323,Cluster-26447.204617,Cluster-26447.146706,Cluster-26447.113291,Cluster-26447.204304,Cluster-26447.205044,Cluster-26447.207851,Cluster-26447.115132,Cluster-26447.33049,Cluster-26447.22371,Clus…
GO:0044283	small molecule biosynthetic process	biological_process	0.1649	1	35	966	3733	126097	Cluster-26447.53906,Cluster-26447.9847,Cluster-26447.113672,Cluster-26447.200422,Cluster-26447.46049,Cluster-26447.84141,Cluster-26447.85633,Cluster-26447.207435,Cluster-26447.44385,Cluster-26447.12358,Cluster-26447.185243,Cluster-26447.48824,Cluster-26447.99447,Cluster-26447.56410,Cluster-26447.118735,Cluster-26447.187623,Cluster-26447.197288,Cluster-26447.58690,Cluster-26447.8416,Cluster-26447.…
GO:0008083	growth factor activity	molecular_function	0.16536	1	3	966	188	126097	Cluster-31356.0,Cluster-26447.179322,Cluster-26447.22371
GO:0040011	locomotion	biological_process	0.16566	1	12	966	1066	126097	Cluster-26447.147946,Cluster-26447.208563,Cluster-26447.53497,Cluster-26447.216685,Cluster-26447.54173,Cluster-26447.197869,Cluster-26447.197252,Cluster-26447.135888,Cluster-26447.73778,Cluster-26447.48974,Cluster-26447.48975,Cluster-26447.48972
GO:0008237	metallopeptidase activity	molecular_function	0.16623	1	10	966	797	126097	Cluster-26447.134629,Cluster-26447.119474,Cluster-26447.84716,Cluster-26447.56410,Cluster-26447.1354,Cluster-26447.117264,Cluster-26447.90351,Cluster-26447.170430,Cluster-26447.118800,Cluster-26447.125929
GO:0007610	behavior	biological_process	0.16628	1	3	966	172	126097	Cluster-26447.46051,Cluster-26447.46049,Cluster-26447.19284
GO:0004383	guanylate cyclase activity	molecular_function	0.16655	1	1	966	24	126097	Cluster-26447.85633
GO:0006182	cGMP biosynthetic process	biological_process	0.16655	1	1	966	24	126097	Cluster-26447.85633
GO:0046068	cGMP metabolic process	biological_process	0.16655	1	1	966	24	126097	Cluster-26447.85633
GO:0021549	cerebellum development	biological_process	0.16668	1	1	966	20	126097	Cluster-26447.173511
GO:0022037	metencephalon development	biological_process	0.16668	1	1	966	20	126097	Cluster-26447.173511
GO:0030902	hindbrain development	biological_process	0.16668	1	1	966	20	126097	Cluster-26447.173511
GO:0098655	cation transmembrane transport	biological_process	0.16683	1	18	966	1683	126097	Cluster-26447.120543,Cluster-26447.77712,Cluster-26447.10933,Cluster-26447.10934,Cluster-26447.163186,Cluster-26447.48334,Cluster-26447.22371,Cluster-26447.2402,Cluster-26447.114984,Cluster-26447.207713,Cluster-26447.140126,Cluster-26447.56531,Cluster-26447.125377,Cluster-26447.164912,Cluster-26447.48330,Cluster-26447.66043,Cluster-26447.66517,Cluster-26447.11686
GO:0015708	silicate transport	biological_process	0.16692	1	1	966	23	126097	Cluster-26447.88210
GO:0050776	regulation of immune response	biological_process	0.16916	1	3	966	190	126097	Cluster-26447.164902,Cluster-26447.204930,Cluster-26447.212720
GO:0044238	primary metabolic process	biological_process	0.16926	1	468	966	56170	126097	Cluster-26447.57410,Cluster-26447.127219,Cluster-26447.113900,Cluster-26447.63019,Cluster-26447.66120,Cluster-26447.68826,Cluster-26447.39092,Cluster-26447.117596,Cluster-26447.11090,Cluster-26447.118800,Cluster-26447.19284,Cluster-26447.112972,Cluster-26447.178802,Cluster-26447.134629,Cluster-26447.45949,Cluster-26447.50022,Cluster-26447.107804,Cluster-26447.9960,Cluster-26447.74527,Cluster-2644…
GO:0006766	vitamin metabolic process	biological_process	0.1694	1	17	966	1585	126097	Cluster-26447.155043,Cluster-26447.118735,Cluster-26447.197288,Cluster-26447.98682,Cluster-26447.162961,Cluster-26447.155054,Cluster-26447.84141,Cluster-26447.724,Cluster-26447.155056,Cluster-26447.216733,Cluster-26447.745,Cluster-26447.58690,Cluster-26447.8416,Cluster-26447.53906,Cluster-26447.155053,Cluster-26447.113672,Cluster-26447.1470
GO:0006767	water-soluble vitamin metabolic process	biological_process	0.1694	1	17	966	1585	126097	Cluster-26447.84141,Cluster-26447.724,Cluster-26447.216733,Cluster-26447.155056,Cluster-26447.745,Cluster-26447.53906,Cluster-26447.8416,Cluster-26447.58690,Cluster-26447.1470,Cluster-26447.155053,Cluster-26447.113672,Cluster-26447.118735,Cluster-26447.155043,Cluster-26447.98682,Cluster-26447.197288,Cluster-26447.155054,Cluster-26447.162961
GO:0030260	entry into host cell	biological_process	0.16951	1	3	966	175	126097	Cluster-26447.48974,Cluster-26447.48975,Cluster-26447.48972
GO:0044409	entry into host	biological_process	0.16951	1	3	966	175	126097	Cluster-26447.48975,Cluster-26447.48972,Cluster-26447.48974
GO:0046718	viral entry into host cell	biological_process	0.16951	1	3	966	175	126097	Cluster-26447.48975,Cluster-26447.48972,Cluster-26447.48974
GO:0051806	entry into cell of other organism involved in symbiotic interaction	biological_process	0.16951	1	3	966	175	126097	Cluster-26447.48974,Cluster-26447.48975,Cluster-26447.48972
GO:0051828	entry into other organism involved in symbiotic interaction	biological_process	0.16951	1	3	966	175	126097	Cluster-26447.48972,Cluster-26447.48975,Cluster-26447.48974
GO:0042626	ATPase activity, coupled to transmembrane movement of substances	molecular_function	0.16978	1	10	966	742	126097	Cluster-26447.129949,Cluster-26447.150239,Cluster-26447.84250,Cluster-26447.79310,Cluster-26447.86962,Cluster-26447.60113,Cluster-26447.137118,Cluster-26447.120543,Cluster-26447.67181,Cluster-26447.86969
GO:0043492	ATPase activity, coupled to movement of substances	molecular_function	0.16978	1	10	966	742	126097	Cluster-26447.120543,Cluster-26447.86969,Cluster-26447.67181,Cluster-26447.137118,Cluster-26447.60113,Cluster-26447.86962,Cluster-26447.79310,Cluster-26447.84250,Cluster-26447.150239,Cluster-26447.129949
GO:0008233	peptidase activity	molecular_function	0.17097	1	53	966	5612	126097	Cluster-26447.147570,Cluster-26447.197252,Cluster-26447.130194,Cluster-26447.163880,Cluster-26447.26765,Cluster-26447.38965,Cluster-26447.114635,Cluster-26447.84716,Cluster-26447.40114,Cluster-26447.1354,Cluster-26447.119323,Cluster-26447.43676,Cluster-26447.12834,Cluster-26447.91562,Cluster-26447.65428,Cluster-26447.119474,Cluster-26447.26494,Cluster-26447.112036,Cluster-26447.91564,Cluster-969.…
GO:0008645	hexose transport	biological_process	0.17232	1	1	966	19	126097	Cluster-26447.75058
GO:0045087	innate immune response	biological_process	0.17269	1	2	966	101	126097	Cluster-26447.212720,Cluster-26447.191579
GO:0006865	amino acid transport	biological_process	0.17301	1	5	966	365	126097	Cluster-26447.158601,Cluster-26447.166736,Cluster-26447.149497,Cluster-26447.119868,Cluster-26447.76180
GO:0016071	mRNA metabolic process	biological_process	0.17328	1	16	966	1477	126097	Cluster-26447.101528,Cluster-26447.73778,Cluster-26447.85436,Cluster-26447.135627,Cluster-26447.94538,Cluster-26447.58618,Cluster-26447.61385,Cluster-26447.26693,Cluster-26447.182885,Cluster-26447.135625,Cluster-26447.113691,Cluster-26447.50022,Cluster-26447.75058,Cluster-26447.181705,Cluster-26447.140820,Cluster-26447.94540
GO:0007409	axonogenesis	biological_process	0.17338	1	2	966	91	126097	Cluster-26447.208563,Cluster-26447.216685
GO:0007411	axon guidance	biological_process	0.17338	1	2	966	91	126097	Cluster-26447.208563,Cluster-26447.216685
GO:0048667	cell morphogenesis involved in neuron differentiation	biological_process	0.17338	1	2	966	91	126097	Cluster-26447.216685,Cluster-26447.208563
GO:0048812	neuron projection morphogenesis	biological_process	0.17338	1	2	966	91	126097	Cluster-26447.208563,Cluster-26447.216685
GO:0061564	axon development	biological_process	0.17338	1	2	966	91	126097	Cluster-26447.208563,Cluster-26447.216685
GO:0097485	neuron projection guidance	biological_process	0.17338	1	2	966	91	126097	Cluster-26447.208563,Cluster-26447.216685
GO:0001614	purinergic nucleotide receptor activity	molecular_function	0.1738	1	1	966	23	126097	Cluster-26447.56531
GO:0004931	extracellular ATP-gated cation channel activity	molecular_function	0.1738	1	1	966	23	126097	Cluster-26447.56531
GO:0014074	response to purine-containing compound	biological_process	0.1738	1	1	966	23	126097	Cluster-26447.56531
GO:0016502	nucleotide receptor activity	molecular_function	0.1738	1	1	966	23	126097	Cluster-26447.56531
GO:0033198	response to ATP	biological_process	0.1738	1	1	966	23	126097	Cluster-26447.56531
GO:0035381	ATP-gated ion channel activity	molecular_function	0.1738	1	1	966	23	126097	Cluster-26447.56531
GO:0035586	purinergic receptor activity	molecular_function	0.1738	1	1	966	23	126097	Cluster-26447.56531
GO:0046683	response to organophosphorus	biological_process	0.1738	1	1	966	23	126097	Cluster-26447.56531
GO:0005876	spindle microtubule	cellular_component	0.17446	1	3	966	155	126097	Cluster-26447.184773,Cluster-26447.34800,Cluster-26447.184774
GO:0006839	mitochondrial transport	biological_process	0.17467	1	4	966	274	126097	Cluster-26447.12529,Cluster-26447.43983,Cluster-20433.0,Cluster-26447.107535
GO:0006351	transcription, DNA-templated	biological_process	0.17575	1	112	966	12712	126097	Cluster-26447.94229,Cluster-26447.143611,Cluster-26447.26494,Cluster-26447.114984,Cluster-26447.105017,Cluster-26447.186121,Cluster-26447.110145,Cluster-26447.3666,Cluster-26447.147095,Cluster-748.0,Cluster-26447.13031,Cluster-26447.123519,Cluster-26447.164716,Cluster-26447.142960,Cluster-26447.94858,Cluster-26447.155828,Cluster-26447.160578,Cluster-26447.115609,Cluster-26447.190563,Cluster-26447…
GO:0097659	nucleic acid-templated transcription	biological_process	0.17575	1	112	966	12712	126097	Cluster-26447.133826,Cluster-26447.127758,Cluster-26447.190563,Cluster-26447.115609,Cluster-26447.160578,Cluster-26447.142960,Cluster-26447.94858,Cluster-26447.155828,Cluster-26447.111366,Cluster-26447.87879,Cluster-26447.113291,Cluster-26447.57455,Cluster-26447.46051,Cluster-26447.106016,Cluster-26447.147095,Cluster-26447.110145,Cluster-26447.3666,Cluster-26447.186121,Cluster-26447.105017,Cluste…
GO:0015144	carbohydrate transmembrane transporter activity	molecular_function	0.17578	1	5	966	375	126097	Cluster-26447.26018,Cluster-26447.58259,Cluster-26447.152478,Cluster-26447.74407,Cluster-26447.130453
GO:1901476	carbohydrate transporter activity	molecular_function	0.17578	1	5	966	375	126097	Cluster-26447.130453,Cluster-26447.74407,Cluster-26447.152478,Cluster-26447.58259,Cluster-26447.26018
GO:0016413	O-acetyltransferase activity	molecular_function	0.17674	1	2	966	79	126097	Cluster-26447.46049,Cluster-26447.46051
GO:0004252	serine-type endopeptidase activity	molecular_function	0.17832	1	10	966	932	126097	Cluster-26447.173016,Cluster-26447.66609,Cluster-26447.43676,Cluster-26447.130231,Cluster-26447.53809,Cluster-26447.38965,Cluster-26447.10621,Cluster-26447.40614,Cluster-26447.107160,Cluster-26447.60366
GO:0042180	cellular ketone metabolic process	biological_process	0.17835	1	5	966	393	126097	Cluster-26447.99447,Cluster-26447.56410,Cluster-26447.69158,Cluster-26447.84141,Cluster-26447.96215
GO:0009627	systemic acquired resistance	biological_process	0.17914	1	1	966	34	126097	Cluster-26447.212720
GO:0009814	defense response, incompatible interaction	biological_process	0.17914	1	1	966	34	126097	Cluster-26447.212720
GO:0010112	regulation of systemic acquired resistance	biological_process	0.17914	1	1	966	34	126097	Cluster-26447.212720
GO:0009036	Type II site-specific deoxyribonuclease activity	molecular_function	0.18272	1	3	966	156	126097	Cluster-26447.212926,Cluster-26447.69821,Cluster-26447.107555
GO:0009359	Type II site-specific deoxyribonuclease complex	cellular_component	0.18272	1	3	966	156	126097	Cluster-26447.212926,Cluster-26447.69821,Cluster-26447.107555
GO:0015666	restriction endodeoxyribonuclease activity	molecular_function	0.18272	1	3	966	156	126097	Cluster-26447.107555,Cluster-26447.212926,Cluster-26447.69821
GO:0030254	protein secretion by the type III secretion system	biological_process	0.18355	1	1	966	20	126097	Cluster-26447.83904
GO:0030257	type III protein secretion system complex	cellular_component	0.18355	1	1	966	20	126097	Cluster-26447.83904
GO:0016458	gene silencing	biological_process	0.18361	1	2	966	94	126097	Cluster-27328.1,Cluster-26447.10814
GO:0001664	G-protein coupled receptor binding	molecular_function	0.1855	1	2	966	113	126097	Cluster-26447.72014,Cluster-26447.175970
GO:0042592	homeostatic process	biological_process	0.18552	1	16	966	1648	126097	Cluster-1202.0,Cluster-26447.88215,Cluster-26447.113291,Cluster-26447.56531,Cluster-26447.167194,Cluster-26447.33592,Cluster-26447.35718,Cluster-26447.182885,Cluster-26447.33049,Cluster-26447.111620,Cluster-26447.95406,Cluster-26447.100182,Cluster-1202.1,Cluster-26447.123161,Cluster-26447.105501,Cluster-26447.77676
GO:0004366	glycerol-3-phosphate O-acyltransferase activity	molecular_function	0.18606	1	1	966	22	126097	Cluster-26447.138049
GO:0042302	structural constituent of cuticle	molecular_function	0.18665	1	2	966	88	126097	Cluster-26447.130566,Cluster-26447.137866
GO:0006733	oxidoreduction coenzyme metabolic process	biological_process	0.18669	1	15	966	1530	126097	Cluster-26447.109344,Cluster-26447.148200,Cluster-26447.155056,Cluster-26447.109452,Cluster-26447.155043,Cluster-26447.153858,Cluster-26447.724,Cluster-26447.84141,Cluster-26447.155053,Cluster-26447.108565,Cluster-26447.99447,Cluster-26447.56410,Cluster-26447.109407,Cluster-26447.155054,Cluster-26447.60729
GO:0046912	transferase activity, transferring acyl groups, acyl groups converted into alkyl on transfer	molecular_function	0.18775	1	2	966	121	126097	Cluster-26447.68560,Cluster-26447.147762
GO:0005230	extracellular ligand-gated ion channel activity	molecular_function	0.18862	1	3	966	161	126097	Cluster-26447.200669,Cluster-26447.102118,Cluster-26447.56531
GO:0016884	carbon-nitrogen ligase activity, with glutamine as amido-N-donor	molecular_function	0.18864	1	2	966	91	126097	Cluster-26447.200422,Cluster-26447.200419
GO:0004661	protein geranylgeranyltransferase activity	molecular_function	0.18913	1	1	966	25	126097	Cluster-26447.206350
GO:0004663	Rab geranylgeranyltransferase activity	molecular_function	0.18913	1	1	966	25	126097	Cluster-26447.206350
GO:0005968	Rab-protein geranylgeranyltransferase complex	cellular_component	0.18913	1	1	966	25	126097	Cluster-26447.206350
GO:0032774	RNA biosynthetic process	biological_process	0.19009	1	112	966	12770	126097	Cluster-26447.72759,Cluster-26447.186401,Cluster-26447.204734,Cluster-26447.111620,Cluster-26447.204981,Cluster-26447.185243,Cluster-26447.140660,Cluster-26447.119099,Cluster-26447.184313,Cluster-26447.9447,Cluster-26447.58799,Cluster-26447.122732,Cluster-26447.180526,Cluster-26447.40614,Cluster-26447.132072,Cluster-26447.159813,Cluster-26447.147331,Cluster-26447.190134,Cluster-26447.103862,Clust…
GO:0005788	endoplasmic reticulum lumen	cellular_component	0.19103	1	1	966	23	126097	Cluster-26447.33592
GO:0042132	fructose 1,6-bisphosphate 1-phosphatase activity	molecular_function	0.19166	1	2	966	132	126097	Cluster-26447.109344,Cluster-26447.109407
GO:0006383	transcription from RNA polymerase III promoter	biological_process	0.19262	1	4	966	329	126097	Cluster-26447.129960,Cluster-26447.135875,Cluster-26447.133824,Cluster-26447.133826
GO:0004334	fumarylacetoacetase activity	molecular_function	0.19267	1	1	966	29	126097	Cluster-26447.9012
GO:0016822	hydrolase activity, acting on acid carbon-carbon bonds	molecular_function	0.19267	1	1	966	29	126097	Cluster-26447.9012
GO:0016823	hydrolase activity, acting on acid carbon-carbon bonds, in ketonic substances	molecular_function	0.19267	1	1	966	29	126097	Cluster-26447.9012
GO:0005853	eukaryotic translation elongation factor 1 complex	cellular_component	0.19283	1	1	966	32	126097	Cluster-26447.118198
GO:0046429	4-hydroxy-3-methylbut-2-en-1-yl diphosphate synthase activity	molecular_function	0.19351	1	1	966	25	126097	Cluster-26447.107517
GO:0052592	oxidoreductase activity, acting on CH or CH2 groups, with an iron-sulfur protein as acceptor	molecular_function	0.19351	1	1	966	25	126097	Cluster-26447.107517
GO:0042558	pteridine-containing compound metabolic process	biological_process	0.1938	1	5	966	372	126097	Cluster-26447.58690,Cluster-26447.12358,Cluster-26447.84696,Cluster-26447.118364,Cluster-26447.113672
GO:0000302	response to reactive oxygen species	biological_process	0.19407	1	1	966	25	126097	Cluster-26447.142512
GO:1901031	regulation of response to reactive oxygen species	biological_process	0.19407	1	1	966	25	126097	Cluster-26447.142512
GO:1902882	regulation of response to oxidative stress	biological_process	0.19407	1	1	966	25	126097	Cluster-26447.142512
GO:0046999	regulation of conjugation	biological_process	0.19407	1	1	966	32	126097	Cluster-26447.111580
GO:0051766	inositol trisphosphate kinase activity	molecular_function	0.19522	1	2	966	106	126097	Cluster-26447.155828,Cluster-26447.115578
GO:0017172	cysteine dioxygenase activity	molecular_function	0.1961	1	1	966	26	126097	Cluster-26447.176793
GO:0046439	L-cysteine metabolic process	biological_process	0.1961	1	1	966	26	126097	Cluster-26447.176793
GO:0016070	RNA metabolic process	biological_process	0.19661	1	157	966	17982	126097	Cluster-26447.9447,Cluster-26447.122732,Cluster-9264.0,Cluster-26447.61385,Cluster-26447.13725,Cluster-26447.204182,Cluster-26447.164912,Cluster-26447.85436,Cluster-26447.9847,Cluster-26447.159813,Cluster-26447.94540,Cluster-26447.13031,Cluster-26447.186121,Cluster-26447.48334,Cluster-26447.68348,Cluster-26447.114984,Cluster-26447.111366,Cluster-26447.26693,Cluster-26447.106016,Cluster-26447.4605…
GO:0031929	TOR signaling	biological_process	0.19961	1	1	966	29	126097	Cluster-26447.211242
GO:0032006	regulation of TOR signaling	biological_process	0.19961	1	1	966	29	126097	Cluster-26447.211242
GO:0003333	amino acid transmembrane transport	biological_process	0.19992	1	4	966	295	126097	Cluster-26447.166736,Cluster-26447.149497,Cluster-26447.76180,Cluster-26447.119868
GO:0046658	anchored component of plasma membrane	cellular_component	0.20143	1	1	966	28	126097	Cluster-26447.118335
GO:0031704	apelin receptor binding	molecular_function	0.20194	1	1	966	41	126097	Cluster-26447.175970
GO:0009309	amine biosynthetic process	biological_process	0.20331	1	6	966	508	126097	Cluster-26447.98682,Cluster-26447.1470,Cluster-26447.108565,Cluster-26447.127427,Cluster-26447.8416,Cluster-26447.97817
GO:0042401	cellular biogenic amine biosynthetic process	biological_process	0.20331	1	6	966	508	126097	Cluster-26447.97817,Cluster-26447.8416,Cluster-26447.127427,Cluster-26447.108565,Cluster-26447.98682,Cluster-26447.1470
GO:0043603	cellular amide metabolic process	biological_process	0.20384	1	57	966	6631	126097	Cluster-26447.118735,Cluster-26447.155043,Cluster-26447.124497,Cluster-26447.127219,Cluster-26447.146217,Cluster-26447.140820,Cluster-26447.140660,Cluster-26447.63553,Cluster-26447.29217,Cluster-26447.122861,Cluster-26447.144646,Cluster-26447.83005,Cluster-26447.12358,Cluster-26447.155054,Cluster-26447.67052,Cluster-26447.102600,Cluster-26447.107355,Cluster-26447.209963,Cluster-26447.174995,Clust…
GO:0044272	sulfur compound biosynthetic process	biological_process	0.20442	1	5	966	402	126097	Cluster-26447.84141,Cluster-26447.46049,Cluster-26447.8416,Cluster-26447.46051,Cluster-26447.1470
GO:0034219	carbohydrate transmembrane transport	biological_process	0.20451	1	1	966	37	126097	Cluster-26447.58259
GO:0043170	macromolecule metabolic process	biological_process	0.20524	1	385	966	45636	126097	Cluster-26447.135627,Cluster-26447.181330,Cluster-26447.36444,Cluster-26447.87827,Cluster-26447.40614,Cluster-26447.48330,Cluster-26447.174995,Cluster-26447.117280,Cluster-26447.99294,Cluster-26447.99074,Cluster-26447.195148,Cluster-26447.13021,Cluster-26447.190134,Cluster-26447.117613,Cluster-26447.185243,Cluster-26447.204981,Cluster-26447.205794,Cluster-26447.111620,Cluster-26447.22371,Cluster-…
GO:0008238	exopeptidase activity	molecular_function	0.20526	1	9	966	776	126097	Cluster-26447.130194,Cluster-26447.26494,Cluster-26447.112036,Cluster-26447.10621,Cluster-26447.90351,Cluster-26447.40114,Cluster-26447.53809,Cluster-26447.124528,Cluster-26447.43676
GO:0030599	pectinesterase activity	molecular_function	0.20807	1	1	966	35	126097	Cluster-26447.173733
GO:0042545	cell wall modification	biological_process	0.20807	1	1	966	35	126097	Cluster-26447.173733
GO:0034061	DNA polymerase activity	molecular_function	0.20856	1	9	966	720	126097	Cluster-26447.203494,Cluster-26447.53906,Cluster-26447.111620,Cluster-26447.115132,Cluster-26447.22371,Cluster-26447.207851,Cluster-26447.3666,Cluster-26447.113291,Cluster-26447.111493
GO:0003840	gamma-glutamyltransferase activity	molecular_function	0.20877	1	1	966	26	126097	Cluster-26447.123640
GO:0006692	prostanoid metabolic process	biological_process	0.20877	1	1	966	26	126097	Cluster-26447.123640
GO:0006693	prostaglandin metabolic process	biological_process	0.20877	1	1	966	26	126097	Cluster-26447.123640
GO:0003899	DNA-directed RNA polymerase activity	molecular_function	0.21025	1	12	966	1106	126097	Cluster-26447.204617,Cluster-26447.9447,Cluster-26447.140660,Cluster-26447.205044,Cluster-26447.204304,Cluster-26447.181772,Cluster-26447.141736,Cluster-26447.57410,Cluster-26447.127758,Cluster-26447.135875,Cluster-26447.110145,Cluster-26447.113791
GO:0000288	nuclear-transcribed mRNA catabolic process, deadenylation-dependent decay	biological_process	0.21046	1	1	966	31	126097	Cluster-26447.26693
GO:0000290	deadenylation-dependent decapping of nuclear-transcribed mRNA	biological_process	0.21046	1	1	966	31	126097	Cluster-26447.26693
GO:0009307	DNA restriction-modification system	biological_process	0.21069	1	3	966	166	126097	Cluster-26447.107555,Cluster-26447.69821,Cluster-26447.212926
GO:0044355	clearance of foreign intracellular DNA	biological_process	0.21069	1	3	966	166	126097	Cluster-26447.107555,Cluster-26447.212926,Cluster-26447.69821
GO:0034654	nucleobase-containing compound biosynthetic process	biological_process	0.21127	1	121	966	13971	126097	Cluster-26447.135888,Cluster-26447.135875,Cluster-26447.38965,Cluster-26447.168299,Cluster-26447.48425,Cluster-26447.163880,Cluster-26447.127538,Cluster-26447.122713,Cluster-26447.81217,Cluster-26447.119323,Cluster-26447.172340,Cluster-26447.141736,Cluster-26447.120301,Cluster-26447.48424,Cluster-26447.100182,Cluster-26447.99827,Cluster-26447.22945,Cluster-26447.205876,Cluster-26447.10459,Cluster…
GO:0016053	organic acid biosynthetic process	biological_process	0.21166	1	26	966	2766	126097	Cluster-26447.187623,Cluster-26447.98682,Cluster-26447.127427,Cluster-26447.118735,Cluster-26447.97817,Cluster-26447.112768,Cluster-26447.185243,Cluster-26447.84696,Cluster-26447.12358,Cluster-26447.200419,Cluster-26447.48824,Cluster-26447.118364,Cluster-26447.85633,Cluster-26447.44385,Cluster-26447.207435,Cluster-26447.724,Cluster-26447.46049,Cluster-26447.46051,Cluster-26447.96215,Cluster-26447…
GO:0046394	carboxylic acid biosynthetic process	biological_process	0.21166	1	26	966	2766	126097	Cluster-26447.98682,Cluster-26447.187623,Cluster-26447.97817,Cluster-26447.118735,Cluster-26447.127427,Cluster-26447.112768,Cluster-26447.48824,Cluster-26447.200419,Cluster-26447.12358,Cluster-26447.185243,Cluster-26447.84696,Cluster-26447.85633,Cluster-26447.207435,Cluster-26447.118364,Cluster-26447.44385,Cluster-26447.46051,Cluster-26447.96215,Cluster-26447.46049,Cluster-26447.724,Cluster-26447…
GO:0006493	protein O-linked glycosylation	biological_process	0.2129	1	1	966	32	126097	Cluster-26447.13906
GO:1901617	organic hydroxy compound biosynthetic process	biological_process	0.21292	1	3	966	213	126097	Cluster-26447.98682,Cluster-26447.197288,Cluster-26447.70648
GO:0005516	calmodulin binding	molecular_function	0.21294	1	6	966	451	126097	Cluster-26447.72770,Cluster-26447.72775,Cluster-26447.9012,Cluster-26447.9136,Cluster-26447.11533,Cluster-26447.62824
GO:0052126	movement in host environment	biological_process	0.21297	1	4	966	281	126097	Cluster-26447.48975,Cluster-26447.48972,Cluster-26447.54173,Cluster-26447.48974
GO:0052192	movement in environment of other organism involved in symbiotic interaction	biological_process	0.21297	1	4	966	281	126097	Cluster-26447.48972,Cluster-26447.48975,Cluster-26447.48974,Cluster-26447.54173
GO:0009401	phosphoenolpyruvate-dependent sugar phosphotransferase system	biological_process	0.21322	1	3	966	201	126097	Cluster-26447.105025,Cluster-26447.26018,Cluster-26447.88210
GO:0001527	microfibril	cellular_component	0.21371	1	1	966	28	126097	Cluster-26447.91239
GO:0043205	fibril	cellular_component	0.21371	1	1	966	28	126097	Cluster-26447.91239
GO:0044420	extracellular matrix component	cellular_component	0.21371	1	1	966	28	126097	Cluster-26447.91239
GO:0008375	acetylglucosaminyltransferase activity	molecular_function	0.21439	1	5	966	380	126097	Cluster-26447.181533,Cluster-26447.107986,Cluster-26447.99255,Cluster-26447.59916,Cluster-26447.38377
GO:0043565	sequence-specific DNA binding	molecular_function	0.2149	1	23	966	2459	126097	Cluster-26447.46077,Cluster-26447.84191,Cluster-26447.147946,Cluster-26447.57410,Cluster-26447.53496,Cluster-26447.34247,Cluster-26447.117596,Cluster-26447.119099,Cluster-26447.45949,Cluster-26447.75347,Cluster-26447.205876,Cluster-26447.204182,Cluster-26447.81217,Cluster-26447.117280,Cluster-26447.181772,Cluster-26447.13725,Cluster-26447.204617,Cluster-26447.146706,Cluster-26447.190134,Cluster-2…
GO:0016593	Cdc73/Paf1 complex	cellular_component	0.21614	1	2	966	95	126097	Cluster-26447.48424,Cluster-26447.48425
GO:0046417	chorismate metabolic process	biological_process	0.21767	1	1	966	27	126097	Cluster-26447.59922
GO:0042438	melanin biosynthetic process	biological_process	0.21777	1	1	966	35	126097	Cluster-26447.70648
GO:0046189	phenol-containing compound biosynthetic process	biological_process	0.21777	1	1	966	35	126097	Cluster-26447.70648
GO:0005313	L-glutamate transmembrane transporter activity	molecular_function	0.2181	1	1	966	21	126097	Cluster-26447.158601
GO:0015172	acidic amino acid transmembrane transporter activity	molecular_function	0.2181	1	1	966	21	126097	Cluster-26447.158601
GO:0015501	glutamate:sodium symporter activity	molecular_function	0.2181	1	1	966	21	126097	Cluster-26447.158601
GO:0015800	acidic amino acid transport	biological_process	0.2181	1	1	966	21	126097	Cluster-26447.158601
GO:0015807	L-amino acid transport	biological_process	0.2181	1	1	966	21	126097	Cluster-26447.158601
GO:0015813	L-glutamate transport	biological_process	0.2181	1	1	966	21	126097	Cluster-26447.158601
GO:0055085	transmembrane transport	biological_process	0.22151	1	59	966	6350	126097	Cluster-26447.166736,Cluster-26447.137118,Cluster-30803.0,Cluster-26447.79310,Cluster-26447.106238,Cluster-26447.66043,Cluster-26447.164912,Cluster-26447.48330,Cluster-26447.27365,Cluster-1205.0,Cluster-26447.66517,Cluster-26447.67905,Cluster-26447.158404,Cluster-26447.87175,Cluster-26447.69821,Cluster-26447.83904,Cluster-26447.11686,Cluster-26447.105908,Cluster-26447.107535,Cluster-26447.59987,C…
GO:0010207	photosystem II assembly	biological_process	0.22153	1	1	966	41	126097	Cluster-26447.13697
GO:0098660	inorganic ion transmembrane transport	biological_process	0.22158	1	17	966	1660	126097	Cluster-26447.77712,Cluster-26447.120543,Cluster-26447.10934,Cluster-26447.10933,Cluster-26447.2402,Cluster-26447.22371,Cluster-26447.163186,Cluster-26447.48334,Cluster-26447.140126,Cluster-26447.207713,Cluster-26447.114984,Cluster-26447.125377,Cluster-26447.66517,Cluster-26447.66043,Cluster-26447.48330,Cluster-26447.164912,Cluster-26447.11686
GO:0098662	inorganic cation transmembrane transport	biological_process	0.22158	1	17	966	1660	126097	Cluster-26447.11686,Cluster-26447.66517,Cluster-26447.66043,Cluster-26447.164912,Cluster-26447.48330,Cluster-26447.125377,Cluster-26447.140126,Cluster-26447.207713,Cluster-26447.114984,Cluster-26447.2402,Cluster-26447.22371,Cluster-26447.48334,Cluster-26447.163186,Cluster-26447.10934,Cluster-26447.10933,Cluster-26447.77712,Cluster-26447.120543
GO:0000904	cell morphogenesis involved in differentiation	biological_process	0.22165	1	2	966	113	126097	Cluster-26447.208563,Cluster-26447.216685
GO:0044743	intracellular protein transmembrane import	biological_process	0.22201	1	3	966	217	126097	Cluster-26447.43983,Cluster-26447.107535,Cluster-20433.0
GO:0065002	intracellular protein transmembrane transport	biological_process	0.22201	1	3	966	217	126097	Cluster-26447.43983,Cluster-26447.107535,Cluster-20433.0
GO:0015179	L-amino acid transmembrane transporter activity	molecular_function	0.22282	1	1	966	22	126097	Cluster-26447.158601
GO:0001772	immunological synapse	cellular_component	0.22315	1	1	966	28	126097	Cluster-26447.107818
GO:0097197	tetraspanin-enriched microdomain	cellular_component	0.22315	1	1	966	28	126097	Cluster-26447.107818
GO:0019362	pyridine nucleotide metabolic process	biological_process	0.22354	1	12	966	1230	126097	Cluster-26447.155056,Cluster-26447.109452,Cluster-26447.148200,Cluster-26447.109344,Cluster-26447.724,Cluster-26447.155043,Cluster-26447.153858,Cluster-26447.155053,Cluster-26447.108565,Cluster-26447.155054,Cluster-26447.109407,Cluster-26447.60729
GO:0031300	intrinsic component of organelle membrane	cellular_component	0.22429	1	7	966	627	126097	Cluster-26447.43676,Cluster-26447.121926,Cluster-26447.209390,Cluster-26447.17376,Cluster-26447.84191,Cluster-26447.13906,Cluster-26447.48978
GO:0031301	integral component of organelle membrane	cellular_component	0.22429	1	7	966	627	126097	Cluster-26447.209390,Cluster-26447.17376,Cluster-26447.121926,Cluster-26447.43676,Cluster-26447.48978,Cluster-26447.13906,Cluster-26447.84191
GO:0008610	lipid biosynthetic process	biological_process	0.22531	1	27	966	2856	126097	Cluster-8641.3,Cluster-26447.123064,Cluster-26447.53809,Cluster-26447.90686,Cluster-26447.197774,Cluster-26447.98682,Cluster-26447.21121,Cluster-26447.39092,Cluster-26447.121272,Cluster-26447.12358,Cluster-26447.57657,Cluster-26447.57664,Cluster-26447.204994,Cluster-26447.99255,Cluster-26447.165876,Cluster-26447.103544,Cluster-26447.28828,Cluster-26447.67834,Cluster-26447.112768,Cluster-26447.724…
GO:0006118	obsolete electron transport	biological_process	0.22571	1	17	966	1790	126097	Cluster-26447.184919,Cluster-26447.180581,Cluster-26447.142960,Cluster-26447.77681,Cluster-26447.113291,Cluster-26447.64869,Cluster-26447.197923,Cluster-26447.35718,Cluster-26447.56410,Cluster-26447.99447,Cluster-26447.107355,Cluster-26447.111620,Cluster-26447.135732,Cluster-26447.134629,Cluster-26447.33592,Cluster-26447.169514,Cluster-26447.190892
GO:0016160	amylase activity	molecular_function	0.22659	1	2	966	111	126097	Cluster-26447.135625,Cluster-26447.135627
GO:0006637	acyl-CoA metabolic process	biological_process	0.22697	1	2	966	106	126097	Cluster-26447.206523,Cluster-26447.135732
GO:0035383	thioester metabolic process	biological_process	0.22697	1	2	966	106	126097	Cluster-26447.135732,Cluster-26447.206523
GO:0022618	ribonucleoprotein complex assembly	biological_process	0.2289	1	2	966	117	126097	Cluster-26447.156490,Cluster-26447.156505
GO:1990234	transferase complex	cellular_component	0.22997	1	43	966	4486	126097	Cluster-26447.58799,Cluster-26447.24030,Cluster-26447.111493,Cluster-26447.107804,Cluster-26447.207851,Cluster-26447.115132,Cluster-26447.22371,Cluster-26447.111620,Cluster-26447.165876,Cluster-26447.203505,Cluster-26447.22355,Cluster-26447.99213,Cluster-26447.79310,Cluster-26447.117280,Cluster-26447.216958,Cluster-26447.181675,Cluster-26447.146706,Cluster-26447.107986,Cluster-26447.137118,Cluste…
GO:0015128	gluconate transmembrane transporter activity	molecular_function	0.23047	1	1	966	27	126097	Cluster-26447.58259
GO:0015725	gluconate transport	biological_process	0.23047	1	1	966	27	126097	Cluster-26447.58259
GO:0042873	aldonate transport	biological_process	0.23047	1	1	966	27	126097	Cluster-26447.58259
GO:0042879	aldonate transmembrane transporter activity	molecular_function	0.23047	1	1	966	27	126097	Cluster-26447.58259
GO:0070008	serine-type exopeptidase activity	molecular_function	0.2323	1	6	966	491	126097	Cluster-26447.26494,Cluster-26447.40114,Cluster-26447.53809,Cluster-26447.112036,Cluster-26447.10621,Cluster-26447.43676
GO:0005730	nucleolus	cellular_component	0.23334	1	13	966	1237	126097	Cluster-26447.135875,Cluster-26447.127758,Cluster-26447.110145,Cluster-26447.113791,Cluster-26447.53906,Cluster-26447.204617,Cluster-26447.9447,Cluster-26447.205044,Cluster-26447.140660,Cluster-26447.204304,Cluster-26447.181772,Cluster-26447.57410,Cluster-26447.141736
GO:0005784	Sec61 translocon complex	cellular_component	0.23342	1	1	966	33	126097	Cluster-26447.121926
GO:0071256	translocon complex	cellular_component	0.23342	1	1	966	33	126097	Cluster-26447.121926
GO:0003995	acyl-CoA dehydrogenase activity	molecular_function	0.23427	1	2	966	131	126097	Cluster-26447.135732,Cluster-26447.64869
GO:0010243	response to organonitrogen compound	biological_process	0.23444	1	1	966	31	126097	Cluster-26447.56531
GO:0004655	porphobilinogen synthase activity	molecular_function	0.23504	1	1	966	38	126097	Cluster-26447.102068
GO:0030269	tetrahydromethanopterin S-methyltransferase activity	molecular_function	0.23517	1	2	966	93	126097	Cluster-26447.113672,Cluster-26447.58690
GO:0042086	5-methyl-5,6,7,8-tetrahydromethanopterin-dependent methyltransferase activity	molecular_function	0.23517	1	2	966	93	126097	Cluster-26447.113672,Cluster-26447.58690
GO:0004852	uroporphyrinogen-III synthase activity	molecular_function	0.23744	1	1	966	26	126097	Cluster-26447.83904
GO:0071855	neuropeptide receptor binding	molecular_function	0.23888	1	1	966	46	126097	Cluster-26447.175970
GO:0030150	protein import into mitochondrial matrix	biological_process	0.23906	1	2	966	117	126097	Cluster-20433.0,Cluster-26447.107535
GO:0042816	vitamin B6 metabolic process	biological_process	0.24033	1	2	966	126	126097	Cluster-26447.197288,Cluster-26447.98682
GO:0042819	vitamin B6 biosynthetic process	biological_process	0.24033	1	2	966	126	126097	Cluster-26447.98682,Cluster-26447.197288
GO:0000785	chromatin	cellular_component	0.24056	1	6	966	550	126097	Cluster-26447.129960,Cluster-26447.123519,Cluster-26447.113291,Cluster-26447.111620,Cluster-26447.133826,Cluster-26447.133824
GO:0008837	diaminopimelate epimerase activity	molecular_function	0.243	1	1	966	32	126097	Cluster-26447.187623
GO:0004872	receptor activity	molecular_function	0.24474	1	14	966	1300	126097	Cluster-26447.156505,Cluster-26447.102118,Cluster-26447.79310,Cluster-26447.56531,Cluster-26447.44385,Cluster-458.0,Cluster-26447.137118,Cluster-26447.52943,Cluster-26447.200669,Cluster-26447.33127,Cluster-26447.156490,Cluster-26447.156997,Cluster-26447.153504,Cluster-26447.2402
GO:0004864	protein phosphatase inhibitor activity	molecular_function	0.24491	1	1	966	33	126097	Cluster-26447.53906
GO:0019212	phosphatase inhibitor activity	molecular_function	0.24491	1	1	966	33	126097	Cluster-26447.53906
GO:0051705	multi-organism behavior	biological_process	0.24527	1	2	966	109	126097	Cluster-26447.46051,Cluster-26447.46049
GO:0046131	pyrimidine ribonucleoside metabolic process	biological_process	0.24541	1	1	966	51	126097	Cluster-26447.162631
GO:0006626	protein targeting to mitochondrion	biological_process	0.24543	1	3	966	208	126097	Cluster-26447.43983,Cluster-26447.107535,Cluster-20433.0
GO:1901700	response to oxygen-containing compound	biological_process	0.246	1	2	966	128	126097	Cluster-26447.56531,Cluster-26447.142512
GO:0006261	DNA-dependent DNA replication	biological_process	0.24723	1	9	966	812	126097	Cluster-26447.204617,Cluster-26447.12834,Cluster-26447.155419,Cluster-26447.46077,Cluster-26447.57410,Cluster-26447.127712,Cluster-26447.40614,Cluster-26447.53906,Cluster-26447.107160
GO:0030863	cortical cytoskeleton	cellular_component	0.25043	1	1	966	39	126097	Cluster-26447.9136
GO:0030864	cortical actin cytoskeleton	cellular_component	0.25043	1	1	966	39	126097	Cluster-26447.9136
GO:0030248	cellulose binding	molecular_function	0.25057	1	1	966	39	126097	Cluster-26447.6629
GO:0045088	regulation of innate immune response	biological_process	0.25068	1	1	966	47	126097	Cluster-26447.212720
GO:0003714	transcription corepressor activity	molecular_function	0.25102	1	1	966	40	126097	Cluster-26447.52385
GO:0019752	carboxylic acid metabolic process	biological_process	0.25413	1	68	966	7540	126097	Cluster-26447.207435,Cluster-26447.85633,Cluster-26447.87637,Cluster-26447.46049,Cluster-26447.113672,Cluster-26447.113791,Cluster-26447.1432,Cluster-26447.181705,Cluster-26447.63553,Cluster-26447.146217,Cluster-26447.155043,Cluster-26447.123064,Cluster-26447.209963,Cluster-26447.42067,Cluster-26447.135732,Cluster-26447.88622,Cluster-26447.155056,Cluster-26447.724,Cluster-26447.206523,Cluster-264…
GO:0008608	attachment of spindle microtubules to kinetochore	biological_process	0.25453	1	3	966	198	126097	Cluster-26447.184773,Cluster-26447.135888,Cluster-26447.184774
GO:0030030	cell projection organization	biological_process	0.25637	1	4	966	288	126097	Cluster-26447.208563,Cluster-26447.216685,Cluster-26447.9136,Cluster-26447.166844
GO:0016615	malate dehydrogenase activity	molecular_function	0.25669	1	3	966	157	126097	Cluster-26447.91395,Cluster-26447.117840,Cluster-26447.42067
GO:0004003	ATP-dependent DNA helicase activity	molecular_function	0.25671	1	3	966	174	126097	Cluster-26447.58449,Cluster-26447.28276,Cluster-26447.120306
GO:0000042	protein targeting to Golgi	biological_process	0.25792	1	1	966	37	126097	Cluster-26447.9095
GO:0000301	retrograde transport, vesicle recycling within Golgi	biological_process	0.25792	1	1	966	37	126097	Cluster-26447.9095
GO:0034067	protein localization to Golgi apparatus	biological_process	0.25792	1	1	966	37	126097	Cluster-26447.9095
GO:0072600	establishment of protein localization to Golgi	biological_process	0.25792	1	1	966	37	126097	Cluster-26447.9095
GO:0033743	peptide-methionine (R)-S-oxide reductase activity	molecular_function	0.25887	1	1	966	43	126097	Cluster-26447.159084
GO:0006355	regulation of transcription, DNA-templated	biological_process	0.25982	1	90	966	10437	126097	Cluster-26447.27742,Cluster-26447.87881,Cluster-26447.94856,Cluster-26447.84191,Cluster-26447.147946,Cluster-26447.60056,Cluster-26447.52943,Cluster-26447.133824,Cluster-26447.10459,Cluster-26447.75347,Cluster-26447.125048,Cluster-26447.205876,Cluster-26447.99827,Cluster-26447.22945,Cluster-26447.81217,Cluster-26447.120301,Cluster-26447.122713,Cluster-26447.127538,Cluster-26447.163880,Cluster-264…
GO:1903506	regulation of nucleic acid-templated transcription	biological_process	0.25982	1	90	966	10437	126097	Cluster-26447.204182,Cluster-26447.195148,Cluster-26447.117280,Cluster-26447.13725,Cluster-26447.147331,Cluster-26447.190134,Cluster-26447.103862,Cluster-26447.159813,Cluster-26447.40614,Cluster-26447.132072,Cluster-26447.122732,Cluster-26447.180526,Cluster-26447.119099,Cluster-26447.184313,Cluster-26447.204981,Cluster-26447.185243,Cluster-26447.72759,Cluster-26447.111620,Cluster-26447.57455,Clus…
GO:0008028	monocarboxylic acid transmembrane transporter activity	molecular_function	0.26002	1	1	966	34	126097	Cluster-26447.58259
GO:0008047	enzyme activator activity	molecular_function	0.26058	1	6	966	494	126097	Cluster-26447.26693,Cluster-26447.160775,Cluster-26447.32109,Cluster-26447.65262,Cluster-26447.68826,Cluster-26447.120607
GO:0070585	protein localization to mitochondrion	biological_process	0.26099	1	3	966	215	126097	Cluster-26447.107535,Cluster-20433.0,Cluster-26447.43983
GO:0072655	establishment of protein localization to mitochondrion	biological_process	0.26099	1	3	966	215	126097	Cluster-26447.43983,Cluster-20433.0,Cluster-26447.107535
GO:0042435	indole-containing compound biosynthetic process	biological_process	0.26122	1	6	966	546	126097	Cluster-26447.8416,Cluster-26447.108565,Cluster-26447.169437,Cluster-26447.103544,Cluster-26447.1470,Cluster-26447.98682
GO:0015399	primary active transmembrane transporter activity	molecular_function	0.26195	1	10	966	851	126097	Cluster-26447.120543,Cluster-26447.86969,Cluster-26447.67181,Cluster-26447.137118,Cluster-26447.86962,Cluster-26447.60113,Cluster-26447.79310,Cluster-26447.84250,Cluster-26447.150239,Cluster-26447.129949
GO:0015405	P-P-bond-hydrolysis-driven transmembrane transporter activity	molecular_function	0.26195	1	10	966	851	126097	Cluster-26447.129949,Cluster-26447.150239,Cluster-26447.84250,Cluster-26447.60113,Cluster-26447.86962,Cluster-26447.79310,Cluster-26447.137118,Cluster-26447.120543,Cluster-26447.67181,Cluster-26447.86969
GO:0000139	Golgi membrane	cellular_component	0.26274	1	5	966	391	126097	Cluster-26447.43676,Cluster-26447.152478,Cluster-26447.84191,Cluster-26447.48978,Cluster-26447.13906
GO:0042822	pyridoxal phosphate metabolic process	biological_process	0.26388	1	1	966	41	126097	Cluster-26447.98682
GO:0042823	pyridoxal phosphate biosynthetic process	biological_process	0.26388	1	1	966	41	126097	Cluster-26447.98682
GO:0046184	aldehyde biosynthetic process	biological_process	0.26388	1	1	966	41	126097	Cluster-26447.98682
GO:0050852	T cell receptor signaling pathway	biological_process	0.26407	1	1	966	37	126097	Cluster-26447.164902
GO:0022804	active transmembrane transporter activity	molecular_function	0.26535	1	18	966	1728	126097	Cluster-26447.105501,Cluster-26447.158601,Cluster-26447.67181,Cluster-26447.26018,Cluster-26447.120543,Cluster-26447.86969,Cluster-26447.130453,Cluster-26447.86962,Cluster-26447.182885,Cluster-26447.84250,Cluster-16727.6,Cluster-26447.137118,Cluster-26447.74407,Cluster-26447.60113,Cluster-26447.79310,Cluster-26447.152478,Cluster-26447.150239,Cluster-26447.129949
GO:1901698	response to nitrogen compound	biological_process	0.26647	1	1	966	36	126097	Cluster-26447.56531
GO:0006825	copper ion transport	biological_process	0.26684	1	2	966	107	126097	Cluster-26447.48330,Cluster-26447.48334
GO:0006582	melanin metabolic process	biological_process	0.26789	1	1	966	46	126097	Cluster-26447.70648
GO:0030178	negative regulation of Wnt signaling pathway	biological_process	0.26808	1	1	966	35	126097	Cluster-27210.2
GO:0004100	chitin synthase activity	molecular_function	0.26821	1	1	966	33	126097	Cluster-26447.59916
GO:0006031	chitin biosynthetic process	biological_process	0.26821	1	1	966	33	126097	Cluster-26447.59916
GO:0046349	amino sugar biosynthetic process	biological_process	0.26821	1	1	966	33	126097	Cluster-26447.59916
GO:1901073	glucosamine-containing compound biosynthetic process	biological_process	0.26821	1	1	966	33	126097	Cluster-26447.59916
GO:0033643	host cell part	cellular_component	0.26828	1	11	966	1087	126097	Cluster-26447.48974,Cluster-26447.73778,Cluster-26447.169437,Cluster-26447.101528,Cluster-26447.48972,Cluster-26447.48975,Cluster-26447.164857,Cluster-26447.146706,Cluster-26447.61385,Cluster-26447.142660,Cluster-26447.181772
GO:0007599	hemostasis	biological_process	0.2713	1	5	966	418	126097	Cluster-26447.191579,Cluster-26447.46051,Cluster-26447.181330,Cluster-26447.20884,Cluster-26447.46049
GO:0050817	coagulation	biological_process	0.2713	1	5	966	418	126097	Cluster-26447.191579,Cluster-26447.46049,Cluster-26447.46051,Cluster-26447.20884,Cluster-26447.181330
GO:0050878	regulation of body fluid levels	biological_process	0.2713	1	5	966	418	126097	Cluster-26447.191579,Cluster-26447.46049,Cluster-26447.46051,Cluster-26447.20884,Cluster-26447.181330
GO:0006732	coenzyme metabolic process	biological_process	0.2717	1	26	966	2886	126097	Cluster-26447.125593,Cluster-26447.96215,Cluster-26447.153858,Cluster-26447.84141,Cluster-26447.724,Cluster-26447.148200,Cluster-26447.118364,Cluster-26447.155056,Cluster-26447.109452,Cluster-26447.58690,Cluster-26447.206523,Cluster-26447.155053,Cluster-26447.108565,Cluster-26447.113672,Cluster-26447.155043,Cluster-26447.118735,Cluster-26447.109344,Cluster-26447.98682,Cluster-26447.135732,Cluster…
GO:0010024	phytochromobilin biosynthetic process	biological_process	0.27324	1	1	966	37	126097	Cluster-26447.88210
GO:0016636	oxidoreductase activity, acting on the CH-CH group of donors, iron-sulfur protein as acceptor	molecular_function	0.27324	1	1	966	37	126097	Cluster-26447.88210
GO:0051202	phytochromobilin metabolic process	biological_process	0.27324	1	1	966	37	126097	Cluster-26447.88210
GO:0051169	nuclear transport	biological_process	0.27363	1	6	966	506	126097	Cluster-26447.48972,Cluster-26447.48975,Cluster-26447.55764,Cluster-26447.48974,Cluster-26447.73778,Cluster-26447.26715
GO:0051186	cofactor metabolic process	biological_process	0.27382	1	32	966	3599	126097	Cluster-26447.58690,Cluster-26447.108565,Cluster-26447.155053,Cluster-26447.206523,Cluster-26447.724,Cluster-26447.96215,Cluster-26447.91562,Cluster-26447.155056,Cluster-26447.118364,Cluster-26447.148200,Cluster-26447.60729,Cluster-26447.84696,Cluster-26447.112768,Cluster-26447.91564,Cluster-26447.88210,Cluster-26447.98682,Cluster-26447.83904,Cluster-26447.113672,Cluster-26447.84141,Cluster-26447…
GO:2001141	regulation of RNA biosynthetic process	biological_process	0.27429	1	90	966	10468	126097	Cluster-26447.159813,Cluster-26447.40614,Cluster-26447.132072,Cluster-26447.204182,Cluster-26447.195148,Cluster-26447.117280,Cluster-26447.13725,Cluster-26447.147331,Cluster-26447.190134,Cluster-26447.103862,Cluster-26447.204981,Cluster-26447.185243,Cluster-26447.72759,Cluster-26447.111620,Cluster-26447.122732,Cluster-26447.180526,Cluster-26447.119099,Cluster-26447.184313,Cluster-26447.160578,Clu…
GO:1901661	quinone metabolic process	biological_process	0.27459	1	4	966	349	126097	Cluster-26447.99447,Cluster-26447.56410,Cluster-26447.84141,Cluster-26447.96215
GO:1901663	quinone biosynthetic process	biological_process	0.27459	1	4	966	349	126097	Cluster-26447.96215,Cluster-26447.84141,Cluster-26447.56410,Cluster-26447.99447
GO:0016298	lipase activity	molecular_function	0.27465	1	3	966	176	126097	Cluster-26447.41274,Cluster-26447.83904,Cluster-26447.86326
GO:0003725	double-stranded RNA binding	molecular_function	0.2754	1	1	966	51	126097	Cluster-26447.88401
GO:0010333	terpene synthase activity	molecular_function	0.27651	1	2	966	107	126097	Cluster-26447.206703,Cluster-26447.206705
GO:0018995	host	cellular_component	0.27829	1	11	966	1097	126097	Cluster-26447.48975,Cluster-26447.101528,Cluster-26447.48972,Cluster-26447.169437,Cluster-26447.48974,Cluster-26447.73778,Cluster-26447.164857,Cluster-26447.61385,Cluster-26447.146706,Cluster-26447.181772,Cluster-26447.142660
GO:0043657	host cell	cellular_component	0.27829	1	11	966	1097	126097	Cluster-26447.181772,Cluster-26447.142660,Cluster-26447.61385,Cluster-26447.146706,Cluster-26447.164857,Cluster-26447.48975,Cluster-26447.48972,Cluster-26447.101528,Cluster-26447.169437,Cluster-26447.48974,Cluster-26447.73778
GO:0047661	amino-acid racemase activity	molecular_function	0.2798	1	1	966	39	126097	Cluster-26447.187623
GO:0031984	organelle subcompartment	cellular_component	0.28076	1	2	966	117	126097	Cluster-26447.107986,Cluster-26447.13906
GO:0098791	Golgi subcompartment	cellular_component	0.28076	1	2	966	117	126097	Cluster-26447.107986,Cluster-26447.13906
GO:0000154	rRNA modification	biological_process	0.28098	1	3	966	208	126097	Cluster-26447.48330,Cluster-26447.48334,Cluster-26447.125593
GO:0000976	transcription regulatory region sequence-specific DNA binding	molecular_function	0.28253	1	1	966	38	126097	Cluster-26447.81217
GO:0006091	generation of precursor metabolites and energy	biological_process	0.28269	1	27	966	2980	126097	Cluster-26447.120331,Cluster-26447.99447,Cluster-26447.109407,Cluster-26447.155054,Cluster-26447.13697,Cluster-26447.91523,Cluster-26447.117840,Cluster-26447.91395,Cluster-26447.42067,Cluster-26447.120543,Cluster-26447.109344,Cluster-4272.5,Cluster-26447.147762,Cluster-26447.158588,Cluster-26447.155043,Cluster-26447.96780,Cluster-26447.37937,Cluster-26447.206523,Cluster-26447.155053,Cluster-26447…
GO:0015996	chlorophyll catabolic process	biological_process	0.28333	1	2	966	139	126097	Cluster-26447.91562,Cluster-26447.91564
GO:0047746	chlorophyllase activity	molecular_function	0.28333	1	2	966	139	126097	Cluster-26447.91562,Cluster-26447.91564
GO:0005577	fibrinogen complex	cellular_component	0.2837	1	4	966	316	126097	Cluster-26447.46049,Cluster-26447.181330,Cluster-26447.20884,Cluster-26447.46051
GO:0030168	platelet activation	biological_process	0.2837	1	4	966	316	126097	Cluster-26447.46049,Cluster-26447.20884,Cluster-26447.181330,Cluster-26447.46051
GO:1901605	alpha-amino acid metabolic process	biological_process	0.28447	1	41	966	4453	126097	Cluster-26447.185243,Cluster-26447.88622,Cluster-26447.12358,Cluster-26447.48824,Cluster-26447.187623,Cluster-26447.146217,Cluster-26447.140660,Cluster-26447.1432,Cluster-26447.164902,Cluster-26447.181705,Cluster-26447.97680,Cluster-26447.11275,Cluster-26447.200422,Cluster-26447.113672,Cluster-26447.113791,Cluster-26447.9847,Cluster-26447.44385,Cluster-26447.207435,Cluster-26447.46049,Cluster-264…
GO:0016272	prefoldin complex	cellular_component	0.28456	1	2	966	140	126097	Cluster-26447.181330,Cluster-26447.165798
GO:0043604	amide biosynthetic process	biological_process	0.28491	1	50	966	6010	126097	Cluster-26447.84696,Cluster-26447.117840,Cluster-26447.200419,Cluster-26447.181649,Cluster-26447.103544,Cluster-26447.62499,Cluster-26447.105731,Cluster-26447.45138,Cluster-26447.91564,Cluster-26447.86326,Cluster-26447.58690,Cluster-26447.46116,Cluster-26447.75195,Cluster-26447.172844,Cluster-26447.207639,Cluster-26447.724,Cluster-26447.160118,Cluster-26447.113937,Cluster-26447.91562,Cluster-2644…
GO:0051051	negative regulation of transport	biological_process	0.28539	1	1	966	38	126097	Cluster-26447.75058
GO:0010277	chlorophyllide a oxygenase [overall] activity	molecular_function	0.2863	1	1	966	39	126097	Cluster-26447.6629
GO:0006304	DNA modification	biological_process	0.28631	1	5	966	379	126097	Cluster-26447.69821,Cluster-26447.212926,Cluster-26447.95481,Cluster-26447.107555,Cluster-26447.4592
GO:0030975	thiamine binding	molecular_function	0.28659	1	1	966	40	126097	Cluster-26447.84141
GO:0008283	cell proliferation	biological_process	0.28683	1	4	966	330	126097	Cluster-31356.0,Cluster-26447.163186,Cluster-26447.22371,Cluster-26447.179322
GO:0098813	nuclear chromosome segregation	biological_process	0.28739	1	6	966	508	126097	Cluster-26447.53906,Cluster-26447.184774,Cluster-26447.114984,Cluster-26447.99213,Cluster-26447.135888,Cluster-26447.184773
GO:1901360	organic cyclic compound metabolic process	biological_process	0.28772	1	266	966	31662	126097	Cluster-26447.186121,Cluster-26447.33049,Cluster-26447.71594,Cluster-26447.48334,Cluster-26447.105,Cluster-26447.65687,Cluster-26447.114984,Cluster-26447.22171,Cluster-26447.13031,Cluster-26447.115609,Cluster-26447.124429,Cluster-26447.133826,Cluster-26447.109788,Cluster-26447.142960,Cluster-26447.176499,Cluster-26447.203494,Cluster-26447.56531,Cluster-26447.118364,Cluster-26447.173983,Cluster-26…
GO:0004799	thymidylate synthase activity	molecular_function	0.29069	1	1	966	36	126097	Cluster-26447.100182
GO:0009059	macromolecule biosynthetic process	biological_process	0.29296	1	184	966	22019	126097	Cluster-26447.120306,Cluster-26447.87881,Cluster-26447.46077,Cluster-26447.91564,Cluster-26447.181649,Cluster-26447.205876,Cluster-26447.99255,Cluster-26447.62499,Cluster-26447.48424,Cluster-26447.125048,Cluster-26447.75347,Cluster-26447.160118,Cluster-26447.127538,Cluster-26447.159650,Cluster-26447.120301,Cluster-26447.119323,Cluster-26447.172340,Cluster-26447.207639,Cluster-26447.122456,Cluster…
GO:0031555	transcriptional attenuation	biological_process	0.29374	1	1	966	38	126097	Cluster-26447.185243
GO:0031556	transcriptional attenuation by ribosome	biological_process	0.29374	1	1	966	38	126097	Cluster-26447.185243
GO:0006508	proteolysis	biological_process	0.29593	1	48	966	5207	126097	Cluster-26447.197252,Cluster-26447.163880,Cluster-26447.147570,Cluster-26447.84716,Cluster-26447.114635,Cluster-26447.38965,Cluster-26447.26765,Cluster-26447.119323,Cluster-26447.40114,Cluster-26447.65428,Cluster-26447.91562,Cluster-26447.12834,Cluster-26447.43676,Cluster-26447.119474,Cluster-26447.114984,Cluster-26447.26494,Cluster-26447.112036,Cluster-26447.90351,Cluster-969.1,Cluster-26447.915…
GO:0004594	pantothenate kinase activity	molecular_function	0.29765	1	1	966	36	126097	Cluster-26447.118735
GO:0044085	cellular component biogenesis	biological_process	0.29877	1	62	966	7566	126097	Cluster-26447.156505,Cluster-26447.125593,Cluster-26447.99294,Cluster-26447.99213,Cluster-26447.174995,Cluster-26447.46049,Cluster-26447.179322,Cluster-26447.179565,Cluster-26447.129937,Cluster-26447.181330,Cluster-26447.20884,Cluster-26447.42104,Cluster-26447.113331,Cluster-26447.156490,Cluster-26447.117627,Cluster-26447.53906,Cluster-26447.45139,Cluster-26447.73778,Cluster-26447.48330,Cluster-2…
GO:0001934	positive regulation of protein phosphorylation	biological_process	0.29877	1	1	966	43	126097	Cluster-26447.163186
GO:0042327	positive regulation of phosphorylation	biological_process	0.29877	1	1	966	43	126097	Cluster-26447.163186
GO:0006084	acetyl-CoA metabolic process	biological_process	0.29924	1	1	966	55	126097	Cluster-26447.206523
GO:0090305	nucleic acid phosphodiester bond hydrolysis	biological_process	0.29979	1	1	966	39	126097	Cluster-26447.69821
GO:0072594	establishment of protein localization to organelle	biological_process	0.30259	1	11	966	1100	126097	Cluster-26447.125274,Cluster-26447.55764,Cluster-20433.0,Cluster-26447.107535,Cluster-26447.43983,Cluster-26447.184313,Cluster-26447.9095,Cluster-26447.120306,Cluster-26447.65687,Cluster-26447.26715,Cluster-26447.73778
GO:0019219	regulation of nucleobase-containing compound metabolic process	biological_process	0.30266	1	95	966	11112	126097	Cluster-26447.106016,Cluster-26447.57455,Cluster-26447.46051,Cluster-26447.111366,Cluster-26447.87879,Cluster-26447.113291,Cluster-26447.160578,Cluster-26447.94858,Cluster-26447.142960,Cluster-26447.155828,Cluster-26447.119064,Cluster-26447.133826,Cluster-26447.124429,Cluster-26447.190563,Cluster-26447.13031,Cluster-748.0,Cluster-26447.123519,Cluster-26447.164716,Cluster-26447.114984,Cluster-2644…
GO:0043167	ion binding	molecular_function	0.30374	1	307	966	35730	126097	Cluster-26447.150239,Cluster-26447.122456,Cluster-26447.65064,Cluster-26447.127585,Cluster-31356.0,Cluster-26447.119537,Cluster-26447.120607,Cluster-26447.75347,Cluster-26447.72770,Cluster-26447.62499,Cluster-26447.148206,Cluster-26447.145625,Cluster-26447.46077,Cluster-26447.130453,Cluster-26447.170430,Cluster-26447.183831,Cluster-1093.5,Cluster-26447.58613,Cluster-26447.129960,Cluster-26447.539…
GO:0000123	histone acetyltransferase complex	cellular_component	0.30376	1	3	966	232	126097	Cluster-748.0,Cluster-26447.117280,Cluster-26447.107986
GO:0031248	protein acetyltransferase complex	cellular_component	0.30376	1	3	966	232	126097	Cluster-26447.117280,Cluster-748.0,Cluster-26447.107986
GO:1902493	acetyltransferase complex	cellular_component	0.30376	1	3	966	232	126097	Cluster-26447.117280,Cluster-748.0,Cluster-26447.107986
GO:0033646	host intracellular part	cellular_component	0.30439	1	9	966	915	126097	Cluster-26447.146706,Cluster-26447.142660,Cluster-26447.181772,Cluster-26447.48974,Cluster-26447.73778,Cluster-26447.169437,Cluster-26447.48972,Cluster-26447.48975,Cluster-26447.164857
GO:0043656	intracellular region of host	cellular_component	0.30439	1	9	966	915	126097	Cluster-26447.181772,Cluster-26447.142660,Cluster-26447.146706,Cluster-26447.164857,Cluster-26447.48975,Cluster-26447.48972,Cluster-26447.169437,Cluster-26447.73778,Cluster-26447.48974
GO:0000030	mannosyltransferase activity	molecular_function	0.30536	1	1	966	46	126097	Cluster-26447.13906
GO:0000136	alpha-1,6-mannosyltransferase complex	cellular_component	0.30536	1	1	966	46	126097	Cluster-26447.13906
GO:0000137	Golgi cis cisterna	cellular_component	0.30536	1	1	966	46	126097	Cluster-26447.13906
GO:0031501	mannosyltransferase complex	cellular_component	0.30536	1	1	966	46	126097	Cluster-26447.13906
GO:0031985	Golgi cisterna	cellular_component	0.30536	1	1	966	46	126097	Cluster-26447.13906
GO:0006260	DNA replication	biological_process	0.30612	1	33	966	3451	126097	Cluster-26447.115132,Cluster-26447.111620,Cluster-26447.22371,Cluster-26447.207851,Cluster-26447.111493,Cluster-26447.57410,Cluster-26447.40614,Cluster-26447.48330,Cluster-26447.73778,Cluster-26447.127712,Cluster-26447.53906,Cluster-26447.107160,Cluster-26447.204617,Cluster-26447.216958,Cluster-26447.181772,Cluster-26447.71594,Cluster-26447.48334,Cluster-26447.3666,Cluster-26447.105,Cluster-26447…
GO:0009066	aspartate family amino acid metabolic process	biological_process	0.30628	1	13	966	1264	126097	Cluster-26447.200422,Cluster-26447.112768,Cluster-26447.103544,Cluster-26447.200419,Cluster-26447.9847,Cluster-26447.185243,Cluster-26447.113791,Cluster-26447.140660,Cluster-26447.44385,Cluster-26447.181705,Cluster-26447.98682,Cluster-26447.187623,Cluster-26447.724
GO:0007631	feeding behavior	biological_process	0.30678	1	1	966	50	126097	Cluster-26447.19284
GO:0005283	sodium:amino acid symporter activity	molecular_function	0.30808	1	1	966	35	126097	Cluster-26447.158601
GO:0005416	cation:amino acid symporter activity	molecular_function	0.30808	1	1	966	35	126097	Cluster-26447.158601
GO:0006099	tricarboxylic acid cycle	biological_process	0.3081	1	5	966	374	126097	Cluster-26447.117840,Cluster-26447.91395,Cluster-26447.42067,Cluster-26447.147762,Cluster-26447.206523
GO:0006101	citrate metabolic process	biological_process	0.3081	1	5	966	374	126097	Cluster-26447.147762,Cluster-26447.117840,Cluster-26447.91395,Cluster-26447.42067,Cluster-26447.206523
GO:0044260	cellular macromolecule metabolic process	biological_process	0.3088	1	350	966	41994	126097	Cluster-26447.105259,Cluster-26447.114501,Cluster-26447.9447,Cluster-26447.29217,Cluster-2195.0,Cluster-26447.164902,Cluster-26447.9847,Cluster-26447.42104,Cluster-26447.127712,Cluster-26447.85436,Cluster-26447.164912,Cluster-1340.1,Cluster-26447.13725,Cluster-26447.102122,Cluster-26447.12934,Cluster-26447.61385,Cluster-26447.114984,Cluster-26447.186121,Cluster-26447.67834,Cluster-26447.71594,Clu…
GO:0007187	G-protein coupled receptor signaling pathway, coupled to cyclic nucleotide second messenger	biological_process	0.31029	1	1	966	54	126097	Cluster-26447.156997
GO:0001071	nucleic acid binding transcription factor activity	molecular_function	0.31036	1	38	966	4463	126097	Cluster-26447.52943,Cluster-26447.27742,Cluster-26447.84191,Cluster-26447.147946,Cluster-26447.205876,Cluster-26447.22945,Cluster-26447.75347,Cluster-26447.125048,Cluster-26447.114984,Cluster-26447.81217,Cluster-26447.120301,Cluster-26447.135888,Cluster-26447.155828,Cluster-26447.160578,Cluster-26447.117596,Cluster-26447.206459,Cluster-26447.111493,Cluster-26447.119099,Cluster-26447.181705,Cluste…
GO:0003700	transcription factor activity, sequence-specific DNA binding	molecular_function	0.31036	1	38	966	4463	126097	Cluster-26447.130207,Cluster-26447.132072,Cluster-26447.117062,Cluster-26447.159386,Cluster-26447.13725,Cluster-26447.99213,Cluster-26447.117280,Cluster-26447.204182,Cluster-26447.146706,Cluster-26447.204617,Cluster-26447.190134,Cluster-26447.204304,Cluster-26447.207435,Cluster-26447.205044,Cluster-26447.45949,Cluster-26447.204981,Cluster-26447.53496,Cluster-26447.57410,Cluster-26447.111493,Clust…
GO:0048870	cell motility	biological_process	0.31047	1	6	966	565	126097	Cluster-26447.197869,Cluster-26447.135888,Cluster-26447.73778,Cluster-26447.197252,Cluster-26447.53497,Cluster-26447.147946
GO:0051674	localization of cell	biological_process	0.31047	1	6	966	565	126097	Cluster-26447.73778,Cluster-26447.135888,Cluster-26447.197869,Cluster-26447.147946,Cluster-26447.53497,Cluster-26447.197252
GO:0009124	nucleoside monophosphate biosynthetic process	biological_process	0.31061	1	7	966	687	126097	Cluster-26447.10934,Cluster-26447.75347,Cluster-26447.204182,Cluster-26447.10933,Cluster-26447.165528,Cluster-26447.100182,Cluster-26447.120543
GO:0016423	tRNA (guanine) methyltransferase activity	molecular_function	0.31083	1	3	966	204	126097	Cluster-26447.75347,Cluster-26447.57410,Cluster-26447.125593
GO:0051252	regulation of RNA metabolic process	biological_process	0.31095	1	94	966	11018	126097	Cluster-26447.72759,Cluster-26447.111620,Cluster-26447.204981,Cluster-26447.185243,Cluster-26447.119099,Cluster-26447.184313,Cluster-26447.122732,Cluster-26447.180526,Cluster-26447.40614,Cluster-26447.132072,Cluster-26447.159813,Cluster-26447.147331,Cluster-26447.190134,Cluster-26447.103862,Cluster-26447.195148,Cluster-26447.204182,Cluster-26447.117280,Cluster-26447.13725,Cluster-26447.147095,Clu…
GO:0050897	cobalt ion binding	molecular_function	0.31125	1	1	966	45	126097	Cluster-26447.88210
GO:0000981	RNA polymerase II transcription factor activity, sequence-specific DNA binding	molecular_function	0.31156	1	2	966	131	126097	Cluster-26447.52943,Cluster-26447.81217
GO:0006690	icosanoid metabolic process	biological_process	0.31179	1	1	966	43	126097	Cluster-26447.123640
GO:0006691	leukotriene metabolic process	biological_process	0.31179	1	1	966	43	126097	Cluster-26447.123640
GO:0033559	unsaturated fatty acid metabolic process	biological_process	0.31179	1	1	966	43	126097	Cluster-26447.123640
GO:1901568	fatty acid derivative metabolic process	biological_process	0.31179	1	1	966	43	126097	Cluster-26447.123640
GO:0034645	cellular macromolecule biosynthetic process	biological_process	0.31283	1	182	966	21865	126097	Cluster-26447.115132,Cluster-26447.9447,Cluster-26447.29217,Cluster-26447.122732,Cluster-26447.127712,Cluster-26447.42104,Cluster-26447.159813,Cluster-26447.129937,Cluster-26447.13725,Cluster-26447.204182,Cluster-26447.186121,Cluster-26447.105,Cluster-26447.85635,Cluster-26447.48334,Cluster-26447.71594,Cluster-26447.67834,Cluster-26447.114984,Cluster-26447.117840,Cluster-26447.22171,Cluster-26447…
GO:0006120	mitochondrial electron transport, NADH to ubiquinone	biological_process	0.31343	1	3	966	250	126097	Cluster-26447.99447,Cluster-26447.99074,Cluster-26447.84141
GO:0008023	transcription elongation factor complex	cellular_component	0.31416	1	2	966	131	126097	Cluster-26447.48425,Cluster-26447.48424
GO:0070206	protein trimerization	biological_process	0.31517	1	2	966	148	126097	Cluster-26447.73778,Cluster-26447.110949
GO:0009110	vitamin biosynthetic process	biological_process	0.31618	1	12	966	1242	126097	Cluster-26447.53906,Cluster-26447.58690,Cluster-26447.162961,Cluster-26447.8416,Cluster-26447.1470,Cluster-26447.113672,Cluster-26447.724,Cluster-26447.118735,Cluster-26447.216733,Cluster-26447.98682,Cluster-26447.745,Cluster-26447.197288
GO:0042364	water-soluble vitamin biosynthetic process	biological_process	0.31618	1	12	966	1242	126097	Cluster-26447.98682,Cluster-26447.216733,Cluster-26447.745,Cluster-26447.197288,Cluster-26447.724,Cluster-26447.118735,Cluster-26447.1470,Cluster-26447.113672,Cluster-26447.53906,Cluster-26447.8416,Cluster-26447.162961,Cluster-26447.58690
GO:0009916	alternative oxidase activity	molecular_function	0.31652	1	1	966	51	126097	Cluster-26447.56410
GO:0006231	dTMP biosynthetic process	biological_process	0.31669	1	1	966	42	126097	Cluster-26447.100182
GO:0042083	5,10-methylenetetrahydrofolate-dependent methyltransferase activity	molecular_function	0.31669	1	1	966	42	126097	Cluster-26447.100182
GO:0046073	dTMP metabolic process	biological_process	0.31669	1	1	966	42	126097	Cluster-26447.100182
GO:0015846	polyamine transport	biological_process	0.31673	1	1	966	38	126097	Cluster-26447.158601
GO:0010181	FMN binding	molecular_function	0.31727	1	3	966	222	126097	Cluster-26447.113791,Cluster-26447.140660,Cluster-26447.28719
GO:0043436	oxoacid metabolic process	biological_process	0.31741	1	68	966	7713	126097	Cluster-26447.200422,Cluster-26447.11275,Cluster-26447.9847,Cluster-26447.44385,Cluster-26447.153858,Cluster-26447.1434,Cluster-26447.205596,Cluster-26447.48824,Cluster-26447.12358,Cluster-26447.109407,Cluster-26447.155054,Cluster-26447.59922,Cluster-26447.185243,Cluster-26447.164902,Cluster-26447.109344,Cluster-26447.140660,Cluster-26447.187623,Cluster-26447.97680,Cluster-26447.118735,Cluster-26…
GO:0071826	ribonucleoprotein complex subunit organization	biological_process	0.31808	1	2	966	145	126097	Cluster-26447.156505,Cluster-26447.156490
GO:0018580	nitronate monooxygenase activity	molecular_function	0.31857	1	1	966	81	126097	Cluster-26447.98682
GO:0022414	reproductive process	biological_process	0.31889	1	11	966	1116	126097	Cluster-26447.75058,Cluster-26447.163880,Cluster-26447.50022,Cluster-26447.148206,Cluster-26447.201669,Cluster-26447.46051,Cluster-26447.85601,Cluster-26447.46049,Cluster-26447.190892,Cluster-26447.181705,Cluster-26447.1908
GO:0055086	nucleobase-containing small molecule metabolic process	biological_process	0.31967	1	52	966	6099	126097	Cluster-26447.99447,Cluster-26447.203505,Cluster-26447.22355,Cluster-26447.109407,Cluster-26447.155054,Cluster-26447.165528,Cluster-26447.9447,Cluster-26447.109344,Cluster-26447.140660,Cluster-26447.118735,Cluster-26447.10934,Cluster-26447.155043,Cluster-26447.96780,Cluster-26447.10621,Cluster-26447.113791,Cluster-26447.69821,Cluster-26447.146706,Cluster-26447.190134,Cluster-26447.109452,Cluster-…
GO:0016820	hydrolase activity, acting on acid anhydrides, catalyzing transmembrane movement of substances	molecular_function	0.31993	1	11	966	971	126097	Cluster-26447.150239,Cluster-26447.129949,Cluster-26447.84250,Cluster-26447.60113,Cluster-26447.86962,Cluster-26447.79310,Cluster-26447.120543,Cluster-26447.86969,Cluster-26447.67181,Cluster-26447.137118,Cluster-26447.77712
GO:0046149	pigment catabolic process	biological_process	0.3217	1	2	966	151	126097	Cluster-26447.91562,Cluster-26447.91564
GO:0009060	aerobic respiration	biological_process	0.32298	1	5	966	389	126097	Cluster-26447.147762,Cluster-26447.117840,Cluster-26447.91395,Cluster-26447.42067,Cluster-26447.206523
GO:0015849	organic acid transport	biological_process	0.32363	1	7	966	664	126097	Cluster-26447.58259,Cluster-26447.119868,Cluster-26447.76180,Cluster-26447.149497,Cluster-26447.158601,Cluster-26447.166736,Cluster-26447.12529
GO:0046942	carboxylic acid transport	biological_process	0.32363	1	7	966	664	126097	Cluster-26447.158601,Cluster-26447.149497,Cluster-26447.166736,Cluster-26447.12529,Cluster-26447.119868,Cluster-26447.76180,Cluster-26447.58259
GO:0015749	monosaccharide transport	biological_process	0.32369	1	1	966	36	126097	Cluster-26447.75058
GO:0008200	ion channel inhibitor activity	molecular_function	0.32497	1	6	966	523	126097	Cluster-26447.106238,Cluster-26447.216685,Cluster-26447.141384,Cluster-26447.205218,Cluster-26447.3892,Cluster-26447.84540
GO:0016248	channel inhibitor activity	molecular_function	0.32497	1	6	966	523	126097	Cluster-26447.106238,Cluster-26447.216685,Cluster-26447.141384,Cluster-26447.205218,Cluster-26447.3892,Cluster-26447.84540
GO:0009229	thiamine diphosphate biosynthetic process	biological_process	0.32531	1	1	966	48	126097	Cluster-26447.84141
GO:0042357	thiamine diphosphate metabolic process	biological_process	0.32531	1	1	966	48	126097	Cluster-26447.84141
GO:0005681	spliceosomal complex	cellular_component	0.32536	1	3	966	251	126097	Cluster-26447.73778,Cluster-26447.146700,Cluster-26447.113691
GO:0031411	gas vesicle	cellular_component	0.32559	1	1	966	47	126097	Cluster-26447.164716
GO:0016042	lipid catabolic process	biological_process	0.32597	1	5	966	418	126097	Cluster-26447.65262,Cluster-26447.83904,Cluster-26447.135732,Cluster-26447.86326,Cluster-26447.171743
GO:0004812	aminoacyl-tRNA ligase activity	molecular_function	0.32608	1	9	966	857	126097	Cluster-26447.113791,Cluster-26447.103544,Cluster-26447.209963,Cluster-26447.140660,Cluster-26447.63553,Cluster-26447.207435,Cluster-26447.113937,Cluster-26447.87637,Cluster-26447.146217
GO:0044281	small molecule metabolic process	biological_process	0.32636	1	116	966	13672	126097	Cluster-26447.9847,Cluster-26447.96780,Cluster-26447.11275,Cluster-26447.200422,Cluster-26447.205596,Cluster-26447.204182,Cluster-26447.99074,Cluster-26447.1434,Cluster-26447.153858,Cluster-26447.190134,Cluster-26447.44385,Cluster-26447.185243,Cluster-26447.59922,Cluster-26447.109407,Cluster-26447.155054,Cluster-26447.12358,Cluster-26447.48824,Cluster-26447.56410,Cluster-26447.99447,Cluster-26447…
GO:0033130	acetylcholine receptor binding	molecular_function	0.32644	1	1	966	37	126097	Cluster-21685.4
GO:0043495	protein anchor	molecular_function	0.32644	1	1	966	37	126097	Cluster-21685.4
GO:0003688	DNA replication origin binding	molecular_function	0.32664	1	1	966	42	126097	Cluster-26447.181772
GO:0039713	viral factory	cellular_component	0.32664	1	1	966	42	126097	Cluster-26447.181772
GO:0039715	nuclear viral factory	cellular_component	0.32664	1	1	966	42	126097	Cluster-26447.181772
GO:0046809	replication compartment	cellular_component	0.32664	1	1	966	42	126097	Cluster-26447.181772
GO:0042025	host cell nucleus	cellular_component	0.32683	1	8	966	805	126097	Cluster-26447.146706,Cluster-26447.181772,Cluster-26447.169437,Cluster-26447.48974,Cluster-26447.73778,Cluster-26447.48975,Cluster-26447.48972,Cluster-26447.164857
GO:0006082	organic acid metabolic process	biological_process	0.3273	1	68	966	7741	126097	Cluster-26447.84696,Cluster-26447.200419,Cluster-26447.117840,Cluster-26447.115264,Cluster-26447.9012,Cluster-26447.112768,Cluster-26447.147762,Cluster-26447.11482,Cluster-26447.58690,Cluster-26447.1470,Cluster-26447.108565,Cluster-26447.155053,Cluster-26447.149113,Cluster-26447.96215,Cluster-26447.46051,Cluster-26447.113937,Cluster-26447.118364,Cluster-26447.148200,Cluster-26447.12358,Cluster-26…
GO:0006749	glutathione metabolic process	biological_process	0.32757	1	3	966	269	126097	Cluster-26447.109452,Cluster-26447.60729,Cluster-26447.123640
GO:0017007	protein-bilin linkage	biological_process	0.32785	1	1	966	36	126097	Cluster-26447.76317
GO:0017009	protein-phycocyanobilin linkage	biological_process	0.32785	1	1	966	36	126097	Cluster-26447.76317
GO:0051920	peroxiredoxin activity	molecular_function	0.3279	1	1	966	55	126097	Cluster-26447.141958
GO:0016627	oxidoreductase activity, acting on the CH-CH group of donors	molecular_function	0.328	1	8	966	871	126097	Cluster-26447.135732,Cluster-26447.112768,Cluster-26447.64869,Cluster-26447.80998,Cluster-26447.88210,Cluster-26447.77096,Cluster-26447.98682,Cluster-26447.44385
GO:0000781	chromosome, telomeric region	cellular_component	0.32816	1	1	966	55	126097	Cluster-26447.34247
GO:0034453	microtubule anchoring	biological_process	0.32857	1	3	966	226	126097	Cluster-26447.135888,Cluster-26447.184773,Cluster-26447.184774
GO:0016756	glutathione gamma-glutamylcysteinyltransferase activity	molecular_function	0.33141	1	1	966	49	126097	Cluster-26447.67052
GO:0046937	phytochelatin metabolic process	biological_process	0.33141	1	1	966	49	126097	Cluster-26447.67052
GO:0046938	phytochelatin biosynthetic process	biological_process	0.33141	1	1	966	49	126097	Cluster-26447.67052
GO:0000272	polysaccharide catabolic process	biological_process	0.33173	1	2	966	134	126097	Cluster-26447.135625,Cluster-26447.135627
GO:0008131	primary amine oxidase activity	molecular_function	0.33182	1	1	966	64	126097	Cluster-26447.100703
GO:0016840	carbon-nitrogen lyase activity	molecular_function	0.33286	1	2	966	149	126097	Cluster-26447.169437,Cluster-26447.103544
GO:0008915	lipid-A-disaccharide synthase activity	molecular_function	0.33494	1	1	966	58	126097	Cluster-26447.121272
GO:0004089	carbonate dehydratase activity	molecular_function	0.33515	1	1	966	75	126097	Cluster-26447.110206
GO:0004181	metallocarboxypeptidase activity	molecular_function	0.33584	1	1	966	49	126097	Cluster-26447.90351
GO:0006605	protein targeting	biological_process	0.33603	1	12	966	1251	126097	Cluster-26447.73778,Cluster-26447.65687,Cluster-26447.26715,Cluster-26447.55764,Cluster-26447.107535,Cluster-20433.0,Cluster-26447.121926,Cluster-26447.184313,Cluster-26447.43983,Cluster-26447.120306,Cluster-26447.9095,Cluster-26447.125274
GO:0005044	scavenger receptor activity	molecular_function	0.33682	1	1	966	48	126097	Cluster-26447.153504
GO:0038024	cargo receptor activity	molecular_function	0.33682	1	1	966	48	126097	Cluster-26447.153504
GO:0007586	digestion	biological_process	0.33827	1	1	966	57	126097	Cluster-26447.65262
GO:0019838	growth factor binding	molecular_function	0.33832	1	1	966	41	126097	Cluster-26447.40233
GO:0006270	DNA replication initiation	biological_process	0.33851	1	6	966	570	126097	Cluster-26447.46077,Cluster-26447.107160,Cluster-26447.155419,Cluster-26447.53906,Cluster-26447.40614,Cluster-26447.127712
GO:0046039	GTP metabolic process	biological_process	0.34073	1	1	966	67	126097	Cluster-26447.85633
GO:0031082	BLOC complex	cellular_component	0.34299	1	1	966	58	126097	Cluster-26447.114984
GO:0031083	BLOC-1 complex	cellular_component	0.34299	1	1	966	58	126097	Cluster-26447.114984
GO:0016645	oxidoreductase activity, acting on the CH-NH group of donors	molecular_function	0.34308	1	4	966	325	126097	Cluster-26447.84696,Cluster-26447.12358,Cluster-26447.48824,Cluster-26447.118364
GO:0019203	carbohydrate phosphatase activity	molecular_function	0.34311	1	2	966	180	126097	Cluster-26447.109344,Cluster-26447.109407
GO:0050308	sugar-phosphatase activity	molecular_function	0.34311	1	2	966	180	126097	Cluster-26447.109344,Cluster-26447.109407
GO:0004970	ionotropic glutamate receptor activity	molecular_function	0.34317	1	2	966	128	126097	Cluster-26447.200669,Cluster-26447.102118
GO:0008066	glutamate receptor activity	molecular_function	0.34317	1	2	966	128	126097	Cluster-26447.102118,Cluster-26447.200669
GO:0006787	porphyrin-containing compound catabolic process	biological_process	0.34392	1	2	966	160	126097	Cluster-26447.91562,Cluster-26447.91564
GO:0033015	tetrapyrrole catabolic process	biological_process	0.34392	1	2	966	160	126097	Cluster-26447.91564,Cluster-26447.91562
GO:0019062	virion attachment to host cell	biological_process	0.34403	1	1	966	47	126097	Cluster-26447.157586
GO:0044650	adhesion of symbiont to host cell	biological_process	0.34403	1	1	966	47	126097	Cluster-26447.157586
GO:0016209	antioxidant activity	molecular_function	0.34482	1	7	966	834	126097	Cluster-26447.141958,Cluster-26447.88215,Cluster-26447.33592,Cluster-26447.116962,Cluster-26447.77676,Cluster-26447.167194,Cluster-26447.100182
GO:0009312	oligosaccharide biosynthetic process	biological_process	0.34496	1	5	966	461	126097	Cluster-26447.107986,Cluster-26447.121272,Cluster-26447.125593,Cluster-26447.35100,Cluster-26447.90686
GO:0010941	regulation of cell death	biological_process	0.34504	1	4	966	345	126097	Cluster-26447.94358,Cluster-26447.86266,Cluster-26447.74891,Cluster-26447.52385
GO:0042981	regulation of apoptotic process	biological_process	0.34504	1	4	966	345	126097	Cluster-26447.74891,Cluster-26447.52385,Cluster-26447.94358,Cluster-26447.86266
GO:0043067	regulation of programmed cell death	biological_process	0.34504	1	4	966	345	126097	Cluster-26447.86266,Cluster-26447.94358,Cluster-26447.52385,Cluster-26447.74891
GO:0007059	chromosome segregation	biological_process	0.34543	1	7	966	656	126097	Cluster-26447.99213,Cluster-26447.114984,Cluster-26447.53906,Cluster-26447.184774,Cluster-26447.135888,Cluster-26447.184773,Cluster-26447.34800
GO:0030436	asexual sporulation	biological_process	0.34563	1	2	966	126	126097	Cluster-26447.56531,Cluster-26447.159084
GO:0006097	glyoxylate cycle	biological_process	0.34762	1	1	966	46	126097	Cluster-26447.147762
GO:0005343	organic acid:sodium symporter activity	molecular_function	0.34953	1	1	966	45	126097	Cluster-26447.158601
GO:0051187	cofactor catabolic process	biological_process	0.34993	1	2	966	162	126097	Cluster-26447.91564,Cluster-26447.91562
GO:0006613	cotranslational protein targeting to membrane	biological_process	0.34999	1	5	966	476	126097	Cluster-26447.65687,Cluster-26447.125274,Cluster-26447.184313,Cluster-26447.120306,Cluster-26447.121926
GO:0009306	protein secretion	biological_process	0.35045	1	3	966	241	126097	Cluster-26447.33592,Cluster-26447.140126,Cluster-26447.83904
GO:0015711	organic anion transport	biological_process	0.35058	1	7	966	684	126097	Cluster-26447.12529,Cluster-26447.149497,Cluster-26447.158601,Cluster-26447.166736,Cluster-26447.76180,Cluster-26447.119868,Cluster-26447.58259
GO:0016838	carbon-oxygen lyase activity, acting on phosphates	molecular_function	0.35093	1	2	966	135	126097	Cluster-26447.206705,Cluster-26447.206703
GO:0004180	carboxypeptidase activity	molecular_function	0.35103	1	4	966	369	126097	Cluster-26447.90351,Cluster-26447.40114,Cluster-26447.26494,Cluster-26447.112036
GO:0007008	outer mitochondrial membrane organization	biological_process	0.35127	1	1	966	54	126097	Cluster-26447.43983
GO:0045040	protein import into mitochondrial outer membrane	biological_process	0.35127	1	1	966	54	126097	Cluster-26447.43983
GO:0090151	establishment of protein localization to mitochondrial membrane	biological_process	0.35127	1	1	966	54	126097	Cluster-26447.43983
GO:0042060	wound healing	biological_process	0.35162	1	5	966	459	126097	Cluster-26447.46049,Cluster-26447.46051,Cluster-26447.20884,Cluster-26447.181330,Cluster-26447.191579
GO:0010564	regulation of cell cycle process	biological_process	0.35193	1	4	966	334	126097	Cluster-26447.73989,Cluster-26447.99213,Cluster-26447.114984,Cluster-4869.0
GO:0031514	motile cilium	cellular_component	0.3532	1	4	966	370	126097	Cluster-26447.53497,Cluster-26447.147946,Cluster-26447.135888,Cluster-26447.73778
GO:0002115	store-operated calcium entry	biological_process	0.35375	1	1	966	58	126097	Cluster-26447.209390
GO:0051924	regulation of calcium ion transport	biological_process	0.35375	1	1	966	58	126097	Cluster-26447.209390
GO:2001256	regulation of store-operated calcium entry	biological_process	0.35375	1	1	966	58	126097	Cluster-26447.209390
GO:0015385	sodium:proton antiporter activity	molecular_function	0.35477	1	1	966	52	126097	Cluster-26447.182885
GO:0033647	host intracellular organelle	cellular_component	0.35482	1	8	966	829	126097	Cluster-26447.146706,Cluster-26447.181772,Cluster-26447.48974,Cluster-26447.73778,Cluster-26447.169437,Cluster-26447.48972,Cluster-26447.48975,Cluster-26447.164857
GO:0033648	host intracellular membrane-bounded organelle	cellular_component	0.35482	1	8	966	829	126097	Cluster-26447.48975,Cluster-26447.48972,Cluster-26447.169437,Cluster-26447.73778,Cluster-26447.48974,Cluster-26447.164857,Cluster-26447.146706,Cluster-26447.181772
GO:0044406	adhesion of symbiont to host	biological_process	0.35542	1	1	966	50	126097	Cluster-26447.157586
GO:0033013	tetrapyrrole metabolic process	biological_process	0.35615	1	9	966	948	126097	Cluster-26447.53906,Cluster-26447.83904,Cluster-26447.112768,Cluster-26447.91564,Cluster-26447.91562,Cluster-26447.216733,Cluster-26447.88210,Cluster-26447.745,Cluster-26447.102068
GO:2001070	starch binding	molecular_function	0.35726	1	2	966	122	126097	Cluster-26447.110145,Cluster-26447.62479
GO:0009611	response to wounding	biological_process	0.35811	1	5	966	469	126097	Cluster-26447.191579,Cluster-26447.46049,Cluster-26447.46051,Cluster-26447.181330,Cluster-26447.20884
GO:0007596	blood coagulation	biological_process	0.35826	1	4	966	364	126097	Cluster-26447.46049,Cluster-26447.20884,Cluster-26447.181330,Cluster-26447.46051
GO:0016855	racemase and epimerase activity, acting on amino acids and derivatives	molecular_function	0.36083	1	1	966	55	126097	Cluster-26447.187623
GO:0036361	racemase activity, acting on amino acids and derivatives	molecular_function	0.36083	1	1	966	55	126097	Cluster-26447.187623
GO:0061630	ubiquitin protein ligase activity	molecular_function	0.36102	1	4	966	337	126097	Cluster-26447.194966,Cluster-26447.82623,Cluster-26447.181675,Cluster-26447.81411
GO:0061659	ubiquitin-like protein ligase activity	molecular_function	0.36102	1	4	966	337	126097	Cluster-26447.81411,Cluster-26447.181675,Cluster-26447.82623,Cluster-26447.194966
GO:0008235	metalloexopeptidase activity	molecular_function	0.36124	1	1	966	56	126097	Cluster-26447.90351
GO:0098599	palmitoyl hydrolase activity	molecular_function	0.36135	1	1	966	47	126097	Cluster-26447.106982
GO:0009856	pollination	biological_process	0.36157	1	3	966	217	126097	Cluster-26447.201669,Cluster-26447.1908,Cluster-26447.148206
GO:0009875	pollen-pistil interaction	biological_process	0.36157	1	3	966	217	126097	Cluster-26447.148206,Cluster-26447.1908,Cluster-26447.201669
GO:0048544	recognition of pollen	biological_process	0.36157	1	3	966	217	126097	Cluster-26447.201669,Cluster-26447.1908,Cluster-26447.148206
GO:0001775	cell activation	biological_process	0.36173	1	4	966	356	126097	Cluster-26447.46051,Cluster-26447.181330,Cluster-26447.20884,Cluster-26447.46049
GO:0006954	inflammatory response	biological_process	0.36218	1	1	966	50	126097	Cluster-26447.133527
GO:0006820	anion transport	biological_process	0.36257	1	12	966	1209	126097	Cluster-26447.149497,Cluster-26447.204981,Cluster-26447.76180,Cluster-26447.79677,Cluster-26447.119868,Cluster-30803.0,Cluster-26447.12529,Cluster-26447.88210,Cluster-26447.158601,Cluster-26447.166736,Cluster-26447.58259,Cluster-26447.34247
GO:0006457	protein folding	biological_process	0.36323	1	8	966	944	126097	Cluster-26447.116003,Cluster-26447.181330,Cluster-26447.74527,Cluster-26447.135888,Cluster-26447.165798,Cluster-26447.112257,Cluster-26447.115993,Cluster-26447.100558
GO:0018196	peptidyl-asparagine modification	biological_process	0.36334	1	1	966	61	126097	Cluster-26447.63019
GO:0018279	protein N-linked glycosylation via asparagine	biological_process	0.36334	1	1	966	61	126097	Cluster-26447.63019
GO:0009297	pilus assembly	biological_process	0.36345	1	1	966	41	126097	Cluster-26447.166844
GO:0043711	pilus organization	biological_process	0.36345	1	1	966	41	126097	Cluster-26447.166844
GO:0042623	ATPase activity, coupled	molecular_function	0.36429	1	13	966	1212	126097	Cluster-26447.129949,Cluster-26447.150239,Cluster-26447.58449,Cluster-26447.84250,Cluster-26447.28276,Cluster-26447.79310,Cluster-26447.60113,Cluster-26447.86962,Cluster-26447.86969,Cluster-26447.120543,Cluster-26447.67181,Cluster-26447.120306,Cluster-26447.137118
GO:0016846	carbon-sulfur lyase activity	molecular_function	0.36458	1	2	966	161	126097	Cluster-26447.63369,Cluster-26447.99827
GO:0044212	transcription regulatory region DNA binding	molecular_function	0.36501	1	1	966	48	126097	Cluster-26447.81217
GO:0016597	amino acid binding	molecular_function	0.36546	1	4	966	363	126097	Cluster-26447.204812,Cluster-26447.56669,Cluster-26447.48073,Cluster-26447.122810
GO:0005672	transcription factor TFIIA complex	cellular_component	0.36761	1	2	966	160	126097	Cluster-26447.58799,Cluster-26447.172340
GO:0003857	3-hydroxyacyl-CoA dehydrogenase activity	molecular_function	0.36809	1	4	966	372	126097	Cluster-26447.112768,Cluster-26447.98682,Cluster-26447.9847,Cluster-26447.724
GO:0017006	protein-tetrapyrrole linkage	biological_process	0.36828	1	1	966	47	126097	Cluster-26447.76317
GO:0051701	interaction with host	biological_process	0.36901	1	9	966	921	126097	Cluster-26447.54173,Cluster-26447.86266,Cluster-26447.48972,Cluster-26447.48975,Cluster-26447.82299,Cluster-26447.147095,Cluster-26447.48974,Cluster-26447.33592,Cluster-26447.83472
GO:0090407	organophosphate biosynthetic process	biological_process	0.37006	1	18	966	2023	126097	Cluster-26447.118735,Cluster-26447.10934,Cluster-26447.102199,Cluster-26447.90686,Cluster-26447.10933,Cluster-26447.98682,Cluster-26447.197774,Cluster-26447.165528,Cluster-26447.120543,Cluster-26447.121272,Cluster-26447.75347,Cluster-26447.99255,Cluster-26447.28828,Cluster-26447.100182,Cluster-26447.84141,Cluster-26447.204182,Cluster-26447.85633,Cluster-26447.69821
GO:0048731	system development	biological_process	0.37038	1	4	966	350	126097	Cluster-26447.208563,Cluster-26447.173511,Cluster-26447.216685,Cluster-26447.9136
GO:0002429	immune response-activating cell surface receptor signaling pathway	biological_process	0.3708	1	1	966	57	126097	Cluster-26447.164902
GO:0002757	immune response-activating signal transduction	biological_process	0.3708	1	1	966	57	126097	Cluster-26447.164902
GO:0002768	immune response-regulating cell surface receptor signaling pathway	biological_process	0.3708	1	1	966	57	126097	Cluster-26447.164902
GO:0050851	antigen receptor-mediated signaling pathway	biological_process	0.3708	1	1	966	57	126097	Cluster-26447.164902
GO:0006959	humoral immune response	biological_process	0.37093	1	1	966	54	126097	Cluster-26447.191579
GO:0042381	hemolymph coagulation	biological_process	0.37093	1	1	966	54	126097	Cluster-26447.191579
GO:0006848	pyruvate transport	biological_process	0.37115	1	1	966	66	126097	Cluster-26447.12529
GO:0006850	mitochondrial pyruvate transport	biological_process	0.37115	1	1	966	66	126097	Cluster-26447.12529
GO:0015459	potassium channel regulator activity	molecular_function	0.37128	1	1	966	52	126097	Cluster-26447.3892
GO:0019870	potassium channel inhibitor activity	molecular_function	0.37128	1	1	966	52	126097	Cluster-26447.3892
GO:0006213	pyrimidine nucleoside metabolic process	biological_process	0.37145	1	1	966	74	126097	Cluster-26447.162631
GO:0004832	valine-tRNA ligase activity	molecular_function	0.37164	1	1	966	47	126097	Cluster-26447.207435
GO:0006438	valyl-tRNA aminoacylation	biological_process	0.37164	1	1	966	47	126097	Cluster-26447.207435
GO:0019205	nucleobase-containing compound kinase activity	molecular_function	0.37221	1	4	966	379	126097	Cluster-26447.165528,Cluster-26447.159125,Cluster-26447.75347,Cluster-26447.204182
GO:0008061	chitin binding	molecular_function	0.37269	1	2	966	151	126097	Cluster-26447.160578,Cluster-26447.128521
GO:0030674	protein binding, bridging	molecular_function	0.37277	1	4	966	365	126097	Cluster-26447.46051,Cluster-26447.181330,Cluster-26447.20884,Cluster-26447.46049
GO:0060090	binding, bridging	molecular_function	0.37277	1	4	966	365	126097	Cluster-26447.20884,Cluster-26447.181330,Cluster-26447.46051,Cluster-26447.46049
GO:0033365	protein localization to organelle	biological_process	0.37336	1	12	966	1275	126097	Cluster-26447.125274,Cluster-26447.45997,Cluster-26447.55764,Cluster-20433.0,Cluster-26447.107535,Cluster-26447.43983,Cluster-26447.184313,Cluster-26447.9095,Cluster-26447.120306,Cluster-26447.65687,Cluster-26447.26715,Cluster-26447.73778
GO:0016755	transferase activity, transferring amino-acyl groups	molecular_function	0.37446	1	2	966	149	126097	Cluster-26447.123640,Cluster-26447.67052
GO:0016730	oxidoreductase activity, acting on iron-sulfur proteins as donors	molecular_function	0.37485	1	1	966	53	126097	Cluster-26447.167600
GO:0030529	ribonucleoprotein complex	cellular_component	0.37514	1	40	966	5155	126097	Cluster-26447.122861,Cluster-26447.29217,Cluster-26447.140820,Cluster-26447.127219,Cluster-26447.124497,Cluster-26447.209963,Cluster-26447.107355,Cluster-26447.102600,Cluster-26447.45949,Cluster-26447.83005,Cluster-26447.144646,Cluster-26447.129937,Cluster-26447.99294,Cluster-26447.99213,Cluster-26447.174995,Cluster-26447.146700,Cluster-26447.45139,Cluster-26447.73778,Cluster-26447.42104,Cluster-…
GO:0016836	hydro-lyase activity	molecular_function	0.37519	1	7	966	751	126097	Cluster-26447.8416,Cluster-26447.83904,Cluster-26447.123064,Cluster-26447.102068,Cluster-26447.108565,Cluster-26447.110206,Cluster-26447.1470
GO:0016875	ligase activity, forming carbon-oxygen bonds	molecular_function	0.37635	1	9	966	920	126097	Cluster-26447.63553,Cluster-26447.140660,Cluster-26447.207435,Cluster-26447.113937,Cluster-26447.87637,Cluster-26447.146217,Cluster-26447.209963,Cluster-26447.103544,Cluster-26447.113791
GO:0016876	ligase activity, forming aminoacyl-tRNA and related compounds	molecular_function	0.37635	1	9	966	920	126097	Cluster-26447.113791,Cluster-26447.103544,Cluster-26447.209963,Cluster-26447.113937,Cluster-26447.146217,Cluster-26447.87637,Cluster-26447.207435,Cluster-26447.63553,Cluster-26447.140660
GO:0006612	protein targeting to membrane	biological_process	0.37641	1	5	966	499	126097	Cluster-26447.184313,Cluster-26447.120306,Cluster-26447.121926,Cluster-26447.65687,Cluster-26447.125274
GO:0032990	cell part morphogenesis	biological_process	0.37791	1	2	966	149	126097	Cluster-26447.216685,Cluster-26447.208563
GO:0048858	cell projection morphogenesis	biological_process	0.37791	1	2	966	149	126097	Cluster-26447.208563,Cluster-26447.216685
GO:1901564	organonitrogen compound metabolic process	biological_process	0.37813	1	143	966	17617	126097	Cluster-26447.109452,Cluster-26447.125593,Cluster-26447.181772,Cluster-26447.46049,Cluster-26447.69821,Cluster-26447.113791,Cluster-26447.53906,Cluster-26447.1432,Cluster-26447.146217,Cluster-26447.127219,Cluster-26447.155043,Cluster-26447.10934,Cluster-26447.209963,Cluster-26447.107355,Cluster-26447.67052,Cluster-26447.159650,Cluster-26447.160118,Cluster-26447.216733,Cluster-26447.119323,Cluster…
GO:0009007	site-specific DNA-methyltransferase (adenine-specific) activity	molecular_function	0.37846	1	1	966	50	126097	Cluster-26447.4592
GO:0009008	DNA-methyltransferase activity	molecular_function	0.37846	1	1	966	50	126097	Cluster-26447.4592
GO:0032775	DNA methylation on adenine	biological_process	0.37846	1	1	966	50	126097	Cluster-26447.4592
GO:0005096	GTPase activator activity	molecular_function	0.37853	1	4	966	335	126097	Cluster-26447.68826,Cluster-26447.120607,Cluster-26447.160775,Cluster-26447.32109
GO:0000045	autophagosome assembly	biological_process	0.37951	1	1	966	49	126097	Cluster-26447.118404
GO:0016236	macroautophagy	biological_process	0.37951	1	1	966	49	126097	Cluster-26447.118404
GO:0009165	nucleotide biosynthetic process	biological_process	0.37975	1	11	966	1220	126097	Cluster-26447.69821,Cluster-26447.75347,Cluster-26447.100182,Cluster-26447.10933,Cluster-26447.102199,Cluster-26447.204182,Cluster-26447.118735,Cluster-26447.10934,Cluster-26447.85633,Cluster-26447.120543,Cluster-26447.165528
GO:1901293	nucleoside phosphate biosynthetic process	biological_process	0.37975	1	11	966	1220	126097	Cluster-26447.165528,Cluster-26447.120543,Cluster-26447.85633,Cluster-26447.118735,Cluster-26447.10934,Cluster-26447.204182,Cluster-26447.102199,Cluster-26447.10933,Cluster-26447.100182,Cluster-26447.75347,Cluster-26447.69821
GO:0034641	cellular nitrogen compound metabolic process	biological_process	0.37996	1	282	966	34584	126097	Cluster-26447.119099,Cluster-26447.140820,Cluster-26447.203505,Cluster-26447.72759,Cluster-26447.186401,Cluster-26447.204734,Cluster-26447.95407,Cluster-26447.207851,Cluster-26447.109407,Cluster-26447.155054,Cluster-26447.144646,Cluster-26447.147331,Cluster-26447.103862,Cluster-26447.216958,Cluster-26447.200422,Cluster-26447.45139,Cluster-26447.132072,Cluster-26447.110133,Cluster-26447.120543,Clu…
GO:0001539	cilium or flagellum-dependent cell motility	biological_process	0.38035	1	2	966	160	126097	Cluster-26447.197869,Cluster-26447.197252
GO:0097588	archaeal or bacterial-type flagellum-dependent cell motility	biological_process	0.38035	1	2	966	160	126097	Cluster-26447.197869,Cluster-26447.197252
GO:0008172	S-methyltransferase activity	molecular_function	0.38165	1	2	966	151	126097	Cluster-26447.113672,Cluster-26447.58690
GO:0008234	cysteine-type peptidase activity	molecular_function	0.38292	1	11	966	1107	126097	Cluster-26447.114635,Cluster-26447.22355,Cluster-26447.10621,Cluster-26447.113281,Cluster-26447.208230,Cluster-26447.37151,Cluster-26447.146706,Cluster-26447.124528,Cluster-26447.12834,Cluster-26447.11090,Cluster-26447.174150
GO:0007050	cell cycle arrest	biological_process	0.38437	1	1	966	69	126097	Cluster-26447.57455
GO:0055036	virion membrane	cellular_component	0.38509	1	1	966	67	126097	Cluster-26447.173016
GO:0042537	benzene-containing compound metabolic process	biological_process	0.38542	1	5	966	499	126097	Cluster-26447.112768,Cluster-26447.9012,Cluster-26447.98682,Cluster-26447.9847,Cluster-26447.724
GO:0042430	indole-containing compound metabolic process	biological_process	0.38648	1	9	966	977	126097	Cluster-26447.9847,Cluster-26447.8416,Cluster-26447.108565,Cluster-26447.103544,Cluster-26447.169437,Cluster-26447.112768,Cluster-26447.1470,Cluster-26447.724,Cluster-26447.98682
GO:0051082	unfolded protein binding	molecular_function	0.38698	1	7	966	769	126097	Cluster-26447.124172,Cluster-26447.95734,Cluster-26447.165798,Cluster-26447.114984,Cluster-26447.181330,Cluster-26447.99213,Cluster-26447.112257
GO:0002764	immune response-regulating signaling pathway	biological_process	0.38699	1	1	966	60	126097	Cluster-26447.164902
GO:0018958	phenol-containing compound metabolic process	biological_process	0.38727	1	1	966	70	126097	Cluster-26447.70648
GO:0000796	condensin complex	cellular_component	0.38811	1	1	966	68	126097	Cluster-26447.53906
GO:0007076	mitotic chromosome condensation	biological_process	0.38811	1	1	966	68	126097	Cluster-26447.53906
GO:0042162	telomeric DNA binding	molecular_function	0.38895	1	1	966	53	126097	Cluster-26447.34247
GO:0004527	exonuclease activity	molecular_function	0.38968	1	7	966	672	126097	Cluster-26447.58690,Cluster-26447.132750,Cluster-26447.114984,Cluster-26447.135089,Cluster-26447.3666,Cluster-26447.119064,Cluster-26447.207435
GO:0034660	ncRNA metabolic process	biological_process	0.38972	1	32	966	3467	126097	Cluster-26447.98682,Cluster-26447.123519,Cluster-26447.64499,Cluster-26447.33687,Cluster-26447.48334,Cluster-26447.103544,Cluster-26447.58449,Cluster-26447.75347,Cluster-26447.113937,Cluster-26447.200976,Cluster-26447.37937,Cluster-26447.181385,Cluster-26447.140660,Cluster-26447.63553,Cluster-26447.184313,Cluster-26447.165528,Cluster-26447.146217,Cluster-26447.80998,Cluster-26447.57410,Cluster-26…
GO:0051302	regulation of cell division	biological_process	0.39047	1	4	966	350	126097	Cluster-26447.73989,Cluster-26447.99213,Cluster-4869.0,Cluster-26447.114984
GO:0009055	electron carrier activity	molecular_function	0.39089	1	12	966	1351	126097	Cluster-26447.134629,Cluster-26447.180581,Cluster-26447.33592,Cluster-26447.181385,Cluster-26447.197923,Cluster-26447.184919,Cluster-26447.35718,Cluster-26447.37937,Cluster-26447.111620,Cluster-26447.190892,Cluster-26447.169514,Cluster-26447.113291
GO:0008284	positive regulation of cell proliferation	biological_process	0.3914	1	1	966	56	126097	Cluster-26447.163186
GO:0004197	cysteine-type endopeptidase activity	molecular_function	0.39591	1	7	966	670	126097	Cluster-26447.174150,Cluster-26447.113281,Cluster-26447.124528,Cluster-26447.146706,Cluster-26447.114635,Cluster-26447.10621,Cluster-26447.22355
GO:0006743	ubiquinone metabolic process	biological_process	0.39661	1	3	966	301	126097	Cluster-26447.84141,Cluster-26447.56410,Cluster-26447.99447
GO:0006744	ubiquinone biosynthetic process	biological_process	0.39661	1	3	966	301	126097	Cluster-26447.84141,Cluster-26447.99447,Cluster-26447.56410
GO:0006518	peptide metabolic process	biological_process	0.39693	1	44	966	5575	126097	Cluster-26447.174995,Cluster-26447.99213,Cluster-26447.99294,Cluster-26447.109452,Cluster-26447.129937,Cluster-26447.87637,Cluster-26447.207435,Cluster-26447.113791,Cluster-26447.42104,Cluster-26447.45139,Cluster-26447.127219,Cluster-26447.124497,Cluster-26447.146217,Cluster-26447.140820,Cluster-26447.140660,Cluster-26447.63553,Cluster-26447.29217,Cluster-26447.122861,Cluster-26447.144646,Cluster…
GO:0016011	dystroglycan complex	cellular_component	0.39837	1	1	966	61	126097	Cluster-26447.65167
GO:0016012	sarcoglycan complex	cellular_component	0.39837	1	1	966	61	126097	Cluster-26447.65167
GO:0007417	central nervous system development	biological_process	0.39872	1	1	966	49	126097	Cluster-26447.173511
GO:0007420	brain development	biological_process	0.39872	1	1	966	49	126097	Cluster-26447.173511
GO:0060322	head development	biological_process	0.39872	1	1	966	49	126097	Cluster-26447.173511
GO:0000940	condensed chromosome outer kinetochore	cellular_component	0.39899	1	4	966	363	126097	Cluster-26447.184774,Cluster-26447.135888,Cluster-26447.184773,Cluster-26447.34800
GO:0040007	growth	biological_process	0.39931	1	4	966	367	126097	Cluster-26447.163186,Cluster-26447.179322,Cluster-26447.22371,Cluster-31356.0
GO:0006399	tRNA metabolic process	biological_process	0.39932	1	27	966	2866	126097	Cluster-26447.200976,Cluster-26447.37937,Cluster-26447.9847,Cluster-26447.181385,Cluster-26447.113791,Cluster-26447.207435,Cluster-26447.113937,Cluster-26447.190134,Cluster-26447.87637,Cluster-26447.125593,Cluster-26447.209963,Cluster-26447.103544,Cluster-9264.0,Cluster-26447.95406,Cluster-26447.95407,Cluster-26447.75347,Cluster-26447.58449,Cluster-26447.63553,Cluster-26447.140660,Cluster-26447.8…
GO:0000049	tRNA binding	molecular_function	0.40015	1	2	966	167	126097	Cluster-26447.200976,Cluster-26447.209963
GO:0006549	isoleucine metabolic process	biological_process	0.40159	1	5	966	498	126097	Cluster-26447.9847,Cluster-26447.724,Cluster-26447.207435,Cluster-26447.112768,Cluster-26447.98682
GO:0006573	valine metabolic process	biological_process	0.40159	1	5	966	498	126097	Cluster-26447.207435,Cluster-26447.112768,Cluster-26447.98682,Cluster-26447.9847,Cluster-26447.724
GO:0009156	ribonucleoside monophosphate biosynthetic process	biological_process	0.40226	1	6	966	645	126097	Cluster-26447.165528,Cluster-26447.120543,Cluster-26447.10934,Cluster-26447.75347,Cluster-26447.204182,Cluster-26447.10933
GO:0016655	oxidoreductase activity, acting on NAD(P)H, quinone or similar compound as acceptor	molecular_function	0.40269	1	4	966	421	126097	Cluster-26447.77681,Cluster-26447.107355,Cluster-26447.99447,Cluster-26447.84141
GO:0009236	cobalamin biosynthetic process	biological_process	0.40359	1	3	966	269	126097	Cluster-26447.53906,Cluster-26447.216733,Cluster-26447.745
GO:0015833	peptide transport	biological_process	0.40465	1	1	966	62	126097	Cluster-26447.84540
GO:0008716	D-alanine-D-alanine ligase activity	molecular_function	0.40585	1	1	966	51	126097	Cluster-26447.115264
GO:0046144	D-alanine family amino acid metabolic process	biological_process	0.40585	1	1	966	51	126097	Cluster-26447.115264
GO:0046436	D-alanine metabolic process	biological_process	0.40585	1	1	966	51	126097	Cluster-26447.115264
GO:0043086	negative regulation of catalytic activity	biological_process	0.40588	1	4	966	370	126097	Cluster-26447.114984,Cluster-26447.99213,Cluster-26447.75058,Cluster-26447.63369
GO:0044092	negative regulation of molecular function	biological_process	0.40588	1	4	966	370	126097	Cluster-26447.63369,Cluster-26447.114984,Cluster-26447.99213,Cluster-26447.75058
GO:0016888	endodeoxyribonuclease activity, producing 5'-phosphomonoesters	molecular_function	0.406	1	3	966	256	126097	Cluster-26447.69821,Cluster-26447.212926,Cluster-26447.107555
GO:0090304	nucleic acid metabolic process	biological_process	0.40782	1	202	966	23911	126097	Cluster-26447.94858,Cluster-26447.160578,Cluster-26447.101528,Cluster-26447.127758,Cluster-26447.155419,Cluster-26447.113291,Cluster-26447.113937,Cluster-26447.87879,Cluster-26447.58449,Cluster-26447.143611,Cluster-26447.94229,Cluster-26447.26494,Cluster-26447.40760,Cluster-26447.182885,Cluster-26447.105017,Cluster-26447.33687,Cluster-26447.147095,Cluster-26447.110145,Cluster-26447.3666,Cluster-7…
GO:0043021	ribonucleoprotein complex binding	molecular_function	0.40808	1	2	966	203	126097	Cluster-26447.156505,Cluster-26447.156490
GO:0045017	glycerolipid biosynthetic process	biological_process	0.40901	1	4	966	355	126097	Cluster-8641.3,Cluster-26447.67834,Cluster-26447.28828,Cluster-26447.99255
GO:0006541	glutamine metabolic process	biological_process	0.40917	1	2	966	176	126097	Cluster-26447.88622,Cluster-26447.97680
GO:0009152	purine ribonucleotide biosynthetic process	biological_process	0.4105	1	7	966	791	126097	Cluster-26447.102199,Cluster-26447.10933,Cluster-26447.69821,Cluster-26447.118735,Cluster-26447.10934,Cluster-26447.120543,Cluster-26447.85633
GO:1903510	mucopolysaccharide metabolic process	biological_process	0.41112	1	1	966	62	126097	Cluster-26447.122456
GO:0015696	ammonium transport	biological_process	0.41129	1	1	966	71	126097	Cluster-26447.9447
GO:0006412	translation	biological_process	0.41159	1	40	966	5095	126097	Cluster-26447.29217,Cluster-26447.63553,Cluster-26447.140660,Cluster-26447.122861,Cluster-26447.140820,Cluster-26447.146217,Cluster-26447.124497,Cluster-26447.127219,Cluster-26447.209963,Cluster-26447.107355,Cluster-26447.102600,Cluster-26447.83005,Cluster-26447.144646,Cluster-26447.207435,Cluster-26447.87637,Cluster-26447.129937,Cluster-26447.99213,Cluster-26447.99294,Cluster-26447.174995,Cluste…
GO:0005634	nucleus	cellular_component	0.41194	1	103	966	12074	126097	Cluster-26447.48424,Cluster-26447.184773,Cluster-26447.82623,Cluster-26447.113691,Cluster-26447.133824,Cluster-26447.109000,Cluster-26447.60056,Cluster-26447.52943,Cluster-26447.130453,Cluster-26447.87881,Cluster-26447.135888,Cluster-26447.135875,Cluster-26447.38965,Cluster-26447.28276,Cluster-26447.48425,Cluster-26447.168299,Cluster-26447.94538,Cluster-26447.124172,Cluster-26447.55764,Cluster-26…
GO:0000103	sulfate assimilation	biological_process	0.41202	1	2	966	178	126097	Cluster-26447.65687,Cluster-26447.190134
GO:0004020	adenylylsulfate kinase activity	molecular_function	0.41202	1	2	966	178	126097	Cluster-26447.65687,Cluster-26447.190134
GO:0005794	Golgi apparatus	cellular_component	0.41298	1	7	966	679	126097	Cluster-26447.152478,Cluster-26447.84191,Cluster-26447.190892,Cluster-26447.48978,Cluster-26447.13906,Cluster-26447.43676,Cluster-26447.107986
GO:0016701	oxidoreductase activity, acting on single donors with incorporation of molecular oxygen	molecular_function	0.41333	1	4	966	478	126097	Cluster-26447.98682,Cluster-26447.63027,Cluster-26447.176793,Cluster-26447.6629
GO:0070403	NAD+ binding	molecular_function	0.41355	1	1	966	63	126097	Cluster-26447.175970
GO:0045861	negative regulation of proteolysis	biological_process	0.41357	1	3	966	252	126097	Cluster-26447.75058,Cluster-26447.99213,Cluster-26447.114984
GO:0000148	1,3-beta-D-glucan synthase complex	cellular_component	0.41416	1	2	966	102	126097	Cluster-26447.85635,Cluster-26447.107804
GO:0003843	1,3-beta-D-glucan synthase activity	molecular_function	0.41416	1	2	966	102	126097	Cluster-26447.85635,Cluster-26447.107804
GO:0006074	(1->3)-beta-D-glucan metabolic process	biological_process	0.41416	1	2	966	102	126097	Cluster-26447.107804,Cluster-26447.85635
GO:0006075	(1->3)-beta-D-glucan biosynthetic process	biological_process	0.41416	1	2	966	102	126097	Cluster-26447.85635,Cluster-26447.107804
GO:0046483	heterocycle metabolic process	biological_process	0.41424	1	254	966	30707	126097	Cluster-26447.103862,Cluster-26447.190134,Cluster-26447.147331,Cluster-26447.174995,Cluster-26447.117280,Cluster-26447.216958,Cluster-26447.195148,Cluster-26447.99074,Cluster-26447.110133,Cluster-26447.132072,Cluster-26447.96780,Cluster-26447.40614,Cluster-26447.48330,Cluster-26447.135627,Cluster-26447.36444,Cluster-26447.83904,Cluster-26447.184313,Cluster-26447.119099,Cluster-26447.111493,Cluste…
GO:0006368	transcription elongation from RNA polymerase II promoter	biological_process	0.41453	1	2	966	167	126097	Cluster-26447.48424,Cluster-26447.48425
GO:0044237	cellular metabolic process	biological_process	0.41499	1	444	966	54983	126097	Cluster-26447.63553,Cluster-26447.181705,Cluster-26447.121926,Cluster-26447.68831,Cluster-26447.135625,Cluster-26447.70052,Cluster-26447.88622,Cluster-26447.205044,Cluster-26447.204304,Cluster-26447.186119,Cluster-26447.87637,Cluster-26447.107986,Cluster-26447.204617,Cluster-26447.188421,Cluster-26447.99213,Cluster-1202.0,Cluster-26447.10621,Cluster-26447.113672,Cluster-26447.91038,Cluster-26447.…
GO:0005845	mRNA cap binding complex	cellular_component	0.41617	1	1	966	66	126097	Cluster-26447.158588
GO:0034518	RNA cap binding complex	cellular_component	0.41617	1	1	966	66	126097	Cluster-26447.158588
GO:0000975	regulatory region DNA binding	molecular_function	0.41675	1	1	966	59	126097	Cluster-26447.81217
GO:0001067	regulatory region nucleic acid binding	molecular_function	0.41675	1	1	966	59	126097	Cluster-26447.81217
GO:0031167	rRNA methylation	biological_process	0.41713	1	2	966	153	126097	Cluster-26447.48334,Cluster-26447.48330
GO:0006098	pentose-phosphate shunt	biological_process	0.41759	1	7	966	825	126097	Cluster-26447.60729,Cluster-26447.109407,Cluster-26447.724,Cluster-26447.153858,Cluster-26447.109452,Cluster-26447.148200,Cluster-26447.109344
GO:0006814	sodium ion transport	biological_process	0.41864	1	6	966	642	126097	Cluster-26447.84141,Cluster-26447.58690,Cluster-26447.182885,Cluster-26447.158601,Cluster-26447.99447,Cluster-26447.107355
GO:0004045	aminoacyl-tRNA hydrolase activity	molecular_function	0.42021	1	1	966	81	126097	Cluster-26447.86173
GO:0006550	isoleucine catabolic process	biological_process	0.42066	1	4	966	409	126097	Cluster-26447.112768,Cluster-26447.98682,Cluster-26447.9847,Cluster-26447.724
GO:0006552	leucine catabolic process	biological_process	0.42066	1	4	966	409	126097	Cluster-26447.724,Cluster-26447.9847,Cluster-26447.98682,Cluster-26447.112768
GO:0006574	valine catabolic process	biological_process	0.42066	1	4	966	409	126097	Cluster-26447.112768,Cluster-26447.98682,Cluster-26447.9847,Cluster-26447.724
GO:0009083	branched-chain amino acid catabolic process	biological_process	0.42066	1	4	966	409	126097	Cluster-26447.98682,Cluster-26447.112768,Cluster-26447.724,Cluster-26447.9847
GO:0007275	multicellular organismal development	biological_process	0.42068	1	11	966	1183	126097	Cluster-26447.123882,Cluster-26447.50022,Cluster-26447.75058,Cluster-27210.2,Cluster-26447.173511,Cluster-26447.9136,Cluster-26447.564,Cluster-26447.216685,Cluster-26447.208563,Cluster-26447.181705,Cluster-26447.111493
GO:0051726	regulation of cell cycle	biological_process	0.42107	1	6	966	623	126097	Cluster-26447.73989,Cluster-4675.0,Cluster-26447.99213,Cluster-4869.0,Cluster-26447.114984,Cluster-26447.57455
GO:0003997	acyl-CoA oxidase activity	molecular_function	0.42158	1	1	966	51	126097	Cluster-26447.135732
GO:0006635	fatty acid beta-oxidation	biological_process	0.42158	1	1	966	51	126097	Cluster-26447.135732
GO:0009062	fatty acid catabolic process	biological_process	0.42158	1	1	966	51	126097	Cluster-26447.135732
GO:0019395	fatty acid oxidation	biological_process	0.42158	1	1	966	51	126097	Cluster-26447.135732
GO:0034440	lipid oxidation	biological_process	0.42158	1	1	966	51	126097	Cluster-26447.135732
GO:0051156	glucose 6-phosphate metabolic process	biological_process	0.42176	1	7	966	829	126097	Cluster-26447.109452,Cluster-26447.109344,Cluster-26447.148200,Cluster-26447.60729,Cluster-26447.109407,Cluster-26447.724,Cluster-26447.153858
GO:0005929	cilium	cellular_component	0.42226	1	4	966	404	126097	Cluster-26447.135888,Cluster-26447.73778,Cluster-26447.53497,Cluster-26447.147946
GO:0048585	negative regulation of response to stimulus	biological_process	0.42242	1	2	966	176	126097	Cluster-27210.2,Cluster-26447.211242
GO:0014065	phosphatidylinositol 3-kinase signaling	biological_process	0.42242	1	1	966	75	126097	Cluster-26447.204930
GO:0014066	regulation of phosphatidylinositol 3-kinase signaling	biological_process	0.42242	1	1	966	75	126097	Cluster-26447.204930
GO:0014068	positive regulation of phosphatidylinositol 3-kinase signaling	biological_process	0.42242	1	1	966	75	126097	Cluster-26447.204930
GO:0043548	phosphatidylinositol 3-kinase binding	molecular_function	0.42242	1	1	966	75	126097	Cluster-26447.204930
GO:0048015	phosphatidylinositol-mediated signaling	biological_process	0.42242	1	1	966	75	126097	Cluster-26447.204930
GO:0048017	inositol lipid-mediated signaling	biological_process	0.42242	1	1	966	75	126097	Cluster-26447.204930
GO:0034470	ncRNA processing	biological_process	0.42271	1	23	966	2503	126097	Cluster-26447.9847,Cluster-26447.181385,Cluster-26447.53906,Cluster-26447.48330,Cluster-26447.200976,Cluster-26447.37937,Cluster-26447.125593,Cluster-26447.190134,Cluster-26447.58449,Cluster-26447.75347,Cluster-26447.33687,Cluster-9264.0,Cluster-26447.95406,Cluster-26447.48334,Cluster-26447.95407,Cluster-26447.64499,Cluster-26447.57410,Cluster-26447.123064,Cluster-26447.98682,Cluster-26447.165528…
GO:0043043	peptide biosynthetic process	biological_process	0.42428	1	41	966	5233	126097	Cluster-26447.87637,Cluster-26447.129937,Cluster-26447.207435,Cluster-26447.174995,Cluster-26447.99213,Cluster-26447.99294,Cluster-26447.45139,Cluster-26447.113791,Cluster-26447.42104,Cluster-26447.146217,Cluster-26447.63553,Cluster-26447.140660,Cluster-26447.29217,Cluster-26447.122861,Cluster-26447.140820,Cluster-26447.124497,Cluster-26447.127219,Cluster-26447.107355,Cluster-26447.209963,Cluster…
GO:0007033	vacuole organization	biological_process	0.42507	1	1	966	57	126097	Cluster-26447.118404
GO:0008033	tRNA processing	biological_process	0.42543	1	18	966	1890	126097	Cluster-26447.95406,Cluster-9264.0,Cluster-26447.95407,Cluster-26447.75347,Cluster-26447.58449,Cluster-26447.80998,Cluster-26447.165528,Cluster-26447.98682,Cluster-26447.184313,Cluster-26447.57410,Cluster-26447.64499,Cluster-26447.123064,Cluster-26447.200976,Cluster-26447.37937,Cluster-26447.9847,Cluster-26447.181385,Cluster-26447.190134,Cluster-26447.125593
GO:0002253	activation of immune response	biological_process	0.42565	1	1	966	70	126097	Cluster-26447.164902
GO:0010605	negative regulation of macromolecule metabolic process	biological_process	0.42592	1	7	966	708	126097	Cluster-26447.107804,Cluster-27328.1,Cluster-26447.107816,Cluster-26447.10814,Cluster-26447.99213,Cluster-26447.114984,Cluster-26447.75058
GO:0008641	small protein activating enzyme activity	molecular_function	0.42606	1	2	966	175	126097	Cluster-26447.724,Cluster-26447.110123
GO:0009892	negative regulation of metabolic process	biological_process	0.42658	1	8	966	832	126097	Cluster-26447.63369,Cluster-26447.99213,Cluster-26447.107816,Cluster-26447.75058,Cluster-26447.114984,Cluster-26447.107804,Cluster-27328.1,Cluster-26447.10814
GO:0017080	sodium channel regulator activity	molecular_function	0.42784	1	2	966	162	126097	Cluster-26447.205218,Cluster-26447.84540
GO:0019871	sodium channel inhibitor activity	molecular_function	0.42784	1	2	966	162	126097	Cluster-26447.205218,Cluster-26447.84540
GO:0009235	cobalamin metabolic process	biological_process	0.42795	1	3	966	282	126097	Cluster-26447.745,Cluster-26447.216733,Cluster-26447.53906
GO:0016835	carbon-oxygen lyase activity	molecular_function	0.42944	1	9	966	996	126097	Cluster-26447.123064,Cluster-26447.110206,Cluster-26447.102068,Cluster-26447.8416,Cluster-26447.206703,Cluster-26447.83904,Cluster-26447.206705,Cluster-26447.108565,Cluster-26447.1470
GO:0004616	phosphogluconate dehydrogenase (decarboxylating) activity	molecular_function	0.43125	1	3	966	290	126097	Cluster-26447.148200,Cluster-26447.153858,Cluster-26447.724
GO:0019521	D-gluconate metabolic process	biological_process	0.43125	1	3	966	290	126097	Cluster-26447.148200,Cluster-26447.724,Cluster-26447.153858
GO:0033014	tetrapyrrole biosynthetic process	biological_process	0.43251	1	7	966	764	126097	Cluster-26447.112768,Cluster-26447.102068,Cluster-26447.216733,Cluster-26447.745,Cluster-26447.88210,Cluster-26447.83904,Cluster-26447.53906
GO:0000070	mitotic sister chromatid segregation	biological_process	0.43281	1	3	966	274	126097	Cluster-26447.114984,Cluster-26447.99213,Cluster-26447.53906
GO:0000819	sister chromatid segregation	biological_process	0.43281	1	3	966	274	126097	Cluster-26447.53906,Cluster-26447.114984,Cluster-26447.99213
GO:0019682	glyceraldehyde-3-phosphate metabolic process	biological_process	0.43334	1	7	966	839	126097	Cluster-26447.153858,Cluster-26447.724,Cluster-26447.109407,Cluster-26447.60729,Cluster-26447.109344,Cluster-26447.148200,Cluster-26447.109452
GO:0015370	solute:sodium symporter activity	molecular_function	0.43353	1	1	966	58	126097	Cluster-26447.158601
GO:0019520	aldonic acid metabolic process	biological_process	0.43422	1	3	966	293	126097	Cluster-26447.148200,Cluster-26447.153858,Cluster-26447.724
GO:0005310	dicarboxylic acid transmembrane transporter activity	molecular_function	0.4356	1	1	966	63	126097	Cluster-26447.158601
GO:0010959	regulation of metal ion transport	biological_process	0.43578	1	1	966	76	126097	Cluster-26447.209390
GO:0043269	regulation of ion transport	biological_process	0.43578	1	1	966	76	126097	Cluster-26447.209390
GO:0006418	tRNA aminoacylation for protein translation	biological_process	0.43629	1	9	966	927	126097	Cluster-26447.113791,Cluster-26447.209963,Cluster-26447.103544,Cluster-26447.87637,Cluster-26447.113937,Cluster-26447.146217,Cluster-26447.207435,Cluster-26447.140660,Cluster-26447.63553
GO:0009620	response to fungus	biological_process	0.43689	1	1	966	83	126097	Cluster-26447.167327
GO:0050832	defense response to fungus	biological_process	0.43689	1	1	966	83	126097	Cluster-26447.167327
GO:0007006	mitochondrial membrane organization	biological_process	0.43693	1	1	966	73	126097	Cluster-26447.43983
GO:1901137	carbohydrate derivative biosynthetic process	biological_process	0.43736	1	21	966	2450	126097	Cluster-26447.69821,Cluster-26447.194966,Cluster-26447.44436,Cluster-26447.204182,Cluster-26447.85633,Cluster-26447.75347,Cluster-26447.13906,Cluster-26447.115264,Cluster-26447.99255,Cluster-26447.100182,Cluster-26447.28828,Cluster-26447.118735,Cluster-26447.10934,Cluster-26447.10933,Cluster-26447.59916,Cluster-26447.63019,Cluster-26447.102199,Cluster-26447.90686,Cluster-26447.165528,Cluster-2644…
GO:0008654	phospholipid biosynthetic process	biological_process	0.43792	1	5	966	517	126097	Cluster-26447.90686,Cluster-26447.28828,Cluster-26447.121272,Cluster-26447.197774,Cluster-26447.99255
GO:0006858	extracellular transport	biological_process	0.43796	1	1	966	63	126097	Cluster-26447.216685
GO:0009719	response to endogenous stimulus	biological_process	0.43809	1	4	966	391	126097	Cluster-26447.195148,Cluster-26447.143611,Cluster-26447.211131,Cluster-26447.56531
GO:0008565	protein transporter activity	molecular_function	0.43817	1	4	966	427	126097	Cluster-26447.153383,Cluster-26447.73778,Cluster-26447.55764,Cluster-26447.182885
GO:0000778	condensed nuclear chromosome kinetochore	cellular_component	0.4389	1	3	966	278	126097	Cluster-26447.184774,Cluster-26447.184773,Cluster-26447.135888
GO:0000780	condensed nuclear chromosome, centromeric region	cellular_component	0.4389	1	3	966	278	126097	Cluster-26447.184774,Cluster-26447.135888,Cluster-26447.184773
GO:0000942	condensed nuclear chromosome outer kinetochore	cellular_component	0.4389	1	3	966	278	126097	Cluster-26447.184774,Cluster-26447.184773,Cluster-26447.135888
GO:0042729	DASH complex	cellular_component	0.4389	1	3	966	278	126097	Cluster-26447.135888,Cluster-26447.184773,Cluster-26447.184774
GO:0016247	channel regulator activity	molecular_function	0.43902	1	6	966	599	126097	Cluster-26447.84540,Cluster-26447.141384,Cluster-26447.205218,Cluster-26447.3892,Cluster-26447.106238,Cluster-26447.216685
GO:0007606	sensory perception of chemical stimulus	biological_process	0.44029	1	2	966	178	126097	Cluster-26447.44385,Cluster-26447.156997
GO:0003950	NAD+ ADP-ribosyltransferase activity	molecular_function	0.44139	1	2	966	146	126097	Cluster-26447.81057,Cluster-26447.77281
GO:0035091	phosphatidylinositol binding	molecular_function	0.44278	1	2	966	163	126097	Cluster-26447.69247,Cluster-26447.164716
GO:0015718	monocarboxylic acid transport	biological_process	0.4433	1	2	966	172	126097	Cluster-26447.12529,Cluster-26447.58259
GO:0004888	transmembrane signaling receptor activity	molecular_function	0.4433	1	7	966	747	126097	Cluster-26447.156997,Cluster-26447.33127,Cluster-26447.200669,Cluster-26447.102118,Cluster-26447.2402,Cluster-26447.56531,Cluster-26447.44385
GO:0000105	histidine biosynthetic process	biological_process	0.44435	1	2	966	240	126097	Cluster-26447.8416,Cluster-26447.1470
GO:0000777	condensed chromosome kinetochore	cellular_component	0.44489	1	4	966	387	126097	Cluster-26447.184774,Cluster-26447.34800,Cluster-26447.135888,Cluster-26447.184773
GO:0000779	condensed chromosome, centromeric region	cellular_component	0.44489	1	4	966	387	126097	Cluster-26447.184774,Cluster-26447.34800,Cluster-26447.135888,Cluster-26447.184773
GO:1902580	single-organism cellular localization	biological_process	0.44517	1	12	966	1349	126097	Cluster-26447.73778,Cluster-26447.26715,Cluster-26447.65687,Cluster-26447.9095,Cluster-26447.120306,Cluster-26447.184313,Cluster-26447.43983,Cluster-26447.121926,Cluster-26447.107535,Cluster-20433.0,Cluster-26447.55764,Cluster-26447.125274
GO:0000428	DNA-directed RNA polymerase complex	cellular_component	0.44668	1	6	966	675	126097	Cluster-26447.172340,Cluster-26447.48425,Cluster-26447.58799,Cluster-26447.135875,Cluster-26447.48424,Cluster-26447.3666
GO:0055029	nuclear DNA-directed RNA polymerase complex	cellular_component	0.44668	1	6	966	675	126097	Cluster-26447.172340,Cluster-26447.58799,Cluster-26447.48425,Cluster-26447.135875,Cluster-26447.48424,Cluster-26447.3666
GO:0010033	response to organic substance	biological_process	0.44755	1	5	966	497	126097	Cluster-26447.56531,Cluster-26447.211131,Cluster-26447.211242,Cluster-26447.195148,Cluster-26447.143611
GO:0051346	negative regulation of hydrolase activity	biological_process	0.44805	1	2	966	178	126097	Cluster-26447.63369,Cluster-26447.75058
GO:0046416	D-amino acid metabolic process	biological_process	0.44875	1	1	966	62	126097	Cluster-26447.115264
GO:0006030	chitin metabolic process	biological_process	0.44897	1	2	966	171	126097	Cluster-26447.160578,Cluster-26447.59916
GO:1901071	glucosamine-containing compound metabolic process	biological_process	0.44897	1	2	966	171	126097	Cluster-26447.160578,Cluster-26447.59916
GO:0006725	cellular aromatic compound metabolic process	biological_process	0.44917	1	252	966	30597	126097	Cluster-26447.75347,Cluster-26447.125048,Cluster-26447.113691,Cluster-26447.205876,Cluster-26447.48424,Cluster-26447.100182,Cluster-26447.87881,Cluster-26447.91564,Cluster-26447.46077,Cluster-26447.10933,Cluster-26447.120306,Cluster-26447.173016,Cluster-26447.94538,Cluster-26447.8416,Cluster-26447.168299,Cluster-26447.65064,Cluster-26447.135888,Cluster-26447.122456,Cluster-26447.119323,Cluster-26…
GO:0001897	cytolysis by symbiont of host cells	biological_process	0.44925	1	1	966	63	126097	Cluster-26447.83472
GO:0019836	hemolysis by symbiont of host erythrocytes	biological_process	0.44925	1	1	966	63	126097	Cluster-26447.83472
GO:0016778	diphosphotransferase activity	molecular_function	0.4495	1	1	966	67	126097	Cluster-26447.84141
GO:0031406	carboxylic acid binding	molecular_function	0.44988	1	4	966	403	126097	Cluster-26447.48073,Cluster-26447.122810,Cluster-26447.204812,Cluster-26447.56669
GO:0043177	organic acid binding	molecular_function	0.44988	1	4	966	403	126097	Cluster-26447.48073,Cluster-26447.122810,Cluster-26447.204812,Cluster-26447.56669
GO:0006164	purine nucleotide biosynthetic process	biological_process	0.45046	1	7	966	824	126097	Cluster-26447.10934,Cluster-26447.118735,Cluster-26447.102199,Cluster-26447.10933,Cluster-26447.69821,Cluster-26447.120543,Cluster-26447.85633
GO:0051049	regulation of transport	biological_process	0.45122	1	2	966	181	126097	Cluster-26447.75058,Cluster-26447.209390
GO:0006547	histidine metabolic process	biological_process	0.45165	1	2	966	245	126097	Cluster-26447.1470,Cluster-26447.8416
GO:0052803	imidazole-containing compound metabolic process	biological_process	0.45165	1	2	966	245	126097	Cluster-26447.1470,Cluster-26447.8416
GO:0044550	secondary metabolite biosynthetic process	biological_process	0.45328	1	2	966	192	126097	Cluster-26447.67052,Cluster-26447.70648
GO:0006139	nucleobase-containing compound metabolic process	biological_process	0.45344	1	233	966	28182	126097	Cluster-26447.118735,Cluster-26447.122732,Cluster-2195.0,Cluster-26447.9447,Cluster-9264.0,Cluster-26447.115132,Cluster-26447.99447,Cluster-26447.204182,Cluster-26447.153858,Cluster-26447.13725,Cluster-26447.61385,Cluster-26447.9847,Cluster-26447.159813,Cluster-26447.164912,Cluster-26447.85436,Cluster-1340.1,Cluster-26447.127712,Cluster-26447.132750,Cluster-26447.13031,Cluster-26447.94540,Cluster…
GO:0016591	DNA-directed RNA polymerase II, holoenzyme	cellular_component	0.45538	1	5	966	505	126097	Cluster-26447.48424,Cluster-26447.3666,Cluster-26447.172340,Cluster-26447.58799,Cluster-26447.48425
GO:0050660	flavin adenine dinucleotide binding	molecular_function	0.45687	1	8	966	891	126097	Cluster-26447.9847,Cluster-26447.95407,Cluster-26447.95406,Cluster-26447.64869,Cluster-26447.123064,Cluster-26447.98682,Cluster-26447.185494,Cluster-26447.80998
GO:0006560	proline metabolic process	biological_process	0.45703	1	3	966	308	126097	Cluster-26447.146217,Cluster-26447.113937,Cluster-26447.48824
GO:0010562	positive regulation of phosphorus metabolic process	biological_process	0.45717	1	1	966	69	126097	Cluster-26447.163186
GO:0031401	positive regulation of protein modification process	biological_process	0.45717	1	1	966	69	126097	Cluster-26447.163186
GO:0045937	positive regulation of phosphate metabolic process	biological_process	0.45717	1	1	966	69	126097	Cluster-26447.163186
GO:0003724	RNA helicase activity	molecular_function	0.45814	1	7	966	715	126097	Cluster-9264.0,Cluster-26447.159125,Cluster-26447.120306,Cluster-26447.184313,Cluster-26447.159203,Cluster-26447.93222,Cluster-26447.58449
GO:0000413	protein peptidyl-prolyl isomerization	biological_process	0.45868	1	2	966	217	126097	Cluster-26447.74527,Cluster-26447.100558
GO:0003755	peptidyl-prolyl cis-trans isomerase activity	molecular_function	0.45868	1	2	966	217	126097	Cluster-26447.100558,Cluster-26447.74527
GO:0016859	cis-trans isomerase activity	molecular_function	0.45868	1	2	966	217	126097	Cluster-26447.100558,Cluster-26447.74527
GO:0009069	serine family amino acid metabolic process	biological_process	0.46029	1	11	966	1141	126097	Cluster-26447.1433,Cluster-26447.46049,Cluster-26447.176793,Cluster-26447.205596,Cluster-26447.46051,Cluster-26447.1434,Cluster-26447.1432,Cluster-26447.11482,Cluster-26447.201669,Cluster-26447.11275,Cluster-26447.205592
GO:0044380	protein localization to cytoskeleton	biological_process	0.46042	1	1	966	61	126097	Cluster-26447.45997
GO:0071988	protein localization to spindle pole body	biological_process	0.46042	1	1	966	61	126097	Cluster-26447.45997
GO:0072698	protein localization to microtubule cytoskeleton	biological_process	0.46042	1	1	966	61	126097	Cluster-26447.45997
GO:0008855	exodeoxyribonuclease VII activity	molecular_function	0.46097	1	3	966	296	126097	Cluster-26447.207435,Cluster-26447.114984,Cluster-26447.132750
GO:0009318	exodeoxyribonuclease VII complex	cellular_component	0.46097	1	3	966	296	126097	Cluster-26447.207435,Cluster-26447.132750,Cluster-26447.114984
GO:1901361	organic cyclic compound catabolic process	biological_process	0.46244	1	11	966	1241	126097	Cluster-26447.107555,Cluster-26447.207435,Cluster-26447.162631,Cluster-26447.91562,Cluster-26447.91564,Cluster-26447.132750,Cluster-26447.212926,Cluster-26447.26693,Cluster-26447.9012,Cluster-26447.114984,Cluster-26447.69821
GO:0008037	cell recognition	biological_process	0.4627	1	3	966	255	126097	Cluster-26447.1908,Cluster-26447.201669,Cluster-26447.148206
GO:0006551	leucine metabolic process	biological_process	0.46419	1	5	966	537	126097	Cluster-26447.98682,Cluster-26447.112768,Cluster-26447.207435,Cluster-26447.724,Cluster-26447.9847
GO:0009085	lysine biosynthetic process	biological_process	0.46419	1	2	966	188	126097	Cluster-26447.187623,Cluster-26447.44385
GO:0009089	lysine biosynthetic process via diaminopimelate	biological_process	0.46419	1	2	966	188	126097	Cluster-26447.44385,Cluster-26447.187623
GO:0046451	diaminopimelate metabolic process	biological_process	0.46419	1	2	966	188	126097	Cluster-26447.187623,Cluster-26447.44385
GO:0031554	regulation of DNA-templated transcription, termination	biological_process	0.46423	1	1	966	70	126097	Cluster-26447.185243
GO:0018966	styrene metabolic process	biological_process	0.46425	1	1	966	71	126097	Cluster-26447.9012
GO:0042207	styrene catabolic process	biological_process	0.46425	1	1	966	71	126097	Cluster-26447.9012
GO:1900673	olefin metabolic process	biological_process	0.46425	1	1	966	71	126097	Cluster-26447.9012
GO:0010109	regulation of photosynthesis	biological_process	0.46463	1	1	966	90	126097	Cluster-26447.158588
GO:0042548	regulation of photosynthesis, light reaction	biological_process	0.46463	1	1	966	90	126097	Cluster-26447.158588
GO:0042549	photosystem II stabilization	biological_process	0.46463	1	1	966	90	126097	Cluster-26447.158588
GO:0043467	regulation of generation of precursor metabolites and energy	biological_process	0.46463	1	1	966	90	126097	Cluster-26447.158588
GO:0007094	mitotic spindle assembly checkpoint	biological_process	0.46708	1	2	966	171	126097	Cluster-26447.99213,Cluster-26447.114984
GO:0009895	negative regulation of catabolic process	biological_process	0.46708	1	2	966	171	126097	Cluster-26447.114984,Cluster-26447.99213
GO:0031330	negative regulation of cellular catabolic process	biological_process	0.46708	1	2	966	171	126097	Cluster-26447.99213,Cluster-26447.114984
GO:0031396	regulation of protein ubiquitination	biological_process	0.46708	1	2	966	171	126097	Cluster-26447.99213,Cluster-26447.114984
GO:0031397	negative regulation of protein ubiquitination	biological_process	0.46708	1	2	966	171	126097	Cluster-26447.114984,Cluster-26447.99213
GO:0031577	spindle checkpoint	biological_process	0.46708	1	2	966	171	126097	Cluster-26447.99213,Cluster-26447.114984
GO:0032435	negative regulation of proteasomal ubiquitin-dependent protein catabolic process	biological_process	0.46708	1	2	966	171	126097	Cluster-26447.114984,Cluster-26447.99213
GO:0033046	negative regulation of sister chromatid segregation	biological_process	0.46708	1	2	966	171	126097	Cluster-26447.114984,Cluster-26447.99213
GO:0033048	negative regulation of mitotic sister chromatid segregation	biological_process	0.46708	1	2	966	171	126097	Cluster-26447.114984,Cluster-26447.99213
GO:0042177	negative regulation of protein catabolic process	biological_process	0.46708	1	2	966	171	126097	Cluster-26447.99213,Cluster-26447.114984
GO:0045839	negative regulation of mitotic nuclear division	biological_process	0.46708	1	2	966	171	126097	Cluster-26447.114984,Cluster-26447.99213
GO:0045841	negative regulation of mitotic metaphase/anaphase transition	biological_process	0.46708	1	2	966	171	126097	Cluster-26447.114984,Cluster-26447.99213
GO:0051340	regulation of ligase activity	biological_process	0.46708	1	2	966	171	126097	Cluster-26447.99213,Cluster-26447.114984
GO:0051352	negative regulation of ligase activity	biological_process	0.46708	1	2	966	171	126097	Cluster-26447.114984,Cluster-26447.99213
GO:0051436	negative regulation of ubiquitin-protein ligase activity involved in mitotic cell cycle	biological_process	0.46708	1	2	966	171	126097	Cluster-26447.114984,Cluster-26447.99213
GO:0051438	regulation of ubiquitin-protein transferase activity	biological_process	0.46708	1	2	966	171	126097	Cluster-26447.114984,Cluster-26447.99213
GO:0051439	regulation of ubiquitin-protein ligase activity involved in mitotic cell cycle	biological_process	0.46708	1	2	966	171	126097	Cluster-26447.99213,Cluster-26447.114984
GO:0051444	negative regulation of ubiquitin-protein transferase activity	biological_process	0.46708	1	2	966	171	126097	Cluster-26447.114984,Cluster-26447.99213
GO:0051985	negative regulation of chromosome segregation	biological_process	0.46708	1	2	966	171	126097	Cluster-26447.99213,Cluster-26447.114984
GO:0071173	spindle assembly checkpoint	biological_process	0.46708	1	2	966	171	126097	Cluster-26447.99213,Cluster-26447.114984
GO:0071174	mitotic spindle checkpoint	biological_process	0.46708	1	2	966	171	126097	Cluster-26447.99213,Cluster-26447.114984
GO:1901799	negative regulation of proteasomal protein catabolic process	biological_process	0.46708	1	2	966	171	126097	Cluster-26447.114984,Cluster-26447.99213
GO:1902100	negative regulation of metaphase/anaphase transition of cell cycle	biological_process	0.46708	1	2	966	171	126097	Cluster-26447.99213,Cluster-26447.114984
GO:1903051	negative regulation of proteolysis involved in cellular protein catabolic process	biological_process	0.46708	1	2	966	171	126097	Cluster-26447.99213,Cluster-26447.114984
GO:1903320	regulation of protein modification by small protein conjugation or removal	biological_process	0.46708	1	2	966	171	126097	Cluster-26447.114984,Cluster-26447.99213
GO:1903321	negative regulation of protein modification by small protein conjugation or removal	biological_process	0.46708	1	2	966	171	126097	Cluster-26447.114984,Cluster-26447.99213
GO:1903363	negative regulation of cellular protein catabolic process	biological_process	0.46708	1	2	966	171	126097	Cluster-26447.114984,Cluster-26447.99213
GO:1904666	regulation of ubiquitin protein ligase activity	biological_process	0.46708	1	2	966	171	126097	Cluster-26447.99213,Cluster-26447.114984
GO:1904667	negative regulation of ubiquitin protein ligase activity	biological_process	0.46708	1	2	966	171	126097	Cluster-26447.99213,Cluster-26447.114984
GO:2000816	negative regulation of mitotic sister chromatid separation	biological_process	0.46708	1	2	966	171	126097	Cluster-26447.114984,Cluster-26447.99213
GO:2001251	negative regulation of chromosome organization	biological_process	0.46708	1	2	966	171	126097	Cluster-26447.114984,Cluster-26447.99213
GO:0008026	ATP-dependent helicase activity	molecular_function	0.46719	1	3	966	257	126097	Cluster-26447.28276,Cluster-26447.120306,Cluster-26447.58449
GO:0070035	purine NTP-dependent helicase activity	molecular_function	0.46719	1	3	966	257	126097	Cluster-26447.120306,Cluster-26447.28276,Cluster-26447.58449
GO:0030111	regulation of Wnt signaling pathway	biological_process	0.46846	1	1	966	68	126097	Cluster-27210.2
GO:0015296	anion:cation symporter activity	molecular_function	0.46852	1	1	966	62	126097	Cluster-26447.158601
GO:0008649	rRNA methyltransferase activity	molecular_function	0.46874	1	1	966	83	126097	Cluster-26447.125593
GO:0008614	pyridoxine metabolic process	biological_process	0.4688	1	1	966	85	126097	Cluster-26447.197288
GO:0008615	pyridoxine biosynthetic process	biological_process	0.4688	1	1	966	85	126097	Cluster-26447.197288
GO:0005515	protein binding	molecular_function	0.46933	1	249	966	29072	126097	Cluster-26447.99450,Cluster-26447.181330,Cluster-26447.97308,Cluster-26447.48330,Cluster-26447.132894,Cluster-26447.174995,Cluster-26447.42173,Cluster-26447.117280,Cluster-26447.216958,Cluster-26447.188058,Cluster-26447.190134,Cluster-26447.141508,Cluster-26447.177111,Cluster-26447.107167,Cluster-26447.205786,Cluster-26447.92578,Cluster-26447.205794,Cluster-26447.186401,Cluster-26447.22371,Cluste…
GO:0045786	negative regulation of cell cycle	biological_process	0.46964	1	3	966	305	126097	Cluster-26447.57455,Cluster-26447.114984,Cluster-26447.99213
GO:0006885	regulation of pH	biological_process	0.4698	1	2	966	187	126097	Cluster-26447.105501,Cluster-26447.182885
GO:0055067	monovalent inorganic cation homeostasis	biological_process	0.4698	1	2	966	187	126097	Cluster-26447.182885,Cluster-26447.105501
GO:0008408	3'-5' exonuclease activity	molecular_function	0.46999	1	3	966	263	126097	Cluster-26447.58690,Cluster-26447.3666,Cluster-26447.119064
GO:0017004	cytochrome complex assembly	biological_process	0.47021	1	3	966	303	126097	Cluster-26447.93149,Cluster-1298.0,Cluster-26447.179322
GO:0022904	respiratory electron transport chain	biological_process	0.47038	1	7	966	802	126097	Cluster-26447.99447,Cluster-26447.96780,Cluster-26447.37937,Cluster-26447.99074,Cluster-26447.91523,Cluster-26447.84141,Cluster-26447.181385
GO:0001907	killing by symbiont of host cells	biological_process	0.47079	1	1	966	68	126097	Cluster-26447.83472
GO:0044004	disruption by symbiont of host cell	biological_process	0.47079	1	1	966	68	126097	Cluster-26447.83472
GO:0008519	ammonium transmembrane transporter activity	molecular_function	0.47093	1	1	966	79	126097	Cluster-26447.9447
GO:0018874	benzoate metabolic process	biological_process	0.47165	1	4	966	420	126097	Cluster-26447.112768,Cluster-26447.98682,Cluster-26447.9847,Cluster-26447.724
GO:0015976	carbon utilization	biological_process	0.47169	1	5	966	612	126097	Cluster-26447.109407,Cluster-26447.91395,Cluster-26447.42067,Cluster-26447.117840,Cluster-26447.109344
GO:0009733	response to auxin	biological_process	0.47194	1	1	966	103	126097	Cluster-26447.211131
GO:0000793	condensed chromosome	cellular_component	0.47204	1	5	966	536	126097	Cluster-26447.184773,Cluster-26447.135888,Cluster-26447.34800,Cluster-26447.184774,Cluster-26447.53906
GO:0019058	viral life cycle	biological_process	0.47294	1	16	966	1820	126097	Cluster-26447.216958,Cluster-26447.12834,Cluster-26447.179565,Cluster-26447.61385,Cluster-26447.164857,Cluster-26447.48975,Cluster-26447.122456,Cluster-26447.169437,Cluster-26447.48974,Cluster-26447.122732,Cluster-26447.55901,Cluster-26447.157586,Cluster-26447.187623,Cluster-26447.48972,Cluster-26447.33049,Cluster-26447.28590
GO:0017176	phosphatidylinositol N-acetylglucosaminyltransferase activity	molecular_function	0.47322	1	1	966	71	126097	Cluster-26447.99255
GO:0003896	DNA primase activity	molecular_function	0.47324	1	2	966	182	126097	Cluster-26447.57410,Cluster-26447.204617
GO:1901988	negative regulation of cell cycle phase transition	biological_process	0.47411	1	2	966	175	126097	Cluster-26447.99213,Cluster-26447.114984
GO:1901991	negative regulation of mitotic cell cycle phase transition	biological_process	0.47411	1	2	966	175	126097	Cluster-26447.114984,Cluster-26447.99213
GO:0007224	smoothened signaling pathway	biological_process	0.4745	1	1	966	78	126097	Cluster-26447.35718
GO:0044448	cell cortex part	cellular_component	0.47476	1	5	966	506	126097	Cluster-26447.195148,Cluster-26447.9136,Cluster-26447.84540,Cluster-26447.34800,Cluster-26447.118800
GO:0009267	cellular response to starvation	biological_process	0.47503	1	1	966	78	126097	Cluster-26447.118404
GO:0031667	response to nutrient levels	biological_process	0.47503	1	1	966	78	126097	Cluster-26447.118404
GO:0031669	cellular response to nutrient levels	biological_process	0.47503	1	1	966	78	126097	Cluster-26447.118404
GO:0042594	response to starvation	biological_process	0.47503	1	1	966	78	126097	Cluster-26447.118404
GO:2000112	regulation of cellular macromolecule biosynthetic process	biological_process	0.47504	1	94	966	11529	126097	Cluster-26447.204981,Cluster-26447.185243,Cluster-26447.72759,Cluster-26447.111620,Cluster-26447.122732,Cluster-26447.180526,Cluster-26447.119099,Cluster-26447.184313,Cluster-26447.159813,Cluster-26447.40614,Cluster-26447.132072,Cluster-26447.204182,Cluster-26447.195148,Cluster-26447.117280,Cluster-26447.13725,Cluster-26447.147331,Cluster-26447.190134,Cluster-26447.103862,Cluster-26447.114984,Clu…
GO:0004185	serine-type carboxypeptidase activity	molecular_function	0.47561	1	3	966	317	126097	Cluster-26447.112036,Cluster-26447.40114,Cluster-26447.26494
GO:0006367	transcription initiation from RNA polymerase II promoter	biological_process	0.47776	1	3	966	328	126097	Cluster-26447.115609,Cluster-26447.58799,Cluster-26447.172340
GO:0006308	DNA catabolic process	biological_process	0.47882	1	6	966	651	126097	Cluster-26447.69821,Cluster-26447.114984,Cluster-26447.212926,Cluster-26447.132750,Cluster-26447.207435,Cluster-26447.107555
GO:0014070	response to organic cyclic compound	biological_process	0.47944	1	1	966	69	126097	Cluster-26447.56531
GO:0006354	DNA-templated transcription, elongation	biological_process	0.47966	1	2	966	197	126097	Cluster-26447.48425,Cluster-26447.48424
GO:0031412	gas vesicle organization	biological_process	0.47997	1	1	966	79	126097	Cluster-26447.164716
GO:0051801	cytolysis in other organism involved in symbiotic interaction	biological_process	0.48267	1	1	966	70	126097	Cluster-26447.83472
GO:0052331	hemolysis in other organism involved in symbiotic interaction	biological_process	0.48267	1	1	966	70	126097	Cluster-26447.83472
GO:0006269	DNA replication, synthesis of RNA primer	biological_process	0.48288	1	2	966	184	126097	Cluster-26447.204617,Cluster-26447.57410
GO:0006873	cellular ion homeostasis	biological_process	0.48332	1	3	966	377	126097	Cluster-1202.0,Cluster-1202.1,Cluster-26447.182885
GO:0006875	cellular metal ion homeostasis	biological_process	0.48332	1	3	966	377	126097	Cluster-1202.1,Cluster-1202.0,Cluster-26447.182885
GO:0030003	cellular cation homeostasis	biological_process	0.48332	1	3	966	377	126097	Cluster-1202.0,Cluster-1202.1,Cluster-26447.182885
GO:0034599	cellular response to oxidative stress	biological_process	0.48335	1	1	966	102	126097	Cluster-26447.166092
GO:0000439	core TFIIH complex	cellular_component	0.48481	1	1	966	67	126097	Cluster-26447.28276
GO:0030261	chromosome condensation	biological_process	0.48488	1	1	966	92	126097	Cluster-26447.53906
GO:0019439	aromatic compound catabolic process	biological_process	0.48515	1	11	966	1258	126097	Cluster-26447.9012,Cluster-26447.69821,Cluster-26447.114984,Cluster-26447.162631,Cluster-26447.91562,Cluster-26447.207435,Cluster-26447.107555,Cluster-26447.26693,Cluster-26447.212926,Cluster-26447.91564,Cluster-26447.132750
GO:0046983	protein dimerization activity	molecular_function	0.48545	1	16	966	1886	126097	Cluster-26447.113331,Cluster-26447.112382,Cluster-26447.117627,Cluster-26447.200976,Cluster-26447.73778,Cluster-26447.135888,Cluster-26447.46051,Cluster-26447.107659,Cluster-26447.46049,Cluster-26447.128521,Cluster-26447.205044,Cluster-26447.204304,Cluster-26447.137866,Cluster-26447.45949,Cluster-26447.2402,Cluster-26447.147946
GO:0000162	tryptophan biosynthetic process	biological_process	0.48623	1	4	966	466	126097	Cluster-26447.8416,Cluster-26447.108565,Cluster-26447.1470,Cluster-26447.98682
GO:0006571	tyrosine biosynthetic process	biological_process	0.48623	1	4	966	466	126097	Cluster-26447.8416,Cluster-26447.108565,Cluster-26447.1470,Cluster-26447.98682
GO:0009073	aromatic amino acid family biosynthetic process	biological_process	0.48623	1	4	966	466	126097	Cluster-26447.8416,Cluster-26447.108565,Cluster-26447.1470,Cluster-26447.98682
GO:0009094	L-phenylalanine biosynthetic process	biological_process	0.48623	1	4	966	466	126097	Cluster-26447.8416,Cluster-26447.108565,Cluster-26447.1470,Cluster-26447.98682
GO:0009095	aromatic amino acid family biosynthetic process, prephenate pathway	biological_process	0.48623	1	4	966	466	126097	Cluster-26447.108565,Cluster-26447.1470,Cluster-26447.98682,Cluster-26447.8416
GO:0046219	indolalkylamine biosynthetic process	biological_process	0.48623	1	4	966	466	126097	Cluster-26447.8416,Cluster-26447.108565,Cluster-26447.1470,Cluster-26447.98682
GO:1902223	erythrose 4-phosphate/phosphoenolpyruvate family amino acid biosynthetic process	biological_process	0.48623	1	4	966	466	126097	Cluster-26447.8416,Cluster-26447.108565,Cluster-26447.98682,Cluster-26447.1470
GO:0004673	protein histidine kinase activity	molecular_function	0.48624	1	4	966	389	126097	Cluster-26447.137118,Cluster-26447.48424,Cluster-26447.79310,Cluster-26447.48425
GO:0009365	protein histidine kinase complex	cellular_component	0.48624	1	4	966	389	126097	Cluster-26447.48425,Cluster-26447.79310,Cluster-26447.137118,Cluster-26447.48424
GO:0016775	phosphotransferase activity, nitrogenous group as acceptor	molecular_function	0.48624	1	4	966	389	126097	Cluster-26447.79310,Cluster-26447.48425,Cluster-26447.48424,Cluster-26447.137118
GO:0046700	heterocycle catabolic process	biological_process	0.4865	1	10	966	1153	126097	Cluster-26447.69821,Cluster-26447.114984,Cluster-26447.207435,Cluster-26447.107555,Cluster-26447.162631,Cluster-26447.91562,Cluster-26447.26693,Cluster-26447.212926,Cluster-26447.91564,Cluster-26447.132750
GO:0043038	amino acid activation	biological_process	0.48668	1	9	966	990	126097	Cluster-26447.209963,Cluster-26447.103544,Cluster-26447.113791,Cluster-26447.63553,Cluster-26447.140660,Cluster-26447.207435,Cluster-26447.146217,Cluster-26447.113937,Cluster-26447.87637
GO:0043039	tRNA aminoacylation	biological_process	0.48668	1	9	966	990	126097	Cluster-26447.103544,Cluster-26447.209963,Cluster-26447.113791,Cluster-26447.113937,Cluster-26447.146217,Cluster-26447.87637,Cluster-26447.207435,Cluster-26447.63553,Cluster-26447.140660
GO:0019954	asexual reproduction	biological_process	0.48746	1	5	966	556	126097	Cluster-26447.56531,Cluster-26447.73778,Cluster-26447.142960,Cluster-26447.159084,Cluster-26447.114984
GO:0044003	modification by symbiont of host morphology or physiology	biological_process	0.48782	1	5	966	557	126097	Cluster-26447.147095,Cluster-26447.82299,Cluster-26447.86266,Cluster-26447.33592,Cluster-26447.83472
GO:0043235	receptor complex	cellular_component	0.49087	1	1	966	74	126097	Cluster-31356.0
GO:0098802	plasma membrane receptor complex	cellular_component	0.49087	1	1	966	74	126097	Cluster-31356.0
GO:0042440	pigment metabolic process	biological_process	0.49097	1	6	966	717	126097	Cluster-26447.123064,Cluster-26447.91564,Cluster-26447.83904,Cluster-26447.91562,Cluster-26447.70648,Cluster-26447.112768
GO:0006614	SRP-dependent cotranslational protein targeting to membrane	biological_process	0.49141	1	4	966	443	126097	Cluster-26447.65687,Cluster-26447.125274,Cluster-26447.184313,Cluster-26447.120306
GO:0045047	protein targeting to ER	biological_process	0.49141	1	4	966	443	126097	Cluster-26447.184313,Cluster-26447.120306,Cluster-26447.65687,Cluster-26447.125274
GO:0072599	establishment of protein localization to endoplasmic reticulum	biological_process	0.49141	1	4	966	443	126097	Cluster-26447.65687,Cluster-26447.125274,Cluster-26447.184313,Cluster-26447.120306
GO:0010556	regulation of macromolecule biosynthetic process	biological_process	0.49164	1	94	966	11560	126097	Cluster-26447.147095,Cluster-26447.105017,Cluster-26447.114984,Cluster-26447.26494,Cluster-26447.143611,Cluster-26447.164716,Cluster-26447.123519,Cluster-26447.13031,Cluster-748.0,Cluster-26447.133826,Cluster-26447.75195,Cluster-26447.190563,Cluster-26447.160578,Cluster-26447.94858,Cluster-26447.155828,Cluster-26447.142960,Cluster-26447.111366,Cluster-26447.87879,Cluster-26447.113291,Cluster-2644…
GO:0031326	regulation of cellular biosynthetic process	biological_process	0.49164	1	94	966	11560	126097	Cluster-26447.125048,Cluster-26447.75347,Cluster-26447.10459,Cluster-26447.205876,Cluster-26447.22945,Cluster-26447.99827,Cluster-26447.27742,Cluster-26447.87881,Cluster-26447.94856,Cluster-26447.147946,Cluster-26447.84191,Cluster-26447.46077,Cluster-26447.60056,Cluster-26447.52943,Cluster-26447.133824,Cluster-26447.163880,Cluster-26447.168299,Cluster-26447.38965,Cluster-26447.135888,Cluster-2644…
GO:0044431	Golgi apparatus part	cellular_component	0.49184	1	6	966	616	126097	Cluster-26447.84191,Cluster-26447.152478,Cluster-26447.48978,Cluster-26447.13906,Cluster-26447.43676,Cluster-26447.107986
GO:0005247	voltage-gated chloride channel activity	molecular_function	0.49295	1	1	966	70	126097	Cluster-30803.0
GO:0005254	chloride channel activity	molecular_function	0.49295	1	1	966	70	126097	Cluster-30803.0
GO:0008308	voltage-gated anion channel activity	molecular_function	0.49295	1	1	966	70	126097	Cluster-30803.0
GO:0015108	chloride transmembrane transporter activity	molecular_function	0.49295	1	1	966	70	126097	Cluster-30803.0
GO:0002682	regulation of immune system process	biological_process	0.49305	1	3	966	336	126097	Cluster-26447.164902,Cluster-26447.204930,Cluster-26447.212720
GO:0042127	regulation of cell proliferation	biological_process	0.49383	1	1	966	83	126097	Cluster-26447.163186
GO:0050151	oleate hydratase activity	molecular_function	0.49404	1	1	966	74	126097	Cluster-26447.123064
GO:0010468	regulation of gene expression	biological_process	0.49477	1	96	966	11802	126097	Cluster-26447.135888,Cluster-26447.38965,Cluster-26447.168299,Cluster-26447.163880,Cluster-26447.159650,Cluster-26447.4592,Cluster-26447.118198,Cluster-26447.127538,Cluster-26447.122713,Cluster-26447.81217,Cluster-26447.120301,Cluster-26447.10814,Cluster-26447.22945,Cluster-26447.99827,Cluster-26447.205876,Cluster-26447.10459,Cluster-26447.125048,Cluster-26447.75347,Cluster-26447.133824,Cluster-2…
GO:0030176	integral component of endoplasmic reticulum membrane	cellular_component	0.49492	1	3	966	331	126097	Cluster-26447.209390,Cluster-26447.17376,Cluster-26447.121926
GO:0031227	intrinsic component of endoplasmic reticulum membrane	cellular_component	0.49492	1	3	966	331	126097	Cluster-26447.121926,Cluster-26447.209390,Cluster-26447.17376
GO:0031400	negative regulation of protein modification process	biological_process	0.49551	1	2	966	186	126097	Cluster-26447.99213,Cluster-26447.114984
GO:0051348	negative regulation of transferase activity	biological_process	0.49551	1	2	966	186	126097	Cluster-26447.114984,Cluster-26447.99213
GO:0007093	mitotic cell cycle checkpoint	biological_process	0.49627	1	2	966	186	126097	Cluster-26447.99213,Cluster-26447.114984
GO:0072522	purine-containing compound biosynthetic process	biological_process	0.49758	1	7	966	863	126097	Cluster-26447.120543,Cluster-26447.85633,Cluster-26447.118735,Cluster-26447.10934,Cluster-26447.102199,Cluster-26447.69821,Cluster-26447.10933
GO:0048519	negative regulation of biological process	biological_process	0.49774	1	12	966	1406	126097	Cluster-26447.114984,Cluster-26447.75058,Cluster-27210.2,Cluster-26447.10814,Cluster-27328.1,Cluster-26447.107804,Cluster-26447.99213,Cluster-26447.57455,Cluster-26447.63369,Cluster-26447.86266,Cluster-26447.211242,Cluster-26447.107816
GO:0004857	enzyme inhibitor activity	molecular_function	0.49798	1	7	966	814	126097	Cluster-26447.75058,Cluster-26447.53906,Cluster-26447.63369,Cluster-26447.130453,Cluster-26447.33592,Cluster-26447.74407,Cluster-26447.122456
GO:0009889	regulation of biosynthetic process	biological_process	0.49842	1	94	966	11581	126097	Cluster-26447.147946,Cluster-26447.46077,Cluster-26447.84191,Cluster-26447.94856,Cluster-26447.27742,Cluster-26447.87881,Cluster-26447.133824,Cluster-26447.60056,Cluster-26447.52943,Cluster-26447.75347,Cluster-26447.125048,Cluster-26447.10459,Cluster-26447.99827,Cluster-26447.22945,Cluster-26447.205876,Cluster-26447.120301,Cluster-26447.81217,Cluster-26447.118198,Cluster-26447.159650,Cluster-2644…
GO:0051817	modification of morphology or physiology of other organism involved in symbiotic interaction	biological_process	0.49952	1	5	966	564	126097	Cluster-26447.83472,Cluster-26447.33592,Cluster-26447.86266,Cluster-26447.147095,Cluster-26447.82299
GO:0072521	purine-containing compound metabolic process	biological_process	0.50045	1	37	966	4627	126097	Cluster-26447.204304,Cluster-26447.85633,Cluster-26447.205044,Cluster-26447.146706,Cluster-26447.190134,Cluster-26447.125593,Cluster-26447.99074,Cluster-26447.181772,Cluster-26447.84141,Cluster-26447.10621,Cluster-26447.96780,Cluster-26447.69821,Cluster-26447.113791,Cluster-26447.109344,Cluster-26447.140660,Cluster-26447.9447,Cluster-26447.10934,Cluster-26447.118735,Cluster-26447.203505,Cluster-2…
GO:0006400	tRNA modification	biological_process	0.50147	1	9	966	923	126097	Cluster-26447.125593,Cluster-26447.165528,Cluster-26447.190134,Cluster-26447.184313,Cluster-26447.58449,Cluster-26447.181385,Cluster-26447.37937,Cluster-9264.0,Cluster-26447.200976
GO:0032780	negative regulation of ATPase activity	biological_process	0.5024	1	1	966	90	126097	Cluster-26447.63369
GO:0051818	disruption of cells of other organism involved in symbiotic interaction	biological_process	0.50291	1	1	966	75	126097	Cluster-26447.83472
GO:0051883	killing of cells in other organism involved in symbiotic interaction	biological_process	0.50291	1	1	966	75	126097	Cluster-26447.83472
GO:0045930	negative regulation of mitotic cell cycle	biological_process	0.50305	1	2	966	190	126097	Cluster-26447.114984,Cluster-26447.99213
GO:0002684	positive regulation of immune system process	biological_process	0.50495	1	1	966	82	126097	Cluster-26447.164902
GO:0050778	positive regulation of immune response	biological_process	0.50495	1	1	966	82	126097	Cluster-26447.164902
GO:0007600	sensory perception	biological_process	0.50543	1	2	966	208	126097	Cluster-26447.44385,Cluster-26447.156997
GO:0050877	neurological system process	biological_process	0.50543	1	2	966	208	126097	Cluster-26447.44385,Cluster-26447.156997
GO:0007268	synaptic transmission	biological_process	0.50549	1	3	966	290	126097	Cluster-26447.102118,Cluster-26447.200669,Cluster-21685.4
GO:0005667	transcription factor complex	cellular_component	0.50617	1	46	966	5698	126097	Cluster-26447.130207,Cluster-26447.159386,Cluster-26447.73778,Cluster-26447.52385,Cluster-26447.132072,Cluster-26447.117062,Cluster-26447.117280,Cluster-26447.99213,Cluster-26447.93222,Cluster-26447.204182,Cluster-26447.46049,Cluster-26447.13725,Cluster-26447.207435,Cluster-26447.204304,Cluster-26447.205044,Cluster-26447.204617,Cluster-26447.146706,Cluster-26447.190134,Cluster-26447.204981,Cluste…
GO:0043130	ubiquitin binding	molecular_function	0.50791	1	1	966	82	126097	Cluster-26447.115609
GO:0070461	SAGA-type complex	cellular_component	0.50794	1	1	966	73	126097	Cluster-26447.117280
GO:0045095	keratin filament	cellular_component	0.50891	1	1	966	72	126097	Cluster-26447.30797
GO:0048038	quinone binding	molecular_function	0.50898	1	1	966	94	126097	Cluster-26447.100703
GO:0017038	protein import	biological_process	0.50922	1	6	966	673	126097	Cluster-26447.26715,Cluster-26447.55764,Cluster-26447.73778,Cluster-26447.107535,Cluster-20433.0,Cluster-26447.43983
GO:0051784	negative regulation of nuclear division	biological_process	0.50979	1	2	966	190	126097	Cluster-26447.99213,Cluster-26447.114984
GO:0010629	negative regulation of gene expression	biological_process	0.50982	1	4	966	435	126097	Cluster-26447.10814,Cluster-27328.1,Cluster-26447.107804,Cluster-26447.107816
GO:0015276	ligand-gated ion channel activity	molecular_function	0.51015	1	4	966	479	126097	Cluster-26447.102118,Cluster-26447.200669,Cluster-26447.182885,Cluster-26447.56531
GO:0022834	ligand-gated channel activity	molecular_function	0.51015	1	4	966	479	126097	Cluster-26447.200669,Cluster-26447.102118,Cluster-26447.182885,Cluster-26447.56531
GO:0005938	cell cortex	cellular_component	0.51155	1	5	966	525	126097	Cluster-26447.9136,Cluster-26447.84540,Cluster-26447.34800,Cluster-26447.118800,Cluster-26447.195148
GO:0046914	transition metal ion binding	molecular_function	0.51241	1	89	966	10484	126097	Cluster-26447.146841,Cluster-26447.110133,Cluster-26447.132894,Cluster-1340.1,Cluster-26447.70648,Cluster-26447.174995,Cluster-26447.204182,Cluster-26447.99074,Cluster-26447.205596,Cluster-26447.117280,Cluster-26447.204952,Cluster-26447.97798,Cluster-26447.131610,Cluster-26447.204734,Cluster-26447.163928,Cluster-26447.56410,Cluster-26447.203505,Cluster-26447.154204,Cluster-26447.24030,Cluster-264…
GO:0055082	cellular chemical homeostasis	biological_process	0.51304	1	3	966	397	126097	Cluster-26447.182885,Cluster-1202.1,Cluster-1202.0
GO:0000015	phosphopyruvate hydratase complex	cellular_component	0.51445	1	1	966	102	126097	Cluster-26447.108565
GO:0004634	phosphopyruvate hydratase activity	molecular_function	0.51445	1	1	966	102	126097	Cluster-26447.108565
GO:0006558	L-phenylalanine metabolic process	biological_process	0.5156	1	4	966	488	126097	Cluster-26447.8416,Cluster-26447.108565,Cluster-26447.98682,Cluster-26447.1470
GO:1902221	erythrose 4-phosphate/phosphoenolpyruvate family amino acid metabolic process	biological_process	0.5156	1	4	966	488	126097	Cluster-26447.8416,Cluster-26447.1470,Cluster-26447.98682,Cluster-26447.108565
GO:0006807	nitrogen compound metabolic process	biological_process	0.51563	1	305	966	37966	126097	Cluster-26447.84191,Cluster-26447.1433,Cluster-26447.94856,Cluster-26447.199694,Cluster-26447.52943,Cluster-26447.98682,Cluster-26447.10459,Cluster-26447.103544,Cluster-26447.22945,Cluster-26447.724,Cluster-26447.4592,Cluster-26447.118198,Cluster-26447.155056,Cluster-26447.12834,Cluster-26447.181385,Cluster-26447.205592,Cluster-26447.74891,Cluster-26447.169437,Cluster-26447.166722,Cluster-26447.2…
GO:0016877	ligase activity, forming carbon-sulfur bonds	molecular_function	0.51569	1	2	966	213	126097	Cluster-26447.724,Cluster-26447.110123
GO:0044179	hemolysis in other organism	biological_process	0.51631	1	1	966	79	126097	Cluster-26447.83472
GO:0033644	host cell membrane	cellular_component	0.51779	1	2	966	195	126097	Cluster-26447.61385,Cluster-26447.101528
GO:0009405	pathogenesis	biological_process	0.51785	1	18	966	2070	126097	Cluster-26447.200976,Cluster-26447.101528,Cluster-26447.204812,Cluster-26447.83904,Cluster-26447.48425,Cluster-26447.106238,Cluster-26447.48424,Cluster-26447.84540,Cluster-26447.131610,Cluster-26447.59093,Cluster-26447.3892,Cluster-26447.205218,Cluster-342.0,Cluster-26447.109529,Cluster-26447.102199,Cluster-26447.216685,Cluster-26447.45997,Cluster-26447.122810
GO:0004674	protein serine/threonine kinase activity	molecular_function	0.51855	1	8	966	867	126097	Cluster-26447.205592,Cluster-26447.201669,Cluster-26447.11275,Cluster-26447.11482,Cluster-26447.1432,Cluster-26447.1434,Cluster-26447.205596,Cluster-26447.1433
GO:0016796	exonuclease activity, active with either ribo- or deoxyribonucleic acids and producing 5'-phosphomonoesters	molecular_function	0.51857	1	4	966	435	126097	Cluster-26447.207435,Cluster-26447.119064,Cluster-26447.114984,Cluster-26447.132750
GO:0004879	RNA polymerase II transcription factor activity, ligand-activated sequence-specific DNA binding	molecular_function	0.52043	1	1	966	91	126097	Cluster-26447.52943
GO:0004882	androgen receptor activity	molecular_function	0.52043	1	1	966	91	126097	Cluster-26447.52943
GO:0030521	androgen receptor signaling pathway	biological_process	0.52043	1	1	966	91	126097	Cluster-26447.52943
GO:0098531	transcription factor activity, direct ligand regulated sequence-specific DNA binding	molecular_function	0.52043	1	1	966	91	126097	Cluster-26447.52943
GO:0009247	glycolipid biosynthetic process	biological_process	0.52182	1	4	966	444	126097	Cluster-26447.121272,Cluster-26447.28828,Cluster-26447.99255,Cluster-26447.90686
GO:0046467	membrane lipid biosynthetic process	biological_process	0.52182	1	4	966	444	126097	Cluster-26447.99255,Cluster-26447.121272,Cluster-26447.28828,Cluster-26447.90686
GO:0048523	negative regulation of cellular process	biological_process	0.52236	1	9	966	1061	126097	Cluster-26447.57455,Cluster-26447.99213,Cluster-26447.86266,Cluster-26447.107816,Cluster-26447.211242,Cluster-27210.2,Cluster-26447.114984,Cluster-26447.75058,Cluster-26447.107804
GO:0004529	exodeoxyribonuclease activity	molecular_function	0.52266	1	3	966	333	126097	Cluster-26447.207435,Cluster-26447.114984,Cluster-26447.132750
GO:0016895	exodeoxyribonuclease activity, producing 5'-phosphomonoesters	molecular_function	0.52266	1	3	966	333	126097	Cluster-26447.207435,Cluster-26447.114984,Cluster-26447.132750
GO:0015994	chlorophyll metabolic process	biological_process	0.52274	1	4	966	477	126097	Cluster-26447.102068,Cluster-26447.91562,Cluster-26447.83904,Cluster-26447.91564
GO:0005451	monovalent cation:proton antiporter activity	molecular_function	0.52301	1	1	966	85	126097	Cluster-26447.182885
GO:0015491	cation:cation antiporter activity	molecular_function	0.52301	1	1	966	85	126097	Cluster-26447.182885
GO:0009360	DNA polymerase III complex	cellular_component	0.52303	1	1	966	86	126097	Cluster-26447.115132
GO:0016831	carboxy-lyase activity	molecular_function	0.52426	1	6	966	707	126097	Cluster-26447.69158,Cluster-26447.1470,Cluster-26447.98682,Cluster-26447.216733,Cluster-26447.8416,Cluster-26447.149113
GO:0080134	regulation of response to stress	biological_process	0.5253	1	2	966	226	126097	Cluster-26447.212720,Cluster-26447.142512
GO:0018208	peptidyl-proline modification	biological_process	0.526	1	2	966	240	126097	Cluster-26447.74527,Cluster-26447.100558
GO:0005253	anion channel activity	molecular_function	0.52654	1	1	966	83	126097	Cluster-30803.0
GO:0044699	single-organism process	biological_process	0.52699	1	417	966	51532	126097	Cluster-26447.125074,Cluster-26447.46051,Cluster-26447.86266,Cluster-26447.64869,Cluster-26447.173983,Cluster-26447.118364,Cluster-26447.167194,Cluster-26447.82999,Cluster-26447.56531,Cluster-26447.203494,Cluster-26447.176499,Cluster-26447.142960,Cluster-26447.109788,Cluster-26447.171743,Cluster-21685.4,Cluster-26447.564,Cluster-26447.105025,Cluster-26447.180072,Cluster-26447.85601,Cluster-26447.…
GO:0016972	thiol oxidase activity	molecular_function	0.52714	1	1	966	93	126097	Cluster-26447.45949
GO:0006928	movement of cell or subcellular component	biological_process	0.52737	1	8	966	936	126097	Cluster-26447.208563,Cluster-26447.147946,Cluster-26447.53497,Cluster-26447.216685,Cluster-26447.197869,Cluster-26447.197252,Cluster-26447.73778,Cluster-26447.135888
GO:0072329	monocarboxylic acid catabolic process	biological_process	0.52748	1	1	966	73	126097	Cluster-26447.135732
GO:0030695	GTPase regulator activity	molecular_function	0.52853	1	4	966	419	126097	Cluster-26447.120607,Cluster-26447.68826,Cluster-26447.32109,Cluster-26447.160775
GO:0044707	single-multicellular organism process	biological_process	0.52866	1	19	966	2255	126097	Cluster-26447.156997,Cluster-26447.20884,Cluster-26447.181330,Cluster-27210.2,Cluster-26447.173511,Cluster-26447.564,Cluster-26447.46049,Cluster-26447.208563,Cluster-26447.46051,Cluster-26447.44385,Cluster-26447.123882,Cluster-26447.50022,Cluster-26447.65262,Cluster-26447.75058,Cluster-26447.9136,Cluster-26447.191579,Cluster-26447.216685,Cluster-26447.111493,Cluster-26447.181705
GO:0007267	cell-cell signaling	biological_process	0.52884	1	3	966	298	126097	Cluster-21685.4,Cluster-26447.200669,Cluster-26447.102118
GO:0032801	receptor catabolic process	biological_process	0.5301	1	1	966	86	126097	Cluster-26447.61385
GO:0036442	hydrogen-exporting ATPase activity	molecular_function	0.53019	1	1	966	92	126097	Cluster-26447.120543
GO:0046961	proton-transporting ATPase activity, rotational mechanism	molecular_function	0.53019	1	1	966	92	126097	Cluster-26447.120543
GO:0016459	myosin complex	cellular_component	0.53059	1	2	966	192	126097	Cluster-26447.190134,Cluster-26447.34800
GO:0034655	nucleobase-containing compound catabolic process	biological_process	0.53092	1	8	966	924	126097	Cluster-26447.132750,Cluster-26447.26693,Cluster-26447.212926,Cluster-26447.107555,Cluster-26447.207435,Cluster-26447.162631,Cluster-26447.69821,Cluster-26447.114984
GO:0006739	NADP metabolic process	biological_process	0.531	1	7	966	914	126097	Cluster-26447.153858,Cluster-26447.60729,Cluster-26447.724,Cluster-26447.109407,Cluster-26447.148200,Cluster-26447.109344,Cluster-26447.109452
GO:0042995	cell projection	cellular_component	0.5312	1	5	966	588	126097	Cluster-26447.135888,Cluster-26447.73778,Cluster-26447.53497,Cluster-26447.114984,Cluster-26447.147946
GO:0043623	cellular protein complex assembly	biological_process	0.53191	1	12	966	1396	126097	Cluster-26447.93149,Cluster-26447.131610,Cluster-26447.181330,Cluster-26447.20884,Cluster-26447.13697,Cluster-26447.179322,Cluster-26447.34800,Cluster-1298.0,Cluster-26447.109529,Cluster-26447.46051,Cluster-26447.44224,Cluster-26447.46049
GO:0016782	transferase activity, transferring sulfur-containing groups	molecular_function	0.53199	1	1	966	111	126097	Cluster-26447.206523
GO:0004519	endonuclease activity	molecular_function	0.53228	1	9	966	1048	126097	Cluster-26447.95481,Cluster-26447.68348,Cluster-26447.69821,Cluster-26447.110133,Cluster-26447.212926,Cluster-26447.174995,Cluster-26447.107555,Cluster-26447.165515,Cluster-26447.158601
GO:0042773	ATP synthesis coupled electron transport	biological_process	0.53281	1	6	966	714	126097	Cluster-26447.181385,Cluster-26447.84141,Cluster-26447.99074,Cluster-26447.99447,Cluster-26447.96780,Cluster-26447.37937
GO:0010466	negative regulation of peptidase activity	biological_process	0.53512	1	1	966	81	126097	Cluster-26447.75058
GO:0010951	negative regulation of endopeptidase activity	biological_process	0.53512	1	1	966	81	126097	Cluster-26447.75058
GO:0004518	nuclease activity	molecular_function	0.53602	1	17	966	1968	126097	Cluster-26447.165515,Cluster-26447.107555,Cluster-26447.207435,Cluster-26447.174995,Cluster-26447.110133,Cluster-26447.124429,Cluster-26447.119064,Cluster-26447.95481,Cluster-26447.58690,Cluster-26447.69821,Cluster-26447.135089,Cluster-26447.158601,Cluster-26447.132750,Cluster-26447.212926,Cluster-26447.3666,Cluster-26447.114984,Cluster-26447.68348
GO:0006275	regulation of DNA replication	biological_process	0.537	1	1	966	97	126097	Cluster-26447.46077
GO:0051171	regulation of nitrogen compound metabolic process	biological_process	0.53933	1	98	966	12149	126097	Cluster-26447.40614,Cluster-26447.132072,Cluster-26447.159813,Cluster-26447.147331,Cluster-26447.103862,Cluster-26447.190134,Cluster-26447.117280,Cluster-26447.195148,Cluster-26447.204182,Cluster-26447.13725,Cluster-26447.72759,Cluster-26447.111620,Cluster-26447.204981,Cluster-26447.185243,Cluster-26447.119099,Cluster-26447.184313,Cluster-26447.180526,Cluster-26447.122732,Cluster-26447.119064,Clu…
GO:0015298	solute:cation antiporter activity	molecular_function	0.54004	1	2	966	211	126097	Cluster-26447.182885,Cluster-26447.105501
GO:0015299	solute:proton antiporter activity	molecular_function	0.54004	1	2	966	211	126097	Cluster-26447.182885,Cluster-26447.105501
GO:0000090	mitotic anaphase	biological_process	0.54103	1	1	966	85	126097	Cluster-26447.34800
GO:0051322	anaphase	biological_process	0.54103	1	1	966	85	126097	Cluster-26447.34800
GO:0006576	cellular biogenic amine metabolic process	biological_process	0.54187	1	9	966	1136	126097	Cluster-26447.724,Cluster-26447.127427,Cluster-26447.97817,Cluster-26447.98682,Cluster-26447.9847,Cluster-26447.8416,Cluster-26447.1470,Cluster-26447.108565,Cluster-26447.112768
GO:0044106	cellular amine metabolic process	biological_process	0.54187	1	9	966	1136	126097	Cluster-26447.98682,Cluster-26447.97817,Cluster-26447.724,Cluster-26447.127427,Cluster-26447.108565,Cluster-26447.112768,Cluster-26447.1470,Cluster-26447.9847,Cluster-26447.8416
GO:0044459	plasma membrane part	cellular_component	0.54219	1	13	966	1497	126097	Cluster-26447.79081,Cluster-26447.114501,Cluster-26447.94903,Cluster-26447.66517,Cluster-26447.107804,Cluster-26447.22371,Cluster-26447.85635,Cluster-26447.65167,Cluster-26447.118335,Cluster-31356.0,Cluster-26447.107818,Cluster-26447.66120,Cluster-26447.56531
GO:0055065	metal ion homeostasis	biological_process	0.54233	1	3	966	406	126097	Cluster-1202.0,Cluster-1202.1,Cluster-26447.182885
GO:0007167	enzyme linked receptor protein signaling pathway	biological_process	0.54242	1	1	966	106	126097	Cluster-26447.211242
GO:0019239	deaminase activity	molecular_function	0.54245	1	1	966	77	126097	Cluster-26447.162631
GO:0006563	L-serine metabolic process	biological_process	0.54267	1	2	966	185	126097	Cluster-26447.46051,Cluster-26447.46049
GO:0046655	folic acid metabolic process	biological_process	0.54409	1	2	966	198	126097	Cluster-26447.113672,Cluster-26447.58690
GO:0046656	folic acid biosynthetic process	biological_process	0.54409	1	2	966	198	126097	Cluster-26447.58690,Cluster-26447.113672
GO:0006525	arginine metabolic process	biological_process	0.5446	1	3	966	358	126097	Cluster-26447.146217,Cluster-26447.113937,Cluster-26447.48824
GO:0008175	tRNA methyltransferase activity	molecular_function	0.54486	1	3	966	308	126097	Cluster-26447.57410,Cluster-26447.125593,Cluster-26447.75347
GO:0009451	RNA modification	biological_process	0.54497	1	14	966	1580	126097	Cluster-26447.125593,Cluster-26447.57410,Cluster-26447.173016,Cluster-26447.165528,Cluster-26447.190134,Cluster-26447.184313,Cluster-26447.58449,Cluster-26447.181385,Cluster-26447.75347,Cluster-9264.0,Cluster-26447.48330,Cluster-26447.200976,Cluster-26447.48334,Cluster-26447.37937
GO:0005819	spindle	cellular_component	0.54498	1	5	966	552	126097	Cluster-26447.184773,Cluster-26447.135888,Cluster-26447.34800,Cluster-26447.184774,Cluster-26447.44224
GO:0030170	pyridoxal phosphate binding	molecular_function	0.54542	1	5	966	627	126097	Cluster-26447.145625,Cluster-26447.149113,Cluster-26447.63369,Cluster-26447.128951,Cluster-26447.125048
GO:0006629	lipid metabolic process	biological_process	0.54547	1	42	966	5120	126097	Cluster-26447.153114,Cluster-26447.55740,Cluster-26447.724,Cluster-26447.169437,Cluster-26447.171743,Cluster-26447.204570,Cluster-26447.98682,Cluster-26447.112697,Cluster-26447.26018,Cluster-26447.21121,Cluster-26447.86326,Cluster-8641.3,Cluster-26447.90686,Cluster-26447.99255,Cluster-26447.57664,Cluster-26447.167496,Cluster-26447.67834,Cluster-26447.112768,Cluster-26447.103544,Cluster-26447.1390…
GO:0098519	nucleotide phosphatase activity, acting on free nucleotides	molecular_function	0.54602	1	3	966	341	126097	Cluster-9264.0,Cluster-26447.159125,Cluster-26447.120306
GO:0030337	DNA polymerase processivity factor activity	molecular_function	0.54666	1	2	966	223	126097	Cluster-26447.122456,Cluster-26447.216958
GO:0008137	NADH dehydrogenase (ubiquinone) activity	molecular_function	0.54726	1	2	966	235	126097	Cluster-26447.84141,Cluster-26447.99447
GO:0050136	NADH dehydrogenase (quinone) activity	molecular_function	0.54726	1	2	966	235	126097	Cluster-26447.99447,Cluster-26447.84141
GO:0016010	dystrophin-associated glycoprotein complex	cellular_component	0.54739	1	1	966	94	126097	Cluster-26447.65167
GO:0006364	rRNA processing	biological_process	0.54767	1	6	966	730	126097	Cluster-26447.48334,Cluster-26447.33687,Cluster-26447.48330,Cluster-26447.123519,Cluster-26447.125593,Cluster-26447.53906
GO:0016072	rRNA metabolic process	biological_process	0.54767	1	6	966	730	126097	Cluster-26447.123519,Cluster-26447.48334,Cluster-26447.33687,Cluster-26447.48330,Cluster-26447.53906,Cluster-26447.125593
GO:1901615	organic hydroxy compound metabolic process	biological_process	0.54833	1	5	966	674	126097	Cluster-26447.70648,Cluster-26447.197288,Cluster-26447.98682,Cluster-26447.155828,Cluster-26447.115578
GO:0044270	cellular nitrogen compound catabolic process	biological_process	0.55007	1	10	966	1202	126097	Cluster-26447.114984,Cluster-26447.69821,Cluster-26447.26693,Cluster-26447.212926,Cluster-26447.132750,Cluster-26447.91564,Cluster-26447.207435,Cluster-26447.107555,Cluster-26447.162631,Cluster-26447.91562
GO:0015293	symporter activity	molecular_function	0.55013	1	2	966	203	126097	Cluster-26447.158601,Cluster-26447.152478
GO:0015294	solute:cation symporter activity	molecular_function	0.55013	1	2	966	203	126097	Cluster-26447.158601,Cluster-26447.152478
GO:0044764	multi-organism cellular process	biological_process	0.5506	1	29	966	3479	126097	Cluster-26447.216958,Cluster-26447.86266,Cluster-26447.111580,Cluster-26447.54173,Cluster-26447.61385,Cluster-26447.12834,Cluster-26447.179565,Cluster-26447.164857,Cluster-26447.197252,Cluster-26447.48974,Cluster-26447.208164,Cluster-26447.82299,Cluster-26447.169437,Cluster-26447.122456,Cluster-26447.48975,Cluster-26447.157586,Cluster-26447.55901,Cluster-26447.122732,Cluster-26447.111493,Cluster-…
GO:0034622	cellular macromolecular complex assembly	biological_process	0.55313	1	14	966	1704	126097	Cluster-26447.34800,Cluster-26447.179322,Cluster-1298.0,Cluster-26447.109529,Cluster-26447.156505,Cluster-26447.46051,Cluster-26447.44224,Cluster-26447.46049,Cluster-26447.93149,Cluster-26447.181330,Cluster-26447.131610,Cluster-26447.20884,Cluster-26447.156490,Cluster-26447.13697
GO:0038023	signaling receptor activity	molecular_function	0.55402	1	10	966	1162	126097	Cluster-26447.102118,Cluster-26447.79310,Cluster-26447.56531,Cluster-26447.44385,Cluster-26447.52943,Cluster-26447.137118,Cluster-26447.33127,Cluster-26447.200669,Cluster-26447.156997,Cluster-26447.2402
GO:0005179	hormone activity	molecular_function	0.55447	1	6	966	739	126097	Cluster-26447.46051,Cluster-12330.0,Cluster-26447.46049,Cluster-26447.175970,Cluster-26447.84716,Cluster-26447.99448
GO:0035821	modification of morphology or physiology of other organism	biological_process	0.55555	1	5	966	602	126097	Cluster-26447.86266,Cluster-26447.33592,Cluster-26447.83472,Cluster-26447.82299,Cluster-26447.147095
GO:0019028	viral capsid	cellular_component	0.5565	1	17	966	2071	126097	Cluster-26447.48974,Cluster-26447.73778,Cluster-26447.82299,Cluster-26447.127712,Cluster-26447.48975,Cluster-26447.8177,Cluster-26447.216428,Cluster-26447.48972,Cluster-26447.130688,Cluster-26447.10933,Cluster-26447.10934,Cluster-26447.127700,Cluster-26447.87881,Cluster-26447.173016,Cluster-26447.146217,Cluster-26447.184313,Cluster-26447.42727
GO:0008509	anion transmembrane transporter activity	molecular_function	0.55806	1	6	966	693	126097	Cluster-26447.58259,Cluster-26447.119868,Cluster-26447.158601,Cluster-26447.149497,Cluster-26447.166736,Cluster-30803.0
GO:0004536	deoxyribonuclease activity	molecular_function	0.55896	1	6	966	697	126097	Cluster-26447.107555,Cluster-26447.207435,Cluster-26447.132750,Cluster-26447.69821,Cluster-26447.212926,Cluster-26447.114984
GO:0051715	cytolysis in other organism	biological_process	0.56075	1	1	966	89	126097	Cluster-26447.83472
GO:0006575	cellular modified amino acid metabolic process	biological_process	0.56116	1	11	966	1370	126097	Cluster-26447.109452,Cluster-26447.118364,Cluster-26447.724,Cluster-26447.118735,Cluster-26447.125593,Cluster-26447.113672,Cluster-26447.84696,Cluster-26447.60729,Cluster-26447.12358,Cluster-26447.123640,Cluster-26447.58690
GO:0016725	oxidoreductase activity, acting on CH or CH2 groups	molecular_function	0.56133	1	1	966	91	126097	Cluster-26447.107517
GO:0019867	outer membrane	cellular_component	0.56175	1	9	966	1059	126097	Cluster-20433.0,Cluster-26447.107535,Cluster-26447.166844,Cluster-26447.52943,Cluster-26447.12299,Cluster-26447.43983,Cluster-26447.111580,Cluster-26447.91395,Cluster-26447.84696
GO:0009847	spore germination	biological_process	0.56286	1	1	966	97	126097	Cluster-26447.99213
GO:0050290	sphingomyelin phosphodiesterase D activity	molecular_function	0.56302	1	1	966	66	126097	Cluster-26447.41274
GO:0034457	Mpp10 complex	cellular_component	0.56402	1	1	966	104	126097	Cluster-26447.53906
GO:0006520	cellular amino acid metabolic process	biological_process	0.56454	1	45	966	5446	126097	Cluster-26447.48824,Cluster-26447.88622,Cluster-26447.185243,Cluster-26447.12358,Cluster-26447.209963,Cluster-26447.97680,Cluster-26447.140660,Cluster-26447.63553,Cluster-26447.181705,Cluster-26447.164902,Cluster-26447.1432,Cluster-26447.187623,Cluster-26447.146217,Cluster-26447.9847,Cluster-26447.113791,Cluster-26447.200422,Cluster-26447.113672,Cluster-26447.11275,Cluster-26447.205596,Cluster-26…
GO:0009081	branched-chain amino acid metabolic process	biological_process	0.56492	1	5	966	593	126097	Cluster-26447.724,Cluster-26447.9847,Cluster-26447.98682,Cluster-26447.207435,Cluster-26447.112768
GO:0009308	amine metabolic process	biological_process	0.56527	1	10	966	1275	126097	Cluster-26447.9847,Cluster-26447.8416,Cluster-26447.1470,Cluster-26447.100703,Cluster-26447.108565,Cluster-26447.112768,Cluster-26447.127427,Cluster-26447.724,Cluster-26447.97817,Cluster-26447.98682
GO:0030686	90S preribosome	cellular_component	0.56532	1	1	966	105	126097	Cluster-26447.53906
GO:0042803	protein homodimerization activity	molecular_function	0.56577	1	4	966	458	126097	Cluster-26447.135888,Cluster-26447.73778,Cluster-26447.46051,Cluster-26447.46049
GO:0030154	cell differentiation	biological_process	0.5669	1	6	966	753	126097	Cluster-26447.9136,Cluster-26447.173016,Cluster-26447.208563,Cluster-26447.166543,Cluster-26447.173511,Cluster-26447.216685
GO:0019693	ribose phosphate metabolic process	biological_process	0.56724	1	25	966	3278	126097	Cluster-26447.102199,Cluster-26447.10933,Cluster-26447.118735,Cluster-26447.10934,Cluster-26447.120543,Cluster-26447.109344,Cluster-26447.165528,Cluster-26447.109407,Cluster-26447.75347,Cluster-26447.60729,Cluster-26447.99447,Cluster-26447.204182,Cluster-26447.99074,Cluster-26447.153858,Cluster-26447.724,Cluster-26447.84141,Cluster-26447.148200,Cluster-26447.85633,Cluster-26447.109452,Cluster-264…
GO:0004523	RNA-DNA hybrid ribonuclease activity	molecular_function	0.56736	1	1	966	90	126097	Cluster-26447.68348
GO:0070569	uridylyltransferase activity	molecular_function	0.56812	1	1	966	110	126097	Cluster-26447.123519
GO:0031109	microtubule polymerization or depolymerization	biological_process	0.56834	1	2	966	215	126097	Cluster-26447.44224,Cluster-26447.34800
GO:0031110	regulation of microtubule polymerization or depolymerization	biological_process	0.56834	1	2	966	215	126097	Cluster-26447.34800,Cluster-26447.44224
GO:0006935	chemotaxis	biological_process	0.56843	1	2	966	243	126097	Cluster-26447.208563,Cluster-26447.216685
GO:0016814	hydrolase activity, acting on carbon-nitrogen (but not peptide) bonds, in cyclic amidines	molecular_function	0.56858	1	1	966	97	126097	Cluster-26447.162631
GO:1902911	protein kinase complex	cellular_component	0.56861	1	4	966	443	126097	Cluster-26447.137118,Cluster-26447.48424,Cluster-26447.79310,Cluster-26447.48425
GO:0019048	modulation by virus of host morphology or physiology	biological_process	0.56933	1	4	966	494	126097	Cluster-26447.82299,Cluster-26447.147095,Cluster-26447.86266,Cluster-26447.33592
GO:0008094	DNA-dependent ATPase activity	molecular_function	0.56963	1	3	966	308	126097	Cluster-26447.120306,Cluster-26447.28276,Cluster-26447.58449
GO:0006032	chitin catabolic process	biological_process	0.56968	1	1	966	97	126097	Cluster-26447.160578
GO:0046348	amino sugar catabolic process	biological_process	0.56968	1	1	966	97	126097	Cluster-26447.160578
GO:1901072	glucosamine-containing compound catabolic process	biological_process	0.56968	1	1	966	97	126097	Cluster-26447.160578
GO:0016829	lyase activity	molecular_function	0.57138	1	21	966	2683	126097	Cluster-26447.206703,Cluster-26447.103544,Cluster-26447.99827,Cluster-26447.102199,Cluster-26447.123064,Cluster-26447.110206,Cluster-26447.69158,Cluster-26447.98682,Cluster-26447.83904,Cluster-26447.8416,Cluster-26447.69821,Cluster-26447.42104,Cluster-26447.206705,Cluster-26447.169437,Cluster-26447.108565,Cluster-26447.1470,Cluster-26447.149113,Cluster-26447.63369,Cluster-26447.85633,Cluster-2644…
GO:0008242	omega peptidase activity	molecular_function	0.57151	1	1	966	99	126097	Cluster-26447.124528
GO:0016634	oxidoreductase activity, acting on the CH-CH group of donors, oxygen as acceptor	molecular_function	0.57217	1	1	966	89	126097	Cluster-26447.135732
GO:0007091	metaphase/anaphase transition of mitotic cell cycle	biological_process	0.57279	1	2	966	206	126097	Cluster-26447.99213,Cluster-26447.114984
GO:0010965	regulation of mitotic sister chromatid separation	biological_process	0.57279	1	2	966	206	126097	Cluster-26447.99213,Cluster-26447.114984
GO:0030071	regulation of mitotic metaphase/anaphase transition	biological_process	0.57279	1	2	966	206	126097	Cluster-26447.114984,Cluster-26447.99213
GO:0031145	anaphase-promoting complex-dependent proteasomal ubiquitin-dependent protein catabolic process	biological_process	0.57279	1	2	966	206	126097	Cluster-26447.114984,Cluster-26447.99213
GO:0032434	regulation of proteasomal ubiquitin-dependent protein catabolic process	biological_process	0.57279	1	2	966	206	126097	Cluster-26447.99213,Cluster-26447.114984
GO:0033044	regulation of chromosome organization	biological_process	0.57279	1	2	966	206	126097	Cluster-26447.114984,Cluster-26447.99213
GO:0033045	regulation of sister chromatid segregation	biological_process	0.57279	1	2	966	206	126097	Cluster-26447.114984,Cluster-26447.99213
GO:0033047	regulation of mitotic sister chromatid segregation	biological_process	0.57279	1	2	966	206	126097	Cluster-26447.114984,Cluster-26447.99213
GO:0044784	metaphase/anaphase transition of cell cycle	biological_process	0.57279	1	2	966	206	126097	Cluster-26447.99213,Cluster-26447.114984
GO:0051306	mitotic sister chromatid separation	biological_process	0.57279	1	2	966	206	126097	Cluster-26447.114984,Cluster-26447.99213
GO:0051983	regulation of chromosome segregation	biological_process	0.57279	1	2	966	206	126097	Cluster-26447.114984,Cluster-26447.99213
GO:1902099	regulation of metaphase/anaphase transition of cell cycle	biological_process	0.57279	1	2	966	206	126097	Cluster-26447.114984,Cluster-26447.99213
GO:0071310	cellular response to organic substance	biological_process	0.57293	1	1	966	97	126097	Cluster-26447.211242
GO:0000774	adenyl-nucleotide exchange factor activity	molecular_function	0.57349	1	1	966	120	126097	Cluster-26447.135888
GO:0006730	one-carbon metabolic process	biological_process	0.57378	1	1	966	117	126097	Cluster-26447.110206
GO:0045202	synapse	cellular_component	0.57412	1	1	966	91	126097	Cluster-26447.194577
GO:1902531	regulation of intracellular signal transduction	biological_process	0.57473	1	2	966	234	126097	Cluster-26447.211242,Cluster-26447.204930
GO:0003954	NADH dehydrogenase activity	molecular_function	0.57477	1	2	966	252	126097	Cluster-26447.99447,Cluster-26447.84141
GO:0000794	condensed nuclear chromosome	cellular_component	0.57481	1	3	966	349	126097	Cluster-26447.184773,Cluster-26447.135888,Cluster-26447.184774
GO:0009097	isoleucine biosynthetic process	biological_process	0.57537	1	1	966	89	126097	Cluster-26447.207435
GO:0009099	valine biosynthetic process	biological_process	0.57537	1	1	966	89	126097	Cluster-26447.207435
GO:0006568	tryptophan metabolic process	biological_process	0.57554	1	7	966	897	126097	Cluster-26447.8416,Cluster-26447.9847,Cluster-26447.724,Cluster-26447.112768,Cluster-26447.108565,Cluster-26447.98682,Cluster-26447.1470
GO:0006586	indolalkylamine metabolic process	biological_process	0.57554	1	7	966	897	126097	Cluster-26447.112768,Cluster-26447.108565,Cluster-26447.98682,Cluster-26447.1470,Cluster-26447.8416,Cluster-26447.9847,Cluster-26447.724
GO:0019901	protein kinase binding	molecular_function	0.57598	1	2	966	235	126097	Cluster-26447.99213,Cluster-26447.34800
GO:0032269	negative regulation of cellular protein metabolic process	biological_process	0.57854	1	3	966	331	126097	Cluster-26447.114984,Cluster-26447.99213,Cluster-26447.75058
GO:0051248	negative regulation of protein metabolic process	biological_process	0.57854	1	3	966	331	126097	Cluster-26447.99213,Cluster-26447.114984,Cluster-26447.75058
GO:0022900	electron transport chain	biological_process	0.57861	1	8	966	1017	126097	Cluster-26447.99074,Cluster-26447.84141,Cluster-4272.5,Cluster-26447.181385,Cluster-26447.91523,Cluster-26447.96780,Cluster-26447.37937,Cluster-26447.99447
GO:0009108	coenzyme biosynthetic process	biological_process	0.57996	1	12	966	1531	126097	Cluster-26447.96215,Cluster-26447.724,Cluster-26447.84141,Cluster-26447.118735,Cluster-26447.118364,Cluster-26447.98682,Cluster-26447.58690,Cluster-26447.12358,Cluster-26447.84696,Cluster-26447.113672,Cluster-26447.56410,Cluster-26447.99447
GO:0051304	chromosome separation	biological_process	0.57998	1	2	966	209	126097	Cluster-26447.114984,Cluster-26447.99213
GO:0005664	nuclear origin of replication recognition complex	cellular_component	0.58003	1	2	966	207	126097	Cluster-26447.48330,Cluster-26447.48334
GO:0051258	protein polymerization	biological_process	0.581	1	5	966	610	126097	Cluster-26447.20884,Cluster-26447.181330,Cluster-26447.46051,Cluster-26447.46049,Cluster-26447.44224
GO:0090150	establishment of protein localization to membrane	biological_process	0.581	1	6	966	754	126097	Cluster-26447.65687,Cluster-26447.125274,Cluster-26447.121926,Cluster-26447.43983,Cluster-26447.184313,Cluster-26447.120306
GO:0016670	oxidoreductase activity, acting on a sulfur group of donors, oxygen as acceptor	molecular_function	0.58157	1	1	966	106	126097	Cluster-26447.45949
GO:0007166	cell surface receptor signaling pathway	biological_process	0.58179	1	5	966	627	126097	Cluster-26447.35718,Cluster-26447.211242,Cluster-26447.164902,Cluster-26447.208563,Cluster-27210.2
GO:0008194	UDP-glycosyltransferase activity	molecular_function	0.58237	1	8	966	919	126097	Cluster-26447.121272,Cluster-26447.181533,Cluster-26447.107986,Cluster-26447.59916,Cluster-26447.38377,Cluster-26447.85635,Cluster-26447.99255,Cluster-26447.107804
GO:0060589	nucleoside-triphosphatase regulator activity	molecular_function	0.58244	1	6	966	738	126097	Cluster-26447.160775,Cluster-26447.63369,Cluster-26447.32109,Cluster-26447.135888,Cluster-26447.68826,Cluster-26447.120607
GO:0070972	protein localization to endoplasmic reticulum	biological_process	0.58271	1	4	966	496	126097	Cluster-26447.184313,Cluster-26447.120306,Cluster-26447.65687,Cluster-26447.125274
GO:0005126	cytokine receptor binding	molecular_function	0.58324	1	2	966	209	126097	Cluster-31356.0,Cluster-26447.163186
GO:0042398	cellular modified amino acid biosynthetic process	biological_process	0.58331	1	7	966	887	126097	Cluster-26447.58690,Cluster-26447.12358,Cluster-26447.724,Cluster-26447.118735,Cluster-26447.84696,Cluster-26447.113672,Cluster-26447.118364
GO:0090575	RNA polymerase II transcription factor complex	cellular_component	0.58372	1	3	966	354	126097	Cluster-26447.172340,Cluster-26447.58799,Cluster-26447.3666
GO:0005886	plasma membrane	cellular_component	0.58473	1	22	966	2763	126097	Cluster-26447.205040,Cluster-26447.66120,Cluster-26447.197774,Cluster-26447.35100,Cluster-26447.107818,Cluster-26447.130231,Cluster-26447.118335,Cluster-26447.85635,Cluster-26447.107804,Cluster-26447.22371,Cluster-26447.79081,Cluster-26447.94903,Cluster-26447.114501,Cluster-26447.77681,Cluster-26447.56531,Cluster-26447.175250,Cluster-26447.117301,Cluster-31356.0,Cluster-26447.65167,Cluster-26447.…
GO:0061136	regulation of proteasomal protein catabolic process	biological_process	0.58545	1	2	966	212	126097	Cluster-26447.99213,Cluster-26447.114984
GO:1903050	regulation of proteolysis involved in cellular protein catabolic process	biological_process	0.58545	1	2	966	212	126097	Cluster-26447.114984,Cluster-26447.99213
GO:1903362	regulation of cellular protein catabolic process	biological_process	0.58545	1	2	966	212	126097	Cluster-26447.99213,Cluster-26447.114984
GO:0004499	N,N-dimethylaniline monooxygenase activity	molecular_function	0.5861	1	1	966	101	126097	Cluster-26447.185494
GO:0030518	intracellular steroid hormone receptor signaling pathway	biological_process	0.58684	1	1	966	104	126097	Cluster-26447.52943
GO:0030522	intracellular receptor signaling pathway	biological_process	0.58684	1	1	966	104	126097	Cluster-26447.52943
GO:0006631	fatty acid metabolic process	biological_process	0.58728	1	8	966	1005	126097	Cluster-26447.9847,Cluster-26447.123640,Cluster-26447.135732,Cluster-26447.112768,Cluster-26447.123064,Cluster-26447.724,Cluster-26447.85633,Cluster-26447.98682
GO:0043233	organelle lumen	cellular_component	0.58763	1	29	966	3570	126097	Cluster-26447.127758,Cluster-26447.135875,Cluster-26447.40614,Cluster-26447.48330,Cluster-26447.135888,Cluster-26447.113791,Cluster-26447.107160,Cluster-26447.53906,Cluster-26447.48425,Cluster-26447.107986,Cluster-26447.204617,Cluster-26447.205044,Cluster-26447.204304,Cluster-26447.181772,Cluster-26447.184774,Cluster-26447.172340,Cluster-26447.141736,Cluster-26447.117280,Cluster-26447.48424,Clust…
GO:0070013	intracellular organelle lumen	cellular_component	0.58763	1	29	966	3570	126097	Cluster-26447.135888,Cluster-26447.48330,Cluster-26447.40614,Cluster-26447.135875,Cluster-26447.127758,Cluster-26447.48425,Cluster-26447.53906,Cluster-26447.107160,Cluster-26447.113791,Cluster-26447.204304,Cluster-26447.205044,Cluster-26447.204617,Cluster-26447.107986,Cluster-26447.141736,Cluster-26447.117280,Cluster-26447.172340,Cluster-26447.184774,Cluster-26447.181772,Cluster-26447.48334,Clust…
GO:0042330	taxis	biological_process	0.58819	1	2	966	250	126097	Cluster-26447.208563,Cluster-26447.216685
GO:0015079	potassium ion transmembrane transporter activity	molecular_function	0.58844	1	8	966	1016	126097	Cluster-26447.66120,Cluster-26447.207713,Cluster-26447.140126,Cluster-26447.11686,Cluster-26447.164912,Cluster-26447.66043,Cluster-26447.22371,Cluster-26447.66517
GO:0010948	negative regulation of cell cycle process	biological_process	0.58885	1	2	966	221	126097	Cluster-26447.99213,Cluster-26447.114984
GO:0070851	growth factor receptor binding	molecular_function	0.58913	1	1	966	93	126097	Cluster-31356.0
GO:0031072	heat shock protein binding	molecular_function	0.59007	1	2	966	251	126097	Cluster-26447.95734,Cluster-26447.124172
GO:0004525	ribonuclease III activity	molecular_function	0.5901	1	1	966	80	126097	Cluster-26447.165515
GO:0032296	double-stranded RNA-specific ribonuclease activity	molecular_function	0.5901	1	1	966	80	126097	Cluster-26447.165515
GO:0043112	receptor metabolic process	biological_process	0.59129	1	1	966	103	126097	Cluster-26447.61385
GO:0006487	protein N-linked glycosylation	biological_process	0.59136	1	1	966	120	126097	Cluster-26447.63019
GO:0016682	oxidoreductase activity, acting on diphenols and related substances as donors, oxygen as acceptor	molecular_function	0.59154	1	1	966	103	126097	Cluster-26447.56410
GO:0030162	regulation of proteolysis	biological_process	0.59172	1	3	966	337	126097	Cluster-26447.114984,Cluster-26447.99213,Cluster-26447.75058
GO:0009064	glutamine family amino acid metabolic process	biological_process	0.59194	1	5	966	680	126097	Cluster-26447.113937,Cluster-26447.146217,Cluster-26447.88622,Cluster-26447.97680,Cluster-26447.48824
GO:0008536	Ran GTPase binding	molecular_function	0.59268	1	2	966	163	126097	Cluster-26447.158690,Cluster-26447.85635
GO:0051782	negative regulation of cell division	biological_process	0.59272	1	2	966	220	126097	Cluster-26447.99213,Cluster-26447.114984
GO:0043934	sporulation	biological_process	0.59364	1	2	966	208	126097	Cluster-26447.159084,Cluster-26447.56531
GO:0046933	proton-transporting ATP synthase activity, rotational mechanism	molecular_function	0.59384	1	1	966	109	126097	Cluster-26447.120543
GO:0072657	protein localization to membrane	biological_process	0.59546	1	6	966	766	126097	Cluster-26447.125274,Cluster-26447.65687,Cluster-26447.121926,Cluster-26447.120306,Cluster-26447.43983,Cluster-26447.184313
GO:0044428	nuclear part	cellular_component	0.59605	1	44	966	5430	126097	Cluster-26447.181772,Cluster-26447.184774,Cluster-26447.146700,Cluster-26447.99213,Cluster-26447.117280,Cluster-26447.204617,Cluster-26447.107986,Cluster-26447.181675,Cluster-26447.205044,Cluster-26447.204304,Cluster-26447.113791,Cluster-26447.107160,Cluster-26447.53906,Cluster-26447.40614,Cluster-26447.73778,Cluster-26447.85436,Cluster-26447.48330,Cluster-26447.24030,Cluster-26447.58799,Cluster-…
GO:0003910	DNA ligase (ATP) activity	molecular_function	0.59838	1	1	966	82	126097	Cluster-26447.105
GO:0006783	heme biosynthetic process	biological_process	0.5984	1	2	966	248	126097	Cluster-26447.112768,Cluster-26447.83904
GO:0019684	photosynthesis, light reaction	biological_process	0.59939	1	2	966	265	126097	Cluster-26447.158588,Cluster-26447.13697
GO:0015985	energy coupled proton transport, down electrochemical gradient	biological_process	0.59968	1	3	966	407	126097	Cluster-26447.10934,Cluster-26447.10933,Cluster-26447.120543
GO:0015986	ATP synthesis coupled proton transport	biological_process	0.59968	1	3	966	407	126097	Cluster-26447.120543,Cluster-26447.10933,Cluster-26447.10934
GO:0031981	nuclear lumen	cellular_component	0.60054	1	28	966	3461	126097	Cluster-26447.48424,Cluster-26447.184773,Cluster-26447.48334,Cluster-26447.3666,Cluster-26447.110145,Cluster-26447.140660,Cluster-26447.9447,Cluster-26447.58799,Cluster-26447.57410,Cluster-748.0,Cluster-26447.48330,Cluster-26447.40614,Cluster-26447.135888,Cluster-26447.135875,Cluster-26447.127758,Cluster-26447.48425,Cluster-26447.113791,Cluster-26447.53906,Cluster-26447.107160,Cluster-26447.20504…
GO:0019069	viral capsid assembly	biological_process	0.60055	1	2	966	255	126097	Cluster-26447.179565,Cluster-26447.169437
GO:0009117	nucleotide metabolic process	biological_process	0.60098	1	30	966	3984	126097	Cluster-26447.724,Cluster-26447.84141,Cluster-26447.153858,Cluster-26447.204182,Cluster-26447.99074,Cluster-26447.109452,Cluster-26447.155056,Cluster-26447.85633,Cluster-26447.148200,Cluster-26447.142960,Cluster-26447.181385,Cluster-26447.69821,Cluster-26447.37937,Cluster-26447.96780,Cluster-26447.108565,Cluster-26447.155053,Cluster-26447.10934,Cluster-26447.118735,Cluster-26447.10933,Cluster-264…
GO:0009725	response to hormone	biological_process	0.60361	1	3	966	360	126097	Cluster-26447.211131,Cluster-26447.195148,Cluster-26447.143611
GO:0006606	protein import into nucleus	biological_process	0.6059	1	3	966	359	126097	Cluster-26447.55764,Cluster-26447.73778,Cluster-26447.26715
GO:0034504	protein localization to nucleus	biological_process	0.6059	1	3	966	359	126097	Cluster-26447.55764,Cluster-26447.73778,Cluster-26447.26715
GO:0044744	protein targeting to nucleus	biological_process	0.6059	1	3	966	359	126097	Cluster-26447.26715,Cluster-26447.55764,Cluster-26447.73778
GO:0051170	nuclear import	biological_process	0.6059	1	3	966	359	126097	Cluster-26447.26715,Cluster-26447.55764,Cluster-26447.73778
GO:1902593	single-organism nuclear import	biological_process	0.6059	1	3	966	359	126097	Cluster-26447.26715,Cluster-26447.73778,Cluster-26447.55764
GO:0015698	inorganic anion transport	biological_process	0.60741	1	4	966	455	126097	Cluster-26447.204981,Cluster-26447.34247,Cluster-30803.0,Cluster-26447.88210
GO:0060089	molecular transducer activity	molecular_function	0.60771	1	16	966	1981	126097	Cluster-26447.56531,Cluster-26447.44385,Cluster-26447.137118,Cluster-458.0,Cluster-26447.102118,Cluster-26447.156505,Cluster-26447.79310,Cluster-26447.117280,Cluster-26447.81562,Cluster-26447.33127,Cluster-26447.156490,Cluster-26447.156997,Cluster-26447.52943,Cluster-26447.153504,Cluster-26447.2402,Cluster-26447.200669
GO:0015937	coenzyme A biosynthetic process	biological_process	0.60779	1	1	966	115	126097	Cluster-26447.118735
GO:0033866	nucleoside bisphosphate biosynthetic process	biological_process	0.60779	1	1	966	115	126097	Cluster-26447.118735
GO:0034030	ribonucleoside bisphosphate biosynthetic process	biological_process	0.60779	1	1	966	115	126097	Cluster-26447.118735
GO:0034033	purine nucleoside bisphosphate biosynthetic process	biological_process	0.60779	1	1	966	115	126097	Cluster-26447.118735
GO:0015074	DNA integration	biological_process	0.60881	1	8	966	918	126097	Cluster-26447.142300,Cluster-26447.216733,Cluster-26447.197696,Cluster-26447.199694,Cluster-26447.68826,Cluster-1340.1,Cluster-26447.74891,Cluster-26447.103711
GO:0044703	multi-organism reproductive process	biological_process	0.609	1	8	966	1013	126097	Cluster-26447.46051,Cluster-26447.46049,Cluster-26447.190892,Cluster-26447.85601,Cluster-26447.1908,Cluster-26447.163880,Cluster-26447.201669,Cluster-26447.148206
GO:0006486	protein glycosylation	biological_process	0.61008	1	4	966	511	126097	Cluster-26447.63019,Cluster-26447.194966,Cluster-26447.44436,Cluster-26447.13906
GO:0043413	macromolecule glycosylation	biological_process	0.61008	1	4	966	511	126097	Cluster-26447.44436,Cluster-26447.13906,Cluster-26447.63019,Cluster-26447.194966
GO:0060255	regulation of macromolecule metabolic process	biological_process	0.61186	1	103	966	12956	126097	Cluster-26447.103862,Cluster-26447.190134,Cluster-26447.147331,Cluster-26447.13725,Cluster-26447.117280,Cluster-26447.204182,Cluster-26447.195148,Cluster-26447.132072,Cluster-26447.40614,Cluster-26447.159813,Cluster-26447.184313,Cluster-26447.119099,Cluster-26447.180526,Cluster-26447.122732,Cluster-27328.1,Cluster-26447.111620,Cluster-26447.72759,Cluster-26447.185243,Cluster-26447.204981,Cluster-…
GO:0004497	monooxygenase activity	molecular_function	0.61329	1	3	966	397	126097	Cluster-26447.6629,Cluster-26447.98682,Cluster-26447.185494
GO:0016893	endonuclease activity, active with either ribo- or deoxyribonucleic acids and producing 5'-phosphomonoesters	molecular_function	0.61349	1	5	966	587	126097	Cluster-26447.107555,Cluster-26447.165515,Cluster-26447.68348,Cluster-26447.69821,Cluster-26447.212926
GO:0006555	methionine metabolic process	biological_process	0.61363	1	1	966	128	126097	Cluster-26447.181705
GO:0042151	nematocyst	cellular_component	0.61391	1	1	966	95	126097	Cluster-26447.84540
GO:0010496	intercellular transport	biological_process	0.61444	1	1	966	106	126097	Cluster-26447.54173
GO:0044000	movement in host	biological_process	0.61444	1	1	966	106	126097	Cluster-26447.54173
GO:0046739	transport of virus in multicellular host	biological_process	0.61444	1	1	966	106	126097	Cluster-26447.54173
GO:0046740	transport of virus in host, cell to cell	biological_process	0.61444	1	1	966	106	126097	Cluster-26447.54173
GO:0051814	movement in other organism involved in symbiotic interaction	biological_process	0.61444	1	1	966	106	126097	Cluster-26447.54173
GO:1902586	multi-organism intercellular transport	biological_process	0.61444	1	1	966	106	126097	Cluster-26447.54173
GO:0046677	response to antibiotic	biological_process	0.61488	1	1	966	109	126097	Cluster-26447.11686
GO:0009617	response to bacterium	biological_process	0.61516	1	3	966	389	126097	Cluster-26447.167327,Cluster-26447.120331,Cluster-26447.109788
GO:0042742	defense response to bacterium	biological_process	0.61516	1	3	966	389	126097	Cluster-26447.109788,Cluster-26447.120331,Cluster-26447.167327
GO:0031974	membrane-enclosed lumen	cellular_component	0.61534	1	29	966	3612	126097	Cluster-26447.135875,Cluster-26447.127758,Cluster-26447.48330,Cluster-26447.40614,Cluster-26447.135888,Cluster-26447.113791,Cluster-26447.53906,Cluster-26447.107160,Cluster-26447.48425,Cluster-26447.107986,Cluster-26447.204617,Cluster-26447.205044,Cluster-26447.204304,Cluster-26447.184774,Cluster-26447.181772,Cluster-26447.172340,Cluster-26447.141736,Cluster-26447.117280,Cluster-26447.48424,Clust…
GO:0044798	nuclear transcription factor complex	cellular_component	0.61746	1	3	966	374	126097	Cluster-26447.3666,Cluster-26447.172340,Cluster-26447.58799
GO:0031225	anchored component of membrane	cellular_component	0.6181	1	1	966	121	126097	Cluster-26447.118335
GO:0005198	structural molecule activity	molecular_function	0.61837	1	40	966	5515	126097	Cluster-26447.102600,Cluster-26447.83005,Cluster-26447.144646,Cluster-26447.209963,Cluster-26447.107355,Cluster-26447.58799,Cluster-26447.124497,Cluster-26447.127219,Cluster-26447.140820,Cluster-26447.122861,Cluster-26447.29217,Cluster-26447.184313,Cluster-26447.42104,Cluster-26447.181330,Cluster-26447.113331,Cluster-26447.130566,Cluster-26447.117627,Cluster-26447.73778,Cluster-26447.45139,Cluste…
GO:0070887	cellular response to chemical stimulus	biological_process	0.6195	1	4	966	514	126097	Cluster-26447.197288,Cluster-26447.211242,Cluster-26447.9012,Cluster-26447.166092
GO:0006778	porphyrin-containing compound metabolic process	biological_process	0.61979	1	5	966	677	126097	Cluster-26447.83904,Cluster-26447.91564,Cluster-26447.102068,Cluster-26447.112768,Cluster-26447.91562
GO:1902533	positive regulation of intracellular signal transduction	biological_process	0.62021	1	1	966	133	126097	Cluster-26447.204930
GO:0000175	3'-5'-exoribonuclease activity	molecular_function	0.62099	1	1	966	100	126097	Cluster-26447.119064
GO:0007088	regulation of mitotic nuclear division	biological_process	0.62192	1	2	966	229	126097	Cluster-26447.99213,Cluster-26447.114984
GO:0043900	regulation of multi-organism process	biological_process	0.6229	1	2	966	247	126097	Cluster-26447.212720,Cluster-26447.111580
GO:0016055	Wnt signaling pathway	biological_process	0.62301	1	2	966	240	126097	Cluster-27210.2,Cluster-26447.208563
GO:0072525	pyridine-containing compound biosynthetic process	biological_process	0.62398	1	2	966	265	126097	Cluster-26447.98682,Cluster-26447.197288
GO:0031323	regulation of cellular metabolic process	biological_process	0.6241	1	103	966	13021	126097	Cluster-26447.81217,Cluster-26447.120301,Cluster-26447.122713,Cluster-26447.127538,Cluster-26447.165515,Cluster-26447.159650,Cluster-26447.118198,Cluster-26447.163880,Cluster-26447.168299,Cluster-26447.38965,Cluster-26447.135888,Cluster-26447.94856,Cluster-26447.27742,Cluster-26447.87881,Cluster-26447.84191,Cluster-26447.46077,Cluster-26447.147946,Cluster-26447.52943,Cluster-26447.60056,Cluster-2…
GO:0002949	tRNA threonylcarbamoyladenosine modification	biological_process	0.62611	1	5	966	561	126097	Cluster-9264.0,Cluster-26447.165528,Cluster-26447.190134,Cluster-26447.184313,Cluster-26447.58449
GO:0070525	tRNA threonylcarbamoyladenosine metabolic process	biological_process	0.62611	1	5	966	561	126097	Cluster-26447.165528,Cluster-26447.184313,Cluster-26447.190134,Cluster-9264.0,Cluster-26447.58449
GO:0003707	steroid hormone receptor activity	molecular_function	0.6268	1	1	966	118	126097	Cluster-26447.52943
GO:0050801	ion homeostasis	biological_process	0.62697	1	4	966	585	126097	Cluster-26447.105501,Cluster-26447.182885,Cluster-1202.1,Cluster-1202.0
GO:0055080	cation homeostasis	biological_process	0.62697	1	4	966	585	126097	Cluster-1202.0,Cluster-1202.1,Cluster-26447.182885,Cluster-26447.105501
GO:0098771	inorganic ion homeostasis	biological_process	0.62697	1	4	966	585	126097	Cluster-26447.105501,Cluster-26447.182885,Cluster-1202.0,Cluster-1202.1
GO:0044452	nucleolar part	cellular_component	0.62705	1	1	966	124	126097	Cluster-26447.53906
GO:0015936	coenzyme A metabolic process	biological_process	0.62708	1	1	966	122	126097	Cluster-26447.118735
GO:0044770	cell cycle phase transition	biological_process	0.62743	1	2	966	233	126097	Cluster-26447.99213,Cluster-26447.114984
GO:0044772	mitotic cell cycle phase transition	biological_process	0.62743	1	2	966	233	126097	Cluster-26447.99213,Cluster-26447.114984
GO:1901987	regulation of cell cycle phase transition	biological_process	0.62743	1	2	966	233	126097	Cluster-26447.114984,Cluster-26447.99213
GO:1901990	regulation of mitotic cell cycle phase transition	biological_process	0.62743	1	2	966	233	126097	Cluster-26447.99213,Cluster-26447.114984
GO:0009231	riboflavin biosynthetic process	biological_process	0.62812	1	1	966	140	126097	Cluster-26447.162961
GO:0042727	flavin-containing compound biosynthetic process	biological_process	0.62812	1	1	966	140	126097	Cluster-26447.162961
GO:0006353	DNA-templated transcription, termination	biological_process	0.62849	1	1	966	121	126097	Cluster-26447.185243
GO:0006753	nucleoside phosphate metabolic process	biological_process	0.6286	1	30	966	4032	126097	Cluster-26447.100182,Cluster-26447.99447,Cluster-26447.155054,Cluster-26447.109407,Cluster-26447.60729,Cluster-26447.75347,Cluster-26447.120543,Cluster-26447.109344,Cluster-26447.165528,Cluster-26447.102199,Cluster-26447.155043,Cluster-26447.10933,Cluster-26447.10934,Cluster-26447.118735,Cluster-26447.155053,Cluster-26447.108565,Cluster-26447.96780,Cluster-26447.37937,Cluster-26447.69821,Cluster-…
GO:0019900	kinase binding	molecular_function	0.62892	1	2	966	259	126097	Cluster-26447.34800,Cluster-26447.99213
GO:0046148	pigment biosynthetic process	biological_process	0.62957	1	4	966	546	126097	Cluster-26447.70648,Cluster-26447.112768,Cluster-26447.83904,Cluster-26447.123064
GO:0045502	dynein binding	molecular_function	0.6296	1	3	966	352	126097	Cluster-26447.73778,Cluster-26447.46051,Cluster-26447.46049
GO:0065003	macromolecular complex assembly	biological_process	0.63007	1	17	966	2162	126097	Cluster-26447.156490,Cluster-26447.181330,Cluster-26447.20884,Cluster-26447.93149,Cluster-26447.73778,Cluster-26447.46049,Cluster-26447.156505,Cluster-26447.46051,Cluster-26447.179322,Cluster-26447.13697,Cluster-26447.131610,Cluster-26447.110949,Cluster-26447.45997,Cluster-26447.44224,Cluster-26447.109529,Cluster-1298.0,Cluster-26447.34800
GO:0005496	steroid binding	molecular_function	0.63014	1	1	966	119	126097	Cluster-26447.52943
GO:0004532	exoribonuclease activity	molecular_function	0.63178	1	1	966	102	126097	Cluster-26447.119064
GO:0016896	exoribonuclease activity, producing 5'-phosphomonoesters	molecular_function	0.63178	1	1	966	102	126097	Cluster-26447.119064
GO:0016668	oxidoreductase activity, acting on a sulfur group of donors, NAD(P) as acceptor	molecular_function	0.63263	1	1	966	133	126097	Cluster-26447.167194
GO:0047134	protein-disulfide reductase activity	molecular_function	0.63263	1	1	966	133	126097	Cluster-26447.167194
GO:0005231	excitatory extracellular ligand-gated ion channel activity	molecular_function	0.63274	1	1	966	93	126097	Cluster-26447.56531
GO:0016641	oxidoreductase activity, acting on the CH-NH2 group of donors, oxygen as acceptor	molecular_function	0.63274	1	1	966	140	126097	Cluster-26447.100703
GO:0051704	multi-organism process	biological_process	0.63317	1	61	966	7438	126097	Cluster-26447.12299,Cluster-26447.187623,Cluster-26447.111493,Cluster-26447.190892,Cluster-26447.216685,Cluster-26447.122732,Cluster-26447.84540,Cluster-26447.28590,Cluster-26447.59093,Cluster-26447.33592,Cluster-26447.83472,Cluster-26447.112972,Cluster-26447.131610,Cluster-26447.179565,Cluster-26447.61385,Cluster-26447.1908,Cluster-26447.46049,Cluster-26447.111580,Cluster-26447.106238,Cluster-26…
GO:0007020	microtubule nucleation	biological_process	0.63347	1	1	966	113	126097	Cluster-26447.44224
GO:0010968	regulation of microtubule nucleation	biological_process	0.63347	1	1	966	113	126097	Cluster-26447.44224
GO:0031112	positive regulation of microtubule polymerization or depolymerization	biological_process	0.63347	1	1	966	113	126097	Cluster-26447.44224
GO:0031113	regulation of microtubule polymerization	biological_process	0.63347	1	1	966	113	126097	Cluster-26447.44224
GO:0031116	positive regulation of microtubule polymerization	biological_process	0.63347	1	1	966	113	126097	Cluster-26447.44224
GO:0046785	microtubule polymerization	biological_process	0.63347	1	1	966	113	126097	Cluster-26447.44224
GO:0090063	positive regulation of microtubule nucleation	biological_process	0.63347	1	1	966	113	126097	Cluster-26447.44224
GO:0004520	endodeoxyribonuclease activity	molecular_function	0.63376	1	3	966	364	126097	Cluster-26447.107555,Cluster-26447.69821,Cluster-26447.212926
GO:0070925	organelle assembly	biological_process	0.63435	1	4	966	518	126097	Cluster-26447.118404,Cluster-26447.156505,Cluster-26447.156490,Cluster-26447.34800
GO:0032886	regulation of microtubule-based process	biological_process	0.63484	1	2	966	242	126097	Cluster-26447.34800,Cluster-26447.44224
GO:0070507	regulation of microtubule cytoskeleton organization	biological_process	0.63484	1	2	966	242	126097	Cluster-26447.44224,Cluster-26447.34800
GO:0031640	killing of cells of other organism	biological_process	0.63487	1	1	966	113	126097	Cluster-26447.83472
GO:0044364	disruption of cells of other organism	biological_process	0.63487	1	1	966	113	126097	Cluster-26447.83472
GO:0042176	regulation of protein catabolic process	biological_process	0.63504	1	2	966	235	126097	Cluster-26447.99213,Cluster-26447.114984
GO:0051188	cofactor biosynthetic process	biological_process	0.63751	1	15	966	1988	126097	Cluster-26447.88210,Cluster-26447.98682,Cluster-26447.118364,Cluster-26447.118735,Cluster-26447.84141,Cluster-26447.724,Cluster-26447.96215,Cluster-26447.56410,Cluster-26447.99447,Cluster-26447.113672,Cluster-26447.112768,Cluster-26447.12358,Cluster-26447.84696,Cluster-26447.83904,Cluster-26447.58690
GO:0019079	viral genome replication	biological_process	0.63858	1	5	966	648	126097	Cluster-26447.33049,Cluster-26447.12834,Cluster-26447.122456,Cluster-26447.216958,Cluster-26447.55901
GO:0004553	hydrolase activity, hydrolyzing O-glycosyl compounds	molecular_function	0.63897	1	17	966	2245	126097	Cluster-26447.6629,Cluster-26447.211581,Cluster-26447.186119,Cluster-26447.26075,Cluster-26202.0,Cluster-26447.135627,Cluster-26447.115151,Cluster-26447.74891,Cluster-26447.191833,Cluster-26447.107535,Cluster-2688.5,Cluster-26447.113691,Cluster-26447.26073,Cluster-26447.135625,Cluster-26447.181649,Cluster-26447.120331,Cluster-26447.186121
GO:0004559	alpha-mannosidase activity	molecular_function	0.63937	1	1	966	114	126097	Cluster-26447.120331
GO:0006366	transcription from RNA polymerase II promoter	biological_process	0.63939	1	9	966	1216	126097	Cluster-26447.107160,Cluster-26447.48425,Cluster-26447.186121,Cluster-26447.115609,Cluster-26447.48424,Cluster-26447.40614,Cluster-26447.172340,Cluster-26447.58799,Cluster-26447.186119
GO:0044769	ATPase activity, coupled to transmembrane movement of ions, rotational mechanism	molecular_function	0.64078	1	1	966	132	126097	Cluster-26447.120543
GO:0042168	heme metabolic process	biological_process	0.64121	1	2	966	269	126097	Cluster-26447.112768,Cluster-26447.83904
GO:0042775	mitochondrial ATP synthesis coupled electron transport	biological_process	0.64173	1	5	966	670	126097	Cluster-26447.99074,Cluster-26447.84141,Cluster-26447.181385,Cluster-26447.99447,Cluster-26447.37937
GO:0019888	protein phosphatase regulator activity	molecular_function	0.64233	1	1	966	121	126097	Cluster-26447.53906
GO:0043066	negative regulation of apoptotic process	biological_process	0.64236	1	1	966	123	126097	Cluster-26447.86266
GO:0043069	negative regulation of programmed cell death	biological_process	0.64236	1	1	966	123	126097	Cluster-26447.86266
GO:0060548	negative regulation of cell death	biological_process	0.64236	1	1	966	123	126097	Cluster-26447.86266
GO:0005666	DNA-directed RNA polymerase III complex	cellular_component	0.64262	1	1	966	182	126097	Cluster-26447.135875
GO:0043462	regulation of ATPase activity	biological_process	0.64284	1	1	966	124	126097	Cluster-26447.63369
GO:0009539	photosystem II reaction center	cellular_component	0.6434	1	2	966	261	126097	Cluster-26447.143611,Cluster-26447.120346
GO:0005102	receptor binding	molecular_function	0.64345	1	16	966	2038	126097	Cluster-26447.99448,Cluster-26447.179322,Cluster-26447.72014,Cluster-26447.46049,Cluster-26447.204930,Cluster-31356.0,Cluster-26447.46051,Cluster-26447.84716,Cluster-21685.4,Cluster-26447.181330,Cluster-26447.20884,Cluster-12330.0,Cluster-26447.175970,Cluster-26447.85601,Cluster-26447.22371,Cluster-26447.163186
GO:0009271	phage shock	biological_process	0.64356	1	1	966	95	126097	Cluster-26447.112972
GO:0098586	cellular response to virus	biological_process	0.64356	1	1	966	95	126097	Cluster-26447.112972
GO:0009991	response to extracellular stimulus	biological_process	0.64357	1	2	966	265	126097	Cluster-26447.109788,Cluster-26447.118404
GO:0031668	cellular response to extracellular stimulus	biological_process	0.64357	1	2	966	265	126097	Cluster-26447.118404,Cluster-26447.109788
GO:0071496	cellular response to external stimulus	biological_process	0.64357	1	2	966	265	126097	Cluster-26447.118404,Cluster-26447.109788
GO:0031324	negative regulation of cellular metabolic process	biological_process	0.64359	1	5	966	622	126097	Cluster-26447.99213,Cluster-26447.114984,Cluster-26447.75058,Cluster-26447.107804,Cluster-26447.107816
GO:0042178	xenobiotic catabolic process	biological_process	0.64489	1	1	966	117	126097	Cluster-26447.9012
GO:0044033	multi-organism metabolic process	biological_process	0.6461	1	2	966	262	126097	Cluster-26447.12834,Cluster-26447.187623
GO:0000921	septin ring assembly	biological_process	0.6472	1	1	966	121	126097	Cluster-26447.34800
GO:0005940	septin ring	cellular_component	0.6472	1	1	966	121	126097	Cluster-26447.34800
GO:0031106	septin ring organization	biological_process	0.6472	1	1	966	121	126097	Cluster-26447.34800
GO:0032156	septin cytoskeleton	cellular_component	0.6472	1	1	966	121	126097	Cluster-26447.34800
GO:0032185	septin cytoskeleton organization	biological_process	0.6472	1	1	966	121	126097	Cluster-26447.34800
GO:0015923	mannosidase activity	molecular_function	0.6473	1	1	966	119	126097	Cluster-26447.120331
GO:0005801	cis-Golgi network	cellular_component	0.64763	1	1	966	130	126097	Cluster-26447.205786
GO:0005732	small nucleolar ribonucleoprotein complex	cellular_component	0.64968	1	1	966	132	126097	Cluster-26447.53906
GO:0000075	cell cycle checkpoint	biological_process	0.65012	1	2	966	269	126097	Cluster-26447.114984,Cluster-26447.99213
GO:0042221	response to chemical	biological_process	0.65044	1	14	966	1830	126097	Cluster-26447.211131,Cluster-16727.6,Cluster-26447.9012,Cluster-26447.143611,Cluster-26447.67052,Cluster-26447.11686,Cluster-26447.56531,Cluster-26447.197288,Cluster-26447.166092,Cluster-26447.211242,Cluster-26447.208563,Cluster-26447.195148,Cluster-26447.216685,Cluster-26447.142512
GO:0018193	peptidyl-amino acid modification	biological_process	0.65072	1	4	966	545	126097	Cluster-26447.63019,Cluster-26447.96215,Cluster-26447.100558,Cluster-26447.74527
GO:0065007	biological regulation	biological_process	0.65085	1	197	966	24656	126097	Cluster-26447.106016,Cluster-26447.26693,Cluster-26447.88215,Cluster-26447.57455,Cluster-26447.46051,Cluster-26447.86266,Cluster-26447.167194,Cluster-26447.56531,Cluster-26447.111366,Cluster-26447.82999,Cluster-26447.142960,Cluster-26447.155828,Cluster-26447.119064,Cluster-26447.133826,Cluster-26447.124429,Cluster-26447.190563,Cluster-26447.13031,Cluster-26447.85601,Cluster-1202.1,Cluster-26447.6…
GO:0000956	nuclear-transcribed mRNA catabolic process	biological_process	0.65149	1	1	966	120	126097	Cluster-26447.26693
GO:0000910	cytokinesis	biological_process	0.65387	1	5	966	663	126097	Cluster-26447.73989,Cluster-26447.73778,Cluster-26447.142960,Cluster-4869.0,Cluster-26447.114984
GO:0000377	RNA splicing, via transesterification reactions with bulged adenosine as nucleophile	biological_process	0.65418	1	3	966	423	126097	Cluster-26447.73778,Cluster-26447.58618,Cluster-26447.113691
GO:0000398	mRNA splicing, via spliceosome	biological_process	0.65418	1	3	966	423	126097	Cluster-26447.73778,Cluster-26447.58618,Cluster-26447.113691
GO:0051783	regulation of nuclear division	biological_process	0.65518	1	2	966	248	126097	Cluster-26447.114984,Cluster-26447.99213
GO:0031226	intrinsic component of plasma membrane	cellular_component	0.65554	1	7	966	958	126097	Cluster-26447.56531,Cluster-26447.66120,Cluster-26447.22371,Cluster-26447.66517,Cluster-31356.0,Cluster-26447.118335,Cluster-26447.94903
GO:0000087	mitotic M phase	biological_process	0.65649	1	1	966	114	126097	Cluster-26447.34800
GO:0098763	mitotic cell cycle phase	biological_process	0.65649	1	1	966	114	126097	Cluster-26447.34800
GO:0005741	mitochondrial outer membrane	cellular_component	0.65657	1	4	966	526	126097	Cluster-20433.0,Cluster-26447.107535,Cluster-26447.43983,Cluster-26447.84696
GO:0031968	organelle outer membrane	cellular_component	0.65657	1	4	966	526	126097	Cluster-26447.43983,Cluster-20433.0,Cluster-26447.107535,Cluster-26447.84696
GO:0043093	FtsZ-dependent cytokinesis	biological_process	0.65751	1	3	966	430	126097	Cluster-26447.73778,Cluster-26447.114984,Cluster-26447.142960
GO:0019082	viral protein processing	biological_process	0.6579	1	1	966	131	126097	Cluster-26447.187623
GO:0000808	origin recognition complex	cellular_component	0.65825	1	2	966	249	126097	Cluster-26447.48330,Cluster-26447.48334
GO:0044454	nuclear chromosome part	cellular_component	0.65858	1	5	966	633	126097	Cluster-26447.184774,Cluster-26447.184773,Cluster-26447.48330,Cluster-26447.48334,Cluster-26447.135888
GO:0001906	cell killing	biological_process	0.65872	1	1	966	121	126097	Cluster-26447.83472
GO:0005351	sugar:proton symporter activity	molecular_function	0.65982	1	1	966	128	126097	Cluster-26447.152478
GO:0015295	solute:proton symporter activity	molecular_function	0.65982	1	1	966	128	126097	Cluster-26447.152478
GO:0009987	cellular process	biological_process	0.6603	1	570	966	72257	126097	Cluster-26447.24030,Cluster-26447.169634,Cluster-26447.105908,Cluster-26447.77676,Cluster-26447.119099,Cluster-26447.83472,Cluster-26447.48824,Cluster-26447.13697,Cluster-26447.144646,Cluster-26447.203505,Cluster-26447.207851,Cluster-26447.163928,Cluster-26447.153504,Cluster-26447.95407,Cluster-26447.216958,Cluster-26447.37339,Cluster-26447.147331,Cluster-26447.56934,Cluster-26447.103862,Cluster-…
GO:0032505	reproduction of a single-celled organism	biological_process	0.66048	1	3	966	433	126097	Cluster-26447.142960,Cluster-26447.114984,Cluster-26447.73778
GO:0007067	mitotic nuclear division	biological_process	0.66105	1	4	966	524	126097	Cluster-26447.99213,Cluster-26447.114984,Cluster-26447.53906,Cluster-26447.34800
GO:0005791	rough endoplasmic reticulum	cellular_component	0.66108	1	1	966	151	126097	Cluster-26447.121926
GO:0030867	rough endoplasmic reticulum membrane	cellular_component	0.66108	1	1	966	151	126097	Cluster-26447.121926
GO:0006090	pyruvate metabolic process	biological_process	0.66137	1	7	966	1016	126097	Cluster-26447.91395,Cluster-26447.117840,Cluster-26447.42067,Cluster-26447.109407,Cluster-26447.147762,Cluster-26447.108565,Cluster-26447.109344
GO:0051052	regulation of DNA metabolic process	biological_process	0.66166	1	1	966	139	126097	Cluster-26447.46077
GO:0000145	exocyst	cellular_component	0.66199	1	2	966	251	126097	Cluster-26447.195148,Cluster-26447.118800
GO:0032270	positive regulation of cellular protein metabolic process	biological_process	0.6622	1	1	966	142	126097	Cluster-26447.163186
GO:0051247	positive regulation of protein metabolic process	biological_process	0.6622	1	1	966	142	126097	Cluster-26447.163186
GO:0032040	small-subunit processome	cellular_component	0.66231	1	3	966	367	126097	Cluster-26447.155419,Cluster-26447.53906,Cluster-26447.45949
GO:0030286	dynein complex	cellular_component	0.66249	1	3	966	369	126097	Cluster-26447.73778,Cluster-26447.46051,Cluster-26447.46049
GO:0044763	single-organism cellular process	biological_process	0.66327	1	322	966	39768	126097	Cluster-26447.33592,Cluster-26447.67052,Cluster-26447.135732,Cluster-16727.6,Cluster-26447.163186,Cluster-26447.209963,Cluster-26447.10934,Cluster-26447.155043,Cluster-26447.146217,Cluster-26447.59987,Cluster-26447.107535,Cluster-26447.1432,Cluster-26447.74952,Cluster-26447.58618,Cluster-26447.11686,Cluster-26447.69821,Cluster-26447.87175,Cluster-26447.46049,Cluster-26447.125593,Cluster-26447.137…
GO:0006553	lysine metabolic process	biological_process	0.66453	1	6	966	774	126097	Cluster-26447.98682,Cluster-26447.187623,Cluster-26447.44385,Cluster-26447.112768,Cluster-26447.724,Cluster-26447.9847
GO:0006955	immune response	biological_process	0.66607	1	7	966	863	126097	Cluster-31356.0,Cluster-26447.212720,Cluster-26447.79081,Cluster-26447.204930,Cluster-26447.114501,Cluster-26447.191579,Cluster-26447.164902
GO:0022857	transmembrane transporter activity	molecular_function	0.6663	1	67	966	8333	126097	Cluster-26447.61698,Cluster-26447.77712,Cluster-26447.120543,Cluster-26447.86969,Cluster-26447.26018,Cluster-26447.86962,Cluster-26447.182885,Cluster-26447.48334,Cluster-26447.200669,Cluster-26447.114984,Cluster-26447.113291,Cluster-26447.125377,Cluster-26447.56531,Cluster-26447.44436,Cluster-26447.60113,Cluster-26447.125074,Cluster-26447.152478,Cluster-26447.109208,Cluster-26447.142960,Cluster-2…
GO:0016832	aldehyde-lyase activity	molecular_function	0.66677	1	1	966	172	126097	Cluster-26447.42104
GO:0004190	aspartic-type endopeptidase activity	molecular_function	0.66728	1	8	966	1104	126097	Cluster-5663.1,Cluster-26447.68826,Cluster-26447.206479,Cluster-26447.26765,Cluster-8591.0,Cluster-26447.23231,Cluster-26447.123882,Cluster-26447.159084
GO:0070001	aspartic-type peptidase activity	molecular_function	0.66728	1	8	966	1104	126097	Cluster-5663.1,Cluster-26447.68826,Cluster-26447.206479,Cluster-8591.0,Cluster-26447.26765,Cluster-26447.123882,Cluster-26447.23231,Cluster-26447.159084
GO:0052547	regulation of peptidase activity	biological_process	0.66814	1	1	966	125	126097	Cluster-26447.75058
GO:0052548	regulation of endopeptidase activity	biological_process	0.66814	1	1	966	125	126097	Cluster-26447.75058
GO:0017016	Ras GTPase binding	molecular_function	0.66913	1	2	966	204	126097	Cluster-26447.158690,Cluster-26447.85635
GO:0031267	small GTPase binding	molecular_function	0.66913	1	2	966	204	126097	Cluster-26447.158690,Cluster-26447.85635
GO:0051020	GTPase binding	molecular_function	0.66913	1	2	966	204	126097	Cluster-26447.85635,Cluster-26447.158690
GO:1901068	guanosine-containing compound metabolic process	biological_process	0.66925	1	1	966	141	126097	Cluster-26447.85633
GO:0032940	secretion by cell	biological_process	0.66949	1	5	966	626	126097	Cluster-26447.118800,Cluster-26447.140126,Cluster-26447.33592,Cluster-26447.195148,Cluster-26447.83904
GO:0019208	phosphatase regulator activity	molecular_function	0.67026	1	1	966	131	126097	Cluster-26447.53906
GO:0009432	SOS response	biological_process	0.67144	1	1	966	140	126097	Cluster-26447.109788
GO:0016482	cytoplasmic transport	biological_process	0.67276	1	12	966	1607	126097	Cluster-26447.26715,Cluster-26447.65687,Cluster-26447.73778,Cluster-26447.125274,Cluster-26447.35196,Cluster-26447.120306,Cluster-26447.9095,Cluster-26447.43983,Cluster-26447.184313,Cluster-20433.0,Cluster-26447.107535,Cluster-26447.55764
GO:0080090	regulation of primary metabolic process	biological_process	0.67474	1	100	966	12784	126097	Cluster-26447.185243,Cluster-26447.204981,Cluster-26447.111620,Cluster-26447.72759,Cluster-26447.180526,Cluster-26447.122732,Cluster-26447.184313,Cluster-26447.119099,Cluster-26447.159813,Cluster-26447.132072,Cluster-26447.40614,Cluster-26447.13725,Cluster-26447.117280,Cluster-26447.195148,Cluster-26447.204182,Cluster-26447.103862,Cluster-26447.190134,Cluster-26447.147331,Cluster-26447.143611,Clu…
GO:0048583	regulation of response to stimulus	biological_process	0.67556	1	6	966	840	126097	Cluster-27210.2,Cluster-26447.142512,Cluster-26447.204930,Cluster-26447.212720,Cluster-26447.164902,Cluster-26447.211242
GO:0044712	single-organism catabolic process	biological_process	0.67574	1	18	966	2404	126097	Cluster-26447.91562,Cluster-26447.99213,Cluster-26447.724,Cluster-26447.171743,Cluster-26447.108565,Cluster-26447.83904,Cluster-26447.118404,Cluster-26447.9847,Cluster-26447.109344,Cluster-26447.86326,Cluster-26447.98682,Cluster-26447.162631,Cluster-26447.91564,Cluster-26447.112768,Cluster-26447.135732,Cluster-26447.114984,Cluster-26447.65262,Cluster-26447.109407
GO:0004298	threonine-type endopeptidase activity	molecular_function	0.67707	1	1	966	184	126097	Cluster-26447.70052
GO:0070003	threonine-type peptidase activity	molecular_function	0.67707	1	1	966	184	126097	Cluster-26447.70052
GO:0010038	response to metal ion	biological_process	0.67711	1	1	966	135	126097	Cluster-26447.67052
GO:0019354	siroheme biosynthetic process	biological_process	0.67788	1	1	966	134	126097	Cluster-26447.112768
GO:0043115	precorrin-2 dehydrogenase activity	molecular_function	0.67788	1	1	966	134	126097	Cluster-26447.112768
GO:0046156	siroheme metabolic process	biological_process	0.67788	1	1	966	134	126097	Cluster-26447.112768
GO:0048878	chemical homeostasis	biological_process	0.67822	1	4	966	626	126097	Cluster-1202.0,Cluster-1202.1,Cluster-26447.105501,Cluster-26447.182885
GO:0004930	G-protein coupled receptor activity	molecular_function	0.67863	1	3	966	406	126097	Cluster-26447.44385,Cluster-26447.2402,Cluster-26447.33127
GO:0003006	developmental process involved in reproduction	biological_process	0.68045	1	3	966	468	126097	Cluster-26447.181705,Cluster-26447.50022,Cluster-26447.75058
GO:0007346	regulation of mitotic cell cycle	biological_process	0.68121	1	2	966	266	126097	Cluster-26447.99213,Cluster-26447.114984
GO:0043085	positive regulation of catalytic activity	biological_process	0.6826	1	1	966	140	126097	Cluster-26447.26693
GO:0000776	kinetochore	cellular_component	0.68276	1	4	966	536	126097	Cluster-26447.184773,Cluster-26447.135888,Cluster-26447.34800,Cluster-26447.184774
GO:0048584	positive regulation of response to stimulus	biological_process	0.68356	1	2	966	297	126097	Cluster-26447.204930,Cluster-26447.164902
GO:0046496	nicotinamide nucleotide metabolic process	biological_process	0.68578	1	8	966	1208	126097	Cluster-26447.108565,Cluster-26447.60729,Cluster-26447.109407,Cluster-26447.148200,Cluster-26447.109344,Cluster-26447.109452,Cluster-26447.153858,Cluster-26447.724
GO:0070085	glycosylation	biological_process	0.68615	1	4	966	566	126097	Cluster-26447.194966,Cluster-26447.63019,Cluster-26447.13906,Cluster-26447.44436
GO:0016763	transferase activity, transferring pentosyl groups	molecular_function	0.6872	1	3	966	390	126097	Cluster-26447.138049,Cluster-26447.81057,Cluster-26447.77281
GO:0005643	nuclear pore	cellular_component	0.68812	1	1	966	147	126097	Cluster-26447.9408
GO:0005615	extracellular space	cellular_component	0.68874	1	5	966	667	126097	Cluster-26447.163186,Cluster-26447.20884,Cluster-26447.181330,Cluster-26447.46051,Cluster-26447.46049
GO:0004620	phospholipase activity	molecular_function	0.68984	1	1	966	109	126097	Cluster-26447.41274
GO:0016569	covalent chromatin modification	biological_process	0.69028	1	2	966	242	126097	Cluster-26447.48424,Cluster-26447.48425
GO:0016570	histone modification	biological_process	0.69028	1	2	966	242	126097	Cluster-26447.48425,Cluster-26447.48424
GO:0060590	ATPase regulator activity	molecular_function	0.69062	1	2	966	322	126097	Cluster-26447.63369,Cluster-26447.135888
GO:0042886	amide transport	biological_process	0.69119	1	1	966	112	126097	Cluster-26447.84540
GO:0008176	tRNA (guanine-N7-)-methyltransferase activity	molecular_function	0.69226	1	1	966	122	126097	Cluster-26447.125593
GO:0009259	ribonucleotide metabolic process	biological_process	0.69333	1	20	966	2837	126097	Cluster-26447.85633,Cluster-26447.84141,Cluster-26447.99074,Cluster-26447.204182,Cluster-26447.96780,Cluster-26447.37937,Cluster-26447.108565,Cluster-26447.181385,Cluster-26447.142960,Cluster-26447.69821,Cluster-26447.165528,Cluster-26447.120543,Cluster-26447.109344,Cluster-26447.10934,Cluster-26447.118735,Cluster-26447.10933,Cluster-26447.102199,Cluster-26447.99447,Cluster-26447.75347,Cluster-26…
GO:0002831	regulation of response to biotic stimulus	biological_process	0.69394	1	1	966	148	126097	Cluster-26447.212720
GO:0016032	viral process	biological_process	0.69398	1	24	966	3090	126097	Cluster-26447.197869,Cluster-26447.164716,Cluster-26447.187623,Cluster-26447.122732,Cluster-26447.55901,Cluster-26447.157586,Cluster-26447.48972,Cluster-26447.33049,Cluster-26447.28590,Cluster-26447.147095,Cluster-26447.33592,Cluster-26447.12834,Cluster-26447.61385,Cluster-26447.179565,Cluster-26447.54173,Cluster-26447.86266,Cluster-26447.216958,Cluster-26447.48975,Cluster-26447.169437,Cluster-26…
GO:0006461	protein complex assembly	biological_process	0.69422	1	15	966	1989	126097	Cluster-26447.109529,Cluster-26447.46051,Cluster-26447.44224,Cluster-26447.46049,Cluster-26447.45997,Cluster-26447.34800,Cluster-26447.179322,Cluster-1298.0,Cluster-26447.110949,Cluster-26447.181330,Cluster-26447.131610,Cluster-26447.20884,Cluster-26447.13697,Cluster-26447.73778,Cluster-26447.93149
GO:0016830	carbon-carbon lyase activity	molecular_function	0.69424	1	7	966	1008	126097	Cluster-26447.1470,Cluster-26447.98682,Cluster-26447.216733,Cluster-26447.69158,Cluster-26447.149113,Cluster-26447.42104,Cluster-26447.8416
GO:0007009	plasma membrane organization	biological_process	0.69474	1	1	966	127	126097	Cluster-26447.123225
GO:0006721	terpenoid metabolic process	biological_process	0.6956	1	4	966	554	126097	Cluster-26447.123064,Cluster-26447.169437,Cluster-26447.103544,Cluster-26447.107517
GO:0016114	terpenoid biosynthetic process	biological_process	0.6956	1	4	966	554	126097	Cluster-26447.169437,Cluster-26447.103544,Cluster-26447.107517,Cluster-26447.123064
GO:0031329	regulation of cellular catabolic process	biological_process	0.69567	1	4	966	571	126097	Cluster-26447.73778,Cluster-26447.181330,Cluster-26447.99213,Cluster-26447.114984
GO:0030151	molybdenum ion binding	molecular_function	0.69721	1	1	966	143	126097	Cluster-26447.97798
GO:0009098	leucine biosynthetic process	biological_process	0.69928	1	1	966	130	126097	Cluster-26447.207435
GO:0045892	negative regulation of transcription, DNA-templated	biological_process	0.6994	1	2	966	284	126097	Cluster-26447.107816,Cluster-26447.107804
GO:0051253	negative regulation of RNA metabolic process	biological_process	0.6994	1	2	966	284	126097	Cluster-26447.107804,Cluster-26447.107816
GO:1902679	negative regulation of RNA biosynthetic process	biological_process	0.6994	1	2	966	284	126097	Cluster-26447.107804,Cluster-26447.107816
GO:1903507	negative regulation of nucleic acid-templated transcription	biological_process	0.6994	1	2	966	284	126097	Cluster-26447.107816,Cluster-26447.107804
GO:0051090	regulation of sequence-specific DNA binding transcription factor activity	biological_process	0.70233	1	1	966	106	126097	Cluster-26447.159813
GO:0016706	oxidoreductase activity, acting on paired donors, with incorporation or reduction of molecular oxygen, 2-oxoglutarate as one donor, and incorporation of one atom each of oxygen into both donors	molecular_function	0.70332	1	1	966	123	126097	Cluster-1202.1
GO:0043161	proteasome-mediated ubiquitin-dependent protein catabolic process	biological_process	0.70519	1	2	966	282	126097	Cluster-26447.114984,Cluster-26447.99213
GO:0000917	barrier septum assembly	biological_process	0.7052	1	3	966	464	126097	Cluster-26447.114984,Cluster-26447.142960,Cluster-26447.73778
GO:0032506	cytokinetic process	biological_process	0.7052	1	3	966	464	126097	Cluster-26447.114984,Cluster-26447.142960,Cluster-26447.73778
GO:0090529	cell septum assembly	biological_process	0.7052	1	3	966	464	126097	Cluster-26447.114984,Cluster-26447.142960,Cluster-26447.73778
GO:1902410	mitotic cytokinetic process	biological_process	0.7052	1	3	966	464	126097	Cluster-26447.142960,Cluster-26447.114984,Cluster-26447.73778
GO:0019222	regulation of metabolic process	biological_process	0.70526	1	108	966	13860	126097	Cluster-26447.163880,Cluster-26447.168299,Cluster-26447.38965,Cluster-26447.135888,Cluster-26447.63369,Cluster-26447.120301,Cluster-26447.81217,Cluster-26447.122713,Cluster-26447.127538,Cluster-26447.165515,Cluster-26447.118198,Cluster-26447.159650,Cluster-26447.4592,Cluster-26447.125048,Cluster-26447.75347,Cluster-26447.10459,Cluster-26447.205876,Cluster-26447.99827,Cluster-26447.22945,Cluster-2…
GO:0006570	tyrosine metabolic process	biological_process	0.70543	1	6	966	854	126097	Cluster-26447.108565,Cluster-26447.164902,Cluster-26447.98682,Cluster-26447.9012,Cluster-26447.1470,Cluster-26447.8416
GO:0045261	proton-transporting ATP synthase complex, catalytic core F(1)	cellular_component	0.70553	1	1	966	148	126097	Cluster-26447.120543
GO:0044423	virion part	cellular_component	0.70565	1	23	966	3038	126097	Cluster-26447.164929,Cluster-26447.127712,Cluster-26447.48975,Cluster-26447.48974,Cluster-26447.73778,Cluster-26447.82299,Cluster-26447.93958,Cluster-26447.107986,Cluster-26447.8177,Cluster-26447.204320,Cluster-26447.120331,Cluster-26447.48972,Cluster-26447.130688,Cluster-26447.216428,Cluster-26447.127700,Cluster-26447.10934,Cluster-26447.87881,Cluster-26447.157586,Cluster-26447.10933,Cluster-264…
GO:0015081	sodium ion transmembrane transporter activity	molecular_function	0.7058	1	2	966	296	126097	Cluster-26447.182885,Cluster-26447.158601
GO:0070271	protein complex biogenesis	biological_process	0.70585	1	15	966	2000	126097	Cluster-26447.93149,Cluster-26447.73778,Cluster-26447.13697,Cluster-26447.20884,Cluster-26447.181330,Cluster-26447.110949,Cluster-26447.131610,Cluster-1298.0,Cluster-26447.34800,Cluster-26447.179322,Cluster-26447.46049,Cluster-26447.45997,Cluster-26447.44224,Cluster-26447.109529,Cluster-26447.46051
GO:0072330	monocarboxylic acid biosynthetic process	biological_process	0.706	1	8	966	1145	126097	Cluster-26447.9847,Cluster-26447.112768,Cluster-26447.724,Cluster-26447.118735,Cluster-26447.127427,Cluster-26447.97817,Cluster-26447.98682,Cluster-26447.85633
GO:0032182	ubiquitin-like protein binding	molecular_function	0.70655	1	1	966	134	126097	Cluster-26447.115609
GO:0046903	secretion	biological_process	0.70881	1	5	966	656	126097	Cluster-26447.118800,Cluster-26447.83904,Cluster-26447.195148,Cluster-26447.33592,Cluster-26447.140126
GO:0004866	endopeptidase inhibitor activity	molecular_function	0.7102	1	2	966	301	126097	Cluster-26447.122456,Cluster-26447.75058
GO:0061135	endopeptidase regulator activity	molecular_function	0.7102	1	2	966	301	126097	Cluster-26447.122456,Cluster-26447.75058
GO:0032879	regulation of localization	biological_process	0.71028	1	2	966	303	126097	Cluster-26447.209390,Cluster-26447.75058
GO:0030474	spindle pole body duplication	biological_process	0.71134	1	1	966	126	126097	Cluster-26447.45997
GO:0051300	spindle pole body organization	biological_process	0.71134	1	1	966	126	126097	Cluster-26447.45997
GO:0022402	cell cycle process	biological_process	0.71221	1	13	966	1753	126097	Cluster-26447.135888,Cluster-26447.184773,Cluster-26447.73778,Cluster-26447.53906,Cluster-26447.142960,Cluster-26447.114984,Cluster-26447.73989,Cluster-26447.34800,Cluster-26447.45997,Cluster-26447.184774,Cluster-4869.0,Cluster-26447.99213,Cluster-26447.57455
GO:0045934	negative regulation of nucleobase-containing compound metabolic process	biological_process	0.71331	1	2	966	291	126097	Cluster-26447.107816,Cluster-26447.107804
GO:0006754	ATP biosynthetic process	biological_process	0.71368	1	3	966	486	126097	Cluster-26447.120543,Cluster-26447.10933,Cluster-26447.10934
GO:0005216	ion channel activity	molecular_function	0.71455	1	13	966	1750	126097	Cluster-26447.109208,Cluster-26447.107398,Cluster-26447.182885,Cluster-26447.200669,Cluster-26447.66120,Cluster-26447.56531,Cluster-26447.111541,Cluster-26447.117379,Cluster-26447.61385,Cluster-26447.113291,Cluster-30803.0,Cluster-26447.102118,Cluster-26447.44436
GO:0022838	substrate-specific channel activity	molecular_function	0.71455	1	13	966	1750	126097	Cluster-26447.109208,Cluster-26447.107398,Cluster-26447.182885,Cluster-26447.200669,Cluster-26447.66120,Cluster-26447.111541,Cluster-26447.56531,Cluster-26447.117379,Cluster-26447.61385,Cluster-30803.0,Cluster-26447.113291,Cluster-26447.102118,Cluster-26447.44436
GO:0000281	mitotic cytokinesis	biological_process	0.71524	1	3	966	472	126097	Cluster-26447.114984,Cluster-26447.142960,Cluster-26447.73778
GO:0061640	cytoskeleton-dependent cytokinesis	biological_process	0.71524	1	3	966	472	126097	Cluster-26447.142960,Cluster-26447.114984,Cluster-26447.73778
GO:0008380	RNA splicing	biological_process	0.71528	1	4	966	583	126097	Cluster-26447.58618,Cluster-26447.113691,Cluster-26447.146700,Cluster-26447.73778
GO:0033179	proton-transporting V-type ATPase, V0 domain	cellular_component	0.71549	1	2	966	270	126097	Cluster-26447.114984,Cluster-26447.163186
GO:0016874	ligase activity	molecular_function	0.71605	1	15	966	2001	126097	Cluster-26447.724,Cluster-26447.87637,Cluster-26447.113937,Cluster-26447.146217,Cluster-26447.140660,Cluster-26447.63553,Cluster-26447.207435,Cluster-26447.113791,Cluster-26447.200419,Cluster-26447.110123,Cluster-26447.115264,Cluster-26447.200422,Cluster-26447.103544,Cluster-26447.209963,Cluster-26447.105
GO:0016052	carbohydrate catabolic process	biological_process	0.71669	1	5	966	817	126097	Cluster-26447.108565,Cluster-26447.135625,Cluster-26447.109344,Cluster-26447.135627,Cluster-26447.109407
GO:0006505	GPI anchor metabolic process	biological_process	0.71684	1	4	966	545	126097	Cluster-26447.28828,Cluster-26447.99255,Cluster-26447.167496,Cluster-26447.13906
GO:0019751	polyol metabolic process	biological_process	0.71897	1	2	966	363	126097	Cluster-26447.155828,Cluster-26447.115578
GO:0015629	actin cytoskeleton	cellular_component	0.71898	1	3	966	427	126097	Cluster-26447.34800,Cluster-26447.190134,Cluster-26447.9136
GO:0007218	neuropeptide signaling pathway	biological_process	0.71934	1	2	966	290	126097	Cluster-26447.170899,Cluster-26447.19284
GO:0009288	bacterial-type flagellum	cellular_component	0.71946	1	1	966	148	126097	Cluster-26447.114984
GO:0031347	regulation of defense response	biological_process	0.72064	1	1	966	161	126097	Cluster-26447.212720
GO:0016702	oxidoreductase activity, acting on single donors with incorporation of molecular oxygen, incorporation of two atoms of oxygen	molecular_function	0.72138	1	2	966	355	126097	Cluster-26447.176793,Cluster-26447.63027
GO:0005402	cation:sugar symporter activity	molecular_function	0.72209	1	1	966	145	126097	Cluster-26447.152478
GO:0051213	dioxygenase activity	molecular_function	0.72214	1	3	966	481	126097	Cluster-1202.1,Cluster-26447.63027,Cluster-26447.176793
GO:0044093	positive regulation of molecular function	biological_process	0.72292	1	1	966	158	126097	Cluster-26447.26693
GO:0009894	regulation of catabolic process	biological_process	0.7241	1	4	966	594	126097	Cluster-26447.73778,Cluster-26447.114984,Cluster-26447.181330,Cluster-26447.99213
GO:0016798	hydrolase activity, acting on glycosyl bonds	molecular_function	0.72471	1	18	966	2489	126097	Cluster-26447.135627,Cluster-26447.115151,Cluster-26447.74891,Cluster-26447.191833,Cluster-26447.6629,Cluster-26447.211581,Cluster-26447.186119,Cluster-26447.26075,Cluster-26202.0,Cluster-26447.162961,Cluster-26447.113691,Cluster-26447.26073,Cluster-26447.135625,Cluster-26447.181649,Cluster-26447.186121,Cluster-26447.120331,Cluster-26447.107535,Cluster-2688.5
GO:0008839	4-hydroxy-tetrahydrodipicolinate reductase	molecular_function	0.72549	1	1	966	156	126097	Cluster-26447.44385
GO:0043650	dicarboxylic acid biosynthetic process	biological_process	0.72551	1	2	966	319	126097	Cluster-26447.113672,Cluster-26447.58690
GO:0048468	cell development	biological_process	0.7256	1	3	966	496	126097	Cluster-26447.216685,Cluster-26447.208563,Cluster-26447.9136
GO:0006497	protein lipidation	biological_process	0.72631	1	2	966	278	126097	Cluster-26447.99255,Cluster-26447.28828
GO:0006506	GPI anchor biosynthetic process	biological_process	0.72631	1	2	966	278	126097	Cluster-26447.28828,Cluster-26447.99255
GO:0006661	phosphatidylinositol biosynthetic process	biological_process	0.72631	1	2	966	278	126097	Cluster-26447.28828,Cluster-26447.99255
GO:0010639	negative regulation of organelle organization	biological_process	0.72742	1	2	966	298	126097	Cluster-26447.114984,Cluster-26447.99213
GO:0071555	cell wall organization	biological_process	0.72778	1	1	966	154	126097	Cluster-26447.173733
GO:0009101	glycoprotein biosynthetic process	biological_process	0.7279	1	4	966	597	126097	Cluster-26447.13906,Cluster-26447.44436,Cluster-26447.194966,Cluster-26447.63019
GO:0051119	sugar transmembrane transporter activity	molecular_function	0.7283	1	1	966	147	126097	Cluster-26447.152478
GO:0009896	positive regulation of catabolic process	biological_process	0.72899	1	2	966	333	126097	Cluster-26447.73778,Cluster-26447.181330
GO:0010508	positive regulation of autophagy	biological_process	0.72899	1	2	966	333	126097	Cluster-26447.73778,Cluster-26447.181330
GO:0031331	positive regulation of cellular catabolic process	biological_process	0.72899	1	2	966	333	126097	Cluster-26447.73778,Cluster-26447.181330
GO:0042158	lipoprotein biosynthetic process	biological_process	0.72912	1	2	966	281	126097	Cluster-26447.99255,Cluster-26447.28828
GO:0051259	protein oligomerization	biological_process	0.72951	1	2	966	327	126097	Cluster-26447.110949,Cluster-26447.73778
GO:0006664	glycolipid metabolic process	biological_process	0.72967	1	7	966	934	126097	Cluster-26447.41274,Cluster-26447.90686,Cluster-26447.13906,Cluster-26447.121272,Cluster-26447.28828,Cluster-26447.167496,Cluster-26447.99255
GO:0042967	acyl-carrier-protein biosynthetic process	biological_process	0.72987	1	7	966	997	126097	Cluster-26447.46051,Cluster-8641.3,Cluster-26447.140493,Cluster-26447.46049,Cluster-26447.67834,Cluster-26447.138049,Cluster-26447.55740
GO:0042157	lipoprotein metabolic process	biological_process	0.72991	1	3	966	447	126097	Cluster-26447.181330,Cluster-26447.99255,Cluster-26447.28828
GO:0031399	regulation of protein modification process	biological_process	0.73116	1	3	966	459	126097	Cluster-26447.163186,Cluster-26447.114984,Cluster-26447.99213
GO:0009072	aromatic amino acid family metabolic process	biological_process	0.73222	1	9	966	1285	126097	Cluster-26447.1470,Cluster-26447.9012,Cluster-26447.108565,Cluster-26447.112768,Cluster-26447.9847,Cluster-26447.8416,Cluster-26447.98682,Cluster-26447.164902,Cluster-26447.724
GO:0015267	channel activity	molecular_function	0.73271	1	13	966	1774	126097	Cluster-26447.200669,Cluster-26447.182885,Cluster-26447.107398,Cluster-26447.109208,Cluster-26447.44436,Cluster-26447.102118,Cluster-30803.0,Cluster-26447.113291,Cluster-26447.61385,Cluster-26447.56531,Cluster-26447.117379,Cluster-26447.111541,Cluster-26447.66120
GO:0022803	passive transmembrane transporter activity	molecular_function	0.73271	1	13	966	1774	126097	Cluster-30803.0,Cluster-26447.113291,Cluster-26447.61385,Cluster-26447.111541,Cluster-26447.56531,Cluster-26447.117379,Cluster-26447.66120,Cluster-26447.44436,Cluster-26447.102118,Cluster-26447.182885,Cluster-26447.107398,Cluster-26447.109208,Cluster-26447.200669
GO:0019748	secondary metabolic process	biological_process	0.73332	1	2	966	322	126097	Cluster-26447.67052,Cluster-26447.70648
GO:0015297	antiporter activity	molecular_function	0.73411	1	3	966	467	126097	Cluster-26447.105501,Cluster-26447.182885,Cluster-16727.6
GO:0032501	multicellular organismal process	biological_process	0.73481	1	23	966	3088	126097	Cluster-26447.111493,Cluster-26447.181705,Cluster-26447.216685,Cluster-26447.190892,Cluster-26447.9136,Cluster-26447.191579,Cluster-26447.148206,Cluster-26447.75058,Cluster-26447.65262,Cluster-26447.50022,Cluster-26447.123882,Cluster-26447.44385,Cluster-26447.1908,Cluster-26447.208563,Cluster-26447.46051,Cluster-26447.46049,Cluster-26447.564,Cluster-26447.201669,Cluster-27210.2,Cluster-26447.1735…
GO:0010498	proteasomal protein catabolic process	biological_process	0.73739	1	2	966	299	126097	Cluster-26447.99213,Cluster-26447.114984
GO:0044802	single-organism membrane organization	biological_process	0.739	1	7	966	1007	126097	Cluster-26447.65687,Cluster-26447.125274,Cluster-26447.121926,Cluster-26447.123225,Cluster-26447.184313,Cluster-26447.43983,Cluster-26447.120306
GO:0005635	nuclear envelope	cellular_component	0.74066	1	1	966	168	126097	Cluster-26447.9408
GO:0015291	secondary active transmembrane transporter activity	molecular_function	0.74082	1	5	966	723	126097	Cluster-26447.152478,Cluster-26447.182885,Cluster-26447.105501,Cluster-26447.158601,Cluster-16727.6
GO:0004127	cytidylate kinase activity	molecular_function	0.74098	1	1	966	157	126097	Cluster-26447.159125
GO:0000279	M phase	biological_process	0.74118	1	1	966	145	126097	Cluster-26447.34800
GO:0022403	cell cycle phase	biological_process	0.74118	1	1	966	145	126097	Cluster-26447.34800
GO:0044848	biological phase	biological_process	0.74118	1	1	966	145	126097	Cluster-26447.34800
GO:0000375	RNA splicing, via transesterification reactions	biological_process	0.74151	1	3	966	472	126097	Cluster-26447.73778,Cluster-26447.113691,Cluster-26447.58618
GO:0061024	membrane organization	biological_process	0.74166	1	8	966	1156	126097	Cluster-26447.121926,Cluster-26447.123225,Cluster-26447.184313,Cluster-26447.43983,Cluster-26447.120306,Cluster-26447.157586,Cluster-26447.125274,Cluster-26447.65687
GO:0006305	DNA alkylation	biological_process	0.74367	1	1	966	146	126097	Cluster-26447.4592
GO:0006306	DNA methylation	biological_process	0.74367	1	1	966	146	126097	Cluster-26447.4592
GO:0044728	DNA methylation or demethylation	biological_process	0.74367	1	1	966	146	126097	Cluster-26447.4592
GO:0009084	glutamine family amino acid biosynthetic process	biological_process	0.74372	1	1	966	206	126097	Cluster-26447.48824
GO:0030234	enzyme regulator activity	molecular_function	0.74401	1	15	966	2091	126097	Cluster-26447.74407,Cluster-26447.32109,Cluster-26447.130453,Cluster-26447.63369,Cluster-26447.216958,Cluster-26447.26693,Cluster-26447.120607,Cluster-26447.68826,Cluster-26447.33592,Cluster-26447.65262,Cluster-26447.53906,Cluster-26447.160775,Cluster-26447.75058,Cluster-26447.122456,Cluster-26447.135888
GO:0016758	transferase activity, transferring hexosyl groups	molecular_function	0.74487	1	15	966	1995	126097	Cluster-26447.59916,Cluster-4869.0,Cluster-31356.0,Cluster-26447.181772,Cluster-26447.38377,Cluster-26447.121272,Cluster-26447.181533,Cluster-26447.121612,Cluster-20407.0,Cluster-26447.107986,Cluster-26447.194966,Cluster-26447.13906,Cluster-26447.85635,Cluster-26447.107804,Cluster-26447.99255
GO:0006119	oxidative phosphorylation	biological_process	0.74565	1	8	966	1189	126097	Cluster-26447.96780,Cluster-26447.37937,Cluster-26447.99447,Cluster-26447.181385,Cluster-26447.142960,Cluster-26447.120543,Cluster-26447.84141,Cluster-26447.99074
GO:0019783	ubiquitin-like protein-specific protease activity	molecular_function	0.74655	1	1	966	157	126097	Cluster-26447.12834
GO:0003779	actin binding	molecular_function	0.74721	1	16	966	2234	126097	Cluster-26447.50022,Cluster-26447.68963,Cluster-26447.107198,Cluster-26447.205786,Cluster-26447.65290,Cluster-26447.120331,Cluster-26447.44224,Cluster-26447.148230,Cluster-26447.169634,Cluster-26447.132313,Cluster-26447.52943,Cluster-26447.133329,Cluster-26447.57851,Cluster-26447.70648,Cluster-26447.122456,Cluster-26447.724
GO:0005874	microtubule	cellular_component	0.74863	1	3	966	426	126097	Cluster-26447.34800,Cluster-26447.184773,Cluster-26447.184774
GO:0042030	ATPase inhibitor activity	molecular_function	0.74873	1	1	966	173	126097	Cluster-26447.63369
GO:0006805	xenobiotic metabolic process	biological_process	0.74925	1	2	966	300	126097	Cluster-26447.9012,Cluster-26447.197288
GO:0009410	response to xenobiotic stimulus	biological_process	0.74925	1	2	966	300	126097	Cluster-26447.197288,Cluster-26447.9012
GO:0071466	cellular response to xenobiotic stimulus	biological_process	0.74925	1	2	966	300	126097	Cluster-26447.197288,Cluster-26447.9012
GO:0000902	cell morphogenesis	biological_process	0.75041	1	3	966	412	126097	Cluster-26447.135875,Cluster-26447.216685,Cluster-26447.208563
GO:0032989	cellular component morphogenesis	biological_process	0.75041	1	3	966	412	126097	Cluster-26447.135875,Cluster-26447.208563,Cluster-26447.216685
GO:0009142	nucleoside triphosphate biosynthetic process	biological_process	0.75145	1	3	966	529	126097	Cluster-26447.120543,Cluster-26447.10934,Cluster-26447.10933
GO:0009145	purine nucleoside triphosphate biosynthetic process	biological_process	0.75145	1	3	966	529	126097	Cluster-26447.10934,Cluster-26447.10933,Cluster-26447.120543
GO:0009201	ribonucleoside triphosphate biosynthetic process	biological_process	0.75145	1	3	966	529	126097	Cluster-26447.10934,Cluster-26447.10933,Cluster-26447.120543
GO:0009206	purine ribonucleoside triphosphate biosynthetic process	biological_process	0.75145	1	3	966	529	126097	Cluster-26447.120543,Cluster-26447.10934,Cluster-26447.10933
GO:0006835	dicarboxylic acid transport	biological_process	0.75166	1	1	966	151	126097	Cluster-26447.158601
GO:0006643	membrane lipid metabolic process	biological_process	0.75284	1	7	966	958	126097	Cluster-26447.167496,Cluster-26447.99255,Cluster-26447.28828,Cluster-26447.121272,Cluster-26447.13906,Cluster-26447.41274,Cluster-26447.90686
GO:1902494	catalytic complex	cellular_component	0.753	1	58	966	7427	126097	Cluster-26447.22371,Cluster-26447.115132,Cluster-26447.111620,Cluster-26447.205794,Cluster-26447.207851,Cluster-26447.107804,Cluster-26447.203505,Cluster-26447.22355,Cluster-26447.165876,Cluster-26447.111493,Cluster-2195.0,Cluster-26447.158588,Cluster-26447.24030,Cluster-26447.58799,Cluster-26447.212926,Cluster-26447.73778,Cluster-26447.10621,Cluster-26447.53906,Cluster-26447.69821,Cluster-26447.…
GO:0019899	enzyme binding	molecular_function	0.75417	1	4	966	545	126097	Cluster-26447.34800,Cluster-26447.85635,Cluster-26447.158690,Cluster-26447.99213
GO:0050794	regulation of cellular process	biological_process	0.75565	1	170	966	21795	126097	Cluster-26447.164902,Cluster-26447.29217,Cluster-26447.123161,Cluster-26447.158588,Cluster-26447.154204,Cluster-26447.122732,Cluster-9264.0,Cluster-26447.44385,Cluster-26447.211242,Cluster-26447.204182,Cluster-26447.102118,Cluster-26447.208563,Cluster-26447.13725,Cluster-26447.85837,Cluster-26447.159813,Cluster-26447.33127,Cluster-12330.0,Cluster-26447.13031,Cluster-26447.85601,Cluster-26447.3304…
GO:0006913	nucleocytoplasmic transport	biological_process	0.75739	1	3	966	457	126097	Cluster-26447.73778,Cluster-26447.55764,Cluster-26447.26715
GO:0019953	sexual reproduction	biological_process	0.75742	1	5	966	798	126097	Cluster-26447.46051,Cluster-26447.190892,Cluster-26447.46049,Cluster-26447.163880,Cluster-26447.85601
GO:0098772	molecular function regulator	molecular_function	0.7584	1	21	966	2835	126097	Cluster-26447.84540,Cluster-26447.65262,Cluster-26447.33592,Cluster-26447.160775,Cluster-26447.75058,Cluster-26447.3892,Cluster-26447.205218,Cluster-26447.141384,Cluster-26447.68826,Cluster-26447.216685,Cluster-26447.130453,Cluster-26447.135888,Cluster-26447.122456,Cluster-26447.53906,Cluster-26447.120607,Cluster-26447.74407,Cluster-26447.32109,Cluster-26447.63369,Cluster-26447.106238,Cluster-264…
GO:0005777	peroxisome	cellular_component	0.75961	1	1	966	194	126097	Cluster-26447.135732
GO:0042579	microbody	cellular_component	0.75961	1	1	966	194	126097	Cluster-26447.135732
GO:0009523	photosystem II	cellular_component	0.76055	1	4	966	760	126097	Cluster-26447.106016,Cluster-26447.143611,Cluster-26447.158588,Cluster-26447.120346
GO:0043228	non-membrane-bounded organelle	cellular_component	0.76135	1	81	966	10759	126097	Cluster-26447.159650,Cluster-26447.118198,Cluster-26447.160118,Cluster-26447.141736,Cluster-26447.135888,Cluster-26447.159203,Cluster-26447.172844,Cluster-26447.135875,Cluster-26447.207639,Cluster-26447.28276,Cluster-26447.65064,Cluster-26447.133824,Cluster-26447.120306,Cluster-26447.91564,Cluster-26447.44224,Cluster-26447.184773,Cluster-26447.9136,Cluster-26447.62499,Cluster-26447.181649,Cluster…
GO:0046474	glycerophospholipid biosynthetic process	biological_process	0.76159	1	2	966	299	126097	Cluster-26447.28828,Cluster-26447.99255
GO:0042451	purine nucleoside biosynthetic process	biological_process	0.76187	1	4	966	688	126097	Cluster-26447.120543,Cluster-26447.10934,Cluster-26447.118735,Cluster-26447.10933
GO:0046129	purine ribonucleoside biosynthetic process	biological_process	0.76187	1	4	966	688	126097	Cluster-26447.120543,Cluster-26447.10933,Cluster-26447.118735,Cluster-26447.10934
GO:0005887	integral component of plasma membrane	cellular_component	0.76237	1	6	966	930	126097	Cluster-26447.94903,Cluster-31356.0,Cluster-26447.22371,Cluster-26447.66517,Cluster-26447.56531,Cluster-26447.66120
GO:0006554	lysine catabolic process	biological_process	0.76243	1	4	966	590	126097	Cluster-26447.9847,Cluster-26447.724,Cluster-26447.112768,Cluster-26447.98682
GO:0009068	aspartate family amino acid catabolic process	biological_process	0.76243	1	4	966	590	126097	Cluster-26447.724,Cluster-26447.9847,Cluster-26447.98682,Cluster-26447.112768
GO:0040029	regulation of gene expression, epigenetic	biological_process	0.76271	1	1	966	154	126097	Cluster-26447.4592
GO:0006771	riboflavin metabolic process	biological_process	0.76408	1	2	966	338	126097	Cluster-26447.197288,Cluster-26447.162961
GO:0042726	flavin-containing compound metabolic process	biological_process	0.76408	1	2	966	338	126097	Cluster-26447.197288,Cluster-26447.162961
GO:0000228	nuclear chromosome	cellular_component	0.76411	1	5	966	730	126097	Cluster-26447.48330,Cluster-26447.184773,Cluster-26447.135888,Cluster-26447.48334,Cluster-26447.184774
GO:0044403	symbiosis, encompassing mutualism through parasitism	biological_process	0.7644	1	26	966	3438	126097	Cluster-26447.187623,Cluster-26447.197869,Cluster-26447.164716,Cluster-26447.157586,Cluster-26447.55901,Cluster-26447.122732,Cluster-26447.28590,Cluster-26447.147095,Cluster-26447.33049,Cluster-26447.48972,Cluster-26447.83472,Cluster-26447.33592,Cluster-26447.54173,Cluster-26447.179565,Cluster-26447.12834,Cluster-26447.61385,Cluster-26447.216958,Cluster-26447.125593,Cluster-26447.86266,Cluster-26…
GO:0009100	glycoprotein metabolic process	biological_process	0.76465	1	4	966	624	126097	Cluster-26447.63019,Cluster-26447.194966,Cluster-26447.13906,Cluster-26447.44436
GO:0030031	cell projection assembly	biological_process	0.76558	1	1	966	152	126097	Cluster-26447.166844
GO:0008138	protein tyrosine/serine/threonine phosphatase activity	molecular_function	0.76701	1	1	966	182	126097	Cluster-26447.175970
GO:0043232	intracellular non-membrane-bounded organelle	cellular_component	0.76712	1	80	966	10657	126097	Cluster-26447.140820,Cluster-2195.0,Cluster-26447.122861,Cluster-26447.29217,Cluster-26447.140660,Cluster-26447.9447,Cluster-26447.144646,Cluster-26447.205794,Cluster-26447.111620,Cluster-26447.99294,Cluster-26447.174995,Cluster-26447.184774,Cluster-26447.67743,Cluster-26447.129937,Cluster-26447.190134,Cluster-26447.30797,Cluster-26447.181330,Cluster-26447.42104,Cluster-26447.45139,Cluster-26447.…
GO:0004177	aminopeptidase activity	molecular_function	0.76739	1	1	966	173	126097	Cluster-26447.130194
GO:0000155	phosphorelay sensor kinase activity	molecular_function	0.76795	1	2	966	293	126097	Cluster-26447.79310,Cluster-26447.137118
GO:0006816	calcium ion transport	biological_process	0.76912	1	3	966	533	126097	Cluster-26447.44436,Cluster-26447.209390,Cluster-26447.182885
GO:0046915	transition metal ion transmembrane transporter activity	molecular_function	0.76931	1	4	966	625	126097	Cluster-26447.125377,Cluster-26447.2402,Cluster-26447.48330,Cluster-26447.48334
GO:0008378	galactosyltransferase activity	molecular_function	0.7698	1	1	966	171	126097	Cluster-26447.194966
GO:0030684	preribosome	cellular_component	0.76987	1	3	966	453	126097	Cluster-26447.45949,Cluster-26447.155419,Cluster-26447.53906
GO:0003712	transcription cofactor activity	molecular_function	0.76991	1	6	966	955	126097	Cluster-26447.117280,Cluster-26447.93222,Cluster-26447.107160,Cluster-26447.142960,Cluster-26447.40614,Cluster-26447.52385
GO:0044877	macromolecular complex binding	molecular_function	0.77118	1	11	966	1632	126097	Cluster-26447.117280,Cluster-26447.156505,Cluster-26447.123519,Cluster-26447.34800,Cluster-26447.113291,Cluster-26447.67743,Cluster-26447.133824,Cluster-26447.156490,Cluster-26447.129960,Cluster-26447.111620,Cluster-26447.133826
GO:0044419	interspecies interaction between organisms	biological_process	0.77185	1	26	966	3453	126097	Cluster-26447.54173,Cluster-26447.12834,Cluster-26447.61385,Cluster-26447.179565,Cluster-26447.125593,Cluster-26447.216958,Cluster-26447.86266,Cluster-26447.122456,Cluster-26447.169437,Cluster-26447.82299,Cluster-26447.48974,Cluster-26447.48975,Cluster-26447.164857,Cluster-26447.197252,Cluster-26447.197869,Cluster-26447.164716,Cluster-26447.187623,Cluster-26447.55901,Cluster-26447.157586,Cluster-…
GO:0045229	external encapsulating structure organization	biological_process	0.77246	1	1	966	173	126097	Cluster-26447.173733
GO:0009123	nucleoside monophosphate metabolic process	biological_process	0.77253	1	17	966	2570	126097	Cluster-26447.108565,Cluster-26447.96780,Cluster-26447.37937,Cluster-26447.181385,Cluster-26447.142960,Cluster-26447.204182,Cluster-26447.99074,Cluster-26447.84141,Cluster-26447.100182,Cluster-26447.99447,Cluster-26447.109407,Cluster-26447.75347,Cluster-26447.120543,Cluster-26447.109344,Cluster-26447.165528,Cluster-26447.10933,Cluster-26447.10934
GO:0016788	hydrolase activity, acting on ester bonds	molecular_function	0.77321	1	39	966	5153	126097	Cluster-26447.86173,Cluster-26447.107555,Cluster-26447.166844,Cluster-26447.165515,Cluster-26447.91562,Cluster-26447.119064,Cluster-26447.159125,Cluster-26447.124429,Cluster-26447.58690,Cluster-26447.86326,Cluster-26447.135089,Cluster-26447.120306,Cluster-26447.158601,Cluster-26447.132750,Cluster-969.1,Cluster-26447.91564,Cluster-26447.3666,Cluster-26447.167496,Cluster-26447.114984,Cluster-26447.…
GO:0050789	regulation of biological process	biological_process	0.77335	1	178	966	22860	126097	Cluster-26447.127538,Cluster-26447.165515,Cluster-26447.159650,Cluster-26447.120301,Cluster-31356.0,Cluster-26447.135888,Cluster-26447.168299,Cluster-26447.183831,Cluster-26447.87881,Cluster-26447.46077,Cluster-26447.205876,Cluster-26447.62499,Cluster-26447.100182,Cluster-26447.10814,Cluster-26447.75347,Cluster-26447.125048,Cluster-26447.166736,Cluster-26447.73989,Cluster-26447.137118,Cluster-264…
GO:0000989	transcription factor activity, transcription factor binding	molecular_function	0.77375	1	6	966	958	126097	Cluster-26447.93222,Cluster-26447.117280,Cluster-26447.142960,Cluster-26447.107160,Cluster-26447.40614,Cluster-26447.52385
GO:0050840	extracellular matrix binding	molecular_function	0.77436	1	1	966	195	126097	Cluster-26447.173733
GO:0005262	calcium channel activity	molecular_function	0.77456	1	2	966	381	126097	Cluster-26447.182885,Cluster-26447.44436
GO:0016628	oxidoreductase activity, acting on the CH-CH group of donors, NAD or NADP as acceptor	molecular_function	0.7747	1	2	966	358	126097	Cluster-26447.112768,Cluster-26447.44385
GO:0071949	FAD binding	molecular_function	0.77505	1	2	966	345	126097	Cluster-26447.123064,Cluster-26447.9847
GO:1903509	liposaccharide metabolic process	biological_process	0.77517	1	7	966	993	126097	Cluster-26447.90686,Cluster-26447.41274,Cluster-26447.13906,Cluster-26447.121272,Cluster-26447.28828,Cluster-26447.99255,Cluster-26447.167496
GO:0006023	aminoglycan biosynthetic process	biological_process	0.77529	1	2	966	336	126097	Cluster-26447.115264,Cluster-26447.59916
GO:0015886	heme transport	biological_process	0.77683	1	1	966	172	126097	Cluster-1298.0
GO:1901678	iron coordination entity transport	biological_process	0.77683	1	1	966	172	126097	Cluster-1298.0
GO:0019637	organophosphate metabolic process	biological_process	0.77684	1	40	966	5583	126097	Cluster-26447.84141,Cluster-26447.204182,Cluster-26447.99074,Cluster-26447.153858,Cluster-26447.109452,Cluster-26447.85633,Cluster-26447.69821,Cluster-26447.96780,Cluster-26447.10934,Cluster-26447.118735,Cluster-26447.155043,Cluster-26447.197774,Cluster-26447.165528,Cluster-26447.109344,Cluster-26447.121272,Cluster-26447.155054,Cluster-26447.109407,Cluster-26447.99447,Cluster-26447.28828,Cluster-…
GO:0005669	transcription factor TFIID complex	cellular_component	0.77713	1	1	966	163	126097	Cluster-26447.3666
GO:0004803	transposase activity	molecular_function	0.77854	1	2	966	303	126097	Cluster-26447.173983,Cluster-26447.74952
GO:0006813	potassium ion transport	biological_process	0.77867	1	9	966	1320	126097	Cluster-26447.66120,Cluster-26447.105501,Cluster-26447.164912,Cluster-26447.66043,Cluster-26447.22371,Cluster-26447.66517,Cluster-26447.140126,Cluster-26447.207713,Cluster-26447.11686
GO:0009311	oligosaccharide metabolic process	biological_process	0.77876	1	10	966	1377	126097	Cluster-26447.107804,Cluster-26447.135625,Cluster-26447.85635,Cluster-26447.135627,Cluster-26447.173733,Cluster-26447.107986,Cluster-26447.121272,Cluster-26447.125593,Cluster-26447.35100,Cluster-26447.90686
GO:0044767	single-organism developmental process	biological_process	0.77924	1	16	966	2183	126097	Cluster-26447.159084,Cluster-27210.2,Cluster-26447.173511,Cluster-26447.564,Cluster-26447.135875,Cluster-26447.208563,Cluster-26447.56531,Cluster-26447.75058,Cluster-26447.123882,Cluster-26447.50022,Cluster-26447.9136,Cluster-26447.166543,Cluster-26447.216685,Cluster-26447.173016,Cluster-26447.111493,Cluster-26447.181705
GO:0000003	reproduction	biological_process	0.77936	1	10	966	1503	126097	Cluster-26447.46051,Cluster-26447.190892,Cluster-26447.46049,Cluster-26447.85601,Cluster-26447.56531,Cluster-26447.114984,Cluster-26447.159084,Cluster-26447.163880,Cluster-26447.142960,Cluster-26447.73778
GO:0071705	nitrogen compound transport	biological_process	0.7806	1	8	966	1160	126097	Cluster-26447.76180,Cluster-26447.119868,Cluster-26447.149497,Cluster-26447.84540,Cluster-26447.9447,Cluster-26447.158601,Cluster-1298.0,Cluster-26447.166736
GO:0016709	oxidoreductase activity, acting on paired donors, with incorporation or reduction of molecular oxygen, NAD(P)H as one donor, and incorporation of one atom of oxygen	molecular_function	0.78078	1	1	966	172	126097	Cluster-26447.185494
GO:0042802	identical protein binding	molecular_function	0.78179	1	6	966	848	126097	Cluster-26447.135888,Cluster-26447.73778,Cluster-26447.52385,Cluster-26447.84716,Cluster-26447.46051,Cluster-26447.46049
GO:0031012	extracellular matrix	cellular_component	0.78212	1	3	966	543	126097	Cluster-26447.125216,Cluster-26447.170430,Cluster-26447.91239
GO:0045735	nutrient reservoir activity	molecular_function	0.78284	1	1	966	189	126097	Cluster-26447.51710
GO:0006323	DNA packaging	biological_process	0.78399	1	2	966	386	126097	Cluster-26447.53906,Cluster-26447.204734
GO:0006633	fatty acid biosynthetic process	biological_process	0.78455	1	5	966	815	126097	Cluster-26447.112768,Cluster-26447.85633,Cluster-26447.98682,Cluster-26447.9847,Cluster-26447.724
GO:0032101	regulation of response to external stimulus	biological_process	0.78502	1	1	966	201	126097	Cluster-26447.212720
GO:0005875	microtubule associated complex	cellular_component	0.78527	1	3	966	468	126097	Cluster-26447.46051,Cluster-26447.46049,Cluster-26447.73778
GO:0006013	mannose metabolic process	biological_process	0.78532	1	3	966	586	126097	Cluster-26447.109407,Cluster-26447.120331,Cluster-26447.109344
GO:0006022	aminoglycan metabolic process	biological_process	0.78541	1	4	966	601	126097	Cluster-26447.115264,Cluster-26447.122456,Cluster-26447.160578,Cluster-26447.59916
GO:0019835	cytolysis	biological_process	0.78572	1	1	966	171	126097	Cluster-26447.83472
GO:0000278	mitotic cell cycle	biological_process	0.78618	1	6	966	961	126097	Cluster-26447.142960,Cluster-26447.53906,Cluster-26447.99213,Cluster-26447.114984,Cluster-26447.34800,Cluster-26447.73778
GO:1903047	mitotic cell cycle process	biological_process	0.78618	1	6	966	961	126097	Cluster-26447.73778,Cluster-26447.34800,Cluster-26447.99213,Cluster-26447.114984,Cluster-26447.142960,Cluster-26447.53906
GO:0006352	DNA-templated transcription, initiation	biological_process	0.78986	1	6	966	968	126097	Cluster-26447.172340,Cluster-26447.58799,Cluster-26447.159813,Cluster-26447.3666,Cluster-26447.204734,Cluster-26447.115609
GO:1902582	single-organism intracellular transport	biological_process	0.79054	1	17	966	2439	126097	Cluster-26447.12529,Cluster-20433.0,Cluster-26447.55764,Cluster-26447.43676,Cluster-26447.48978,Cluster-26447.73778,Cluster-26447.120306,Cluster-26447.9095,Cluster-26447.184313,Cluster-26447.43983,Cluster-26447.121926,Cluster-26447.107535,Cluster-26447.125274,Cluster-26447.84191,Cluster-26447.35196,Cluster-26447.26715,Cluster-26447.65687
GO:0009636	response to toxic substance	biological_process	0.79088	1	1	966	181	126097	Cluster-26447.11686
GO:0044427	chromosomal part	cellular_component	0.79104	1	24	966	3179	126097	Cluster-26447.159203,Cluster-26447.28276,Cluster-26447.65064,Cluster-26447.48330,Cluster-26447.135888,Cluster-26447.209279,Cluster-26447.133826,Cluster-26447.53906,Cluster-26447.129960,Cluster-26447.204617,Cluster-26447.113291,Cluster-26447.184774,Cluster-26447.111620,Cluster-26447.205794,Cluster-26447.184773,Cluster-26447.48334,Cluster-26447.58449,Cluster-26447.34800,Cluster-26447.120306,Cluster…
GO:0033865	nucleoside bisphosphate metabolic process	biological_process	0.79133	1	1	966	182	126097	Cluster-26447.118735
GO:0033875	ribonucleoside bisphosphate metabolic process	biological_process	0.79133	1	1	966	182	126097	Cluster-26447.118735
GO:0034032	purine nucleoside bisphosphate metabolic process	biological_process	0.79133	1	1	966	182	126097	Cluster-26447.118735
GO:0005215	transporter activity	molecular_function	0.79163	1	75	966	9807	126097	Cluster-26447.140126,Cluster-26447.84250,Cluster-26447.163186,Cluster-16727.6,Cluster-26447.149497,Cluster-26447.2402,Cluster-26447.10934,Cluster-26447.67906,Cluster-26447.59987,Cluster-26447.66120,Cluster-26447.105501,Cluster-26447.69821,Cluster-26447.129949,Cluster-26447.11686,Cluster-26447.73778,Cluster-26447.27365,Cluster-26447.41840,Cluster-26447.87175,Cluster-26447.67905,Cluster-26447.79310…
GO:0007283	spermatogenesis	biological_process	0.79224	1	1	966	209	126097	Cluster-26447.190892
GO:0048232	male gamete generation	biological_process	0.79224	1	1	966	209	126097	Cluster-26447.190892
GO:0004867	serine-type endopeptidase inhibitor activity	molecular_function	0.79472	1	1	966	187	126097	Cluster-26447.122456
GO:0000226	microtubule cytoskeleton organization	biological_process	0.79497	1	6	966	873	126097	Cluster-26447.45997,Cluster-26447.44224,Cluster-26447.184774,Cluster-26447.34800,Cluster-26447.135888,Cluster-26447.184773
GO:0006006	glucose metabolic process	biological_process	0.79549	1	5	966	917	126097	Cluster-26447.109407,Cluster-26447.60729,Cluster-26447.109452,Cluster-26447.109344,Cluster-26447.108565
GO:0015085	calcium ion transmembrane transporter activity	molecular_function	0.79565	1	2	966	399	126097	Cluster-26447.44436,Cluster-26447.182885
GO:0005125	cytokine activity	molecular_function	0.79605	1	1	966	155	126097	Cluster-26447.179322
GO:0000152	nuclear ubiquitin ligase complex	cellular_component	0.79669	1	8	966	1231	126097	Cluster-26447.181675,Cluster-26447.109000,Cluster-26447.99213,Cluster-26447.24030,Cluster-26447.82623,Cluster-26447.165876,Cluster-26447.68348,Cluster-26447.114984
GO:0005680	anaphase-promoting complex	cellular_component	0.79669	1	8	966	1231	126097	Cluster-26447.82623,Cluster-26447.165876,Cluster-26447.68348,Cluster-26447.114984,Cluster-26447.181675,Cluster-26447.109000,Cluster-26447.24030,Cluster-26447.99213
GO:0031461	cullin-RING ubiquitin ligase complex	cellular_component	0.79669	1	8	966	1231	126097	Cluster-26447.109000,Cluster-26447.181675,Cluster-26447.99213,Cluster-26447.24030,Cluster-26447.165876,Cluster-26447.82623,Cluster-26447.114984,Cluster-26447.68348
GO:0001510	RNA methylation	biological_process	0.79782	1	2	966	329	126097	Cluster-26447.48330,Cluster-26447.48334
GO:0010035	response to inorganic substance	biological_process	0.79805	1	1	966	206	126097	Cluster-26447.67052
GO:0010506	regulation of autophagy	biological_process	0.80012	1	2	966	386	126097	Cluster-26447.181330,Cluster-26447.73778
GO:0006979	response to oxidative stress	biological_process	0.80013	1	3	966	626	126097	Cluster-26447.166092,Cluster-26447.142512,Cluster-26447.116962
GO:0051087	chaperone binding	molecular_function	0.80028	1	1	966	203	126097	Cluster-26447.135888
GO:0005654	nucleoplasm	cellular_component	0.8013	1	11	966	1701	126097	Cluster-26447.107986,Cluster-748.0,Cluster-26447.58799,Cluster-26447.117280,Cluster-26447.172340,Cluster-26447.135875,Cluster-26447.3666,Cluster-26447.40614,Cluster-26447.48424,Cluster-26447.107160,Cluster-26447.48425
GO:0044451	nucleoplasm part	cellular_component	0.8013	1	11	966	1701	126097	Cluster-26447.107986,Cluster-26447.172340,Cluster-26447.117280,Cluster-26447.58799,Cluster-748.0,Cluster-26447.40614,Cluster-26447.48424,Cluster-26447.3666,Cluster-26447.135875,Cluster-26447.48425,Cluster-26447.107160
GO:0016811	hydrolase activity, acting on carbon-nitrogen (but not peptide) bonds, in linear amides	molecular_function	0.80135	1	1	966	197	126097	Cluster-26447.88210
GO:0048869	cellular developmental process	biological_process	0.80145	1	7	966	1049	126097	Cluster-26447.9136,Cluster-26447.173016,Cluster-26447.135875,Cluster-26447.166543,Cluster-26447.208563,Cluster-26447.173511,Cluster-26447.216685
GO:0030133	transport vesicle	cellular_component	0.80169	1	2	966	362	126097	Cluster-26447.35196,Cluster-26447.114984
GO:0032502	developmental process	biological_process	0.80203	1	17	966	2378	126097	Cluster-26447.9136,Cluster-26447.123882,Cluster-26447.50022,Cluster-26447.75058,Cluster-26447.111493,Cluster-26447.173016,Cluster-26447.181705,Cluster-26447.216685,Cluster-26447.166543,Cluster-26447.135875,Cluster-26447.564,Cluster-27210.2,Cluster-26447.173511,Cluster-26447.159084,Cluster-26447.56531,Cluster-26447.208563,Cluster-26447.99213
GO:0016891	endoribonuclease activity, producing 5'-phosphomonoesters	molecular_function	0.8031	1	2	966	331	126097	Cluster-26447.68348,Cluster-26447.165515
GO:0003008	system process	biological_process	0.80339	1	2	966	353	126097	Cluster-26447.44385,Cluster-26447.156997
GO:0004540	ribonuclease activity	molecular_function	0.80373	1	4	966	641	126097	Cluster-26447.68348,Cluster-26447.119064,Cluster-26447.124429,Cluster-26447.165515
GO:0030258	lipid modification	biological_process	0.80387	1	1	966	190	126097	Cluster-26447.135732
GO:0008171	O-methyltransferase activity	molecular_function	0.80392	1	2	966	370	126097	Cluster-26447.71594,Cluster-26447.125593
GO:0009654	photosystem II oxygen evolving complex	cellular_component	0.8045	1	1	966	296	126097	Cluster-26447.158588
GO:0005852	eukaryotic translation initiation factor 3 complex	cellular_component	0.80509	1	1	966	179	126097	Cluster-26447.159650
GO:0051274	beta-glucan biosynthetic process	biological_process	0.80636	1	2	966	314	126097	Cluster-26447.85635,Cluster-26447.107804
GO:0051301	cell division	biological_process	0.80682	1	7	966	1070	126097	Cluster-26447.99213,Cluster-4869.0,Cluster-26447.114984,Cluster-26447.142960,Cluster-26447.73778,Cluster-26447.34800,Cluster-26447.73989
GO:0071822	protein complex subunit organization	biological_process	0.8073	1	16	966	2316	126097	Cluster-26447.109529,Cluster-26447.44224,Cluster-26447.45997,Cluster-26447.34800,Cluster-1298.0,Cluster-26447.110949,Cluster-26447.131610,Cluster-26447.185243,Cluster-26447.13697,Cluster-26447.46051,Cluster-26447.46049,Cluster-26447.179322,Cluster-26447.181330,Cluster-26447.20884,Cluster-26447.73778,Cluster-26447.93149
GO:0005543	phospholipid binding	molecular_function	0.8091	1	2	966	351	126097	Cluster-26447.69247,Cluster-26447.164716
GO:0003993	acid phosphatase activity	molecular_function	0.80935	1	1	966	183	126097	Cluster-26447.197288
GO:0019497	hexachlorocyclohexane metabolic process	biological_process	0.80935	1	1	966	183	126097	Cluster-26447.197288
GO:0004386	helicase activity	molecular_function	0.80957	1	15	966	1942	126097	Cluster-26447.37121,Cluster-2195.0,Cluster-26447.184313,Cluster-26447.120306,Cluster-26447.152201,Cluster-26447.152204,Cluster-26447.93222,Cluster-9264.0,Cluster-26447.209279,Cluster-26447.159203,Cluster-26447.205794,Cluster-26447.28276,Cluster-26447.159125,Cluster-26447.65064,Cluster-26447.58449
GO:1901135	carbohydrate derivative metabolic process	biological_process	0.80971	1	45	966	6241	126097	Cluster-26447.120543,Cluster-26447.98682,Cluster-26447.162631,Cluster-26447.10933,Cluster-26447.102199,Cluster-26447.90686,Cluster-26447.100182,Cluster-26447.115264,Cluster-26447.167496,Cluster-26447.99255,Cluster-26447.60729,Cluster-26447.75347,Cluster-26447.13906,Cluster-26447.148200,Cluster-26447.724,Cluster-26447.44436,Cluster-26447.108565,Cluster-26447.122456,Cluster-26447.1470,Cluster-26447…
GO:0009982	pseudouridine synthase activity	molecular_function	0.80985	1	1	966	222	126097	Cluster-26447.173016
GO:0000271	polysaccharide biosynthetic process	biological_process	0.80999	1	3	966	477	126097	Cluster-26447.181385,Cluster-26447.85635,Cluster-26447.107804
GO:0000922	spindle pole	cellular_component	0.8106	1	1	966	182	126097	Cluster-26447.44224
GO:0004721	phosphoprotein phosphatase activity	molecular_function	0.81072	1	2	966	348	126097	Cluster-26447.175970,Cluster-26447.164902
GO:0009967	positive regulation of signal transduction	biological_process	0.81072	1	1	966	215	126097	Cluster-26447.204930
GO:0010647	positive regulation of cell communication	biological_process	0.81072	1	1	966	215	126097	Cluster-26447.204930
GO:0023056	positive regulation of signaling	biological_process	0.81072	1	1	966	215	126097	Cluster-26447.204930
GO:0046486	glycerolipid metabolic process	biological_process	0.81086	1	10	966	1417	126097	Cluster-8641.3,Cluster-26447.86326,Cluster-26447.55740,Cluster-26447.138049,Cluster-26447.83904,Cluster-26447.13906,Cluster-26447.28828,Cluster-26447.67834,Cluster-26447.167496,Cluster-26447.99255
GO:0000151	ubiquitin ligase complex	cellular_component	0.81126	1	8	966	1248	126097	Cluster-26447.82623,Cluster-26447.165876,Cluster-26447.114984,Cluster-26447.68348,Cluster-26447.181675,Cluster-26447.109000,Cluster-26447.24030,Cluster-26447.99213
GO:0016679	oxidoreductase activity, acting on diphenols and related substances as donors	molecular_function	0.81137	1	2	966	379	126097	Cluster-26447.56410,Cluster-26447.142960
GO:0015077	monovalent inorganic cation transmembrane transporter activity	molecular_function	0.81229	1	20	966	2911	126097	Cluster-26447.163186,Cluster-26447.22371,Cluster-26447.182885,Cluster-26447.114984,Cluster-26447.207713,Cluster-26447.140126,Cluster-26447.66120,Cluster-26447.120543,Cluster-26447.158601,Cluster-26447.9447,Cluster-26447.105501,Cluster-26447.10933,Cluster-26447.10934,Cluster-26447.66043,Cluster-26447.164912,Cluster-26447.66517,Cluster-26447.37937,Cluster-26447.11686,Cluster-26447.181385,Cluster-26…
GO:0000280	nuclear division	biological_process	0.81278	1	4	966	651	126097	Cluster-26447.99213,Cluster-26447.114984,Cluster-26447.53906,Cluster-26447.34800
GO:0008677	2-dehydropantoate 2-reductase activity	molecular_function	0.81326	1	1	966	207	126097	Cluster-26447.724
GO:0010558	negative regulation of macromolecule biosynthetic process	biological_process	0.8139	1	2	966	356	126097	Cluster-26447.107804,Cluster-26447.107816
GO:0031327	negative regulation of cellular biosynthetic process	biological_process	0.8139	1	2	966	356	126097	Cluster-26447.107816,Cluster-26447.107804
GO:0051172	negative regulation of nitrogen compound metabolic process	biological_process	0.8139	1	2	966	356	126097	Cluster-26447.107816,Cluster-26447.107804
GO:2000113	negative regulation of cellular macromolecule biosynthetic process	biological_process	0.8139	1	2	966	356	126097	Cluster-26447.107804,Cluster-26447.107816
GO:0019012	virion	cellular_component	0.81419	1	24	966	3364	126097	Cluster-26447.48972,Cluster-26447.120331,Cluster-26447.130688,Cluster-26447.216428,Cluster-26447.8177,Cluster-26447.204320,Cluster-26447.184313,Cluster-26447.146217,Cluster-26447.42727,Cluster-26447.68826,Cluster-26447.173016,Cluster-26447.127700,Cluster-26447.10934,Cluster-26447.87881,Cluster-26447.157586,Cluster-26447.10933,Cluster-26447.127712,Cluster-26447.48975,Cluster-26447.82299,Cluster-26…
GO:0009127	purine nucleoside monophosphate biosynthetic process	biological_process	0.81457	1	3	966	569	126097	Cluster-26447.120543,Cluster-26447.10934,Cluster-26447.10933
GO:0009168	purine ribonucleoside monophosphate biosynthetic process	biological_process	0.81457	1	3	966	569	126097	Cluster-26447.10934,Cluster-26447.10933,Cluster-26447.120543
GO:0006566	threonine metabolic process	biological_process	0.81479	1	1	966	169	126097	Cluster-26447.185243
GO:0006779	porphyrin-containing compound biosynthetic process	biological_process	0.81515	1	2	966	387	126097	Cluster-26447.112768,Cluster-26447.83904
GO:0048513	organ development	biological_process	0.81592	1	1	966	185	126097	Cluster-26447.173511
GO:0008168	methyltransferase activity	molecular_function	0.81603	1	18	966	2577	126097	Cluster-26447.71594,Cluster-26447.100182,Cluster-26447.48334,Cluster-26447.151030,Cluster-26447.75347,Cluster-26447.97817,Cluster-26447.57410,Cluster-26447.127427,Cluster-26447.48330,Cluster-26447.113672,Cluster-26447.58690,Cluster-26447.23231,Cluster-26447.4592,Cluster-26447.107986,Cluster-26447.125593,Cluster-26447.107659,Cluster-26447.162720,Cluster-26447.91239
GO:0009161	ribonucleoside monophosphate metabolic process	biological_process	0.81672	1	16	966	2525	126097	Cluster-26447.96780,Cluster-26447.37937,Cluster-26447.108565,Cluster-26447.181385,Cluster-26447.142960,Cluster-26447.84141,Cluster-26447.204182,Cluster-26447.99074,Cluster-26447.99447,Cluster-26447.109407,Cluster-26447.75347,Cluster-26447.165528,Cluster-26447.120543,Cluster-26447.109344,Cluster-26447.10934,Cluster-26447.10933
GO:0008121	ubiquinol-cytochrome-c reductase activity	molecular_function	0.81813	1	1	966	208	126097	Cluster-26447.142960
GO:0016681	oxidoreductase activity, acting on diphenols and related substances as donors, cytochrome as acceptor	molecular_function	0.81813	1	1	966	208	126097	Cluster-26447.142960
GO:0051129	negative regulation of cellular component organization	biological_process	0.82087	1	2	966	371	126097	Cluster-26447.114984,Cluster-26447.99213
GO:0016791	phosphatase activity	molecular_function	0.82116	1	8	966	1249	126097	Cluster-26447.109407,Cluster-26447.159125,Cluster-9264.0,Cluster-26447.120306,Cluster-26447.175970,Cluster-26447.164902,Cluster-26447.197288,Cluster-26447.109344
GO:0005975	carbohydrate metabolic process	biological_process	0.82129	1	45	966	6249	126097	Cluster-26447.63019,Cluster-26447.107535,Cluster-26447.109344,Cluster-26447.121272,Cluster-26447.109407,Cluster-26447.135625,Cluster-26447.107804,Cluster-26447.153858,Cluster-26447.125593,Cluster-26447.211581,Cluster-26447.186119,Cluster-26447.26075,Cluster-26447.109452,Cluster-26447.107986,Cluster-26447.42104,Cluster-26447.135627,Cluster-26447.53906,Cluster-26447.35100,Cluster-26447.90686,Cluste…
GO:0000041	transition metal ion transport	biological_process	0.82232	1	4	966	677	126097	Cluster-26447.2402,Cluster-26447.125377,Cluster-26447.48334,Cluster-26447.48330
GO:0051273	beta-glucan metabolic process	biological_process	0.82297	1	2	966	328	126097	Cluster-26447.107804,Cluster-26447.85635
GO:0006096	glycolytic process	biological_process	0.82306	1	3	966	640	126097	Cluster-26447.109407,Cluster-26447.108565,Cluster-26447.109344
GO:0006757	ATP generation from ADP	biological_process	0.82306	1	3	966	640	126097	Cluster-26447.108565,Cluster-26447.109344,Cluster-26447.109407
GO:0009135	purine nucleoside diphosphate metabolic process	biological_process	0.82306	1	3	966	640	126097	Cluster-26447.109407,Cluster-26447.108565,Cluster-26447.109344
GO:0009179	purine ribonucleoside diphosphate metabolic process	biological_process	0.82306	1	3	966	640	126097	Cluster-26447.108565,Cluster-26447.109344,Cluster-26447.109407
GO:0009185	ribonucleoside diphosphate metabolic process	biological_process	0.82306	1	3	966	640	126097	Cluster-26447.109407,Cluster-26447.108565,Cluster-26447.109344
GO:0046031	ADP metabolic process	biological_process	0.82306	1	3	966	640	126097	Cluster-26447.109407,Cluster-26447.109344,Cluster-26447.108565
GO:0009163	nucleoside biosynthetic process	biological_process	0.8233	1	4	966	747	126097	Cluster-26447.120543,Cluster-26447.10933,Cluster-26447.118735,Cluster-26447.10934
GO:0042455	ribonucleoside biosynthetic process	biological_process	0.8233	1	4	966	747	126097	Cluster-26447.118735,Cluster-26447.10934,Cluster-26447.10933,Cluster-26447.120543
GO:0005839	proteasome core complex	cellular_component	0.82397	1	1	966	261	126097	Cluster-26447.70052
GO:0051537	2 iron, 2 sulfur cluster binding	molecular_function	0.82501	1	2	966	373	126097	Cluster-26447.6629,Cluster-26447.205596
GO:0006402	mRNA catabolic process	biological_process	0.82505	1	1	966	191	126097	Cluster-26447.26693
GO:1902600	hydrogen ion transmembrane transport	biological_process	0.82513	1	6	966	974	126097	Cluster-26447.10934,Cluster-26447.10933,Cluster-26447.114984,Cluster-26447.77712,Cluster-26447.163186,Cluster-26447.120543
GO:0006289	nucleotide-excision repair	biological_process	0.82553	1	1	966	206	126097	Cluster-26447.28276
GO:0009082	branched-chain amino acid biosynthetic process	biological_process	0.8265	1	1	966	186	126097	Cluster-26447.207435
GO:0031023	microtubule organizing center organization	biological_process	0.82674	1	1	966	190	126097	Cluster-26447.45997
GO:0008173	RNA methyltransferase activity	molecular_function	0.82712	1	3	966	499	126097	Cluster-26447.57410,Cluster-26447.125593,Cluster-26447.75347
GO:0009252	peptidoglycan biosynthetic process	biological_process	0.82721	1	1	966	210	126097	Cluster-26447.115264
GO:0044445	cytosolic part	cellular_component	0.82777	1	2	966	412	126097	Cluster-26447.114984,Cluster-26447.108565
GO:0016054	organic acid catabolic process	biological_process	0.82823	1	5	966	817	126097	Cluster-26447.112768,Cluster-26447.98682,Cluster-26447.135732,Cluster-26447.9847,Cluster-26447.724
GO:0046395	carboxylic acid catabolic process	biological_process	0.82823	1	5	966	817	126097	Cluster-26447.112768,Cluster-26447.98682,Cluster-26447.135732,Cluster-26447.9847,Cluster-26447.724
GO:0003909	DNA ligase activity	molecular_function	0.82903	1	1	966	170	126097	Cluster-26447.105
GO:0006401	RNA catabolic process	biological_process	0.82953	1	1	966	194	126097	Cluster-26447.26693
GO:0072686	mitotic spindle	cellular_component	0.83118	1	1	966	208	126097	Cluster-26447.135888
GO:0046907	intracellular transport	biological_process	0.8312	1	36	966	4725	126097	Cluster-26447.107535,Cluster-26447.121926,Cluster-26447.184313,Cluster-26447.125274,Cluster-26447.205786,Cluster-26447.33592,Cluster-26447.36136,Cluster-26447.12529,Cluster-26447.147428,Cluster-26447.89265,Cluster-26447.166222,Cluster-26447.48978,Cluster-26447.48974,Cluster-26447.73778,Cluster-26447.121410,Cluster-26447.96780,Cluster-26447.159084,Cluster-26447.9095,Cluster-26447.120306,Cluster-26…
GO:0005829	cytosol	cellular_component	0.83142	1	2	966	416	126097	Cluster-26447.108565,Cluster-26447.114984
GO:0031334	positive regulation of protein complex assembly	biological_process	0.83229	1	1	966	212	126097	Cluster-26447.44224
GO:0032273	positive regulation of protein polymerization	biological_process	0.83229	1	1	966	212	126097	Cluster-26447.44224
GO:0044089	positive regulation of cellular component biogenesis	biological_process	0.83229	1	1	966	212	126097	Cluster-26447.44224
GO:0051495	positive regulation of cytoskeleton organization	biological_process	0.83229	1	1	966	212	126097	Cluster-26447.44224
GO:0009966	regulation of signal transduction	biological_process	0.83284	1	3	966	554	126097	Cluster-26447.211242,Cluster-26447.204930,Cluster-27210.2
GO:0098798	mitochondrial protein complex	cellular_component	0.83296	1	4	966	727	126097	Cluster-26447.84696,Cluster-26447.107535,Cluster-20433.0,Cluster-26447.43983
GO:0071702	organic substance transport	biological_process	0.83311	1	53	966	6846	126097	Cluster-26447.135888,Cluster-26447.17376,Cluster-26447.63613,Cluster-26447.119868,Cluster-20433.0,Cluster-26447.55764,Cluster-26447.58259,Cluster-26447.152478,Cluster-26447.74407,Cluster-26447.158690,Cluster-26447.85635,Cluster-26447.167496,Cluster-26447.182885,Cluster-26447.137866,Cluster-26447.26715,Cluster-26447.13906,Cluster-26447.65687,Cluster-26447.26018,Cluster-26447.120306,Cluster-26447.9…
GO:0042393	histone binding	molecular_function	0.83412	1	1	966	222	126097	Cluster-26447.99827
GO:0019087	transformation of host cell by virus	biological_process	0.83418	1	1	966	202	126097	Cluster-26447.82299
GO:0009890	negative regulation of biosynthetic process	biological_process	0.83477	1	2	966	377	126097	Cluster-26447.107804,Cluster-26447.107816
GO:0009273	peptidoglycan-based cell wall biogenesis	biological_process	0.835	1	1	966	216	126097	Cluster-26447.115264
GO:0016879	ligase activity, forming carbon-nitrogen bonds	molecular_function	0.83558	1	3	966	574	126097	Cluster-26447.115264,Cluster-26447.200422,Cluster-26447.200419
GO:0051338	regulation of transferase activity	biological_process	0.83761	1	2	966	404	126097	Cluster-26447.99213,Cluster-26447.114984
GO:0044724	single-organism carbohydrate catabolic process	biological_process	0.83779	1	3	966	664	126097	Cluster-26447.109407,Cluster-26447.108565,Cluster-26447.109344
GO:0009521	photosystem	cellular_component	0.83899	1	5	966	1037	126097	Cluster-26447.120346,Cluster-26447.106016,Cluster-26447.158588,Cluster-26447.123882,Cluster-26447.143611
GO:0009378	four-way junction helicase activity	molecular_function	0.83972	1	5	966	802	126097	Cluster-26447.205794,Cluster-26447.65064,Cluster-26447.120306,Cluster-2195.0,Cluster-26447.58449
GO:0009379	Holliday junction helicase complex	cellular_component	0.83972	1	5	966	802	126097	Cluster-26447.58449,Cluster-26447.205794,Cluster-26447.120306,Cluster-26447.65064,Cluster-2195.0
GO:0048476	Holliday junction resolvase complex	cellular_component	0.83972	1	5	966	802	126097	Cluster-26447.58449,Cluster-26447.65064,Cluster-26447.205794,Cluster-26447.120306,Cluster-2195.0
GO:0016108	tetraterpenoid metabolic process	biological_process	0.84023	1	1	966	223	126097	Cluster-26447.123064
GO:0016109	tetraterpenoid biosynthetic process	biological_process	0.84023	1	1	966	223	126097	Cluster-26447.123064
GO:0016116	carotenoid metabolic process	biological_process	0.84023	1	1	966	223	126097	Cluster-26447.123064
GO:0016117	carotenoid biosynthetic process	biological_process	0.84023	1	1	966	223	126097	Cluster-26447.123064
GO:0019013	viral nucleocapsid	cellular_component	0.84035	1	2	966	397	126097	Cluster-26447.127700,Cluster-26447.127712
GO:0005882	intermediate filament	cellular_component	0.84221	1	2	966	380	126097	Cluster-26447.30797,Cluster-26447.181330
GO:0045111	intermediate filament cytoskeleton	cellular_component	0.84221	1	2	966	380	126097	Cluster-26447.181330,Cluster-26447.30797
GO:0044038	cell wall macromolecule biosynthetic process	biological_process	0.84314	1	1	966	224	126097	Cluster-26447.115264
GO:0070589	cellular component macromolecule biosynthetic process	biological_process	0.84314	1	1	966	224	126097	Cluster-26447.115264
GO:0098542	defense response to other organism	biological_process	0.84329	1	4	966	719	126097	Cluster-26447.167327,Cluster-26447.120331,Cluster-26447.109788,Cluster-26447.212720
GO:0005992	trehalose biosynthetic process	biological_process	0.84355	1	1	966	210	126097	Cluster-26447.35100
GO:0019080	viral gene expression	biological_process	0.84366	1	1	966	211	126097	Cluster-26447.187623
GO:0005057	receptor signaling protein activity	molecular_function	0.84379	1	2	966	369	126097	Cluster-26447.79310,Cluster-26447.137118
GO:1901565	organonitrogen compound catabolic process	biological_process	0.84424	1	8	966	1264	126097	Cluster-26447.91564,Cluster-26447.724,Cluster-26447.162631,Cluster-26447.91562,Cluster-26447.98682,Cluster-26447.9847,Cluster-26447.160578,Cluster-26447.112768
GO:0044815	DNA packaging complex	cellular_component	0.84487	1	1	966	275	126097	Cluster-26447.53906
GO:0022836	gated channel activity	molecular_function	0.84489	1	7	966	1185	126097	Cluster-26447.102118,Cluster-26447.200669,Cluster-26447.44436,Cluster-26447.66120,Cluster-26447.56531,Cluster-30803.0,Cluster-26447.182885
GO:0051181	cofactor transport	biological_process	0.84636	1	1	966	200	126097	Cluster-1298.0
GO:0006952	defense response	biological_process	0.84771	1	10	966	1577	126097	Cluster-26447.109788,Cluster-26447.212720,Cluster-26447.69821,Cluster-26447.120331,Cluster-26447.167327,Cluster-26447.191579,Cluster-26447.212926,Cluster-26447.125377,Cluster-26447.133527,Cluster-26447.107555
GO:0006165	nucleoside diphosphate phosphorylation	biological_process	0.84827	1	3	966	683	126097	Cluster-26447.108565,Cluster-26447.109344,Cluster-26447.109407
GO:0046939	nucleotide phosphorylation	biological_process	0.84827	1	3	966	683	126097	Cluster-26447.109407,Cluster-26447.109344,Cluster-26447.108565
GO:0010646	regulation of cell communication	biological_process	0.84848	1	3	966	574	126097	Cluster-26447.211242,Cluster-26447.204930,Cluster-27210.2
GO:0004129	cytochrome-c oxidase activity	molecular_function	0.84854	1	2	966	392	126097	Cluster-26447.181385,Cluster-26447.37937
GO:0006123	mitochondrial electron transport, cytochrome c to oxygen	biological_process	0.84854	1	2	966	392	126097	Cluster-26447.181385,Cluster-26447.37937
GO:0016675	oxidoreductase activity, acting on a heme group of donors	molecular_function	0.84854	1	2	966	392	126097	Cluster-26447.37937,Cluster-26447.181385
GO:0016676	oxidoreductase activity, acting on a heme group of donors, oxygen as acceptor	molecular_function	0.84854	1	2	966	392	126097	Cluster-26447.37937,Cluster-26447.181385
GO:0045277	respiratory chain complex IV	cellular_component	0.84854	1	2	966	392	126097	Cluster-26447.181385,Cluster-26447.37937
GO:0048285	organelle fission	biological_process	0.84857	1	4	966	709	126097	Cluster-26447.114984,Cluster-26447.99213,Cluster-26447.53906,Cluster-26447.34800
GO:0007049	cell cycle	biological_process	0.84862	1	17	966	2544	126097	Cluster-26447.73989,Cluster-26447.184774,Cluster-26447.57455,Cluster-26447.99213,Cluster-4869.0,Cluster-26447.73778,Cluster-26447.135888,Cluster-26447.142960,Cluster-26447.53906,Cluster-26447.181330,Cluster-26447.34800,Cluster-4675.0,Cluster-26447.122732,Cluster-26447.45997,Cluster-26447.84191,Cluster-26447.184773,Cluster-26447.114984
GO:0002376	immune system process	biological_process	0.84898	1	7	966	1074	126097	Cluster-26447.212720,Cluster-26447.79081,Cluster-26447.204930,Cluster-26447.114501,Cluster-31356.0,Cluster-26447.191579,Cluster-26447.164902
GO:0044242	cellular lipid catabolic process	biological_process	0.84955	1	1	966	200	126097	Cluster-26447.135732
GO:0006470	protein dephosphorylation	biological_process	0.84965	1	2	966	380	126097	Cluster-26447.164902,Cluster-26447.175970
GO:0048609	multicellular organismal reproductive process	biological_process	0.85	1	3	966	623	126097	Cluster-26447.46051,Cluster-26447.46049,Cluster-26447.190892
GO:0071944	cell periphery	cellular_component	0.85052	1	28	966	4072	126097	Cluster-26447.65167,Cluster-26447.40614,Cluster-26447.66517,Cluster-26447.107160,Cluster-26447.175250,Cluster-26447.56531,Cluster-26447.117301,Cluster-26447.77681,Cluster-26447.195148,Cluster-31356.0,Cluster-26447.84540,Cluster-26447.9136,Cluster-26447.85635,Cluster-26447.22371,Cluster-26447.107804,Cluster-26447.173733,Cluster-26447.94903,Cluster-26447.114501,Cluster-26447.79081,Cluster-26447.205…
GO:0030414	peptidase inhibitor activity	molecular_function	0.85102	1	2	966	390	126097	Cluster-26447.75058,Cluster-26447.122456
GO:0061134	peptidase regulator activity	molecular_function	0.85102	1	2	966	390	126097	Cluster-26447.122456,Cluster-26447.75058
GO:0009250	glucan biosynthetic process	biological_process	0.85136	1	2	966	356	126097	Cluster-26447.107804,Cluster-26447.85635
GO:0019829	cation-transporting ATPase activity	molecular_function	0.85183	1	1	966	239	126097	Cluster-26447.120543
[truncated: 395 more rows]

## Sheet: T300vsT0_down_GOEnrichment
Dataset S3. The down-regulated GO enrichment of T300 vs T0. GO_accession is the ID of GO accession. Description means the description of Term_type. Over_represented pValue is the Pvalue of GO enrichment analysis. Corrected_pValue means the corrected Pvalue. DEG_item is the number of DEGs related to the GO term. DEG_list is the number of DEGs in the GO annotations. Bg_item is the number of backgro…
GO_accession	Description	Term_type	Over_represented_pValue	Corrected_pValue	DEG_item	DEG_list	Bg_item	Bg_list	Gene_names
GO:0030193	regulation of blood coagulation	biological_process	0.00043387	0.43951	2	205	20	126097	Cluster-26447.147487,Cluster-26447.147490
GO:0050818	regulation of coagulation	biological_process	0.00043387	0.43951	2	205	20	126097	Cluster-26447.147490,Cluster-26447.147487
GO:0061041	regulation of wound healing	biological_process	0.00043387	0.43951	2	205	20	126097	Cluster-26447.147490,Cluster-26447.147487
GO:1900046	regulation of hemostasis	biological_process	0.00043387	0.43951	2	205	20	126097	Cluster-26447.147487,Cluster-26447.147490
GO:1903034	regulation of response to wounding	biological_process	0.00043387	0.43951	2	205	20	126097	Cluster-26447.147487,Cluster-26447.147490
GO:0007155	cell adhesion	biological_process	0.00097411	0.82231	6	205	626	126097	Cluster-26447.147487,Cluster-26447.215641,Cluster-26447.147490,Cluster-26447.132140,Cluster-26447.122201,Cluster-26447.212739
GO:0022610	biological adhesion	biological_process	0.0013409	0.9702	6	205	664	126097	Cluster-26447.122201,Cluster-26447.212739,Cluster-26447.147487,Cluster-26447.215641,Cluster-26447.147490,Cluster-26447.132140
GO:0032465	regulation of cytokinesis	biological_process	0.0053698	1	2	205	55	126097	Cluster-26447.4706,Cluster-26447.211762
GO:0004356	glutamate-ammonia ligase activity	molecular_function	0.0064994	1	2	205	84	126097	Cluster-26447.112441,Cluster-26447.130862
GO:0016211	ammonia ligase activity	molecular_function	0.0064994	1	2	205	84	126097	Cluster-26447.112441,Cluster-26447.130862
GO:0016880	acid-ammonia (or amide) ligase activity	molecular_function	0.0064994	1	2	205	84	126097	Cluster-26447.130862,Cluster-26447.112441
GO:0006807	nitrogen compound metabolic process	biological_process	0.0068667	1	82	205	37966	126097	Cluster-26447.145517,Cluster-26447.83871,Cluster-26447.89895,Cluster-26447.35739,Cluster-26447.108086,Cluster-26447.41610,Cluster-26447.184057,Cluster-26447.16301,Cluster-26447.167047,Cluster-26447.95667,Cluster-26447.10417,Cluster-26447.147487,Cluster-26447.110976,Cluster-26447.65165,Cluster-26447.130605,Cluster-26447.13966,Cluster-26447.93812,Cluster-26447.142868,Cluster-26447.29214,Cluster-264…
GO:0006370	7-methylguanosine mRNA capping	biological_process	0.0071409	1	2	205	73	126097	Cluster-26447.127461,Cluster-26447.92402
GO:0015074	DNA integration	biological_process	0.0091673	1	6	205	918	126097	Cluster-26447.144176,Cluster-26447.131163,Cluster-26447.16996,Cluster-26447.142868,Cluster-26447.16999,Cluster-5802.1
GO:0044283	small molecule biosynthetic process	biological_process	0.010141	1	13	205	3733	126097	Cluster-26447.177601,Cluster-26447.99121,Cluster-26447.153852,Cluster-26447.103203,Cluster-26447.111873,Cluster-26447.16301,Cluster-26447.130862,Cluster-26447.83871,Cluster-26447.130605,Cluster-26447.144176,Cluster-26447.19285,Cluster-26447.85629,Cluster-26447.47220
GO:0009108	coenzyme biosynthetic process	biological_process	0.016536	1	7	205	1531	126097	Cluster-26447.130605,Cluster-26447.83871,Cluster-26447.177601,Cluster-26447.47220,Cluster-26447.16301,Cluster-26447.144176,Cluster-26447.19285
GO:0009396	folic acid-containing compound biosynthetic process	biological_process	0.017621	1	3	205	316	126097	Cluster-26447.83871,Cluster-26447.19285,Cluster-26447.47220
GO:0016053	organic acid biosynthetic process	biological_process	0.019	1	10	205	2766	126097	Cluster-26447.19285,Cluster-26447.85629,Cluster-26447.47220,Cluster-26447.130862,Cluster-26447.83871,Cluster-26447.130605,Cluster-26447.111873,Cluster-26447.16301,Cluster-26447.99121,Cluster-26447.153852
GO:0046394	carboxylic acid biosynthetic process	biological_process	0.019	1	10	205	2766	126097	Cluster-26447.16301,Cluster-26447.111873,Cluster-26447.153852,Cluster-26447.99121,Cluster-26447.47220,Cluster-26447.19285,Cluster-26447.85629,Cluster-26447.83871,Cluster-26447.130605,Cluster-26447.130862
GO:0042398	cellular modified amino acid biosynthetic process	biological_process	0.019571	1	5	205	887	126097	Cluster-26447.16301,Cluster-26447.47220,Cluster-26447.19285,Cluster-26447.83871,Cluster-26447.130605
GO:0015889	cobalamin transport	biological_process	0.019586	1	1	205	13	126097	Cluster-26447.142869
GO:0042559	pteridine-containing compound biosynthetic process	biological_process	0.020325	1	3	205	333	126097	Cluster-26447.47220,Cluster-26447.19285,Cluster-26447.83871
GO:0030904	retromer complex	cellular_component	0.021508	1	1	205	11	126097	Cluster-26447.101104
GO:0044036	cell wall macromolecule metabolic process	biological_process	0.021562	1	3	205	334	126097	Cluster-26447.112441,Cluster-26447.155211,Cluster-26447.130862
GO:0009110	vitamin biosynthetic process	biological_process	0.021848	1	6	205	1242	126097	Cluster-26447.47220,Cluster-26447.16301,Cluster-26447.19285,Cluster-26447.103203,Cluster-26447.130605,Cluster-26447.177601
GO:0042364	water-soluble vitamin biosynthetic process	biological_process	0.021848	1	6	205	1242	126097	Cluster-26447.19285,Cluster-26447.16301,Cluster-26447.47220,Cluster-26447.177601,Cluster-26447.103203,Cluster-26447.130605
GO:0005351	sugar:proton symporter activity	molecular_function	0.021852	1	2	205	128	126097	Cluster-22740.0,Cluster-26447.152477
GO:0015295	solute:proton symporter activity	molecular_function	0.021852	1	2	205	128	126097	Cluster-26447.152477,Cluster-22740.0
GO:0004483	mRNA (nucleoside-2'-O-)-methyltransferase activity	molecular_function	0.022438	1	1	205	13	126097	Cluster-26447.127461
GO:0006760	folic acid-containing compound metabolic process	biological_process	0.022575	1	3	205	342	126097	Cluster-26447.83871,Cluster-26447.47220,Cluster-26447.19285
GO:0006766	vitamin metabolic process	biological_process	0.022658	1	7	205	1585	126097	Cluster-26447.19285,Cluster-26447.69633,Cluster-26447.47220,Cluster-26447.16301,Cluster-26447.177601,Cluster-26447.130605,Cluster-26447.103203
GO:0006767	water-soluble vitamin metabolic process	biological_process	0.022658	1	7	205	1585	126097	Cluster-26447.103203,Cluster-26447.130605,Cluster-26447.177601,Cluster-26447.16301,Cluster-26447.47220,Cluster-26447.69633,Cluster-26447.19285
GO:0009069	serine family amino acid metabolic process	biological_process	0.024095	1	6	205	1141	126097	Cluster-26447.147487,Cluster-26447.162992,Cluster-26447.147490,Cluster-26447.47220,Cluster-26447.198297,Cluster-26447.189426
GO:0043648	dicarboxylic acid metabolic process	biological_process	0.024535	1	5	205	896	126097	Cluster-26447.47220,Cluster-26447.111873,Cluster-26447.19285,Cluster-26447.73076,Cluster-26447.130605
GO:0004803	transposase activity	molecular_function	0.02603	1	3	205	303	126097	Cluster-26447.10070,Cluster-26447.35739,Cluster-26447.145517
[truncated: 1,177 more rows]
