# Supplementary material for: Differentially expressed genes related to oxidoreductase activity and glutathione metabolism underlying the adaptation of Phragmites australis from the salt marsh in the Yellow River Delta, China
Source: PeerJ. 2020 Oct 2;8:e10024. doi: 10.7717/peerj.10024 (PMC7537617; doi:10.7717/peerj.10024)
Supplement: Dataset S4 — Term: The name of the enriched KEGG pathway. ID: the ID of KEGG pathway. Input number is the number of DEGs related to this KEGG pathway. Background number means the number of all the genes related to this KEGG pathway. KO, the corresponding KO number of the DEGs enriched in this pathway. Entrez_ID, the Entrez number of DEGs enriched in the pathway. Ensembl_ID, the corresponding Ensembl number of the DES enriched in this pathway. Hyperlink means the link of enriched KEGG payhway on KEGG official website. Statistical test method: hypergeometric test/Fisher’s exact test; FDR correction method: Benjamini and Hochberg. [file peerj-08-10024-s014.xlsx]

## Sheet: T300vsT0_up_KEGGenrich
Dataset S4.T300 vs T0 up-regluated KEGG enrichment. Term: The name of the enriched KEGG pathway. ID: the ID of KEGG pathway. Input number is the number of DEGs related to this KEGG pathway. Background number means the number of all the genes related to this KEGG pathway. KO: the corresponding KO number of the DEGs enriched in this pathway.Entrez_ID: the Entrez number of DEGs enriched in the pathw…
Term	Database	ID	Input number	Background number	P-Value	Corrected P-Value	Input	KO	Entrez_ID	Ensembl_ID	KO_name	Hyperlink
Glutathione metabolism	KEGG PATHWAY	ko00480	13	642	0.000427712	0.0224099	Cluster-26447.125406|Cluster-26447.109452|Cluster-26447.33049|Cluster-26447.160591|Cluster-26447.177110|Cluster-26447.206365|Cluster-26447.141508|Cluster-26447.177111|Cluster-26447.153858|Cluster-26447.116962|Cluster-26447.95407|Cluster-26447.95406|Cluster-26447.60729	K00799|K00036|K00383|K00799|K00799|K00799|K00799|K00799|K00033|K00434|K00383|K00383|K00036|	| | | | | | | | | | | | |	|||||||||||||	GST, gst|G6PD, zwf|GSR, gor|GST, gst|GST, gst|GST, gst|GST, gst|GST, gst|PGD, gnd, gntZ|E1.11.1.11|GSR, gor|GSR, gor|G6PD, zwf|	http://www.genome.jp/kegg-bin/show_pathway?ko00480/K00036%09red/K00033%09red/K00434%09red/K00799%09red/K00383%09red
Cutin, suberine and wax biosynthesis	KEGG PATHWAY	ko00073	6	144	0.000476807	0.0224099	Cluster-26447.198821|Cluster-26447.61261|Cluster-26447.204994|Cluster-8641.2|Cluster-8641.3|Cluster-26447.33566	K13356|K13356|K13356|K15400|K15400|K13356|	| | | | | |	||||||	FAR|FAR|FAR|HHT1|HHT1|FAR|	http://www.genome.jp/kegg-bin/show_pathway?ko00073/K13356%09red/K15400%09red
Cyanoamino acid metabolism	KEGG PATHWAY	ko00460	9	428	0.00248704	0.0779273	Cluster-26447.84808|Cluster-26447.86003|Cluster-26447.107398|Cluster-26447.113691|Cluster-27210.2|Cluster-26447.115151|Cluster-26447.203494|Cluster-26447.26073|Cluster-26447.26075	K00600|K01501|K00600|K01188|K13029|K01188|K13029|K05349|K05349|	| | | | | | | | |	|||||||||	glyA, SHMT|E3.5.5.1|glyA, SHMT|E3.2.1.21|CYP71E1|E3.2.1.21|CYP71E1|bglX|bglX|	http://www.genome.jp/kegg-bin/show_pathway?ko00460/K01188%09red/K05349%09red/K13029%09red/K01501%09red/K00600%09red
Plant hormone signal transduction	KEGG PATHWAY	ko04075	20	1567	0.00421679	0.0990945	Cluster-26447.109208|Cluster-26447.97308|Cluster-26447.127679|Cluster-26447.211131|Cluster-26447.147946|Cluster-26447.36306|Cluster-26447.133826|Cluster-26447.106850|Cluster-26447.133824|Cluster-26447.23303|Cluster-26447.123263|Cluster-26447.160578|Cluster-26447.205876|Cluster-26447.9960|Cluster-26447.137118|Cluster-26447.129960|Cluster-26447.79310|Cluster-26447.117379|Cluster-26447.111541|Cluste…	K13449|K14508|K14509|K14488|K13422|K14497|K14498|K14508|K14498|K13449|K14497|K14432|K14431|K14484|K14509|K14498|K14509|K13449|K13449|K14508|	| | | | | | | | | | | | | | | | | | | |	||||||||||||||||||||	PR1|NPR1|ETR, ERS|SAUR|MYC2|PP2C|SNRK2|NPR1|SNRK2|PR1|PP2C|ABF|TGA|IAA|ETR, ERS|SNRK2|ETR, ERS|PR1|PR1|NPR1|	http://www.genome.jp/kegg-bin/show_pathway?ko04075/K14484%09red/K14432%09red/K14431%09red/K14498%09red/K14509%09red/K14508%09red/K14497%09red/K14488%09red/K13449%09red/K13422%09red
Stilbenoid, diarylheptanoid and gingerol biosynthesis	KEGG PATHWAY	ko00945	4	126	0.010569	0.198697	Cluster-26447.173447|Cluster-26447.146841|Cluster-26447.933|Cluster-26447.134519	K00517|K09754|K13065|K00517|	| | | |	||||	E1.14.-.-|CYP98A3, C3'H|E2.3.1.133, HCT|E1.14.-.-|	http://www.genome.jp/kegg-bin/show_pathway?ko00945/K09754%09red/K13065%09red/K00517%09red
Glycine, serine and threonine metabolism	KEGG PATHWAY	ko00260	11	800	0.0184215	0.288603	Cluster-26447.1470|Cluster-26447.84808|Cluster-26447.113958|Cluster-26447.107398|Cluster-26447.8416|Cluster-26447.9847|Cluster-26447.110207|Cluster-26447.125274|Cluster-26447.155076|Cluster-26447.100703|Cluster-26447.56669	K01695|K00600|K15919|K00600|K01695|K00306|K15919|K15918|K15919|K00276|K00058|	| | | | | | | | | | |	|||||||||||	trpA|glyA, SHMT|HPR2|glyA, SHMT|trpA|PIPOX|HPR2|GLYK|HPR2|AOC3, AOC2, tynA|serA, PHGDH|	http://www.genome.jp/kegg-bin/show_pathway?ko00260/K00276%09red/K00058%09red/K15919%09red/K15918%09red/K01695%09red/K00306%09red/K00600%09red
Peroxisome	KEGG PATHWAY	ko04146	14	1229	0.0349244	0.468985	Cluster-26447.109484|Cluster-26447.110198|Cluster-26447.81411|Cluster-26447.198821|Cluster-26447.61261|Cluster-26447.204994|Cluster-26447.155054|Cluster-26447.9847|Cluster-26447.155056|Cluster-26447.155043|Cluster-26447.155053|Cluster-26447.135732|Cluster-26447.33566|Cluster-26447.64869	K11517|K11517|K13346|K13356|K13356|K13356|K12261|K00306|K12261|K12261|K12261|K00232|K13356|K00232|	| | | | | | | | | | | | | |	||||||||||||||	HAO|HAO|PEX10|FAR|FAR|FAR|HACL1|PIPOX|HACL1|HACL1|HACL1|E1.3.3.6, ACOX1, ACOX3|FAR|E1.3.3.6, ACOX1, ACOX3|	http://www.genome.jp/kegg-bin/show_pathway?ko04146/K13356%09red/K11517%09red/K12261%09red/K00306%09red/K00232%09red/K13346%09red
Lysine degradation	KEGG PATHWAY	ko00310	5	310	0.056258	0.52243	Cluster-26447.44385|Cluster-26447.28590|Cluster-26447.30715|Cluster-26447.9847|Cluster-26447.179927	K14157|K14157|K14157|K00306|K14157|	| | | | |	|||||	AASS|AASS|AASS|PIPOX|AASS|	http://www.genome.jp/kegg-bin/show_pathway?ko00310/K00306%09red/K14157%09red
Monoterpenoid biosynthesis	KEGG PATHWAY	ko00902	2	57	0.0567299	0.52243	Cluster-26447.205592|Cluster-26447.84850	K15095|K15095|	| |	||	E1.1.1.208|E1.1.1.208|	http://www.genome.jp/kegg-bin/show_pathway?ko00902/K15095%09red
Sesquiterpenoid and triterpenoid biosynthesis	KEGG PATHWAY	ko00909	2	61	0.0636775	0.52243	Cluster-26447.206703|Cluster-26447.206705	K15803|K15803|	| |	||	GERD|GERD|	http://www.genome.jp/kegg-bin/show_pathway?ko00909/K15803%09red
Phenylpropanoid biosynthesis	KEGG PATHWAY	ko00940	10	868	0.0637131	0.52243	Cluster-26447.165876|Cluster-26447.3892|Cluster-26447.146841|Cluster-26447.933|Cluster-26447.113691|Cluster-26447.65262|Cluster-26447.148200|Cluster-26447.115151|Cluster-26447.26073|Cluster-26447.26075	K09753|K12355|K09754|K13065|K01188|K09755|K00083|K01188|K05349|K05349|	| | | | | | | | | |	||||||||||	CCR|REF1|CYP98A3, C3'H|E2.3.1.133, HCT|E3.2.1.21|CYP84A, F5H|E1.1.1.195|E3.2.1.21|bglX|bglX|	http://www.genome.jp/kegg-bin/show_pathway?ko00940/K13065%09red/K01188%09red/K00083%09red/K12355%09red/K09754%09red/K09755%09red/K05349%09red/K09753%09red
Arginine biosynthesis	KEGG PATHWAY	ko00220	5	334	0.0720629	0.52243	Cluster-26447.166722|Cluster-26447.140493|Cluster-26447.145625|Cluster-26447.125048|Cluster-26447.128951	K00262|K14682|K00818|K00818|K00818|	| | | | |	|||||	E1.4.1.4, gdhA|argAB|E2.6.1.11, argD|E2.6.1.11, argD|E2.6.1.11, argD|	http://www.genome.jp/kegg-bin/show_pathway?ko00220/K00818%09red/K00262%09red/K14682%09red
alpha-Linolenic acid metabolism	KEGG PATHWAY	ko00592	5	349	0.0830526	0.52243	Cluster-26447.135732|Cluster-26447.86326|Cluster-26447.83904|Cluster-26447.28719|Cluster-26447.64869	K00232|K14674|K14674|K05894|K00232|	| | | | |	|||||	E1.3.3.6, ACOX1, ACOX3|TGL4|TGL4|OPR|E1.3.3.6, ACOX1, ACOX3|	http://www.genome.jp/kegg-bin/show_pathway?ko00592/K14674%09red/K00232%09red/K05894%09red
Phenylalanine, tyrosine and tryptophan biosynthesis	KEGG PATHWAY	ko00400	6	459	0.0852428	0.52243	Cluster-26447.1470|Cluster-26447.59916|Cluster-26447.63369|Cluster-26447.106013|Cluster-26447.59922|Cluster-26447.8416	K01695|K01850|K00817|K00891|K01850|K01695|	| | | | | |	||||||	trpA|E5.4.99.5|hisC|E2.7.1.71, aroK, aroL|E5.4.99.5|trpA|	http://www.genome.jp/kegg-bin/show_pathway?ko00400/K01695%09red/K00891%09red/K01850%09red/K00817%09red
Ribosome	KEGG PATHWAY	ko03010	20	2199	0.091484	0.52243	Cluster-26447.46116|Cluster-26447.82999|Cluster-26447.83005|Cluster-26447.113672|Cluster-26447.107355|Cluster-26447.127219|Cluster-26447.122861|Cluster-26447.91082|Cluster-26447.129937|Cluster-26447.93826|Cluster-26447.117627|Cluster-26447.94456|Cluster-26447.113331|Cluster-26447.92046|Cluster-26447.124497|Cluster-26447.62499|Cluster-26447.105731|Cluster-26447.127256|Cluster-26447.103121|Cluster-…	K02894|K02921|K02921|K02947|K02873|K02957|K02957|K02997|K02905|K02937|K02902|K02969|K02902|K02932|K02893|K02921|K02957|K02942|K02987|K02894|	| | | | | | | | | | | | | | | | | | | |	||||||||||||||||||||	RP-L23e, RPL23|RP-L37Ae, RPL37A|RP-L37Ae, RPL37A|RP-S10e, RPS10|RP-L13e, RPL13|RP-S15Ae, RPS15A|RP-S15Ae, RPS15A|RP-S9e, RPS9|RP-L29e, RPL29|RP-L7e, RPL7|RP-L28, MRPL28, rpmB|RP-S20e, RPS20|RP-L28, MRPL28, rpmB|RP-L5e, RPL5|RP-L23Ae, RPL23A|RP-L37Ae, RPL37A|RP-S15Ae, RPS15A|RP-LP1, RPLP1|RP-S4e, RPS4|RP-L23e, RPL23|	http://www.genome.jp/kegg-bin/show_pathway?ko03010/K02957%09red/K02921%09red/K02937%09red/K02873%09red/K02905%09red/K02894%09red/K02893%09red/K02902%09red/K02987%09red/K02997%09red/K02932%09red/K02969%09red/K02942%09red/K02947%09red
Limonene and pinene degradation	KEGG PATHWAY	ko00903	2	78	0.0959901	0.52243	Cluster-26447.173447|Cluster-26447.134519	K00517|K00517|	| |	||	E1.14.-.-|E1.14.-.-|	http://www.genome.jp/kegg-bin/show_pathway?ko00903/K00517%09red
Tropane, piperidine and pyridine alkaloid biosynthesis	KEGG PATHWAY	ko00960	3	173	0.108124	0.52243	Cluster-26447.118364|Cluster-26447.63369|Cluster-26447.100703	K08081|K00817|K00276|	| | |	|||	TR1|hisC|AOC3, AOC2, tynA|	http://www.genome.jp/kegg-bin/show_pathway?ko00960/K00276%09red/K08081%09red/K00817%09red
Vitamin B6 metabolism	KEGG PATHWAY	ko00750	2	85	0.110397	0.52243	Cluster-26447.98682|Cluster-26447.124528	K06215|K00868|	| |	||	pdxS, pdx1|pdxK, pdxY|	http://www.genome.jp/kegg-bin/show_pathway?ko00750/K06215%09red/K00868%09red
Flavone and flavonol biosynthesis	KEGG PATHWAY	ko00944	1	17	0.11093	0.52243	Cluster-26447.71594	K05279|	|	|	E2.1.1.76|	http://www.genome.jp/kegg-bin/show_pathway?ko00944/K05279%09red
Fructose and mannose metabolism	KEGG PATHWAY	ko00051	8	729	0.111155	0.52243	Cluster-26447.40378|Cluster-26447.174982|Cluster-26447.109344|Cluster-26447.205299|Cluster-26447.109701|Cluster-26447.40760|Cluster-26447.109407|Cluster-26447.89654	K00844|K05305|K03841|K00847|K01103|K02377|K03841|K01805|	| | | | | | | |	||||||||	HK|FUK|FBP, fbp|E2.7.1.4, scrK|PFKFB3|TSTA3, fcl|FBP, fbp|xylA|	http://www.genome.jp/kegg-bin/show_pathway?ko00051/K03841%09red/K02377%09red/K00844%09red/K01103%09red/K01805%09red/K00847%09red/K05305%09red
Glyoxylate and dicarboxylate metabolism	KEGG PATHWAY	ko00630	11	1116	0.121412	0.543464	Cluster-26447.109484|Cluster-26447.110198|Cluster-26447.53809|Cluster-26447.84808|Cluster-26447.113958|Cluster-26447.107398|Cluster-26447.68560|Cluster-26447.155076|Cluster-26447.110207|Cluster-26447.125274|Cluster-26447.114501	K11517|K11517|K00026|K00600|K15919|K00600|K01647|K15919|K15919|K15918|K01681|	| | | | | | | | | | |	|||||||||||	HAO|HAO|MDH2|glyA, SHMT|HPR2|glyA, SHMT|CS, gltA|HPR2|HPR2|GLYK|ACO, acnA|	http://www.genome.jp/kegg-bin/show_pathway?ko00630/K15919%09red/K15918%09red/K11517%09red/K01681%09red/K00600%09red/K00026%09red/K01647%09red
Arachidonic acid metabolism	KEGG PATHWAY	ko00590	2	101	0.145159	0.607367	Cluster-26447.86326|Cluster-26447.83904	K14674|K14674|	| |	||	TGL4|TGL4|	http://www.genome.jp/kegg-bin/show_pathway?ko00590/K14674%09red
One carbon pool by folate	KEGG PATHWAY	ko00670	3	201	0.148611	0.607367	Cluster-26447.84808|Cluster-26447.107398|Cluster-26447.174125	K00600|K00600|K01934|	| | |	|||	glyA, SHMT|glyA, SHMT|MTHFS|	http://www.genome.jp/kegg-bin/show_pathway?ko00670/K01934%09red/K00600%09red
Non-homologous end-joining	KEGG PATHWAY	ko03450	2	126	0.202951	0.744903	Cluster-26447.174995|Cluster-26447.110133	K10865|K10865|	| |	||	MRE11|MRE11|	http://www.genome.jp/kegg-bin/show_pathway?ko03450/K10865%09red
Linoleic acid metabolism	KEGG PATHWAY	ko00591	2	126	0.202951	0.744903	Cluster-26447.86326|Cluster-26447.83904	K14674|K14674|	| |	||	TGL4|TGL4|	http://www.genome.jp/kegg-bin/show_pathway?ko00591/K14674%09red
Nitrogen metabolism	KEGG PATHWAY	ko00910	4	354	0.206037	0.744903	Cluster-26447.166722|Cluster-26447.120083|Cluster-26447.86003|Cluster-26447.110206	K00262|K10534|K01501|K01673|	| | | |	||||	E1.4.1.4, gdhA|NR|E3.5.5.1|cynT, can|	http://www.genome.jp/kegg-bin/show_pathway?ko00910/K01673%09red/K00262%09red/K01501%09red/K10534%09red
Starch and sucrose metabolism	KEGG PATHWAY	ko00500	12	1408	0.218585	0.760999	Cluster-26447.96215|Cluster-26447.40378|Cluster-26447.115151|Cluster-26447.204715|Cluster-26447.204570|Cluster-26447.113691|Cluster-26447.135627|Cluster-26447.205299|Cluster-26447.135625|Cluster-26447.26073|Cluster-26447.35100|Cluster-26447.26075	K00703|K00844|K01188|K01193|K08679|K01188|K01177|K00847|K01177|K05349|K01087|K05349|	| | | | | | | | | | | |	||||||||||||	E2.4.1.21, glgA|HK|E3.2.1.21|E3.2.1.26, sacA|E5.1.3.6|E3.2.1.21|E3.2.1.2|E2.7.1.4, scrK|E3.2.1.2|bglX|otsB|bglX|	http://www.genome.jp/kegg-bin/show_pathway?ko00500/K01193%09red/K00847%09red/K01177%09red/K01188%09red/K00703%09red/K08679%09red/K05349%09red/K00844%09red/K01087%09red
Flavonoid biosynthesis	KEGG PATHWAY	ko00941	2	142	0.241134	0.774849	Cluster-26447.146841|Cluster-26447.933	K09754|K13065|	| |	||	CYP98A3, C3'H|E2.3.1.133, HCT|	http://www.genome.jp/kegg-bin/show_pathway?ko00941/K09754%09red/K13065%09red
Photosynthesis - antenna proteins	KEGG PATHWAY	ko00196	2	143	0.243535	0.774849	Cluster-26447.97197|Cluster-26447.105197	K08910|K08909|	| |	||	LHCA4|LHCA3|	http://www.genome.jp/kegg-bin/show_pathway?ko00196/K08910%09red/K08909%09red
Biosynthesis of unsaturated fatty acids	KEGG PATHWAY	ko01040	3	261	0.247292	0.774849	Cluster-26447.135732|Cluster-26447.64869|Cluster-26447.130231	K00232|K00232|K10251|	| | |	|||	E1.3.3.6, ACOX1, ACOX3|E1.3.3.6, ACOX1, ACOX3|HSD17B12, KAR, IFA38|	http://www.genome.jp/kegg-bin/show_pathway?ko01040/K00232%09red/K10251%09red
Steroid biosynthesis	KEGG PATHWAY	ko00100	3	267	0.257718	0.781468	Cluster-26447.86326|Cluster-26447.83904|Cluster-26447.85633	K14674|K14674|K00227|	| | |	|||	TGL4|TGL4|SC5DL, ERG3|	http://www.genome.jp/kegg-bin/show_pathway?ko00100/K00227%09red/K14674%09red
Galactose metabolism	KEGG PATHWAY	ko00052	5	543	0.286701	0.838928	Cluster-26447.204715|Cluster-26447.205321|Cluster-26447.158588|Cluster-26447.112768|Cluster-26447.40378	K01193|K01785|K01784|K01784|K00844|	| | | | |	|||||	E3.2.1.26, sacA|galM, GALM|galE, GALE|galE, GALE|HK|	http://www.genome.jp/kegg-bin/show_pathway?ko00052/K01193%09red/K01785%09red/K01784%09red/K00844%09red
Ribosome biogenesis in eukaryotes	KEGG PATHWAY	ko03008	8	957	0.294517	0.838928	Cluster-26447.179300|Cluster-26447.57455|Cluster-26447.15160|Cluster-26447.156490|Cluster-26447.156505|Cluster-26447.79081|Cluster-26447.90419|Cluster-26447.135089	K14544|K14555|K14565|K03264|K03264|K13288|K03097|K12619|	| | | | | | | |	||||||||	UTP22, NOL6|UTP13, TBL3|NOP58|EIF6|EIF6|orn, REX2, REXO2|CSNK2A|XRN2, RAT1|	http://www.genome.jp/kegg-bin/show_pathway?ko03008/K14565%09red/K13288%09red/K14555%09red/K03097%09red/K14544%09red/K03264%09red/K12619%09red
Fatty acid elongation	KEGG PATHWAY	ko00062	2	181	0.334561	0.903326	Cluster-26447.106982|Cluster-26447.130231	K01074|K10251|	| |	||	PPT|HSD17B12, KAR, IFA38|	http://www.genome.jp/kegg-bin/show_pathway?ko00062/K01074%09red/K10251%09red
Protein processing in endoplasmic reticulum	KEGG PATHWAY	ko04141	14	1864	0.340899	0.903326	Cluster-26447.181649|Cluster-26447.102121|Cluster-26447.181675|Cluster-26447.13079|Cluster-26447.103432|Cluster-26447.63019|Cluster-26447.75058|Cluster-26447.112257|Cluster-26447.102118|Cluster-26447.35196|Cluster-26447.68348|Cluster-26447.204353|Cluster-26447.163186|Cluster-26447.88215	K05546|K14003|K10666|K13525|K14003|K12670|K09518|K08057|K14003|K14007|K10666|K13525|K08288|K09580|	| | | | | | | | | | | | | |	||||||||||||||	GANAB|PREB, SEC12|RNF5|VCP, CDC48|PREB, SEC12|WBP1|DNAJB12|CALR|PREB, SEC12|SEC24|RNF5|VCP, CDC48|PRKCSH|PDIA1, P4HB|	http://www.genome.jp/kegg-bin/show_pathway?ko04141/K13525%09red/K12670%09red/K10666%09red/K09518%09red/K14007%09red/K08057%09red/K08288%09red/K14003%09red/K05546%09red/K09580%09red
beta-Alanine metabolism	KEGG PATHWAY	ko00410	3	317	0.345955	0.903326	Cluster-26447.169312|Cluster-26447.36804|Cluster-26447.100703	K17839|K17839|K00276|	| | |	|||	PAO4, PAO3, PAO2|PAO4, PAO3, PAO2|AOC3, AOC2, tynA|	http://www.genome.jp/kegg-bin/show_pathway?ko00410/K00276%09red/K17839%09red
Plant-pathogen interaction	KEGG PATHWAY	ko04626	11	1477	0.377216	0.958332	Cluster-26447.130453|Cluster-26447.109208|Cluster-1202.0|Cluster-1202.1|Cluster-26447.111541|Cluster-26447.23303|Cluster-26447.209279|Cluster-4183.0|Cluster-26447.126825|Cluster-26447.117379|Cluster-26447.74407	K13457|K13449|K13457|K13457|K13449|K13449|K13457|K13457|K13428|K13449|K13457|	| | | | | | | | | | |	|||||||||||	RPM1, RPS3|PR1|RPM1, RPS3|RPM1, RPS3|PR1|PR1|RPM1, RPS3|RPM1, RPS3|EFR|PR1|RPM1, RPS3|	http://www.genome.jp/kegg-bin/show_pathway?ko04626/K13428%09red/K13449%09red/K13457%09red
Tryptophan metabolism	KEGG PATHWAY	ko00380	2	210	0.401939	0.991144	Cluster-26447.184919|Cluster-26447.86003	K11817|K01501|	| |	||	AAO1_2|E3.5.5.1|	http://www.genome.jp/kegg-bin/show_pathway?ko00380/K11817%09red/K01501%09red
Pentose phosphate pathway	KEGG PATHWAY	ko00030	5	645	0.416668	0.991144	Cluster-26447.109407|Cluster-26447.109452|Cluster-26447.109344|Cluster-26447.153858|Cluster-26447.60729	K03841|K00036|K03841|K00033|K00036|	| | | | |	|||||	FBP, fbp|G6PD, zwf|FBP, fbp|PGD, gnd, gntZ|G6PD, zwf|	http://www.genome.jp/kegg-bin/show_pathway?ko00030/K00036%09red/K03841%09red/K00033%09red
Alanine, aspartate and glutamate metabolism	KEGG PATHWAY	ko00250	5	649	0.421764	0.991144	Cluster-26447.166722|Cluster-26447.82871|Cluster-26447.200419|Cluster-26447.88622|Cluster-26447.200422	K00262|K01956|K01953|K01956|K01953|	| | | | |	|||||	E1.4.1.4, gdhA|carA, CPA1|asnB, ASNS|carA, CPA1|asnB, ASNS|	http://www.genome.jp/kegg-bin/show_pathway?ko00250/K01956%09red/K00262%09red/K01953%09red
Ether lipid metabolism	KEGG PATHWAY	ko00565	2	236	0.459501	0.993908	Cluster-26447.86326|Cluster-26447.83904	K14674|K14674|	| |	||	TGL4|TGL4|	http://www.genome.jp/kegg-bin/show_pathway?ko00565/K14674%09red
Carbon fixation in photosynthetic organisms	KEGG PATHWAY	ko00710	7	978	0.46036	0.993908	Cluster-26447.103408|Cluster-26447.91395|Cluster-26447.109344|Cluster-26447.53809|Cluster-26447.117840|Cluster-26447.42067|Cluster-26447.109407	K05298|K00029|K03841|K00026|K00029|K00029|K03841|	| | | | | | |	|||||||	GAPA|E1.1.1.40, maeB|FBP, fbp|MDH2|E1.1.1.40, maeB|E1.1.1.40, maeB|FBP, fbp|	http://www.genome.jp/kegg-bin/show_pathway?ko00710/K03841%09red/K00026%09red/K00029%09red/K05298%09red
Amino sugar and nucleotide sugar metabolism	KEGG PATHWAY	ko00520	8	1130	0.462649	0.993908	Cluster-26447.40378|Cluster-26447.37151|Cluster-26447.158588|Cluster-26447.174982|Cluster-26447.112768|Cluster-26447.204570|Cluster-26447.205299|Cluster-26447.40760	K00844|K00326|K01784|K05305|K01784|K08679|K00847|K02377|	| | | | | | | |	||||||||	HK|E1.6.2.2|galE, GALE|FUK|galE, GALE|E5.1.3.6|E2.7.1.4, scrK|TSTA3, fcl|	http://www.genome.jp/kegg-bin/show_pathway?ko00520/K02377%09red/K00844%09red/K08679%09red/K05305%09red/K01784%09red/K00847%09red/K00326%09red
Thiamine metabolism	KEGG PATHWAY	ko00730	1	99	0.479859	0.993908	Cluster-26447.84141	K00949|	|	|	thiN, TPK1, THI80|	http://www.genome.jp/kegg-bin/show_pathway?ko00730/K00949%09red
Citrate cycle (TCA cycle)	KEGG PATHWAY	ko00020	4	554	0.492728	0.993908	Cluster-26447.77096|Cluster-26447.53809|Cluster-26447.114501|Cluster-26447.68560	K00236|K00026|K01681|K01647|	| | | |	||||	SDHC, SDH3|MDH2|ACO, acnA|CS, gltA|	http://www.genome.jp/kegg-bin/show_pathway?ko00020/K00026%09red/K01647%09red/K00236%09red/K01681%09red
Pyruvate metabolism	KEGG PATHWAY	ko00620	6	881	0.518785	0.993908	Cluster-26447.53809|Cluster-26447.90256|Cluster-26447.91395|Cluster-26447.117840|Cluster-26447.42067|Cluster-26447.105025	K00026|K01895|K00029|K00029|K00029|K01069|	| | | | | |	||||||	MDH2|ACSS, acs|E1.1.1.40, maeB|E1.1.1.40, maeB|E1.1.1.40, maeB|E3.1.2.6, gloB|	http://www.genome.jp/kegg-bin/show_pathway?ko00620/K01069%09red/K00026%09red/K00029%09red/K01895%09red
Terpenoid backbone biosynthesis	KEGG PATHWAY	ko00900	4	589	0.540206	0.993908	Cluster-26447.119474|Cluster-26447.173555|Cluster-26447.107517|Cluster-26447.83472	K06013|K05955|K03526|K15889|	| | | |	||||	STE24|FNTA|gcpE, ispG|PCME|	http://www.genome.jp/kegg-bin/show_pathway?ko00900/K15889%09red/K06013%09red/K05955%09red/K03526%09red
Riboflavin metabolism	KEGG PATHWAY	ko00740	1	118	0.540664	0.993908	Cluster-26447.162961	K11752|	|	|	ribD|	http://www.genome.jp/kegg-bin/show_pathway?ko00740/K11752%09red
Taurine and hypotaurine metabolism	KEGG PATHWAY	ko00430	1	123	0.55545	0.993908	Cluster-26447.63027	K10712|	|	|	ADO|	http://www.genome.jp/kegg-bin/show_pathway?ko00430/K10712%09red
Pyrimidine metabolism	KEGG PATHWAY	ko00240	7	1083	0.566445	0.993908	Cluster-26447.119064|Cluster-26447.3666|Cluster-26447.88622|Cluster-26447.141736|Cluster-26447.181772|Cluster-26447.82871|Cluster-26447.162631	K00962|K02320|K01956|K03012|K03010|K01956|K01489|	| | | | | | |	|||||||	pnp, PNPT1|POLA1|carA, CPA1|RPB4, POLR2D|RPB2, POLR2B|carA, CPA1|cdd, CDA|	http://www.genome.jp/kegg-bin/show_pathway?ko00240/K00962%09red/K01956%09red/K02320%09red/K03010%09red/K03012%09red/K01489%09red
Arginine and proline metabolism	KEGG PATHWAY	ko00330	3	450	0.566798	0.993908	Cluster-26447.90027|Cluster-26447.169312|Cluster-26447.36804	K01259|K17839|K17839|	| | |	|||	pip|PAO4, PAO3, PAO2|PAO4, PAO3, PAO2|	http://www.genome.jp/kegg-bin/show_pathway?ko00330/K17839%09red/K01259%09red
Circadian rhythm - plant	KEGG PATHWAY	ko04712	3	463	0.585927	0.993908	Cluster-26447.114702|Cluster-26447.90419|Cluster-26447.86266	K12130|K03097|K10143|	| | |	|||	PRR5|CSNK2A|RFWD2, COP1|	http://www.genome.jp/kegg-bin/show_pathway?ko04712/K10143%09red/K03097%09red/K12130%09red
Glycerolipid metabolism	KEGG PATHWAY	ko00561	4	638	0.602646	0.993908	Cluster-26447.125274|Cluster-26447.86326|Cluster-26447.83904|Cluster-26447.138049	K15918|K14674|K14674|K00630|	| | | |	||||	GLYK|TGL4|TGL4|ATS1|	http://www.genome.jp/kegg-bin/show_pathway?ko00561/K14674%09red/K00630%09red/K15918%09red
Ascorbate and aldarate metabolism	KEGG PATHWAY	ko00053	2	310	0.603947	0.993908	Cluster-26447.111320|Cluster-26447.116962	K14190|K00434|	| |	||	VTC2_5|E1.11.1.11|	http://www.genome.jp/kegg-bin/show_pathway?ko00053/K14190%09red/K00434%09red
Oxidative phosphorylation	KEGG PATHWAY	ko00190	6	969	0.610653	0.993908	Cluster-26447.77096|Cluster-26447.180581|Cluster-26447.120543|Cluster-26447.77712|Cluster-26447.91523|Cluster-26447.159509	K00236|K00413|K02134|K02133|K03949|K03955|	| | | | | |	||||||	SDHC, SDH3|CYC1, CYT1, petC|ATPeF1D, ATP5D, ATP16|ATPeF1B, ATP5B, ATP2|NDUFA5|NDUFAB1|	http://www.genome.jp/kegg-bin/show_pathway?ko00190/K03949%09red/K00413%09red/K03955%09red/K00236%09red/K02133%09red/K02134%09red
RNA polymerase	KEGG PATHWAY	ko03020	2	339	0.652035	0.993908	Cluster-26447.141736|Cluster-26447.181772	K03012|K03010|	| |	||	RPB4, POLR2D|RPB2, POLR2B|	http://www.genome.jp/kegg-bin/show_pathway?ko03020/K03010%09red/K03012%09red
Isoquinoline alkaloid biosynthesis	KEGG PATHWAY	ko00950	1	170	0.673199	0.993908	Cluster-26447.100703	K00276|	|	|	AOC3, AOC2, tynA|	http://www.genome.jp/kegg-bin/show_pathway?ko00950/K00276%09red
Aminoacyl-tRNA biosynthesis	KEGG PATHWAY	ko00970	5	879	0.683464	0.993908	Cluster-26447.63553|Cluster-26447.103544|Cluster-26447.113937|Cluster-26447.87637|Cluster-26447.146217	K01867|K01872|K01881|K01874|K01881|	| | | | |	|||||	WARS, trpS|AARS, alaS|PARS, proS|MARS, metG|PARS, proS|	http://www.genome.jp/kegg-bin/show_pathway?ko00970/K01881%09red/K01872%09red/K01874%09red/K01867%09red
DNA replication	KEGG PATHWAY	ko03030	3	541	0.68891	0.993908	Cluster-26447.3666|Cluster-26447.9102|Cluster-26447.30922	K02320|K10755|K07466|	| | |	|||	POLA1|RFC2_4|RFA1, RPA1, rpa|	http://www.genome.jp/kegg-bin/show_pathway?ko03030/K02320%09red/K07466%09red/K10755%09red
Glycolysis / Gluconeogenesis	KEGG PATHWAY	ko00010	7	1240	0.704222	0.993908	Cluster-26447.40378|Cluster-26447.90256|Cluster-26447.109344|Cluster-26447.205321|Cluster-26447.108565|Cluster-26447.109407|Cluster-26447.137866	K00844|K01895|K03841|K01785|K01689|K03841|K01792|	| | | | | | |	|||||||	HK|ACSS, acs|FBP, fbp|galM, GALM|ENO, eno|FBP, fbp|E5.1.3.15|	http://www.genome.jp/kegg-bin/show_pathway?ko00010/K03841%09red/K00844%09red/K01792%09red/K01689%09red/K01785%09red/K01895%09red
Phenylalanine metabolism	KEGG PATHWAY	ko00360	2	376	0.706507	0.993908	Cluster-26447.63369|Cluster-26447.100703	K00817|K00276|	| |	||	hisC|AOC3, AOC2, tynA|	http://www.genome.jp/kegg-bin/show_pathway?ko00360/K00276%09red/K00817%09red
Other glycan degradation	KEGG PATHWAY	ko00511	1	197	0.72618	0.993908	Cluster-26447.120331	K01191|	|	|	E3.2.1.24|	http://www.genome.jp/kegg-bin/show_pathway?ko00511/K01191%09red
Histidine metabolism	KEGG PATHWAY	ko00340	1	198	0.727968	0.993908	Cluster-26447.63369	K00817|	|	|	hisC|	http://www.genome.jp/kegg-bin/show_pathway?ko00340/K00817%09red
Selenocompound metabolism	KEGG PATHWAY	ko00450	1	207	0.743548	0.993908	Cluster-26447.87637	K01874|	|	|	MARS, metG|	http://www.genome.jp/kegg-bin/show_pathway?ko00450/K01874%09red
Ubiquinone and other terpenoid-quinone biosynthesis	KEGG PATHWAY	ko00130	2	405	0.744077	0.993908	Cluster-26447.127427|Cluster-26447.97817	K05928|K05928|	| |	||	E2.1.1.95|E2.1.1.95|	http://www.genome.jp/kegg-bin/show_pathway?ko00130/K05928%09red
Tyrosine metabolism	KEGG PATHWAY	ko00350	2	417	0.75838	0.993908	Cluster-26447.63369|Cluster-26447.100703	K00817|K00276|	| |	||	hisC|AOC3, AOC2, tynA|	http://www.genome.jp/kegg-bin/show_pathway?ko00350/K00276%09red/K00817%09red
Sulfur relay system	KEGG PATHWAY	ko04122	1	228	0.776526	0.993908	Cluster-26447.200976	K14168|	|	|	CTU1, NCS6|	http://www.genome.jp/kegg-bin/show_pathway?ko04122/K14168%09red
Pentose and glucuronate interconversions	KEGG PATHWAY	ko00040	1	239	0.792076	0.993908	Cluster-26447.89654	K01805|	|	|	xylA|	http://www.genome.jp/kegg-bin/show_pathway?ko00040/K01805%09red
Mismatch repair	KEGG PATHWAY	ko03430	2	465	0.808871	0.993908	Cluster-26447.30922|Cluster-26447.9102	K07466|K10755|	| |	||	RFA1, RPA1, rpa|RFC2_4|	http://www.genome.jp/kegg-bin/show_pathway?ko03430/K07466%09red/K10755%09red
Inositol phosphate metabolism	KEGG PATHWAY	ko00562	2	492	0.832952	0.993908	Cluster-26447.115578|Cluster-26447.155828	K00913|K00913|	| |	||	ITPK1|ITPK1|	http://www.genome.jp/kegg-bin/show_pathway?ko00562/K00913%09red
N-Glycan biosynthesis	KEGG PATHWAY	ko00510	2	499	0.838732	0.993908	Cluster-26447.181649|Cluster-26447.63019	K05546|K12670|	| |	||	GANAB|WBP1|	http://www.genome.jp/kegg-bin/show_pathway?ko00510/K12670%09red/K05546%09red
Propanoate metabolism	KEGG PATHWAY	ko00640	1	285	0.846233	0.993908	Cluster-26447.90256	K01895|	|	|	ACSS, acs|	http://www.genome.jp/kegg-bin/show_pathway?ko00640/K01895%09red
Fatty acid degradation	KEGG PATHWAY	ko00071	2	509	0.846677	0.993908	Cluster-26447.135732|Cluster-26447.64869	K00232|K00232|	| |	||	E1.3.3.6, ACOX1, ACOX3|E1.3.3.6, ACOX1, ACOX3|	http://www.genome.jp/kegg-bin/show_pathway?ko00071/K00232%09red
Proteasome	KEGG PATHWAY	ko03050	2	513	0.849754	0.993908	Cluster-26447.70052|Cluster-26447.114515	K02736|K03028|	| |	||	PSMB4|PSMD2, RPN1|	http://www.genome.jp/kegg-bin/show_pathway?ko03050/K03028%09red/K02736%09red
Pantothenate and CoA biosynthesis	KEGG PATHWAY	ko00770	1	289	0.850217	0.993908	Cluster-26447.118735	K09680|	|	|	coaW|	http://www.genome.jp/kegg-bin/show_pathway?ko00770/K09680%09red
Homologous recombination	KEGG PATHWAY	ko03440	3	735	0.86034	0.993908	Cluster-26447.30922|Cluster-26447.174995|Cluster-26447.110133	K07466|K10865|K10865|	| | |	|||	RFA1, RPA1, rpa|MRE11|MRE11|	http://www.genome.jp/kegg-bin/show_pathway?ko03440/K10865%09red/K07466%09red
Carotenoid biosynthesis	KEGG PATHWAY	ko00906	1	310	0.869503	0.993908	Cluster-26447.123064	K02293|	|	|	PDS, crtP|	http://www.genome.jp/kegg-bin/show_pathway?ko00906/K02293%09red
Sphingolipid metabolism	KEGG PATHWAY	ko00600	1	323	0.880179	0.993908	Cluster-26447.149113	K01634|	|	|	SGPL1, DPL1|	http://www.genome.jp/kegg-bin/show_pathway?ko00600/K01634%09red
Sulfur metabolism	KEGG PATHWAY	ko00920	1	343	0.894927	0.993908	Cluster-26447.97798	K00387|	|	|	SUOX|	http://www.genome.jp/kegg-bin/show_pathway?ko00920/K00387%09red
Nucleotide excision repair	KEGG PATHWAY	ko03420	2	690	0.940696	0.993908	Cluster-26447.30922|Cluster-26447.9102	K07466|K10755|	| |	||	RFA1, RPA1, rpa|RFC2_4|	http://www.genome.jp/kegg-bin/show_pathway?ko03420/K07466%09red/K10755%09red
Glycerophospholipid metabolism	KEGG PATHWAY	ko00564	3	934	0.944202	0.993908	Cluster-26447.86326|Cluster-26447.83904|Cluster-26447.138049	K14674|K14674|K00630|	| | |	|||	TGL4|TGL4|ATS1|	http://www.genome.jp/kegg-bin/show_pathway?ko00564/K14674%09red/K00630%09red
Porphyrin and chlorophyll metabolism	KEGG PATHWAY	ko00860	1	451	0.948342	0.993908	Cluster-26447.102068	K01698|	|	|	hemB, ALAD|	http://www.genome.jp/kegg-bin/show_pathway?ko00860/K01698%09red
RNA transport	KEGG PATHWAY	ko03013	6	1636	0.957397	0.993908	Cluster-26447.64499|Cluster-26447.92151|Cluster-26447.61353|Cluster-26447.103862|Cluster-26447.8795|Cluster-26447.158690	K00784|K14303|K03246|K12812|K12878|K14293|	| | | | | |	||||||	rnz|NUP160, NUP120|EIF3I|UAP56, BAT1, SUB2|THOC1|KPNB1|	http://www.genome.jp/kegg-bin/show_pathway?ko03013/K14303%09red/K00784%09red/K12812%09red/K03246%09red/K12878%09red/K14293%09red
Phagosome	KEGG PATHWAY	ko04145	2	752	0.957703	0.993908	Cluster-26447.112257|Cluster-26447.85837	K08057|K07889|	| |	||	CALR|RAB5C|	http://www.genome.jp/kegg-bin/show_pathway?ko04145/K08057%09red/K07889%09red
mRNA surveillance pathway	KEGG PATHWAY	ko03015	4	1223	0.959167	0.993908	Cluster-26447.13697|Cluster-26447.205786|Cluster-26447.103862|Cluster-26447.102600	K14402|K11583|K12812|K06269|	| | | |	||||	CPSF2, CFT2|PPP2R3|UAP56, BAT1, SUB2|PPP1C|	http://www.genome.jp/kegg-bin/show_pathway?ko03015/K06269%09red/K11583%09red/K14402%09red/K12812%09red
Basal transcription factors	KEGG PATHWAY	ko03022	1	495	0.961331	0.993908	Cluster-26447.159813	K03131|	|	|	TAF6|	http://www.genome.jp/kegg-bin/show_pathway?ko03022/K03131%09red
Regulation of autophagy	KEGG PATHWAY	ko04140	1	498	0.962088	0.993908	Cluster-26447.118404	K08341|	|	|	GABARAP, ATG8, LC3|	http://www.genome.jp/kegg-bin/show_pathway?ko04140/K08341%09red
Ubiquitin mediated proteolysis	KEGG PATHWAY	ko04120	4	1269	0.966852	0.993908	Cluster-26447.123882|Cluster-26447.86266|Cluster-26447.110123|Cluster-26447.63613	K04506|K10143|K10685|K10579|	| | | |	||||	SIAH1|RFWD2, COP1|UBLE1B, SAE2, UBA2|UBE2M, UBC12|	http://www.genome.jp/kegg-bin/show_pathway?ko04120/K04506%09red/K10143%09red/K10685%09red/K10579%09red
RNA degradation	KEGG PATHWAY	ko03018	4	1285	0.969194	0.993908	Cluster-26447.108565|Cluster-26447.188977|Cluster-26447.135089|Cluster-26447.119064	K01689|K12600|K12619|K00962|	| | | |	||||	ENO, eno|SKI3, TTC37|XRN2, RAT1|pnp, PNPT1|	http://www.genome.jp/kegg-bin/show_pathway?ko03018/K12619%09red/K12600%09red/K00962%09red/K01689%09red
Valine, leucine and isoleucine degradation	KEGG PATHWAY	ko00280	1	540	0.971251	0.993908	Cluster-26447.724	K00020|	|	|	E1.1.1.31, mmsB|	http://www.genome.jp/kegg-bin/show_pathway?ko00280/K00020%09red
Purine metabolism	KEGG PATHWAY	ko00230	4	1404	0.982335	0.993908	Cluster-26447.141736|Cluster-26447.3666|Cluster-26447.181772|Cluster-26447.119064	K03012|K02320|K03010|K00962|	| | | |	||||	RPB4, POLR2D|POLA1|RPB2, POLR2B|pnp, PNPT1|	http://www.genome.jp/kegg-bin/show_pathway?ko00230/K02320%09red/K03010%09red/K00962%09red/K03012%09red
Endocytosis	KEGG PATHWAY	ko04144	4	1479	0.987674	0.993908	Cluster-26447.125111|Cluster-26447.85837|Cluster-26447.32109|Cluster-26447.160775	K18465|K07889|K12486|K12493|	| | | |	||||	MRT43, SWIP|RAB5C|SMAP|ARFGAP2_3|	http://www.genome.jp/kegg-bin/show_pathway?ko04144/K12493%09red/K12486%09red/K07889%09red/K18465%09red
Spliceosome	KEGG PATHWAY	ko03040	5	1781	0.991055	0.993908	Cluster-26447.110484|Cluster-26447.8795|Cluster-26447.150712|Cluster-26447.103862|Cluster-26447.118759	K12854|K12878|K11099|K12812|K11093|	| | | | |	|||||	SNRNP200, BRR2|THOC1|SNRPG, SMG|UAP56, BAT1, SUB2|SNRP70|	http://www.genome.jp/kegg-bin/show_pathway?ko03040/K12878%09red/K12854%09red/K11093%09red/K12812%09red/K11099%09red
Cysteine and methionine metabolism	KEGG PATHWAY	ko00270	1	775	0.993908	0.993908	Cluster-26447.53809	K00026|	|	|	MDH2|	http://www.genome.jp/kegg-bin/show_pathway?ko00270/K00026%09red

## Sheet: T300vsT0_down_KEGGenrich
Dataset S4.T300 vs T0 down-regluated KEGG enrichment. Term: The name of the enriched KEGG pathway. ID: the ID of KEGG pathway. Input number is the number of DEGs related to this KEGG pathway. Background number means the number of all the genes related to this KEGG pathway. KO: the corresponding KO number of the DEGs enriched in this pathway.Entrez_ID: the Entrez number of DEGs enriched in the pat…
Term	Database	ID	Input number	Background number	P-Value	Corrected P-Value	Input	KO	Entrez_ID	Ensembl_ID	KO_name	Hyperlink
Galactose metabolism	KEGG PATHWAY	ko00052	5	543	0.00165539	0.0877358	Cluster-26447.18422|Cluster-26447.19248|Cluster-26447.198240|Cluster-26447.155960|Cluster-26447.198243	K01193|K01193|K01193|K01785|K01193|	| | | | |	|||||	E3.2.1.26, sacA|E3.2.1.26, sacA|E3.2.1.26, sacA|galM, GALM|E3.2.1.26, sacA|	http://www.genome.jp/kegg-bin/show_pathway?ko00052/K01193%09red/K01785%09red
Starch and sucrose metabolism	KEGG PATHWAY	ko00500	7	1408	0.00643791	0.123109	Cluster-26447.151145|Cluster-26447.157914|Cluster-26447.19248|Cluster-26447.18422|Cluster-26447.198240|Cluster-26447.198243|Cluster-26447.151878	K01177|K00696|K01193|K01193|K01193|K01193|K01087|	| | | | | | |	|||||||	E3.2.1.2|E2.4.1.14|E3.2.1.26, sacA|E3.2.1.26, sacA|E3.2.1.26, sacA|E3.2.1.26, sacA|otsB|	http://www.genome.jp/kegg-bin/show_pathway?ko00500/K01193%09red/K01087%09red/K00696%09red/K01177%09red
Pyrimidine metabolism	KEGG PATHWAY	ko00240	6	1083	0.00696842	0.123109	Cluster-26447.47220|Cluster-26447.89895|Cluster-26447.3664|Cluster-26447.141024|Cluster-26447.100390|Cluster-26447.33416	K13998|K03012|K02320|K03787|K00384|K03787|	| | | | | |	||||||	DHFR-TS|RPB4, POLR2D|POLA1|surE|trxB|surE|	http://www.genome.jp/kegg-bin/show_pathway?ko00240/K00384%09red/K02320%09red/K13998%09red/K03787%09red/K03012%09red
One carbon pool by folate	KEGG PATHWAY	ko00670	2	201	0.0396388	0.441905	Cluster-26447.83871|Cluster-26447.47220	K01938|K13998|	| |	||	fhs|DHFR-TS|	http://www.genome.jp/kegg-bin/show_pathway?ko00670/K01938%09red/K13998%09red
Inositol phosphate metabolism	KEGG PATHWAY	ko00562	3	492	0.0416891	0.441905	Cluster-26447.138760|Cluster-26447.99162|Cluster-26447.128013	K15422|K19517|K00921|	| | |	|||	SAL|MIK|PIKFYVE, FAB1|	http://www.genome.jp/kegg-bin/show_pathway?ko00562/K19517%09red/K00921%09red/K15422%09red
Other types of O-glycan biosynthesis	KEGG PATHWAY	ko00514	1	35	0.0541646	0.446773	Cluster-26447.104053	K09667|	|	|	OGT|	http://www.genome.jp/kegg-bin/show_pathway?ko00514/K09667%09red
Nicotinate and nicotinamide metabolism	KEGG PATHWAY	ko00760	2	262	0.063217	0.446773	Cluster-26447.33416|Cluster-26447.141024	K03787|K03787|	| |	||	surE|surE|	http://www.genome.jp/kegg-bin/show_pathway?ko00760/K03787%09red
Purine metabolism	KEGG PATHWAY	ko00230	5	1404	0.067633	0.446773	Cluster-26447.33416|Cluster-26447.89895|Cluster-26447.3664|Cluster-26447.65165|Cluster-26447.141024	K03787|K03012|K02320|K00759|K03787|	| | | | |	|||||	surE|RPB4, POLR2D|POLA1|APRT, apt|surE|	http://www.genome.jp/kegg-bin/show_pathway?ko00230/K02320%09red/K00759%09red/K03787%09red/K03012%09red
C5-Branched dibasic acid metabolism	KEGG PATHWAY	ko00660	1	50	0.075867	0.446773	Cluster-26447.106378	K01703|	|	|	leuC|	http://www.genome.jp/kegg-bin/show_pathway?ko00660/K01703%09red
SNARE interactions in vesicular transport	KEGG PATHWAY	ko04130	2	330	0.0936469	0.496329	Cluster-26447.192004|Cluster-26447.175794	K08495|K08495|	| |	||	GOSR1, GOS1|GOSR1, GOS1|	http://www.genome.jp/kegg-bin/show_pathway?ko04130/K08495%09red
Nitrogen metabolism	KEGG PATHWAY	ko00910	2	354	0.105225	0.506994	Cluster-26447.108086|Cluster-26447.67421	K01673|K01501|	| |	||	cynT, can|E3.5.5.1|	http://www.genome.jp/kegg-bin/show_pathway?ko00910/K01673%09red/K01501%09red
mRNA surveillance pathway	KEGG PATHWAY	ko03015	4	1223	0.122529	0.50802	Cluster-26447.200402|Cluster-26447.127461|Cluster-26447.110976|Cluster-26447.145588	K06269|K03265|K14324|K06269|	| | | |	||||	PPP1C|ETF1, ERF1|SAP18|PPP1C|	http://www.genome.jp/kegg-bin/show_pathway?ko03015/K03265%09red/K06269%09red/K14324%09red
Vitamin B6 metabolism	KEGG PATHWAY	ko00750	1	85	0.124609	0.50802	Cluster-26447.141943	K05275|	|	|	E1.1.1.65|	http://www.genome.jp/kegg-bin/show_pathway?ko00750/K05275%09red
Thiamine metabolism	KEGG PATHWAY	ko00730	1	99	0.143385	0.542816	Cluster-26447.103203	K03147|	|	|	thiC|	http://www.genome.jp/kegg-bin/show_pathway?ko00730/K03147%09red
Stilbenoid, diarylheptanoid and gingerol biosynthesis	KEGG PATHWAY	ko00945	1	126	0.178479	0.619165	Cluster-26447.6211	K13065|	|	|	E2.3.1.133, HCT|	http://www.genome.jp/kegg-bin/show_pathway?ko00945/K13065%09red
Fatty acid degradation	KEGG PATHWAY	ko00071	2	509	0.187094	0.619165	Cluster-26447.73076|Cluster-26447.4034	K00121|K01897|	| |	||	frmA, ADH5, adhC|ACSL, fadD|	http://www.genome.jp/kegg-bin/show_pathway?ko00071/K01897%09red/K00121%09red
Flavonoid biosynthesis	KEGG PATHWAY	ko00941	1	142	0.1986	0.619165	Cluster-26447.6211	K13065|	|	|	E2.3.1.133, HCT|	http://www.genome.jp/kegg-bin/show_pathway?ko00941/K13065%09red
Valine, leucine and isoleucine biosynthesis	KEGG PATHWAY	ko00290	1	193	0.259538	0.668074	Cluster-26447.106378	K01703|	|	|	leuC|	http://www.genome.jp/kegg-bin/show_pathway?ko00290/K01703%09red
Cell cycle - Caulobacter	KEGG PATHWAY	ko04112	1	195	0.261832	0.668074	Cluster-26447.106543	K01358|	|	|	clpP, CLPP|	http://www.genome.jp/kegg-bin/show_pathway?ko04112/K01358%09red
Histidine metabolism	KEGG PATHWAY	ko00340	1	198	0.265259	0.668074	Cluster-26447.99121	K00765|	|	|	hisG|	http://www.genome.jp/kegg-bin/show_pathway?ko00340/K00765%09red
Selenocompound metabolism	KEGG PATHWAY	ko00450	1	207	0.275448	0.668074	Cluster-26447.100390	K00384|	|	|	trxB|	http://www.genome.jp/kegg-bin/show_pathway?ko00450/K00384%09red
Tryptophan metabolism	KEGG PATHWAY	ko00380	1	210	0.278813	0.668074	Cluster-26447.67421	K01501|	|	|	E3.5.5.1|	http://www.genome.jp/kegg-bin/show_pathway?ko00380/K01501%09red
Folate biosynthesis	KEGG PATHWAY	ko00790	1	220	0.289919	0.668074	Cluster-26447.47220	K13998|	|	|	DHFR-TS|	http://www.genome.jp/kegg-bin/show_pathway?ko00790/K13998%09red
RNA degradation	KEGG PATHWAY	ko03018	3	1285	0.320635	0.689286	Cluster-26447.135085|Cluster-26447.144176|Cluster-26447.89531	K03514|K04077|K14442|	| | |	|||	PAPD5_7, TRF4|groEL, HSPD1|DHX36, RHAU|	http://www.genome.jp/kegg-bin/show_pathway?ko03018/K03514%09red/K04077%09red/K14442%09red
Phagosome	KEGG PATHWAY	ko04145	2	752	0.325135	0.689286	Cluster-26447.18539|Cluster-26447.128013	K10956|K00921|	| |	||	SEC61A|PIKFYVE, FAB1|	http://www.genome.jp/kegg-bin/show_pathway?ko04145/K00921%09red/K10956%09red
Steroid biosynthesis	KEGG PATHWAY	ko00100	1	267	0.339891	0.692855	Cluster-26447.85629	K00227|	|	|	SC5DL, ERG3|	http://www.genome.jp/kegg-bin/show_pathway?ko00100/K00227%09red
Phenylpropanoid biosynthesis	KEGG PATHWAY	ko00940	2	868	0.389759	0.744654	Cluster-26447.116787|Cluster-26447.6211	K00430|K13065|	| |	||	E1.11.1.7|E2.3.1.133, HCT|	http://www.genome.jp/kegg-bin/show_pathway?ko00940/K00430%09red/K13065%09red
RNA polymerase	KEGG PATHWAY	ko03020	1	339	0.409775	0.744654	Cluster-26447.89895	K03012|	|	|	RPB4, POLR2D|	http://www.genome.jp/kegg-bin/show_pathway?ko03020/K03012%09red
Sulfur metabolism	KEGG PATHWAY	ko00920	1	343	0.413435	0.744654	Cluster-26447.138760	K15422|	|	|	SAL|	http://www.genome.jp/kegg-bin/show_pathway?ko00920/K15422%09red
Fatty acid biosynthesis	KEGG PATHWAY	ko00061	1	394	0.458179	0.744654	Cluster-26447.4034	K01897|	|	|	ACSL, fadD|	http://www.genome.jp/kegg-bin/show_pathway?ko00061/K01897%09red
RNA transport	KEGG PATHWAY	ko03013	3	1636	0.466475	0.744654	Cluster-26447.165532|Cluster-26447.64495|Cluster-26447.110976	K03239|K00784|K14324|	| | |	|||	EIF2B1|rnz|SAP18|	http://www.genome.jp/kegg-bin/show_pathway?ko03013/K03239%09red/K00784%09red/K14324%09red
Tyrosine metabolism	KEGG PATHWAY	ko00350	1	417	0.477237	0.744654	Cluster-26447.73076	K00121|	|	|	frmA, ADH5, adhC|	http://www.genome.jp/kegg-bin/show_pathway?ko00350/K00121%09red
Cyanoamino acid metabolism	KEGG PATHWAY	ko00460	1	428	0.486115	0.744654	Cluster-26447.67421	K01501|	|	|	E3.5.5.1|	http://www.genome.jp/kegg-bin/show_pathway?ko00460/K01501%09red
Arginine and proline metabolism	KEGG PATHWAY	ko00330	1	450	0.503427	0.744654	Cluster-26447.198808	K01583|	|	|	E4.1.1.19|	http://www.genome.jp/kegg-bin/show_pathway?ko00330/K01583%09red
Spliceosome	KEGG PATHWAY	ko03040	3	1781	0.523008	0.744654	Cluster-26447.215641|Cluster-26447.15114|Cluster-26447.19609	K12820|K12865|K12831|	| | |	|||	DHX15, PRP43|PQBP1, NPW38|SF3B4, SAP49|	http://www.genome.jp/kegg-bin/show_pathway?ko03040/K12831%09red/K12820%09red/K12865%09red
N-Glycan biosynthesis	KEGG PATHWAY	ko00510	1	499	0.539939	0.744654	Cluster-26447.125113	K00737|	|	|	MGAT3|	http://www.genome.jp/kegg-bin/show_pathway?ko00510/K00737%09red
Protein export	KEGG PATHWAY	ko03060	1	529	0.560968	0.744654	Cluster-26447.18539	K10956|	|	|	SEC61A|	http://www.genome.jp/kegg-bin/show_pathway?ko03060/K10956%09red
DNA replication	KEGG PATHWAY	ko03030	1	541	0.569111	0.744654	Cluster-26447.3664	K02320|	|	|	POLA1|	http://www.genome.jp/kegg-bin/show_pathway?ko03030/K02320%09red
Glycolysis / Gluconeogenesis	KEGG PATHWAY	ko00010	2	1240	0.574538	0.744654	Cluster-26447.73076|Cluster-26447.155960	K00121|K01785|	| |	||	frmA, ADH5, adhC|galM, GALM|	http://www.genome.jp/kegg-bin/show_pathway?ko00010/K00121%09red/K01785%09red
Citrate cycle (TCA cycle)	KEGG PATHWAY	ko00020	1	554	0.577764	0.744654	Cluster-26447.106874	K00030|	|	|	IDH3|	http://www.genome.jp/kegg-bin/show_pathway?ko00020/K00030%09red
Ubiquitin mediated proteolysis	KEGG PATHWAY	ko04120	2	1269	0.587161	0.744654	Cluster-26447.167047|Cluster-26447.83394	K10144|K03354|	| |	||	RCHY1, PIRH2|APC7|	http://www.genome.jp/kegg-bin/show_pathway?ko04120/K03354%09red/K10144%09red
Photosynthesis	KEGG PATHWAY	ko00195	1	573	0.590103	0.744654	Cluster-26447.107273	K02641|	|	|	petH|	http://www.genome.jp/kegg-bin/show_pathway?ko00195/K02641%09red
Glycerolipid metabolism	KEGG PATHWAY	ko00561	1	638	0.629676	0.746364	Cluster-26447.40399	K15728|	|	|	LPIN|	http://www.genome.jp/kegg-bin/show_pathway?ko00561/K15728%09red
Glutathione metabolism	KEGG PATHWAY	ko00480	1	642	0.631984	0.746364	Cluster-26447.153852	K00033|	|	|	PGD, gnd, gntZ|	http://www.genome.jp/kegg-bin/show_pathway?ko00480/K00033%09red
Pentose phosphate pathway	KEGG PATHWAY	ko00030	1	645	0.633706	0.746364	Cluster-26447.153852	K00033|	|	|	PGD, gnd, gntZ|	http://www.genome.jp/kegg-bin/show_pathway?ko00030/K00033%09red
Endocytosis	KEGG PATHWAY	ko04144	2	1479	0.670388	0.772403	Cluster-26447.87492|Cluster-26447.101104	K12486|K18468|	| |	||	SMAP|VPS35|	http://www.genome.jp/kegg-bin/show_pathway?ko04144/K18468%09red/K12486%09red
Pyruvate metabolism	KEGG PATHWAY	ko00620	1	881	0.746886	0.842233	Cluster-26447.104724	K01759|	|	|	GLO1, gloA|	http://www.genome.jp/kegg-bin/show_pathway?ko00620/K01759%09red
Glycerophospholipid metabolism	KEGG PATHWAY	ko00564	1	934	0.767093	0.846998	Cluster-26447.40399	K15728|	|	|	LPIN|	http://www.genome.jp/kegg-bin/show_pathway?ko00564/K15728%09red
Amino sugar and nucleotide sugar metabolism	KEGG PATHWAY	ko00520	1	1130	0.82889	0.892114	Cluster-26447.155211	K01183|	|	|	E3.2.1.14|	http://www.genome.jp/kegg-bin/show_pathway?ko00520/K01183%09red
Peroxisome	KEGG PATHWAY	ko04146	1	1229	0.853624	0.892114	Cluster-26447.4034	K01897|	|	|	ACSL, fadD|	http://www.genome.jp/kegg-bin/show_pathway?ko04146/K01897%09red
Ribosome	KEGG PATHWAY	ko03010	2	2199	0.858449	0.892114	Cluster-26447.107504|Cluster-26447.115812	K02927|K02942|	| |	||	RP-L40e, RPL40|RP-LP1, RPLP1|	http://www.genome.jp/kegg-bin/show_pathway?ko03010/K02942%09red/K02927%09red
Plant hormone signal transduction	KEGG PATHWAY	ko04075	1	1567	0.914272	0.931854	Cluster-26447.145914	K14498|	|	|	SNRK2|	http://www.genome.jp/kegg-bin/show_pathway?ko04075/K14498%09red
Protein processing in endoplasmic reticulum	KEGG PATHWAY	ko04141	1	1864	0.94656	0.94656	Cluster-26447.18539	K10956|	|	|	SEC61A|	http://www.genome.jp/kegg-bin/show_pathway?ko04141/K10956%09red
